# Supplementary material for: Cell wall‐derived mixed‐linked β‐1,3/1,4‐glucans trigger immune responses and disease resistance in plants
Source: PubMed Central journal article supplement — Plant J. 2021 Mar 22;106(3):601–15. doi: 10.1111/tpj.15185 (PMC8252745; doi:10.1111/tpj.15185), 2021-03-22
Supplement: TPJ-106-601-s002.pdf [file TPJ-106-601-s002.pdf]

**Table S1:** Genes differentially expressed under treatment with MLG43 in Col-0 plants

Expression level of the 1229 differentially expressed genes when treating Col-0 plants with MLG43 and comparing with genes in Col-0 mock treated plants

Up-regulated genes in the treatment. Consideration of n-fold above or equal 2 is taken. Expression in the treatment against 0 expression in Mock is also considered

Down-regulated genes in the treatment. Consideration of n-fold below or equal to 0.5 is taken

| Gene ID   | p-value MLG43 vs mock | n-fold   | Annotation                                                 |
|-----------|-----------------------|----------|------------------------------------------------------------|
| AT1G55152 | 0.002070183           | #jDIV/0! | hypothetical protein                                       |
| AT2G25297 | 0.039284851           | #jDIV/0! | transmembrane protein                                      |
| AT1G51913 | 0.008417455           | #jDIV/0! | transmembrane protein                                      |
| AT1G36640 | 0.027454977           | #jDIV/0! | transmembrane protein                                      |
| AT2G23270 | 0.003751188           | #jDIV/0! | transmembrane protein                                      |
| AT3G14225 | 0.003059848           | #jDIV/0! | GDSL-motif lipase 4                                        |
| AT3G13433 | 0.023867154           | #jDIV/0! | transmembrane protein                                      |
| AT1G14550 | 0.018360239           | #jDIV/0! | Peroxidase superfamily protein                             |
| AT4G01735 | 0.025445603           | #jDIV/0! | polyhomeotic-like protein                                  |
| AT5G60260 | 0.033734583           | #jDIV/0! | hypothetical protein                                       |
| AT3G02705 | 0.014203700           | #jDIV/0! | NA                                                         |
| AT5G44990 | 0.016138105           | #jDIV/0! | Glutathione S-transferase family protein                   |
| AT2G25409 | 0.022628538           | #jDIV/0! | hypothetical protein                                       |
| AT4G11480 | 0.020853720           | #jDIV/0! | cysteine-rich RLK (RECEPTOR-like protein kinase) 32        |
| AT1G42980 | 0.046053735           | #jDIV/0! | Actin-binding FH2 (formin homology 2) family protein       |
| AT5G52710 | 0.010610321           | #jDIV/0! | Copper transport protein family                            |
| AT5G44565 | 0.042239090           | #jDIV/0! | transmembrane protein                                      |
| AT1G51915 | 0.005921667           | #jDIV/0! | cryptdin protein-like protein                              |
| AT4G22030 | 0.037796194           | #jDIV/0! | F-box protein with a domain protein                        |
| AT4G11070 | 0.045590824           | #jDIV/0! | WRKY family transcription factor                           |
| AT5G45090 | 0.004650251           | #jDIV/0! | phloem protein 2-A7                                        |
| AT4G14368 | 0.020916092           | #jDIV/0! | Regulator of chromosome condensation (RCC1) family protein |
| AT2G40740 | 0.027074013           | #jDIV/0! | WRKY DNA-binding protein 55                                |
| AT1G13550 | 0.025161714           | #jDIV/0! | hypothetical protein (DUF1262)                             |

|           |             |           |                                                                        |
|-----------|-------------|-----------|------------------------------------------------------------------------|
| AT1G18382 | 0.024897725 | #jDIV/0!  | NA                                                                     |
| AT1G09930 | 0.020284579 | #jDIV/0!  | oligopeptide transporter 2                                             |
| AT1G49030 | 0.046336217 | #jDIV/0!  | PLAC8 family protein                                                   |
| AT2G25410 | 0.007432580 | #jDIV/0!  | RING/U-box superfamily protein                                         |
| AT5G06820 | 0.012169166 | #jDIV/0!  | STRUBBELIG-receptor family 2                                           |
| AT3G09922 | 0.019880144 | #jDIV/0!  | induced by phosphate starvation1                                       |
| AT1G16140 | 0.000062511 | #jDIV/0!  | NA                                                                     |
| AT5G22545 | 0.025300069 | #jDIV/0!  | hypothetical protein                                                   |
| AT3G61390 | 0.047979829 | #jDIV/0!  | RING/U-box superfamily protein                                         |
| AT2G47150 | 0.043560178 | #jDIV/0!  | NAD(P)-binding Rossmann-fold superfamily protein                       |
| AT4G31970 | 0.025922844 | #jDIV/0!  | cytochrome P450%2C family 82%2C subfamily C%2C polypeptide 2           |
| AT4G32510 | 0.029095872 | #jDIV/0!  | HCO3- transporter family                                               |
| AT3G50160 | 0.037550743 | #jDIV/0!  | transmembrane protein%2C putative (DUF247)                             |
| AT3G51560 | 0.006252216 | #jDIV/0!  | Disease resistance protein (TIR-NBS-LRR class) family                  |
| AT1G04127 | 0.041249252 | #jDIV/0!  | NA                                                                     |
| AT5G48890 | 0.001208848 | #jDIV/0!  | C2H2-like zinc finger protein                                          |
| AT5G53135 | 0.040295136 | #jDIV/0!  | NA                                                                     |
| AT2G01040 | 0.001229953 | #jDIV/0!  | NA                                                                     |
| AT1G27820 | 0.036077363 | #jDIV/0!  | Polynucleotidyl transferase%2C ribonuclease H-like superfamily protein |
| AT4G05940 | 0.000239534 | #jDIV/0!  | NA                                                                     |
| AT5G60350 | 0.011266216 | #jDIV/0!  | hypothetical protein                                                   |
| AT2G37810 | 0.031385429 | 231.86056 | Cysteine/Histidine-rich C1 domain family protein                       |
| AT4G11170 | 0.013197540 | 220.69772 | Disease resistance protein (TIR-NBS-LRR class) family                  |
| AT1G79680 | 0.012214081 | 187.64283 | WALL ASSOCIATED KINASE (WAK)-LIKE 10                                   |
| AT5G24110 | 0.042088281 | 182.69931 | WRKY DNA-binding protein 30                                            |
| AT1G14540 | 0.048083738 | 175.07572 | Peroxidase superfamily protein                                         |
| AT1G26380 | 0.018412427 | 161.74389 | FAD-binding Berberine family protein                                   |
| AT4G11470 | 0.013159502 | 161.28821 | cysteine-rich RLK (RECEPTOR-like protein kinase) 31                    |
| AT5G64905 | 0.008653593 | 100.76616 | elicitor peptide 3 precursor                                           |
| AT4G35180 | 0.023092930 | 90.702746 | LYS/HIS transporter 7                                                  |
| AT4G23280 | 0.005650307 | 89.429186 | cysteine-rich RLK (RECEPTOR-like protein kinase) 20                    |
| AT1G15625 | 0.007130400 | 86.969917 | E3 ubiquitin-protein ligase                                            |
| AT1G06983 | 0.036562954 | 83.207844 | NA                                                                     |

|           |             |           |                                                                           |
|-----------|-------------|-----------|---------------------------------------------------------------------------|
| AT5G47850 | 0.008903359 | 81.53014  | CRINKLY4 related 4                                                        |
| AT5G05300 | 0.023953909 | 79.779264 | hypothetical protein                                                      |
| AT1G05675 | 0.016830127 | 79.661859 | UDP-Glycosyltransferase superfamily protein                               |
| AT5G11210 | 0.007703675 | 79.387399 | glutamate receptor 2.5                                                    |
| AT4G23610 | 0.025545673 | 71.62726  | Late embryogenesis abundant (LEA) hydroxyproline-rich glycoprotein family |
| AT5G64890 | 0.001533279 | 70.407594 | elicitor peptide 2 precursor                                              |
| AT1G53625 | 0.027201988 | 69.19008  | hypothetical protein                                                      |
| AT3G29000 | 0.000435654 | 65.866277 | Calcium-binding EF-hand family protein                                    |
| AT5G52670 | 0.016160714 | 50.573165 | Copper transport protein family                                           |
| AT1G69920 | 0.015815441 | 49.735333 | glutathione S-transferase TAU 12                                          |
| AT5G57220 | 0.016510873 | 49.71037  | cytochrome P450%2C family 81%2C subfamily F%2C polypeptide 2              |
| AT4G18195 | 0.015896318 | 49.44500  | purine permease 8                                                         |
| AT1G13520 | 0.001921697 | 49.154165 | hypothetical protein (DUF1262)                                            |
| AT1G67980 | 0.000513025 | 47.501035 | caffeoyl-CoA 3-O-methyltransferase                                        |
| AT4G18250 | 0.028828255 | 44.846087 | receptor Serine/Threonine kinase-like protein                             |
| AT3G23230 | 0.033353543 | 43.67313  | Integrase-type DNA-binding superfamily protein                            |
| AT1G65484 | 0.009544266 | 43.058447 | transmembrane protein                                                     |
| AT1G78410 | 0.006268108 | 42.425907 | VQ motif-containing protein                                               |
| AT1G21120 | 0.014940176 | 41.840626 | O-methyltransferase family protein                                        |
| AT5G37490 | 0.012173302 | 41.584561 | ARM repeat superfamily protein                                            |
| AT3G53600 | 0.017071632 | 39.840753 | C2H2-type zinc finger family protein                                      |
| AT4G37290 | 0.043696751 | 39.767484 | transmembrane protein                                                     |
| AT2G32130 | 0.045721410 | 39.380293 | intracellular protein transporter%2C putative (DUF641)                    |
| AT3G54150 | 0.021412387 | 39.085315 | S-adenosyl-L-methionine-dependent methyltransferases superfamily protein  |
| AT2G26560 | 0.023193994 | 38.846073 | phospholipase A 2A                                                        |
| AT2G19190 | 0.005751695 | 36.22605  | FLG22-induced receptor-like kinase 1                                      |
| AT1G43000 | 0.024923447 | 35.527344 | PLATZ transcription factor family protein                                 |
| AT1G66090 | 0.037500000 | 35.39268  | Disease resistance protein (TIR-NBS class)                                |
| AT5G45240 | 0.026815718 | 35.250082 | Disease resistance protein (TIR-NBS-LRR class)                            |
| AT4G20000 | 0.003288737 | 34.573698 | VQ motif-containing protein                                               |
| AT5G01540 | 0.020414687 | 33.156693 | lectin receptor kinase a4.1                                               |
| AT1G56240 | 0.030793302 | 33.071166 | phloem protein 2-B13                                                      |
| AT1G17147 | 0.026002771 | 32.893207 | VQ motif-containing protein                                               |

|           |             |           |                                                                          |
|-----------|-------------|-----------|--------------------------------------------------------------------------|
| AT1G72520 | 0.016854393 | 32.644109 | PLAT/LH2 domain-containing lipoxygenase family protein                   |
| AT3G15518 | 0.012316616 | 32.399149 | hypothetical protein                                                     |
| AT1G35210 | 0.026704643 | 30.855351 | hypothetical protein                                                     |
| AT5G65600 | 0.009620898 | 30.473313 | Concanavalin A-like lectin protein kinase family protein                 |
| AT2G27389 | 0.012303537 | 30.189848 | hypothetical protein                                                     |
| AT1G26420 | 0.006669607 | 30.159165 | FAD-binding Berberine family protein                                     |
| AT3G02840 | 0.032840390 | 30.109595 | ARM repeat superfamily protein                                           |
| AT3G07195 | 0.033695176 | 29.911363 | RPM1-interacting protein 4 (RIN4) family protein                         |
| AT5G40000 | 0.005787712 | 29.591812 | P-loop containing nucleoside triphosphate hydrolases superfamily protein |
| AT1G26410 | 0.045845733 | 29.585588 | FAD-binding Berberine family protein                                     |
| AT4G14630 | 0.009631690 | 29.558382 | germin-like protein 9                                                    |
| AT4G15975 | 0.039027060 | 29.25191  | RING/U-box superfamily protein                                           |
| AT4G25350 | 0.034020438 | 29.03469  | EXS (ERD1/XPR1/SYG1) family protein                                      |
| AT4G23215 | 0.039420785 | 27.916616 | NA                                                                       |
| AT5G41750 | 0.023759385 | 27.805979 | Disease resistance protein (TIR-NBS-LRR class) family                    |
| AT1G24140 | 0.037032347 | 27.793772 | Matrixin family protein                                                  |
| AT1G30370 | 0.017363293 | 27.485504 | alpha/beta-Hydrolases superfamily protein                                |
| AT4G11890 | 0.033152528 | 27.370132 | Protein kinase superfamily protein                                       |
| AT2G39380 | 0.006910413 | 27.350407 | exocyst subunit exo70 family protein H2                                  |
| AT1G21230 | 0.009646583 | 26.485658 | wall associated kinase 5                                                 |
| AT5G27420 | 0.008004964 | 26.180404 | carbon/nitrogen insensitive 1                                            |
| AT4G15417 | 0.006505891 | 26.13381  | RNAse II-like 1                                                          |
| AT4G15236 | 0.020951325 | 26.025665 | ABC-2 and Plant PDR ABC-type transporter family protein                  |
| AT5G39670 | 0.008767966 | 25.913661 | Calcium-binding EF-hand family protein                                   |
| AT1G30700 | 0.013640338 | 25.673118 | FAD-binding Berberine family protein                                     |
| AT5G28610 | 0.015482506 | 25.291359 | LOW protein: ATP-dependent RNA helicase DRS1-like protein                |
| AT1G47890 | 0.038239549 | 24.868142 | receptor like protein 7                                                  |
| AT1G67000 | 0.039130398 | 24.661018 | Protein kinase superfamily protein                                       |
| AT1G21110 | 0.010489821 | 23.767713 | O-methyltransferase family protein                                       |
| AT1G68450 | 0.027597603 | 23.576364 | VQ motif-containing protein                                              |
| AT4G37370 | 0.012351809 | 23.220282 | cytochrome P450%2C family 81%2C subfamily D%2C polypeptide 8             |
| AT1G51920 | 0.033425400 | 22.93315  | transmembrane protein                                                    |
| AT3G21520 | 0.008816612 | 22.246688 | transmembrane protein%2C putative (DUF679 domain membrane protein 1)     |

|           |             |           |                                                                          |
|-----------|-------------|-----------|--------------------------------------------------------------------------|
| AT1G05933 | 0.010221444 | 22.178965 | NA                                                                       |
| AT3G48450 | 0.036383644 | 21.216394 | RPM1-interacting protein 4 (RIN4) family protein                         |
| AT2G17740 | 0.001861024 | 20.836448 | Cysteine/Histidine-rich C1 domain family protein                         |
| AT2G18210 | 0.020954066 | 20.800854 | hypothetical protein                                                     |
| AT1G19020 | 0.020340996 | 20.750284 | CDP-diacylglycerol-glycerol-3-phosphate 3-phosphatidyltransferase        |
| AT3G13432 | 0.008468777 | 20.499237 | transmembrane protein                                                    |
| AT3G28580 | 0.007211933 | 20.148234 | P-loop containing nucleoside triphosphate hydrolases superfamily protein |
| AT2G43000 | 0.024344827 | 20.017498 | NAC domain containing protein 42                                         |
| AT2G44578 | 0.002533424 | 19.983949 | RING/U-box superfamily protein                                           |
| AT2G44370 | 0.002600024 | 19.798325 | Cysteine/Histidine-rich C1 domain family protein                         |
| AT4G23220 | 0.015262617 | 19.781979 | cysteine-rich RECEPTOR-like kinase                                       |
| AT3G19615 | 0.000115343 | 19.747605 | beta-1%2C4-xylosidase                                                    |
| AT2G17050 | 0.029134006 | 19.344322 | disease resistance protein (TIR-NBS-LRR class)                           |
| AT4G40020 | 0.000019026 | 19.338351 | Myosin heavy chain-related protein                                       |
| AT1G69150 | 0.040867406 | 18.989949 | Cysteine/Histidine-rich C1 domain family protein                         |
| AT1G13480 | 0.003915681 | 18.985067 | hypothetical protein (DUF1262)                                           |
| AT4G14365 | 0.022596776 | 18.823084 | hypothetical protein                                                     |
| AT4G11000 | 0.002483657 | 18.800644 | Ankyrin repeat family protein                                            |
| AT2G35658 | 0.040977965 | 18.796245 | transmembrane protein                                                    |
| AT1G36622 | 0.049479983 | 18.464616 | transmembrane protein                                                    |
| AT1G18570 | 0.003596581 | 18.090459 | myb domain protein 51                                                    |
| AT1G50750 | 0.021291388 | 18.012808 | aminotransferase-like%2C mobile domain protein                           |
| AT5G42380 | 0.011386613 | 17.725013 | calmodulin like 37                                                       |
| AT5G45070 | 0.038821126 | 17.434351 | phloem protein 2-A8                                                      |
| AT2G39200 | 0.002571077 | 17.165737 | Seven transmembrane MLO family protein                                   |
| AT5G19240 | 0.008086996 | 16.950657 | Glycoprotein membrane precursor GPI-anchored                             |
| AT4G14450 | 0.019341021 | 16.89269  | hypothetical protein                                                     |
| AT4G21390 | 0.021598479 | 16.669587 | S-locus lectin protein kinase family protein                             |
| AT1G09353 | 0.025438136 | 16.659389 | NA                                                                       |
| AT5G62150 | 0.017302911 | 16.542675 | peptidoglycan-binding LysM domain-containing protein                     |
| AT5G01550 | 0.010004125 | 16.516182 | lectin receptor kinase a4.1                                              |
| AT2G46430 | 0.002378405 | 16.38367  | cyclic nucleotide gated channel 3                                        |
| AT4G39580 | 0.013443459 | 16.329845 | Galactose oxidase/kelch repeat superfamily protein                       |

|           |             |           |                                                                          |
|-----------|-------------|-----------|--------------------------------------------------------------------------|
| AT3G49580 | 0.006268262 | 16.169421 | response to low sulfur 1                                                 |
| AT3G11840 | 0.022633622 | 16.084059 | E3 ubiquitin-protein ligase PUB24-like protein                           |
| AT5G48540 | 0.003702979 | 16.016925 | receptor-like protein kinase-related family protein                      |
| AT1G02400 | 0.045295137 | 15.967254 | gibberellin 2-oxidase 6                                                  |
| AT1G51890 | 0.006257557 | 15.800888 | Leucine-rich repeat protein kinase family protein                        |
| AT5G44585 | 0.013966680 | 15.613927 | hypothetical protein                                                     |
| AT5G28630 | 0.022170965 | 15.44775  | glycine-rich protein                                                     |
| AT2G32030 | 0.012555091 | 15.253529 | Acyl-CoA N-acyltransferases (NAT) superfamily protein                    |
| AT3G16530 | 0.015628025 | 15.142202 | Legume lectin family protein                                             |
| AT4G23810 | 0.004669108 | 14.981836 | WRKY family transcription factor                                         |
| AT5G52760 | 0.045733887 | 14.895766 | Copper transport protein family                                          |
| AT1G80820 | 0.017401755 | 14.752973 | cinnamoyl coa reductase                                                  |
| AT2G24600 | 0.024308590 | 14.713255 | Ankyrin repeat family protein                                            |
| AT5G52750 | 0.013117609 | 14.660302 | Heavy metal transport/detoxification superfamily protein                 |
| AT5G12340 | 0.011553280 | 14.597931 | DUF4228 domain protein                                                   |
| AT5G22530 | 0.025396999 | 14.576098 | hypothetical protein                                                     |
| AT1G02360 | 0.002520153 | 14.553381 | Chitinase family protein                                                 |
| AT1G05575 | 0.010203099 | 14.35434  | transmembrane protein                                                    |
| AT2G38470 | 0.002953143 | 14.306569 | WRKY DNA-binding protein 33                                              |
| AT5G25250 | 0.035589970 | 14.287372 | SPFH/Band 7/PHB domain-containing membrane-associated protein family     |
| AT3G50930 | 0.021327542 | 14.09434  | cytochrome BC1 synthesi                                                  |
| AT5G02895 | 0.010550204 | 14.040954 | NA                                                                       |
| AT1G63245 | 0.026812128 | 13.965071 | CLAVATA3/ESR-RELATED 14                                                  |
| AT4G18205 | 0.003009543 | 13.807777 | Nucleotide-sugar transporter family protein                              |
| AT1G55450 | 0.012582516 | 13.780714 | S-adenosyl-L-methionine-dependent methyltransferases superfamily protein |
| AT2G17040 | 0.027711169 | 13.596811 | NAC domain containing protein 36                                         |
| AT1G65390 | 0.018772293 | 13.514792 | phloem protein 2 A5                                                      |
| AT4G21920 | 0.029893710 | 13.41589  | hypothetical protein                                                     |
| AT2G25735 | 0.020376000 | 13.409806 | hypothetical protein                                                     |
| AT4G23170 | 0.001405919 | 13.204121 | receptor-like protein kinase-related family protein                      |
| AT2G07305 | 0.042090948 | 13.188177 | NA                                                                       |
| AT1G61550 | 0.000107728 | 12.958434 | S-locus lectin protein kinase family protein                             |
| AT4G14370 | 0.018455456 | 12.954327 | Disease resistance protein (TIR-NBS-LRR class) family                    |

|           |             |           |                                                                                        |
|-----------|-------------|-----------|----------------------------------------------------------------------------------------|
| AT1G74360 | 0.002435889 | 12.901953 | Leucine-rich repeat protein kinase family protein                                      |
| AT4G36500 | 0.021836562 | 12.89386  | hypothetical protein                                                                   |
| AT3G02585 | 0.035255580 | 12.77085  | NA                                                                                     |
| AT3G46680 | 0.009257044 | 12.500982 | UDP-Glycosyltransferase superfamily protein                                            |
| AT3G17690 | 0.018926278 | 12.435531 | cyclic nucleotide gated channel 19                                                     |
| AT4G18197 | 0.015411145 | 12.382749 | purine permease 7                                                                      |
| AT4G20780 | 0.021394792 | 12.322943 | calmodulin like 42                                                                     |
| AT1G49000 | 0.010829524 | 12.297153 | transmembrane protein                                                                  |
| AT1G58420 | 0.036654414 | 12.281304 | Uncharacterized conserved protein UCP031279                                            |
| AT3G04220 | 0.031516178 | 12.245805 | Disease resistance protein (TIR-NBS-LRR class) family                                  |
| AT1G07135 | 0.034899682 | 12.176516 | glycine-rich protein                                                                   |
| AT5G44070 | 0.008575798 | 12.124827 | phytochelatin synthase 1 (PCS1)                                                        |
| AT1G50745 | 0.018101728 | 11.983591 | plant mobile domain protein                                                            |
| AT5G51190 | 0.004194448 | 11.791818 | Integrase-type DNA-binding superfamily protein                                         |
| AT2G08740 | 0.004367618 | 11.76259  | NA                                                                                     |
| AT3G04135 | 0.047736153 | 11.735624 | NA                                                                                     |
| AT5G40590 | 0.003613718 | 11.609986 | Cysteine/Histidine-rich C1 domain family protein                                       |
| AT2G35930 | 0.014155736 | 11.595458 | plant U-box 23                                                                         |
| AT5G60900 | 0.026964657 | 11.547431 | receptor-like protein kinase 1                                                         |
| AT2G27660 | 0.009476167 | 11.419056 | Cysteine/Histidine-rich C1 domain family protein                                       |
| AT4G21903 | 0.001579847 | 11.392966 | MATE efflux family protein                                                             |
| AT2G28815 | 0.020974821 | 11.310089 | 50S ribosomal protein L16                                                              |
| AT1G30757 | 0.014939325 | 11.278493 | transmembrane protein                                                                  |
| AT2G01360 | 0.042818736 | 11.241004 | pentatricopeptide (PPR) repeat protein                                                 |
| AT4G23190 | 0.008956847 | 11.215314 | cysteine-rich RLK (RECEPTOR-like protein kinase) 11                                    |
| AT5G43420 | 0.017812759 | 11.176448 | RING/U-box superfamily protein                                                         |
| AT5G59680 | 0.006500426 | 11.116207 | Leucine-rich repeat protein kinase family protein                                      |
| AT5G26920 | 0.020967278 | 11.101236 | Cam-binding protein 60-like G                                                          |
| AT1G09932 | 0.027517901 | 11.075818 | Phosphoglycerate mutase family protein                                                 |
| AT4G17490 | 0.001459416 | 11.05233  | ethylene responsive element binding factor 6                                           |
| AT1G27730 | 0.012180599 | 11.041021 | salt tolerance zinc finger                                                             |
| AT5G25930 | 0.004935803 | 11.028238 | kinase family with leucine-rich repeat domain-containing protein                       |
| AT3G25610 | 0.013712927 | 10.929687 | ATPase E1-E2 type family protein / haloacid dehalogenase-like hydrolase family protein |

|           |             |           |                                                         |
|-----------|-------------|-----------|---------------------------------------------------------|
| AT5G14700 | 0.021293980 | 10.815928 | NAD(P)-binding Rossmann-fold superfamily protein        |
| AT2G28210 | 0.017128698 | 10.764105 | alpha carbonic anhydrase 2                              |
| AT5G38310 | 0.018414525 | 10.691451 | hypothetical protein                                    |
| AT1G30755 | 0.011749347 | 10.674724 | elongation factor G%2C putative (DUF668)                |
| AT1G28480 | 0.011616656 | 10.625539 | Thioredoxin superfamily protein                         |
| AT5G67450 | 0.000004699 | 10.523426 | zinc-finger protein 1                                   |
| AT5G48530 | 0.019155724 | 10.465652 | hypothetical protein                                    |
| AT1G51820 | 0.022453045 | 10.453927 | Leucine-rich repeat protein kinase family protein       |
| AT1G65481 | 0.004529316 | 10.409953 | transmembrane protein                                   |
| AT1G06137 | 0.040009245 | 10.374137 | transmembrane protein                                   |
| AT5G48430 | 0.000324540 | 10.286483 | Eukaryotic aspartyl protease family protein             |
| AT3G02695 | 0.024375024 | 10.236747 | NA                                                      |
| AT1G61360 | 0.007930558 | 10.200962 | S-locus lectin protein kinase family protein            |
| AT5G09800 | 0.031702135 | 10.149433 | ARM repeat superfamily protein                          |
| AT4G24570 | 0.009295309 | 10.078997 | dicarboxylate carrier 2                                 |
| AT4G26200 | 0.002545278 | 10.072843 | 1-amino-cyclopropane-1-carboxylate synthase 7           |
| AT5G39020 | 0.013372390 | 10.040036 | Malectin/receptor-like protein kinase family protein    |
| AT2G42060 | 0.002422124 | 10.036541 | Cysteine/Histidine-rich C1 domain family protein        |
| AT3G18250 | 0.012355378 | 9.9651873 | Putative membrane lipoprotein                           |
| AT2G15220 | 0.005707762 | 9.9627537 | Plant basic secretory protein (BSP) family protein      |
| AT2G04510 | 0.027486567 | 9.8098683 | NA                                                      |
| AT3G15356 | 0.033241277 | 9.7606357 | Legume lectin family protein                            |
| AT2G20562 | 0.033976750 | 9.7413538 | taximin                                                 |
| AT4G38550 | 0.001736116 | 9.7344618 | phospholipase-like protein (PEARLI 4) family protein    |
| AT5G44910 | 0.005535864 | 9.731977  | Toll-Interleukin-Resistance (TIR) domain family protein |
| AT1G13210 | 0.011295694 | 9.6939225 | autoinhibited Ca <sup>2+</sup> /ATPase II               |
| AT4G03480 | 0.009700620 | 9.6657192 | Ankyrin repeat family protein                           |
| AT4G23180 | 0.007910885 | 9.6328183 | cysteine-rich RLK (RECEPTOR-like protein kinase) 10     |
| AT2G32020 | 0.011828259 | 9.5811258 | Acyl-CoA N-acyltransferases (NAT) superfamily protein   |
| AT2G07769 | 0.008359846 | 9.5246596 | NA                                                      |
| AT5G47230 | 0.002549238 | 9.5087449 | ethylene responsive element binding factor 5            |
| AT4G28085 | 0.023851284 | 9.485539  | transmembrane protein                                   |
| AT5G35735 | 0.020809714 | 9.4718375 | Auxin-responsive family protein                         |



|           |             |           |                                                                     |
|-----------|-------------|-----------|---------------------------------------------------------------------|
| AT1G20310 | 0.048820826 | 9.4068013 | syringolide-induced protein                                         |
| AT4G35590 | 0.043927968 | 9.3722691 | RWP-RK domain-containing protein                                    |
| AT3G52400 | 0.011688237 | 9.3424467 | syntaxin of plants 122                                              |
| AT2G22500 | 0.016770321 | 9.334082  | uncoupling protein 5                                                |
| AT1G67520 | 0.007007583 | 9.2526645 | lectin protein kinase family protein                                |
| AT3G16030 | 0.015366293 | 9.2148465 | lectin protein kinase family protein                                |
| AT5G01100 | 0.039006806 | 9.209366  | O-fucosyltransferase family protein                                 |
| AT2G18680 | 0.000057382 | 9.2083842 | transmembrane protein                                               |
| AT2G15390 | 0.008492590 | 9.159987  | fucosyltransferase 4                                                |
| AT5G42930 | 0.030230439 | 9.1336947 | alpha/beta-Hydrolases superfamily protein                           |
| AT4G24310 | 0.000009088 | 9.1220987 | transmembrane protein%2C putative (DUF679)                          |
| AT3G05370 | 0.000870075 | 9.1149453 | receptor like protein 31                                            |
| AT4G36052 | 0.003710085 | 9.0997387 | NA                                                                  |
| AT5G54710 | 0.024005381 | 9.0869708 | Ankyrin repeat family protein                                       |
| AT3G12880 | 0.021341173 | 9.0774836 | Plant invertase/pectin methylesterase inhibitor superfamily protein |
| AT1G16160 | 0.029351367 | 9.0381148 | wall associated kinase-like 5                                       |
| AT1G80840 | 0.025001605 | 9.0342088 | WRKY DNA-binding protein 40                                         |
| AT2G20142 | 0.003136161 | 8.9668253 | Toll-Interleukin-Resistance (TIR) domain family protein             |
| AT4G37780 | 0.029601427 | 8.9355189 | myb domain protein 87                                               |
| AT2G44840 | 0.031817932 | 8.8970038 | ethylene-responsive element binding factor 13                       |
| AT5G41740 | 0.008629786 | 8.8710175 | Disease resistance protein (TIR-NBS-LRR class) family               |
| AT5G15130 | 0.000132699 | 8.8032333 | WRKY DNA-binding protein 72                                         |
| AT3G55980 | 0.007806593 | 8.7965592 | salt-inducible zinc finger 1                                        |
| AT4G29340 | 0.011038525 | 8.7684436 | profilin 4                                                          |
| AT2G31865 | 0.013305648 | 8.7370508 | poly(ADP-ribose) glycohydrolase 2                                   |
| AT4G39830 | 0.002058497 | 8.7206483 | Cupredoxin superfamily protein                                      |
| AT4G18253 | 0.046548645 | 8.7064871 | receptor Serine/Threonine kinase-like protein                       |
| AT3G18710 | 0.000018939 | 8.693845  | plant U-box 29                                                      |
| AT4G11280 | 0.008433899 | 8.6936096 | 1-aminocyclopropane-1-carboxylic acid (acc) synthase 6              |
| AT2G31880 | 0.016145794 | 8.6808078 | Leucine-rich repeat protein kinase family protein                   |
| AT1G19250 | 0.039368978 | 8.6584154 | flavin-dependent monooxygenase 1                                    |
| AT2G40095 | 0.014217762 | 8.5356474 | Alpha/beta hydrolase related protein                                |
| AT3G21070 | 0.014724323 | 8.4688528 | NAD kinase 1                                                        |

|           |             |           |                                                                          |
|-----------|-------------|-----------|--------------------------------------------------------------------------|
| AT4G38560 | 0.025478919 | 8.3277878 | phospholipase-like protein (PEARLI 4) family protein                     |
| AT4G39670 | 0.029257712 | 8.3194127 | Glycolipid transfer protein (GLTP) family protein                        |
| AT3G21781 | 0.021745002 | 8.3116256 | NA                                                                       |
| AT4G01750 | 0.007339383 | 8.3055777 | rhamnogalacturonan xylosyltransferase 2                                  |
| AT5G25910 | 0.000068038 | 8.2830626 | receptor like protein 52                                                 |
| AT1G18390 | 0.001700117 | 8.2777798 | Serine/Threonine kinase family catalytic domain protein                  |
| AT2G37940 | 0.011714787 | 8.2557904 | Inositol phosphorylceramide synthase 2                                   |
| AT3G09830 | 0.008573910 | 8.1945497 | Protein kinase superfamily protein                                       |
| AT4G04075 | 0.018238230 | 8.171316  | NA                                                                       |
| AT3G26500 | 0.007104287 | 8.1579752 | plant intracellular ras group-related LRR 2                              |
| AT5G23510 | 0.020669717 | 8.124052  | hypothetical protein                                                     |
| AT5G66790 | 0.010209056 | 8.0883994 | Protein kinase superfamily protein                                       |
| AT5G41680 | 0.026614080 | 8.0120779 | Protein kinase superfamily protein                                       |
| AT1G68765 | 0.038006805 | 7.9335031 | Putative membrane lipoprotein                                            |
| AT5G45340 | 0.000017763 | 7.9238864 | cytochrome P450%2C family 707%2C subfamily A%2C polypeptide 3            |
| AT1G06073 | 0.020575347 | 7.9237178 | NA                                                                       |
| AT1G02920 | 0.013042055 | 7.8579    | glutathione S-transferase 7                                              |
| AT1G32960 | 0.047081776 | 7.8151742 | Subtilase family protein                                                 |
| AT2G22870 | 0.007297849 | 7.7965592 | P-loop containing nucleoside triphosphate hydrolases superfamily protein |
| AT1G76430 | 0.020443603 | 7.7586375 | phosphate transporter 1%3B9                                              |
| AT3G61190 | 0.009304403 | 7.7497594 | BON association protein 1                                                |
| AT5G67340 | 0.009407633 | 7.7464391 | ARM repeat superfamily protein                                           |
| AT1G59870 | 0.015278353 | 7.7115459 | ABC-2 and Plant PDR ABC-type transporter family protein                  |
| AT1G24150 | 0.015763556 | 7.673322  | formin homologue 4                                                       |
| AT4G22710 | 0.020668014 | 7.6672226 | cytochrome P450%2C family 706%2C subfamily A%2C polypeptide 2            |
| AT1G65850 | 0.001914428 | 7.5816421 | Disease resistance protein (TIR-NBS-LRR class) family                    |
| AT5G41550 | 0.004492660 | 7.5266735 | Disease resistance protein (TIR-NBS-LRR class) family                    |
| AT3G03125 | 0.018499084 | 7.525904  | NA                                                                       |
| AT3G21150 | 0.006209183 | 7.5207462 | B-box 32                                                                 |
| AT2G18690 | 0.002009085 | 7.5202786 | transmembrane protein                                                    |
| AT1G17990 | 0.002053398 | 7.4941863 | FMN-linked oxidoreductases superfamily protein                           |
| AT1G28370 | 0.033307839 | 7.4619552 | ERF domain protein 11                                                    |
| AT3G55150 | 0.007156815 | 7.4357085 | exocyst subunit exo70 family protein H1                                  |

|           |             |           |                                                                           |
|-----------|-------------|-----------|---------------------------------------------------------------------------|
| AT1G61460 | 0.026004524 | 7.3181044 | G-type lectin S-receptor-like Serine/Threonine-kinase                     |
| AT2G35710 | 0.024263952 | 7.2984118 | Nucleotide-diphospho-sugar transferases superfamily protein               |
| AT1G70170 | 0.009811181 | 7.2981719 | matrix metalloproteinase                                                  |
| AT1G51620 | 0.026025145 | 7.2937269 | Protein kinase superfamily protein                                        |
| AT4G10510 | 0.033459284 | 7.2744759 | Subtilase family protein                                                  |
| AT5G42830 | 0.012627645 | 7.2731387 | HXXXD-type acyl-transferase family protein                                |
| AT3G10930 | 0.022125606 | 7.2690668 | hypothetical protein                                                      |
| AT1G14870 | 0.001277544 | 7.1701716 | PLANT CADMIUM RESISTANCE 2                                                |
| AT5G05215 | 0.001710238 | 7.1524769 | NA                                                                        |
| AT1G18020 | 0.022237887 | 7.1470779 | FMN-linked oxidoreductases superfamily protein                            |
| AT5G58940 | 0.003710237 | 7.1294913 | calmodulin-binding receptor-like cytoplasmic kinase 1                     |
| AT1G70581 | 0.004633924 | 7.1267307 | NA                                                                        |
| AT3G08720 | 0.039030035 | 7.097712  | serine/threonine protein kinase 2                                         |
| AT5G06740 | 0.000259753 | 7.0968703 | Concanavalin A-like lectin protein kinase family protein                  |
| AT1G17420 | 0.035083278 | 7.0901464 | lipoygenase 3                                                             |
| AT2G25460 | 0.009755254 | 7.0806151 | EEIG1/EHBP1 protein amino-terminal domain protein                         |
| AT5G01005 | 0.003092393 | 7.0562501 | NA                                                                        |
| AT3G17700 | 0.016360728 | 7.040544  | cyclic nucleotide-binding transporter 1                                   |
| AT2G35980 | 0.000282821 | 7.0150887 | Late embryogenesis abundant (LEA) hydroxyproline-rich glycoprotein family |
| AT5G22250 | 0.000386363 | 6.968975  | Polynucleotidyl transferase%2C ribonuclease H-like superfamily protein    |
| AT4G39890 | 0.019025171 | 6.9564273 | RAB GTPase homolog H1C                                                    |
| AT3G47090 | 0.001800935 | 6.933876  | Leucine-rich repeat protein kinase family protein                         |
| AT1G62300 | 0.013328341 | 6.8439189 | WRKY family transcription factor                                          |
| AT5G43520 | 0.013606489 | 6.8202392 | Cysteine/Histidine-rich C1 domain family protein                          |
| AT2G23680 | 0.012563042 | 6.7652216 | Cold acclimation protein WCOR413 family                                   |
| AT2G40140 | 0.008732937 | 6.7530762 | zinc finger (CCCH-type) family protein                                    |
| AT5G49780 | 0.003368321 | 6.6921785 | Leucine-rich repeat protein kinase family protein                         |
| AT1G71400 | 0.000011150 | 6.6666551 | receptor like protein 12                                                  |
| AT2G26190 | 0.006900504 | 6.6376164 | calmodulin-binding family protein                                         |
| AT1G07000 | 0.031371605 | 6.6152032 | exocyst subunit exo70 family protein B2                                   |
| AT2G44490 | 0.005423182 | 6.6119582 | Glycosyl hydrolase superfamily protein                                    |
| AT2G13800 | 0.016930440 | 6.5474524 | somatic embryogenesis receptor-like kinase 5                              |
| AT3G26910 | 0.005643342 | 6.5451468 | hydroxyproline-rich glycoprotein family protein                           |

|           |             |           |                                                                           |
|-----------|-------------|-----------|---------------------------------------------------------------------------|
| AT4G30430 | 0.001668922 | 6.5321989 | tetraspanin9                                                              |
| AT2G39650 | 0.021072973 | 6.4877938 | cruciferin (DUF506)                                                       |
| AT4G19370 | 0.017575661 | 6.4838869 | chitin synthase%2C putative (DUF1218)                                     |
| AT4G31550 | 0.013460930 | 6.4398992 | WRKY DNA-binding protein 11                                               |
| AT2G20960 | 0.005019869 | 6.4259509 | phospholipase-like protein (PEARLI 4) family protein                      |
| AT1G69930 | 0.038242512 | 6.3515495 | glutathione S-transferase TAU 11                                          |
| AT1G73805 | 0.000646213 | 6.347855  | Calmodulin binding protein-like protein                                   |
| AT2G01180 | 0.014532669 | 6.3398508 | phosphatidic acid phosphatase 1                                           |
| AT2G39518 | 0.000450986 | 6.3217364 | Uncharacterized protein family (UPF0497)                                  |
| AT3G52450 | 0.005703181 | 6.3152395 | plant U-box 22                                                            |
| AT1G21130 | 0.009651276 | 6.2811679 | O-methyltransferase family protein                                        |
| AT2G17060 | 0.038166406 | 6.2770284 | Disease resistance protein (TIR-NBS-LRR class) family                     |
| AT1G74650 | 0.018774293 | 6.2687795 | myb domain protein 31                                                     |
| AT3G45440 | 0.004026072 | 6.2626398 | Concanavalin A-like lectin protein kinase family protein                  |
| AT5G38210 | 0.013576772 | 6.2255317 | Protein kinase family protein                                             |
| AT4G02410 | 0.000801002 | 6.2074602 | Concanavalin A-like lectin protein kinase family protein                  |
| AT3G50260 | 0.014369713 | 6.2070293 | cooperatively regulated by ethylene and jasmonate 1                       |
| AT3G09020 | 0.007294852 | 6.1924712 | alpha 1%2C4-glycosyltransferase family protein                            |
| AT5G41100 | 0.008297699 | 6.1445237 | hydroxyproline-rich glycoprotein family protein                           |
| AT1G57630 | 0.017564940 | 6.1165583 | Toll-Interleukin-Resistance (TIR) domain family protein                   |
| AT1G64065 | 0.045233298 | 6.1037998 | Late embryogenesis abundant (LEA) hydroxyproline-rich glycoprotein family |
| AT5G08990 | 0.028025501 | 6.0985265 | NA                                                                        |
| AT4G22690 | 0.015299772 | 6.0783843 | cytochrome P450%2C family 706%2C subfamily A%2C polypeptide 1             |
| AT4G27280 | 0.015289526 | 6.076886  | Calcium-binding EF-hand family protein                                    |
| AT3G52748 | 0.020435293 | 6.0545124 | NA                                                                        |
| AT4G28350 | 0.000034828 | 5.9590245 | Concanavalin A-like lectin protein kinase family protein                  |
| AT1G74590 | 0.020130169 | 5.9548071 | glutathione S-transferase TAU 10                                          |
| AT1G30190 | 0.045382373 | 5.936852  | cotton fiber protein                                                      |
| AT2G33710 | 0.034066850 | 5.9224696 | Integrase-type DNA-binding superfamily protein                            |
| AT5G04340 | 0.003651715 | 5.9135136 |                                                                           |
| AT1G57990 | 0.017706996 | 5.885937  | purine permease 18                                                        |
| AT3G49570 | 0.004070740 | 5.8597601 | response to low sulfur 3                                                  |
| AT4G20830 | 0.009504923 | 5.8542424 | FAD-binding Berberine family protein                                      |

|           |             |           |                                                                              |
|-----------|-------------|-----------|------------------------------------------------------------------------------|
| AT1G72920 | 0.012727062 | 5.8484201 | Toll-Interleukin-Resistance (TIR) domain family protein                      |
| AT2G40180 | 0.031982190 | 5.8427041 | phosphatase 2C5                                                              |
| AT5G64900 | 0.031038274 | 5.8398455 | precursor of peptide 1                                                       |
| AT4G11521 | 0.016604856 | 5.8341808 | Receptor-like protein kinase-related family protein                          |
| AT4G29780 | 0.005252573 | 5.8115708 | nuclease                                                                     |
| AT1G73810 | 0.033214999 | 5.8011594 | Core-2/I-branching beta-1%2C6-N-acetylglucosaminyltransferase family protein |
| AT2G24160 | 0.002977793 | 5.7885811 | NA                                                                           |
| AT5G25920 | 0.031543488 | 5.7882435 | hypothetical protein                                                         |
| AT3G03030 | 0.019612814 | 5.7525311 | F-box/RNI-like superfamily protein                                           |
| AT1G28190 | 0.009702870 | 5.7452198 | hypothetical protein                                                         |
| AT1G51800 | 0.018877067 | 5.7290079 | Leucine-rich repeat protein kinase family protein                            |
| AT1G61340 | 0.031257011 | 5.68715   | F-box family protein                                                         |
| AT3G07600 | 0.001138300 | 5.6843019 | Heavy metal transport/detoxification superfamily protein                     |
| AT3G52520 | 0.025731294 | 5.6728876 | hypothetical protein                                                         |
| AT5G47960 | 0.000046245 | 5.6557327 | RAB GTPase homolog A4C                                                       |
| AT2G46400 | 0.003437773 | 5.630173  | WRKY DNA-binding protein 46                                                  |
| AT4G08850 | 0.007403460 | 5.6274785 | Leucine-rich repeat receptor-like protein kinase family protein              |
| AT3G43840 | 0.024072757 | 5.6027875 | 3-oxo-5-alpha-steroid 4-dehydrogenase family protein                         |
| AT5G64870 | 0.015613772 | 5.5786271 | SPFH/Band 7/PHB domain-containing membrane-associated protein family         |
| AT4G35480 | 0.023030389 | 5.560062  | RING-H2 finger A3B                                                           |
| AT5G46080 | 0.013585094 | 5.5455839 | Protein kinase superfamily protein                                           |
| AT5G67310 | 0.002392899 | 5.5240747 | cytochrome P450%2C family 81%2C subfamily G%2C polypeptide 1                 |
| AT1G52200 | 0.002327256 | 5.5201563 | PLAC8 family protein                                                         |
| AT1G51850 | 0.002060857 | 5.5166135 | Leucine-rich repeat protein kinase family protein                            |
| AT5G66210 | 0.006053963 | 5.5090045 | calcium-dependent protein kinase 28                                          |
| AT2G13790 | 0.012880316 | 5.5063076 | somatic embryogenesis receptor-like kinase 4                                 |
| AT1G16130 | 0.011747253 | 5.4670015 | wall associated kinase-like 2                                                |
| AT5G17350 | 0.020233132 | 5.4557968 | hypothetical protein                                                         |
| AT1G14040 | 0.002463510 | 5.4488026 | EXS (ERD1/XPR1/SYG1) family protein                                          |
| AT3G45640 | 0.009639396 | 5.441812  | mitogen-activated protein kinase 3                                           |
| AT3G09010 | 0.019309742 | 5.4283386 | Protein kinase superfamily protein                                           |
| AT3G28850 | 0.004049115 | 5.4202794 | Glutaredoxin family protein                                                  |
| AT1G02930 | 0.013053663 | 5.4139726 | glutathione S-transferase 6                                                  |

|           |             |           |                                                                         |
|-----------|-------------|-----------|-------------------------------------------------------------------------|
| AT4G08860 | 0.033743541 | 5.4048233 | NA                                                                      |
| AT3G04210 | 0.024589880 | 5.3909405 | Disease resistance protein (TIR-NBS class)                              |
| AT1G72900 | 0.016177218 | 5.3700227 | Toll-Interleukin-Resistance (TIR) domain-containing protein             |
| AT3G09345 | 0.029919771 | 5.3637388 | NA                                                                      |
| AT4G15233 | 0.042264266 | 5.3456165 | ABC-2 and Plant PDR ABC-type transporter family protein                 |
| AT3G09520 | 0.019532588 | 5.3025049 | exocyst subunit exo70 family protein H4                                 |
| AT5G54720 | 0.026954202 | 5.2939856 | Ankyrin repeat family protein                                           |
| AT1G68690 | 0.006021838 | 5.2565493 | Protein kinase superfamily protein                                      |
| AT4G30280 | 0.031935964 | 5.2452194 | xyloglucan endotransglucosylase/hydrolase 18                            |
| AT1G51700 | 0.012666918 | 5.2395318 | DOF zinc finger protein 1                                               |
| AT5G47910 | 0.007656556 | 5.2329468 | respiratory burst oxidase homologue D                                   |
| AT5G63130 | 0.015937775 | 5.2191062 | Octicosapeptide/Phox/Bem1p family protein                               |
| AT3G57740 | 0.032073761 | 5.2172595 | Protein kinase superfamily protein                                      |
| AT5G45080 | 0.002418965 | 5.2131764 | phloem protein 2-A6                                                     |
| AT4G31800 | 0.007249123 | 5.1909257 | WRKY DNA-binding protein 18                                             |
| AT2G09994 | 0.047582533 | 5.1838704 | NA                                                                      |
| AT1G33600 | 0.012020732 | 5.1831648 | Leucine-rich repeat (LRR) family protein                                |
| AT4G19920 | 0.003604015 | 5.1803363 | Toll-Interleukin-Resistance (TIR) domain family protein                 |
| AT5G48410 | 0.001909403 | 5.161622  | glutamate receptor 1.3                                                  |
| AT1G55365 | 0.007923054 | 5.1604026 | hypothetical protein                                                    |
| AT4G23550 | 0.005681626 | 5.1529162 | WRKY family transcription factor                                        |
| AT3G11080 | 0.006077188 | 5.1467797 | receptor like protein 35                                                |
| AT1G32920 | 0.019134363 | 5.1334891 | hypothetical protein                                                    |
| AT4G01010 | 0.041236836 | 5.1007389 | cyclic nucleotide-gated channel 13                                      |
| AT3G45960 | 0.010449570 | 5.0910327 | expansin-like A3                                                        |
| AT4G25719 | 0.006374237 | 5.0882625 | NA                                                                      |
| AT2G46440 | 0.024475519 | 5.0865984 | cyclic nucleotide-gated channels                                        |
| AT2G07713 | 0.044710754 | 5.0804685 | hypothetical protein                                                    |
| ATMG00540 | 0.044710754 | 5.0804685 | hypothetical protein                                                    |
| AT5G02690 | 0.011115665 | 5.0758441 | hypothetical protein                                                    |
| AT3G19010 | 0.008253151 | 5.0712696 | 2-oxoglutarate (2OG) and Fe(II)-dependent oxygenase superfamily protein |
| AT3G23250 | 0.022767037 | 5.06633   | myb domain protein 15                                                   |
| AT5G44568 | 0.009985784 | 5.0623065 | transmembrane protein                                                   |

|           |             |           |                                                                                      |
|-----------|-------------|-----------|--------------------------------------------------------------------------------------|
| AT5G15870 | 0.009953043 | 5.0585864 | glycosyl hydrolase family 81 protein                                                 |
| AT2G23770 | 0.017463997 | 5.0540287 | protein kinase family protein / peptidoglycan-binding LysM domain-containing protein |
| AT3G22125 | 0.015861184 | 5.0535678 | transmembrane protein                                                                |
| AT3G46110 | 0.018007396 | 5.037112  | UPSTREAM OF FLC-like protein (DUF966)                                                |
| AT3G13650 | 0.000111842 | 5.0194417 | Disease resistance-responsive (dirigent-like protein) family protein                 |
| AT1G13340 | 0.017985975 | 5.0015262 | Regulator of Vps4 activity in the MVB pathway protein                                |
| AT5G48380 | 0.015235519 | 5.0013235 | BAK1-interacting receptor-like kinase 1                                              |
| AT3G04640 | 0.025056022 | 4.9967754 | glycine-rich protein                                                                 |
| AT4G30210 | 0.022433077 | 4.9740109 | P450 reductase 2                                                                     |
| AT1G50740 | 0.022913337 | 4.9672536 | Transmembrane proteins 14C                                                           |
| AT3G09940 | 0.005499153 | 4.951116  | monodehydroascorbate reductase                                                       |
| AT2G28830 | 0.003568230 | 4.9456971 | armadillo/beta-catenin repeat protein                                                |
| AT1G76070 | 0.022727392 | 4.9422783 | hypothetical protein                                                                 |
| AT1G69900 | 0.015486539 | 4.9179134 | Actin cross-linking protein                                                          |
| AT3G11820 | 0.014611864 | 4.9065416 | syntaxin of plants 121                                                               |
| AT2G46940 | 0.015554079 | 4.8662408 | fold protein                                                                         |
| AT4G29740 | 0.013727897 | 4.84551   | cytokinin oxidase 4                                                                  |
| AT3G52430 | 0.000027356 | 4.8241054 | alpha/beta-Hydrolases superfamily protein                                            |
| AT3G16720 | 0.011819462 | 4.8008003 | TOXICOS EN LEVADURA 2                                                                |
| AT1G56140 | 0.009886797 | 4.7980931 | Leucine-rich repeat transmembrane protein kinase                                     |
| AT3G13435 | 0.005765897 | 4.790351  | transmembrane protein                                                                |
| AT4G27980 | 0.007973740 | 4.7809831 | trichohyalin-like protein (DUF3444)                                                  |
| AT1G06867 | 0.018126507 | 4.7751105 | NA                                                                                   |
| AT3G09405 | 0.038163593 | 4.7648204 | Pectinacetylerase family protein                                                     |
| AT4G12720 | 0.032592216 | 4.7528761 | MutT/nudix family protein                                                            |
| AT4G00970 | 0.000287843 | 4.7427007 | cysteine-rich RLK (RECEPTOR-like protein kinase) 41                                  |
| AT5G22690 | 0.048318933 | 4.7366647 | Disease resistance protein (TIR-NBS-LRR class) family                                |
| AT5G01881 | 0.009382212 | 4.7355745 | transmembrane protein                                                                |
| AT1G42990 | 0.012532585 | 4.72172   | basic region/leucine zipper motif 60                                                 |
| AT5G64660 | 0.006340683 | 4.7070921 | CYS%2C MET%2C PRO%2C and GLY protein 2                                               |
| AT1G14480 | 0.030661792 | 4.7047496 | Ankyrin repeat family protein                                                        |
| AT1G65690 | 0.004113638 | 4.6686346 | Late embryogenesis abundant (LEA) hydroxyproline-rich glycoprotein family            |
| AT3G59700 | 0.000058398 | 4.654639  | lectin-receptor kinase                                                               |

|           |             |           |                                                                        |
|-----------|-------------|-----------|------------------------------------------------------------------------|
| AT3G46090 | 0.027424895 | 4.6420717 | C2H2 and C2HC zinc fingers superfamily protein                         |
| AT4G19520 | 0.017048770 | 4.6346933 | disease resistance protein (TIR-NBS-LRR class) family                  |
| AT2G36220 | 0.019344542 | 4.6316867 | hypothetical protein                                                   |
| AT1G53980 | 0.002792426 | 4.6224444 | Ubiquitin-like superfamily protein                                     |
| AT1G30740 | 0.006579790 | 4.6085747 | FAD-binding Berberine family protein                                   |
| AT3G61280 | 0.014759537 | 4.6010272 | O-glucosyltransferase rumi-like protein (DUF821)                       |
| AT5G06775 | 0.030739758 | 4.582897  | NA                                                                     |
| AT4G16957 | 0.013934123 | 4.5631868 | SUPPRESSOR OF%2C CONSTITUTIVE protein                                  |
| AT5G61560 | 0.048569524 | 4.5625097 | U-box domain-containing protein kinase family protein                  |
| AT5G06230 | 0.049712513 | 4.562494  | TRICHOME BIREFRINGENCE-LIKE 9                                          |
| AT1G20823 | 0.006845159 | 4.5590004 | RING/U-box superfamily protein                                         |
| AT5G64310 | 0.013253048 | 4.5557536 | arabinogalactan protein 1                                              |
| AT4G11850 | 0.012749352 | 4.5544957 | phospholipase D gamma 1                                                |
| AT1G11050 | 0.002889989 | 4.5354117 | Protein kinase superfamily protein                                     |
| AT2G19130 | 0.010968625 | 4.5101153 | S-locus lectin protein kinase family protein                           |
| AT3G54420 | 0.000195973 | 4.4982047 | homolog of carrot EP3-3 chitinase                                      |
| AT5G66670 | 0.000170558 | 4.4889354 | pectinesterase%2C putative (DUF677)                                    |
| AT5G10410 | 0.005806274 | 4.4718902 | ENTH/ANTH/VHS superfamily protein                                      |
| AT1G33610 | 0.020319620 | 4.4686    | Leucine-rich repeat (LRR) family protein                               |
| AT3G44260 | 0.011638700 | 4.4659476 | Polynucleotidyl transferase%2C ribonuclease H-like superfamily protein |
| AT5G49520 | 0.000035011 | 4.4551932 | WRKY DNA-binding protein 48                                            |
| AT5G46520 | 0.013141472 | 4.4420482 | Disease resistance protein (TIR-NBS-LRR class) family                  |
| AT1G28380 | 0.013033625 | 4.4353993 | MAC/Perforin domain-containing protein                                 |
| AT5G66675 | 0.001818015 | 4.4249912 | transmembrane protein%2C putative (DUF677)                             |
| AT1G69890 | 0.029120912 | 4.4082858 | actin cross-linking protein (DUF569)                                   |
| AT3G57640 | 0.034556519 | 4.4056586 | Protein kinase superfamily protein                                     |
| AT4G01700 | 0.030158007 | 4.4049317 | Chitinase family protein                                               |
| AT3G13100 | 0.020057103 | 4.3960561 | multidrug resistance-associated protein 7                              |
| AT1G01480 | 0.045887850 | 4.3836803 | 1-amino-cyclopropane-1-carboxylate synthase 2                          |
| AT1G25390 | 0.013346557 | 4.3799335 | Protein kinase superfamily protein                                     |
| AT5G46500 | 0.035035578 | 4.3756463 | protein VARIATION IN COMPOUND TRIGGERED ROOT growth protein            |
| AT2G39210 | 0.018840416 | 4.3672814 | Major facilitator superfamily protein                                  |
| AT4G39570 | 0.039833472 | 4.3666455 | Galactose oxidase/kelch repeat superfamily protein                     |



|           |             |           |                                                                                             |
|-----------|-------------|-----------|---------------------------------------------------------------------------------------------|
| AT3G45650 | 0.014807105 | 4.3626276 | nitrate excretion transporter1                                                              |
| AT3G42883 | 0.034700278 | 4.3597325 | NA                                                                                          |
| AT2G28400 | 0.040828477 | 4.3507117 | senescence regulator (Protein of unknown function%2C DUF584)                                |
| AT1G29690 | 0.008357119 | 4.3311796 | MAC/Perforin domain-containing protein                                                      |
| AT3G13437 | 0.005985071 | 4.3265019 | transmembrane protein                                                                       |
| AT5G54860 | 0.023770565 | 4.2857134 | Major facilitator superfamily protein                                                       |
| AT5G39580 | 0.015625328 | 4.2837099 | Peroxidase superfamily protein                                                              |
| AT4G26120 | 0.000122399 | 4.2745652 | Ankyrin repeat family protein / BTB/POZ domain-containing protein                           |
| AT4G34390 | 0.023213554 | 4.270526  | extra-large GTP-binding protein 2                                                           |
| AT5G49770 | 0.036467717 | 4.2625795 | Leucine-rich repeat protein kinase family protein                                           |
| AT5G35580 | 0.000196584 | 4.2596882 | Protein kinase superfamily protein                                                          |
| AT5G67420 | 0.000721429 | 4.2464808 | LOB domain-containing protein 37                                                            |
| AT4G40080 | 0.021049683 | 4.2394222 | ENTH/ANTH/VHS superfamily protein                                                           |
| AT5G46910 | 0.028641606 | 4.2390276 | Transcription factor jumonji (jmj) family protein / zinc finger (C5HC2 type) family protein |
| AT4G34150 | 0.009867269 | 4.2383161 | Calcium-dependent lipid-binding (CaLB domain) family protein                                |
| AT3G50190 | 0.000263807 | 4.2326758 | transmembrane protein%2C putative (DUF247)                                                  |
| AT5G40170 | 0.000757840 | 4.2314651 | receptor like protein 54                                                                    |
| AT4G01250 | 0.018035717 | 4.228498  | WRKY family transcription factor                                                            |
| AT2G47130 | 0.000001488 | 4.227374  | NAD(P)-binding Rossmann-fold superfamily protein                                            |
| AT1G17240 | 0.015653577 | 4.2239434 | receptor like protein 2                                                                     |
| AT5G12880 | 0.037494161 | 4.2174439 | proline-rich family protein                                                                 |
| AT4G10990 | 0.021435991 | 4.215887  | NA                                                                                          |
| AT1G30730 | 0.014110020 | 4.2089427 | FAD-binding Berberine family protein                                                        |
| AT1G23710 | 0.035983944 | 4.1928068 | hypothetical protein (DUF1645)                                                              |
| AT3G12720 | 0.049321557 | 4.1905431 | myb domain protein 67                                                                       |
| AT4G18880 | 0.005131396 | 4.1880774 | heat shock transcription factor A4A                                                         |
| AT2G23320 | 0.012862270 | 4.187976  | WRKY DNA-binding protein 15                                                                 |
| AT1G61800 | 0.000562563 | 4.1878366 | glucose-6-phosphate/phosphate translocator 2                                                |
| AT1G72280 | 0.014521556 | 4.1800705 | endoplasmic reticulum oxidoreductins 1                                                      |
| AT5G64120 | 0.004309729 | 4.1777741 | Peroxidase superfamily protein                                                              |
| AT4G21840 | 0.029479205 | 4.1773814 | methionine sulfoxide reductase B8                                                           |
| AT2G33580 | 0.013583741 | 4.1739227 | Protein kinase superfamily protein                                                          |
| AT3G06890 | 0.008988873 | 4.1633247 | transmembrane protein                                                                       |

|           |             |           |                                                                     |
|-----------|-------------|-----------|---------------------------------------------------------------------|
| AT3G57450 | 0.046245245 | 4.1601675 | hypothetical protein                                                |
| AT1G67470 | 0.019704933 | 4.1268861 | Protein kinase superfamily protein                                  |
| AT1G16110 | 0.008825303 | 4.1130532 | wall associated kinase-like 6                                       |
| AT1G61370 | 0.000105879 | 4.1092582 | S-locus lectin protein kinase family protein                        |
| AT4G23030 | 0.041618572 | 4.0955747 | MATE efflux family protein                                          |
| AT4G04505 | 0.015297171 | 4.0845365 | NA                                                                  |
| AT3G08760 | 0.001865788 | 4.0697121 | Protein kinase superfamily protein                                  |
| AT1G50310 | 0.012118201 | 4.0566729 | sugar transporter 9                                                 |
| AT5G67080 | 0.036717172 | 4.0310742 | mitogen-activated protein kinase kinase kinase 19                   |
| AT5G42010 | 0.002413383 | 4.0297785 | Transducin/WD40 repeat-like superfamily protein                     |
| AT3G26980 | 0.036356814 | 4.0266767 | membrane-anchored ubiquitin-fold protein 4 precursor                |
| AT5G12930 | 0.014104046 | 4.0243697 | inactive rhomboid protein                                           |
| AT2G31990 | 0.025313950 | 4.0115909 | Exostosin family protein                                            |
| AT5G26030 | 0.006553103 | 4.0112942 | ferrochelatase 1                                                    |
| AT5G66620 | 0.024594150 | 3.9981414 | DA1-related protein 6                                               |
| AT3G13090 | 0.018800248 | 3.9953472 | multidrug resistance-associated protein 8                           |
| AT3G50950 | 0.011453885 | 3.9892609 | HOPZ-ACTIVATED RESISTANCE 1                                         |
| AT1G59590 | 0.029353996 | 3.9892427 | ZCF37                                                               |
| AT1G70140 | 0.023265710 | 3.988587  | formin 8                                                            |
| AT4G27970 | 0.027839092 | 3.9860661 | SLAC1 homologue 2                                                   |
| AT5G61010 | 0.001888990 | 3.9811372 | exocyst subunit exo70 family protein E2                             |
| AT1G15890 | 0.005307415 | 3.9776669 | Disease resistance protein (CC-NBS-LRR class) family                |
| AT1G64610 | 0.000109411 | 3.9754301 | Transducin/WD40 repeat-like superfamily protein                     |
| AT1G56540 | 0.023813574 | 3.9703446 | Disease resistance protein (TIR-NBS-LRR class) family               |
| AT4G23015 | 0.012736452 | 3.9672207 | transmembrane protein                                               |
| AT1G11310 | 0.012224071 | 3.9635259 | Seven transmembrane MLO family protein                              |
| AT1G21100 | 0.008222066 | 3.9517437 | O-methyltransferase family protein                                  |
| AT4G39030 | 0.004328571 | 3.9425592 | MATE efflux family protein                                          |
| AT1G09940 | 0.048836002 | 3.9287037 | Glutamyl-tRNA reductase family protein                              |
| AT1G23830 | 0.000943966 | 3.9257731 | transmembrane protein                                               |
| AT2G38870 | 0.020495345 | 3.9232989 | Serine protease inhibitor%2C potato inhibitor I-type family protein |
| AT2G32210 | 0.034109126 | 3.9164629 | cysteine-rich/transmembrane domain A-like protein                   |
| AT2G26410 | 0.011565424 | 3.9152417 | IQ-domain 4                                                         |

|           |             |           |                                                                                                 |
|-----------|-------------|-----------|-------------------------------------------------------------------------------------------------|
| AT1G59910 | 0.018603643 | 3.9141485 | Actin-binding FH2 (formin homology 2) family protein                                            |
| AT5G44063 | 0.027362963 | 3.9014283 | hypothetical protein                                                                            |
| AT1G65510 | 0.018742198 | 3.8947302 | transmembrane protein                                                                           |
| AT1G15190 | 0.038553059 | 3.8878956 | Fasciclin-like arabinogalactan family protein                                                   |
| AT1G16120 | 0.017060551 | 3.8851096 | wall associated kinase-like 1                                                                   |
| AT2G42350 | 0.002164130 | 3.8822637 | RING/U-box superfamily protein                                                                  |
| AT1G07620 | 0.004891887 | 3.8763994 | GTP-binding protein Obg/CgtA                                                                    |
| AT3G21630 | 0.002513280 | 3.8739796 | chitin elicitor receptor kinase 1                                                               |
| AT1G27770 | 0.014947229 | 3.8663966 | autoinhibited Ca <sup>2+</sup> -ATPase 1                                                        |
| AT3G51450 | 0.034057550 | 3.8655764 | Calcium-dependent phosphotriesterase superfamily protein                                        |
| AT2G07661 | 0.015341249 | 3.8653103 | hypothetical protein                                                                            |
| AT1G73010 | 0.012961546 | 3.8627963 | inorganic pyrophosphatase 1                                                                     |
| AT5G05190 | 0.011360579 | 3.8607753 | hypothetical protein (DUF3133)                                                                  |
| AT4G11300 | 0.014792933 | 3.8596611 | ROH1%2C putative (DUF793)                                                                       |
| AT3G01140 | 0.046841181 | 3.8561877 | myb domain protein 106                                                                          |
| AT5G44820 | 0.021673385 | 3.851325  | Nucleotide-diphospho-sugar transferase family protein                                           |
| AT1G53633 | 0.018914852 | 3.8439772 | hypothetical protein                                                                            |
| AT2G03530 | 0.004928458 | 3.8421553 | ureide permease 2                                                                               |
| AT1G19180 | 0.027110234 | 3.8263439 | jasmonate-zim-domain protein 1                                                                  |
| AT3G55950 | 0.020289932 | 3.7974332 | CRINKLY4 related 3                                                                              |
| AT5G59730 | 0.016310021 | 3.7902383 | exocyst subunit exo70 family protein H7                                                         |
| AT4G07165 | 0.043236779 | 3.7883011 | NA                                                                                              |
| AT3G10815 | 0.007476954 | 3.7824464 | RING/U-box superfamily protein                                                                  |
| AT4G18170 | 0.006054516 | 3.7723728 | WRKY DNA-binding protein 28                                                                     |
| AT5G03380 | 0.010836800 | 3.7684605 | Heavy metal transport/detoxification superfamily protein                                        |
| AT1G78860 | 0.014363824 | 3.7655762 | D-mannose binding lectin protein with Apple-like carbohydrate-binding domain-containing protein |
| AT3G18690 | 0.015038307 | 3.7525154 | MAP kinase substrate 1                                                                          |
| AT1G23840 | 0.001995977 | 3.749108  | transmembrane protein                                                                           |
| AT1G66880 | 0.000572470 | 3.7483465 | Protein kinase superfamily protein                                                              |
| AT3G47820 | 0.000558829 | 3.7386905 | PLANT U-BOX 39                                                                                  |
| AT5G39000 | 0.000696193 | 3.7187533 | Malectin/receptor-like protein kinase family protein                                            |
| AT1G03370 | 0.007759657 | 3.7141042 | C2 calcium/lipid-binding and GRAM domain containing protein                                     |
| AT2G46620 | 0.012940830 | 3.7049456 | P-loop containing nucleoside triphosphate hydrolases superfamily protein                        |

|           |             |           |                                                                |
|-----------|-------------|-----------|----------------------------------------------------------------|
| AT5G65300 | 0.024718127 | 3.6950869 | hypothetical protein                                           |
| AT5G36920 | 0.007658773 | 3.6943744 | transmembrane protein                                          |
| AT4G23130 | 0.002002591 | 3.670554  | cysteine-rich RLK (RECEPTOR-like protein kinase) 5             |
| AT3G50760 | 0.026164171 | 3.6686544 | galacturonosyltransferase-like 2                               |
| AT1G03220 | 0.013638877 | 3.6574749 | Eukaryotic aspartyl protease family protein                    |
| AT1G59865 | 0.028545082 | 3.6530435 | transmembrane protein                                          |
| AT3G47570 | 0.001170984 | 3.6475321 | Leucine-rich repeat protein kinase family protein              |
| AT3G16860 | 0.029301590 | 3.6364134 | COBRA-like protein 8 precursor                                 |
| AT5G52830 | 0.003358105 | 3.6353167 | WRKY DNA-binding protein 27                                    |
| AT1G63750 | 0.002031567 | 3.6314788 | Disease resistance protein (TIR-NBS-LRR class) family          |
| AT5G11920 | 0.004682260 | 3.6089569 | 6-%261-fructan exohydrolase                                    |
| AT4G12120 | 0.025726986 | 3.5990106 | Sec1/munc18-like (SM) proteins superfamily                     |
| AT1G72960 | 0.039597776 | 3.5978175 | Root hair defective 3 GTP-binding protein (RHD3)               |
| AT4G29050 | 0.003192210 | 3.5977495 | Concanavalin A-like lectin protein kinase family protein       |
| AT3G08710 | 0.009989930 | 3.5935078 | thioredoxin H-type 9                                           |
| AT3G08870 | 0.001419118 | 3.5918495 | Concanavalin A-like lectin protein kinase family protein       |
| AT2G07825 | 0.037004660 | 3.5760376 | hypothetical protein                                           |
| AT1G67800 | 0.000952058 | 3.5709688 | Copine (Calcium-dependent phospholipid-binding protein) family |
| AT5G66070 | 0.033057071 | 3.560473  | RING/U-box superfamily protein                                 |
| AT2G35000 | 0.014831318 | 3.5589847 | RING/U-box superfamily protein                                 |
| AT1G13530 | 0.003730549 | 3.5579727 | hypothetical protein (DUF1262)                                 |
| AT2G31230 | 0.008398540 | 3.5444823 | ethylene-responsive element binding factor 15                  |
| AT1G53990 | 0.000525252 | 3.5435748 | GDSL-motif lipase 3                                            |
| AT5G07390 | 0.001064704 | 3.5329156 | respiratory burst oxidase homolog A                            |
| AT4G18430 | 0.020818221 | 3.532416  | RAB GTPase homolog A1E                                         |
| AT2G31945 | 0.025288177 | 3.5263183 | transmembrane protein                                          |
| AT5G52320 | 0.046790464 | 3.5166016 | cytochrome P450%2C family 96%2C subfamily A%2C polypeptide 4   |
| AT5G23000 | 0.000655099 | 3.5062265 | myb domain protein 37                                          |
| AT5G46510 | 0.015167199 | 3.502302  | Disease resistance protein (TIR-NBS-LRR class) family          |
| AT5G02290 | 0.011081671 | 3.4998063 | Protein kinase superfamily protein                             |
| AT1G30420 | 0.012943222 | 3.4966565 | multidrug resistance-associated protein 12                     |
| AT1G27020 | 0.015156714 | 3.495528  | plant/protein                                                  |
| AT1G14370 | 0.008242494 | 3.494642  | protein kinase 2A                                              |

|           |             |           |                                                                                |
|-----------|-------------|-----------|--------------------------------------------------------------------------------|
| AT1G16670 | 0.014083531 | 3.4742102 | Protein kinase superfamily protein                                             |
| AT4G22470 | 0.009113359 | 3.4690641 | protease inhibitor/seed storage/lipid transfer protein (LTP) family protein    |
| AT3G59080 | 0.006298129 | 3.4598809 | Eukaryotic aspartyl protease family protein                                    |
| AT1G61420 | 0.019074009 | 3.4598656 | S-locus lectin protein kinase family protein                                   |
| AT5G08790 | 0.006032413 | 3.4507861 | NAC (No Apical Meristem) domain transcriptional regulator superfamily protein  |
| AT2G44340 | 0.023841058 | 3.4501258 | VQ motif-containing protein                                                    |
| AT5G52200 | 0.003913226 | 3.449517  | phosphoprotein phosphatase inhibitor                                           |
| AT2G02310 | 0.048390150 | 3.44873   | phloem protein 2-B6                                                            |
| AT1G03920 | 0.033384077 | 3.4438303 | Protein kinase family protein                                                  |
| AT3G46080 | 0.000987466 | 3.4418083 | C2H2-type zinc finger family protein                                           |
| AT4G01950 | 0.001529995 | 3.4417698 | glycerol-3-phosphate acyltransferase 3                                         |
| AT2G24570 | 0.002893305 | 3.4385546 | WRKY DNA-binding protein 17                                                    |
| AT2G30750 | 0.028785483 | 3.4384509 | cytochrome P450 family 71 polypeptide                                          |
| AT2G41100 | 0.010249349 | 3.4326015 | Calcium-binding EF hand family protein                                         |
| AT1G51790 | 0.000247747 | 3.4301625 | Leucine-rich repeat protein kinase family protein                              |
| AT1G03740 | 0.015860472 | 3.4088547 | Protein kinase superfamily protein                                             |
| AT1G19415 | 0.020868003 | 3.3889452 | NA                                                                             |
| AT2G15480 | 0.003923461 | 3.3850674 | UDP-glucosyl transferase 73B5                                                  |
| AT1G66160 | 0.005820002 | 3.3696006 | CYS%2C MET%2C PRO%2C and GLY protein 1                                         |
| AT2G36690 | 0.014334913 | 3.3681061 | 2-oxoglutarate (2OG) and Fe(II)-dependent oxygenase superfamily protein        |
| AT2G47060 | 0.012040988 | 3.3612823 | Protein kinase superfamily protein                                             |
| AT2G36770 | 0.003166198 | 3.3591447 | UDP-Glycosyltransferase superfamily protein                                    |
| AT2G41880 | 0.042162640 | 3.3470147 | guanylate kinase 1                                                             |
| AT5G44900 | 0.043832546 | 3.3373346 | Toll-Interleukin-Resistance (TIR) domain family protein                        |
| AT4G23270 | 0.002449863 | 3.3372373 | cysteine-rich RLK (RECEPTOR-like protein kinase) 19                            |
| AT4G17615 | 0.016918670 | 3.3356649 | calcineurin B-like protein 1                                                   |
| AT3G13020 | 0.013556182 | 3.3263308 | hAT transposon superfamily protein                                             |
| AT2G32240 | 0.037413986 | 3.3255121 | early endosome antigen                                                         |
| AT5G53990 | 0.031889710 | 3.3211185 | UDP-Glycosyltransferase superfamily protein                                    |
| AT1G74330 | 0.016001526 | 3.3207948 | Protein kinase superfamily protein                                             |
| AT4G02330 | 0.000210679 | 3.3196731 | Plant invertase/pectin methylesterase inhibitor superfamily                    |
| AT5G06320 | 0.011624274 | 3.3183789 | NDR1/HIN1-like 3                                                               |
| AT2G22890 | 0.032906401 | 3.3051401 | Kua-ubiquitin conjugating enzyme hybrid localization domain-containing protein |

|           |             |           |                                                                          |
|-----------|-------------|-----------|--------------------------------------------------------------------------|
| AT3G46280 | 0.017468898 | 3.3012585 | kinase-like protein                                                      |
| AT5G44582 | 0.019240182 | 3.2978627 | hypothetical protein                                                     |
| AT5G13210 | 0.033258129 | 3.2886071 | Uncharacterized conserved protein UCP015417%2C vWA                       |
| AT1G58561 | 0.000068842 | 3.2809287 | NA                                                                       |
| AT1G56510 | 0.018652260 | 3.2693357 | Disease resistance protein (TIR-NBS-LRR class)                           |
| AT5G46350 | 0.009589942 | 3.2541669 | WRKY DNA-binding protein 8                                               |
| AT4G14220 | 0.000301073 | 3.2461981 | RING-H2 group F1A                                                        |
| AT1G08930 | 0.007822532 | 3.2371376 | Major facilitator superfamily protein                                    |
| AT1G19770 | 0.019260148 | 3.2370569 | purine permease 14                                                       |
| AT1G64710 | 0.002482593 | 3.2353005 | GroES-like zinc-binding alcohol dehydrogenase family protein             |
| AT2G41380 | 0.000638293 | 3.2255441 | S-adenosyl-L-methionine-dependent methyltransferases superfamily protein |
| AT3G51920 | 0.002696275 | 3.2134471 | calmodulin 9                                                             |
| AT1G17750 | 0.027139260 | 3.2130079 | PEP1 receptor 2                                                          |
| AT2G07644 | 0.048682973 | 3.2113063 | hypothetical protein                                                     |
| AT1G30620 | 0.013816819 | 3.2086559 | NAD(P)-binding Rossmann-fold superfamily protein                         |
| AT1G08050 | 0.027254238 | 3.2041199 | Zinc finger (C3HC4-type RING finger) family protein                      |
| AT5G42440 | 0.004004561 | 3.1986598 | Protein kinase superfamily protein                                       |
| AT1G19380 | 0.010184461 | 3.1919845 | sugar%2C putative (DUF1195)                                              |
| AT2G47550 | 0.014617996 | 3.1897188 | Plant invertase/pectin methylesterase inhibitor superfamily              |
| AT1G70530 | 0.001407442 | 3.1884479 | cysteine-rich RLK (RECEPTOR-like protein kinase) 3                       |
| AT3G23010 | 0.048689348 | 3.1808623 | receptor like protein 36                                                 |
| AT5G24240 | 0.000478313 | 3.1805585 | phosphatidylinositol 4-kinase gamma-like protein                         |
| AT5G18470 | 0.002624274 | 3.1803855 | Curculin-like (mannose-binding) lectin family protein                    |
| AT3G63350 | 0.000794651 | 3.1782358 | winged-helix DNA-binding transcription factor family protein             |
| AT1G64010 | 0.000111250 | 3.1762426 | Serine protease inhibitor (SERPIN) family protein                        |
| AT5G44060 | 0.023329458 | 3.1693563 | embryo sac development arrest protein                                    |
| AT1G63720 | 0.003563146 | 3.1642542 | hydroxyproline-rich glycoprotein family protein                          |
| AT3G50470 | 0.022229695 | 3.163556  | homolog of RPW8 3                                                        |
| AT1G65845 | 0.030961175 | 3.1630671 | transmembrane protein                                                    |
| AT4G04700 | 0.012183034 | 3.1536116 | calcium-dependent protein kinase 27                                      |
| AT2G02380 | 0.035116416 | 3.1523014 | glutathione S-transferase (class zeta) 2                                 |
| AT2G17120 | 0.012061273 | 3.1476029 | lysm domain GPI-anchored protein 2 precursor                             |
| AT1G34420 | 0.001396886 | 3.1439434 | leucine-rich repeat transmembrane protein kinase family protein          |

|           |             |           |                                                                                                 |
|-----------|-------------|-----------|-------------------------------------------------------------------------------------------------|
| AT5G38212 | 0.005542884 | 3.136002  | NA                                                                                              |
| AT1G78850 | 0.014312114 | 3.1302437 | D-mannose binding lectin protein with Apple-like carbohydrate-binding domain-containing protein |
| AT3G22060 | 0.021316759 | 3.1299623 | Receptor-like protein kinase-related family protein                                             |
| AT4G24160 | 0.024656932 | 3.1279868 | alpha/beta-Hydrolases superfamily protein                                                       |
| AT4G34180 | 0.009383088 | 3.125875  | Cyclase family protein                                                                          |
| AT1G72940 | 0.002388067 | 3.1124943 | Toll-Interleukin-Resistance (TIR) domain-containing protein                                     |
| AT3G28210 | 0.002504269 | 3.1042136 | zinc finger (AN1-like) family protein                                                           |
| AT1G51670 | 0.031674077 | 3.1016206 | hypothetical protein                                                                            |
| AT5G66310 | 0.005768036 | 3.1009168 | ATP binding microtubule motor family protein                                                    |
| AT4G29770 | 0.035848175 | 3.0930991 | target of trans acting-siR480/255 protein                                                       |
| AT5G40540 | 0.020954951 | 3.0914694 | Protein kinase superfamily protein                                                              |
| AT3G57210 | 0.048910096 | 3.087617  | hypothetical protein                                                                            |
| AT2G47190 | 0.016801171 | 3.0865514 | myb domain protein 2                                                                            |
| AT1G72910 | 0.015561200 | 3.0697379 | Toll-Interleukin-Resistance (TIR) domain-containing protein                                     |
| AT4G11230 | 0.039228484 | 3.0690038 | Riboflavin synthase-like superfamily protein                                                    |
| AT1G05000 | 0.012406643 | 3.0653381 | Phosphotyrosine protein phosphatases superfamily protein                                        |
| AT5G59550 | 0.024638313 | 3.0518975 | zinc finger (C3HC4-type RING finger) family protein                                             |
| AT3G45660 | 0.009777852 | 3.0518302 | Major facilitator superfamily protein                                                           |
| AT3G06490 | 0.024210645 | 3.0467895 | myb domain protein 108                                                                          |
| AT3G49530 | 0.001850885 | 3.0454821 | NAC domain containing protein 62                                                                |
| AT5G66650 | 0.043331775 | 3.0384504 | calcium uniporter (DUF607)                                                                      |
| AT4G02200 | 0.018423402 | 3.0378041 | Drought-responsive family protein                                                               |
| AT4G38545 | 0.031917234 | 3.0354056 | NA                                                                                              |
| AT4G36550 | 0.001380143 | 3.021784  | ARM repeat superfamily protein                                                                  |
| AT4G14610 | 0.002114096 | 3.0211017 | NA                                                                                              |
| AT4G23250 | 0.041454446 | 3.0063622 | cysteine-rich receptor-like protein kinase 17                                                   |
| AT2G04500 | 0.006723240 | 3.00625   | Cysteine/Histidine-rich C1 domain family protein                                                |
| AT3G28340 | 0.011809205 | 3.0050169 | galacturonosyltransferase-like 10                                                               |
| AT1G65486 | 0.022366432 | 3.002708  | transmembrane protein                                                                           |
| AT5G57035 | 0.022868099 | 3.001761  | U-box domain-containing protein kinase family protein                                           |
| AT2G23810 | 0.001838018 | 2.9995967 | tetraspanin8                                                                                    |
| AT1G71697 | 0.019350709 | 2.9973714 | choline kinase 1                                                                                |
| AT2G44380 | 0.000654123 | 2.9889649 | Cysteine/Histidine-rich C1 domain family protein                                                |

|           |             |           |                                                                          |
|-----------|-------------|-----------|--------------------------------------------------------------------------|
| AT5G61210 | 0.016980066 | 2.9860418 | soluble N-ethylmaleimide-sensitive factor adaptor protein 33             |
| AT2G07715 | 0.039879507 | 2.981147  | Nucleic acid-binding%2C OB-fold-like protein                             |
| AT4G11330 | 0.003200783 | 2.9810552 | MAP kinase 5                                                             |
| AT3G62780 | 0.049217713 | 2.9800063 | Calcium-dependent lipid-binding (CaLB domain) family protein             |
| AT1G66500 | 0.006502991 | 2.979618  | Pre-mRNA cleavage complex II                                             |
| AT3G26680 | 0.002431119 | 2.9760051 | DNA repair metallo-beta-lactamase family protein                         |
| AT1G74080 | 0.013475329 | 2.9748573 | myb domain protein 122                                                   |
| AT4G13395 | 0.046721421 | 2.9653446 | ROTUNDIFOLIA like 12                                                     |
| AT1G72930 | 0.001928502 | 2.9549795 | toll/interleukin-1 receptor-like protein                                 |
| AT5G59820 | 0.021713590 | 2.9523093 | C2H2-type zinc finger family protein                                     |
| AT1G79245 | 0.005339571 | 2.9461785 | NA                                                                       |
| AT3G47540 | 0.015563491 | 2.936204  | Chitinase family protein                                                 |
| AT5G01950 | 0.016480964 | 2.9306773 | Leucine-rich repeat protein kinase family protein                        |
| AT1G53430 | 0.000741474 | 2.9235301 | Leucine-rich repeat transmembrane protein kinase                         |
| AT1G18860 | 0.019352284 | 2.9203872 | WRKY DNA-binding protein 61                                              |
| AT3G21080 | 0.003750506 | 2.9197454 | ABC transporter-like protein                                             |
| AT4G24110 | 0.015662625 | 2.9164641 | NADP-specific glutamate dehydrogenase                                    |
| AT1G76600 | 0.026017210 | 2.9149337 | poly polymerase                                                          |
| AT2G18150 | 0.009669967 | 2.907734  | Peroxidase superfamily protein                                           |
| AT4G25900 | 0.001135680 | 2.8865196 | Galactose mutarotase-like superfamily protein                            |
| AT5G38990 | 0.019955043 | 2.8835762 | Malectin/receptor-like protein kinase family protein                     |
| AT3G01513 | 0.013376274 | 2.882072  | hypothetical protein                                                     |
| AT5G40460 | 0.017796941 | 2.8773407 | cyclin-dependent kinase inhibitor SMR3-like protein                      |
| AT1G22280 | 0.015853592 | 2.8716447 | phytochrome-associated protein phosphatase type 2C                       |
| AT1G03230 | 0.025224185 | 2.8629198 | Eukaryotic aspartyl protease family protein                              |
| AT5G60320 | 0.002723868 | 2.860754  | Concanavalin A-like lectin protein kinase family protein                 |
| AT1G30720 | 0.002244839 | 2.8598357 | FAD-binding Berberine family protein                                     |
| AT3G45080 | 0.042106573 | 2.8543643 | P-loop containing nucleoside triphosphate hydrolases superfamily protein |
| AT5G13190 | 0.034504334 | 2.8474508 | GSH-induced LITAF domain protein                                         |
| AT5G03210 | 0.024682048 | 2.8429136 | E3 ubiquitin-protein ligase                                              |
| AT2G41730 | 0.030646968 | 2.835696  | calcium-binding site protein                                             |
| AT5G08240 | 0.010540535 | 2.832766  | transmembrane protein                                                    |
| AT4G33040 | 0.047327963 | 2.8324862 | Thioredoxin superfamily protein                                          |



|           |             |           |                                                                                           |
|-----------|-------------|-----------|-------------------------------------------------------------------------------------------|
| AT3G09032 | 0.041726324 | 2.8314875 | josephin-like protein                                                                     |
| AT4G20860 | 0.006690582 | 2.8262253 | FAD-binding Berberine family protein                                                      |
| AT3G20600 | 0.011396496 | 2.8223465 | Late embryogenesis abundant (LEA) hydroxyproline-rich glycoprotein family                 |
| AT1G10340 | 0.044903440 | 2.8217203 | Ankyrin repeat family protein                                                             |
| AT4G23210 | 0.004756118 | 2.8148596 | cysteine-rich RLK (RECEPTOR-like protein kinase) 13                                       |
| AT3G45330 | 0.035252710 | 2.8142364 | Concanavalin A-like lectin protein kinase family protein                                  |
| AT5G10695 | 0.010684804 | 2.8123572 | methionyl-tRNA synthetase                                                                 |
| AT5G58430 | 0.008911689 | 2.8111375 | exocyst subunit exo70 family protein B1                                                   |
| AT4G11500 | 0.010896496 | 2.8055213 | NA                                                                                        |
| AT1G72540 | 0.010584987 | 2.8034745 | Protein kinase superfamily protein                                                        |
| AT2G15760 | 0.014667428 | 2.8034102 | calmodulin-binding protein (DUF1645)                                                      |
| AT1G23560 | 0.008871865 | 2.8031925 | OBP32pep%2C putative (DUF220)                                                             |
| AT5G46470 | 0.002522190 | 2.8011593 | disease resistance protein (TIR-NBS-LRR class) family                                     |
| AT1G09950 | 0.044256965 | 2.7960096 | RESPONSE TO ABA AND SALT 1                                                                |
| AT4G22610 | 0.045841458 | 2.7905351 | Bifunctional inhibitor/lipid-transfer protein/seed storage 2S albumin superfamily protein |
| AT5G39970 | 0.031772676 | 2.7904108 | catalytics                                                                                |
| AT5G41180 | 0.014270848 | 2.7839721 | leucine-rich repeat transmembrane protein kinase family protein                           |
| AT1G66480 | 0.000489063 | 2.7811743 | plastid movement impaired 2                                                               |
| AT1G59620 | 0.005869392 | 2.7781041 | Disease resistance protein (CC-NBS-LRR class) family                                      |
| AT3G59880 | 0.011477092 | 2.7728174 | hypothetical protein                                                                      |
| AT3G50900 | 0.002989835 | 2.7586688 | hypothetical protein                                                                      |
| AT3G25600 | 0.002332695 | 2.7571266 | Calcium-binding EF-hand family protein                                                    |
| AT4G25390 | 0.017860801 | 2.7556897 | Protein kinase superfamily protein                                                        |
| AT5G11670 | 0.006993786 | 2.7485091 | NADP-malic enzyme 2                                                                       |
| AT1G51860 | 0.006449741 | 2.7479545 | Leucine-rich repeat protein kinase family protein                                         |
| AT4G28703 | 0.003967636 | 2.744883  | RmlC-like cupins superfamily protein                                                      |
| AT5G11650 | 0.010649866 | 2.7432921 | alpha/beta-Hydrolases superfamily protein                                                 |
| AT1G18300 | 0.037808535 | 2.7393568 | nudix hydrolase homolog 4                                                                 |
| AT1G75000 | 0.024280873 | 2.7363645 | GNS1/SUR4 membrane protein family                                                         |
| AT5G55560 | 0.018851699 | 2.733013  | Protein kinase superfamily protein                                                        |
| AT4G17900 | 0.012368240 | 2.7280909 | PLATZ transcription factor family protein                                                 |
| AT3G25510 | 0.002308289 | 2.7277113 | disease resistance protein (TIR-NBS-LRR class) family protein                             |
| AT1G51660 | 0.029521757 | 2.7263387 | mitogen-activated protein kinase kinase 4                                                 |

|           |             |           |                                                             |
|-----------|-------------|-----------|-------------------------------------------------------------|
| AT1G73080 | 0.021932099 | 2.7250745 | PEP1 receptor 1                                             |
| AT5G11970 | 0.036279396 | 2.7244204 | ABC family ABC transporter%2C putative (DUF3511)            |
| AT5G02630 | 0.008104098 | 2.7132637 | Lung seven transmembrane receptor family protein            |
| AT2G41835 | 0.008883363 | 2.7099782 | zinc finger (C2H2 type%2C AN1-like) family protein          |
| AT4G39230 | 0.026022157 | 2.702085  | NmrA-like negative transcriptional regulator family protein |
| AT3G50480 | 0.007081537 | 2.7009325 | homolog of RPW8 4                                           |
| AT2G02860 | 0.002965752 | 2.6963814 | sucrose transporter 2                                       |
| AT5G64750 | 0.031790353 | 2.6928853 | Integrase-type DNA-binding superfamily protein              |
| AT2G41010 | 0.006509422 | 2.6918569 | calmodulin (CAM)-binding protein of 25 kDa                  |
| AT5G01935 | 0.040321662 | 2.6894442 | NA                                                          |
| AT3G12040 | 0.011636380 | 2.6893333 | DNA-3-methyladenine glycosylase (MAG)                       |
| AT5G54850 | 0.038877293 | 2.6860845 | hexon                                                       |
| AT5G20480 | 0.003035782 | 2.6719758 | EF-TU receptor                                              |
| AT4G29570 | 0.045438382 | 2.6713036 | Cytidine/deoxycytidylate deaminase family protein           |
| AT1G80610 | 0.005601313 | 2.6605242 | hypothetical protein                                        |
| AT4G24380 | 0.028966630 | 2.6474603 | dihydrofolate reductase                                     |
| AT5G44480 | 0.024804205 | 2.643048  | NAD(P)-binding Rossmann-fold superfamily protein            |
| AT1G58410 | 0.000235280 | 2.6428189 | Disease resistance protein (CC-NBS-LRR class) family        |
| AT1G68340 | 0.028487402 | 2.6423083 | hypothetical protein (DUF1639)                              |
| AT2G17220 | 0.023360614 | 2.6419548 | Protein kinase superfamily protein                          |
| AT1G63830 | 0.002970194 | 2.6414908 | PLAC8 family protein                                        |
| AT4G38540 | 0.000707322 | 2.6365591 | FAD/NAD(P)-binding oxidoreductase family protein            |
| AT1G72950 | 0.025151734 | 2.6361911 | Disease resistance protein (TIR-NBS class)                  |
| AT3G29034 | 0.016027024 | 2.6345184 | transmembrane protein                                       |
| AT1G80450 | 0.041373691 | 2.6320455 | VQ motif-containing protein                                 |
| AT5G40920 | 0.000160775 | 2.6277529 | NA                                                          |
| AT3G03020 | 0.046148517 | 2.6274364 | hypothetical protein                                        |
| AT3G52800 | 0.001670032 | 2.6271282 | A20/AN1-like zinc finger family protein                     |
| AT2G17705 | 0.012004644 | 2.6175532 | methionine-S-oxide reductase                                |
| AT3G44630 | 0.006609318 | 2.6173598 | Disease resistance protein (TIR-NBS-LRR class) family       |
| AT3G55090 | 0.009068709 | 2.6130887 | ABC-2 type transporter family protein                       |
| AT3G50140 | 0.000357899 | 2.6129792 | transmembrane protein%2C putative (DUF247)                  |
| AT3G03855 | 0.002627845 | 2.6128717 | NA                                                          |

|           |             |           |                                                                                                 |
|-----------|-------------|-----------|-------------------------------------------------------------------------------------------------|
| AT1G69810 | 0.002338456 | 2.605967  | WRKY DNA-binding protein 36                                                                     |
| AT3G15210 | 0.009071542 | 2.6049369 | ethylene responsive element binding factor 4                                                    |
| AT3G50460 | 0.019619153 | 2.6034609 | homolog of RPW8 2                                                                               |
| AT3G13430 | 0.048989914 | 2.598954  | RING/U-box superfamily protein                                                                  |
| AT1G31540 | 0.004696860 | 2.5986846 | Disease resistance protein (TIR-NBS-LRR class) family                                           |
| AT5G59270 | 0.005689885 | 2.5972251 | Concanavalin A-like lectin protein kinase family protein                                        |
| AT5G66480 | 0.030589563 | 2.5970144 | bacteriophage N4 adsorption B protein                                                           |
| AT4G23200 | 0.015556749 | 2.5940489 | cysteine-rich RLK (RECEPTOR-like protein kinase) 12                                             |
| AT1G70740 | 0.012277324 | 2.5935506 | Protein kinase superfamily protein                                                              |
| AT5G01640 | 0.004397273 | 2.5879185 | prenylated RAB acceptor 1.B5                                                                    |
| AT5G62570 | 0.016861960 | 2.5854835 | Calmodulin binding protein-like protein                                                         |
| AT5G66630 | 0.030214264 | 2.5849576 | DA1-related protein 5                                                                           |
| AT5G41835 | 0.032890364 | 2.5821516 | NA                                                                                              |
| AT4G37030 | 0.021627308 | 2.581325  | membrane protein                                                                                |
| AT3G28940 | 0.003431421 | 2.5790558 | AlG2-like (avirulence induced gene) family protein                                              |
| AT3G25900 | 0.046291631 | 2.5753181 | Homocysteine S-methyltransferase family protein                                                 |
| AT1G20515 | 0.037599332 | 2.5747152 | NA                                                                                              |
| AT2G16870 | 0.036273134 | 2.5718406 | Disease resistance protein (TIR-NBS-LRR class) family                                           |
| AT5G20230 | 0.001416862 | 2.571025  | blue-copper-binding protein                                                                     |
| AT3G55450 | 0.001279556 | 2.5699324 | PBS1-like 1                                                                                     |
| AT5G64530 | 0.010416937 | 2.5696132 | xylem NAC domain 1                                                                              |
| AT5G25170 | 0.027736246 | 2.5693408 | PPPDE putative thiol peptidase family protein                                                   |
| AT3G57760 | 0.021518150 | 2.5691656 | Protein kinase superfamily protein                                                              |
| AT4G02380 | 0.010725316 | 2.5653724 | senescence-associated gene 21                                                                   |
| AT3G12740 | 0.008630707 | 2.5580352 | ALA-interacting subunit 1                                                                       |
| AT3G44400 | 0.008190057 | 2.5561145 | Disease resistance protein (TIR-NBS-LRR class) family                                           |
| AT5G03700 | 0.005549342 | 2.5484884 | D-mannose binding lectin protein with Apple-like carbohydrate-binding domain-containing protein |
| AT3G57550 | 0.005726381 | 2.540241  | guanylate kinase                                                                                |
| AT5G44575 | 0.001918224 | 2.53978   | hypothetical protein                                                                            |
| AT3G53810 | 0.001741217 | 2.5389983 | Concanavalin A-like lectin protein kinase family protein                                        |
| AT1G15530 | 0.032119584 | 2.537334  | Concanavalin A-like lectin protein kinase family protein                                        |
| AT1G77500 | 0.016699897 | 2.5357001 | DUF630 family protein%2C putative (DUF630 and DUF632)                                           |
| AT3G49350 | 0.000062795 | 2.5335788 | Ypt/Rab-GAP domain of gyp1p superfamily protein                                                 |

|           |             |           |                                                                              |
|-----------|-------------|-----------|------------------------------------------------------------------------------|
| AT3G09870 | 0.026130202 | 2.5305153 | SAUR-like auxin-responsive protein family                                    |
| AT4G18890 | 0.037744911 | 2.5217952 | BES1/BZR1 homolog 3                                                          |
| AT5G19230 | 0.001611039 | 2.5174902 | Glycoprotein membrane precursor GPI-anchored                                 |
| AT4G04490 | 0.006693802 | 2.5173742 | cysteine-rich RLK (RECEPTOR-like protein kinase) 36                          |
| AT5G16170 | 0.020185313 | 2.5152446 | Core-2/I-branching beta-1%2C6-N-acetylglucosaminyltransferase family protein |
| AT1G75860 | 0.048811509 | 2.5141281 | DNA ligase                                                                   |
| AT1G53440 | 0.005393561 | 2.5109465 | Leucine-rich repeat transmembrane protein kinase                             |
| AT2G46750 | 0.007136448 | 2.5073562 | D-arabinono-1%2C4-lactone oxidase family protein                             |
| AT1G21010 | 0.038911557 | 2.5056893 | poly polymerase                                                              |
| AT3G60415 | 0.025074269 | 2.5037308 | phosphoglycerate mutase family protein                                       |
| AT2G41082 | 0.011131976 | 2.5022929 | hypothetical protein                                                         |
| AT5G04870 | 0.004184001 | 2.5007843 | calcium dependent protein kinase 1                                           |
| AT5G46330 | 0.003476942 | 2.49867   | Leucine-rich receptor-like protein kinase family protein                     |
| AT2G39660 | 0.006709539 | 2.4981652 | botrytis-induced kinase1                                                     |
| AT5G62070 | 0.002607138 | 2.4948645 | IQ-domain 23                                                                 |
| AT1G76700 | 0.005432792 | 2.4932679 | DNAJ heat shock N-terminal domain-containing protein                         |
| AT1G03730 | 0.012546369 | 2.4902911 | pyrroline-5-carboxylate reductase                                            |
| AT4G14680 | 0.030614468 | 2.4872479 | Pseudouridine synthase/archaeosine transglycosylase-like family protein      |
| AT4G33060 | 0.022249828 | 2.4835583 | Cyclophilin-like peptidyl-prolyl cis-trans isomerase family protein          |
| AT3G59310 | 0.005447591 | 2.4829939 | solute carrier family 35 protein (DUF914)                                    |
| AT4G01740 | 0.003995537 | 2.4815129 | Cysteine/Histidine-rich C1 domain family protein                             |
| AT2G13900 | 0.009142728 | 2.480479  | Cysteine/Histidine-rich C1 domain family protein                             |
| AT2G46160 | 0.008076219 | 2.4792123 | RING/U-box superfamily protein                                               |
| AT2G28940 | 0.025009729 | 2.478774  | Protein kinase superfamily protein                                           |
| AT4G01090 | 0.011109185 | 2.4744052 | hypothetical protein (DUF3133)                                               |
| AT5G47220 | 0.009292996 | 2.4736888 | ethylene responsive element binding factor 2                                 |
| AT1G70520 | 0.007245235 | 2.4732921 | cysteine-rich RLK (RECEPTOR-like protein kinase) 2                           |
| AT2G19710 | 0.018358407 | 2.4726974 | Regulator of Vps4 activity in the MVB pathway protein                        |
| AT3G26210 | 0.016888883 | 2.4714621 | cytochrome P450%2C family 71%2C subfamily B%2C polypeptide 23                |
| AT1G35710 | 0.042810072 | 2.4681278 | kinase family with leucine-rich repeat domain-containing protein             |
| AT1G69840 | 0.011170783 | 2.4659964 | SPFH/Band 7/PHB domain-containing membrane-associated protein family         |
| AT1G67060 | 0.006932643 | 2.4590444 | peptidase M50B-like protein                                                  |
| AT4G23010 | 0.003651607 | 2.4567229 | UDP-galactose transporter 2                                                  |

|           |             |           |                                                                            |
|-----------|-------------|-----------|----------------------------------------------------------------------------|
| AT4G22980 | 0.000912668 | 2.4532632 | molybdenum cofactor sulfurase-like protein                                 |
| AT1G55920 | 0.005698522 | 2.4495681 | serine acetyltransferase 2%3B1                                             |
| AT4G34460 | 0.022546381 | 2.4400462 | GTP binding protein beta 1                                                 |
| AT1G63740 | 0.018262689 | 2.435703  | Disease resistance protein (TIR-NBS-LRR class) family                      |
| AT4G24970 | 0.013739700 | 2.4317627 | Histidine kinase-%2C DNA gyrase B-%2C and HSP90-like ATPase family protein |
| AT2G30020 | 0.000681193 | 2.4310426 | Protein phosphatase 2C family protein                                      |
| AT2G40000 | 0.010460035 | 2.4250885 | ortholog of sugar beet HS1 PRO-1 2                                         |
| AT5G42050 | 0.008175576 | 2.4194597 | DCD (Development and Cell Death) domain protein                            |
| AT5G55090 | 0.004244206 | 2.4186653 | mitogen-activated protein kinase kinase kinase 15                          |
| AT4G32300 | 0.005554152 | 2.4176044 | S-domain-2 5                                                               |
| AT2G32190 | 0.021022495 | 2.4172399 | cysteine-rich/transmembrane domain A-like protein                          |
| AT2G39420 | 0.004670622 | 2.4160747 | alpha/beta-Hydrolases superfamily protein                                  |
| AT1G13510 | 0.015000998 | 2.4136744 | hypothetical protein (DUF1262)                                             |
| AT5G44870 | 0.032421365 | 2.4113677 | Disease resistance protein (TIR-NBS-LRR class) family                      |
| AT1G20350 | 0.002248871 | 2.4093034 | translocase inner membrane subunit 17-1                                    |
| AT3G46620 | 0.035588056 | 2.4035466 | zinc finger (C3HC4-type RING finger) family protein                        |
| AT2G27310 | 0.018082608 | 2.4002383 | F-box family protein                                                       |
| AT4G23570 | 0.011878569 | 2.3996806 | phosphatase-like protein                                                   |
| AT5G24230 | 0.002003064 | 2.3994421 | Lipase class 3-related protein                                             |
| AT1G34260 | 0.033651551 | 2.3974743 | FORMS APLOID AND BINUCLEATE CELLS 1A                                       |
| AT1G72070 | 0.006672520 | 2.3974567 | Chaperone DnaJ-domain superfamily protein                                  |
| AT4G18950 | 0.013121787 | 2.3973354 | Integrin-linked protein kinase family                                      |
| AT2G02220 | 0.003014924 | 2.3969767 | phytosulfokin receptor 1                                                   |
| AT1G65500 | 0.001546505 | 2.3956506 | transmembrane protein                                                      |
| AT3G47550 | 0.003208298 | 2.3945728 | RING/FYVE/PHD zinc finger superfamily protein                              |
| AT3G22370 | 0.027408512 | 2.393626  | alternative oxidase 1A                                                     |
| AT4G22305 | 0.003409057 | 2.3892981 | alpha/beta-Hydrolases superfamily protein                                  |
| AT1G53700 | 0.000263447 | 2.3873909 | WAG 1                                                                      |
| AT2G39110 | 0.000890033 | 2.3873637 | Protein kinase superfamily protein                                         |
| AT5G05850 | 0.024802176 | 2.3842539 | plant intracellular ras group-related LRR 1                                |
| AT2G41640 | 0.005368502 | 2.3821092 | Glycosyltransferase family 61 protein                                      |
| AT1G75020 | 0.006013581 | 2.3766674 | lysophosphatidyl acyltransferase 4                                         |
| AT1G77890 | 0.036951057 | 2.3761137 | DNA-directed RNA polymerase II protein                                     |

|           |             |           |                                                                                       |
|-----------|-------------|-----------|---------------------------------------------------------------------------------------|
| AT5G40780 | 0.035821172 | 2.3742803 | lysine histidine transporter 1                                                        |
| AT3G23240 | 0.032767106 | 2.372832  | ethylene response factor 1                                                            |
| AT4G32020 | 0.000137817 | 2.3656568 | serine/arginine repetitive matrix-like protein                                        |
| AT5G56610 | 0.034552998 | 2.3656482 | Phosphotyrosine protein phosphatases superfamily protein                              |
| AT3G21680 | 0.013136281 | 2.3650486 | hypothetical protein                                                                  |
| AT2G30720 | 0.027697914 | 2.3626338 | Thioesterase/thiol ester dehydrase-isomerase superfamily protein                      |
| AT1G76980 | 0.002556929 | 2.3593449 | patatin-like phospholipase domain protein                                             |
| AT3G10640 | 0.036404406 | 2.3587071 | SNF7 family protein                                                                   |
| AT3G45840 | 0.012332181 | 2.3562958 | Cysteine/Histidine-rich C1 domain family protein                                      |
| AT4G09570 | 0.011591713 | 2.3535918 | calcium-dependent protein kinase 4                                                    |
| AT1G17330 | 0.021225939 | 2.3522775 | Metal-dependent phosphohydrolase                                                      |
| AT1G11300 | 0.007723171 | 2.3488054 | G-type lectin S-receptor-like Serine/Threonine-kinase                                 |
| AT1G25400 | 0.017543216 | 2.3468848 | transmembrane protein                                                                 |
| AT3G05200 | 0.000650550 | 2.3467468 | RING/U-box superfamily protein                                                        |
| AT3G19580 | 0.002468884 | 2.3424615 | zinc-finger protein 2                                                                 |
| AT4G36150 | 0.009968760 | 2.3415756 | Disease resistance protein (TIR-NBS-LRR class) family                                 |
| AT5G15730 | 0.040241601 | 2.3383478 | Protein kinase superfamily protein                                                    |
| AT1G78830 | 0.022632317 | 2.3366332 | Curculin-like (mannose-binding) lectin family protein                                 |
| AT5G18490 | 0.010352617 | 2.3351796 | vacuolar sorting-associated protein (DUF946)                                          |
| AT1G61480 | 0.029452526 | 2.3285968 | S-locus lectin protein kinase family protein                                          |
| AT3G23550 | 0.027870934 | 2.3277396 | MATE efflux family protein                                                            |
| AT2G04040 | 0.001355539 | 2.3236913 | MATE efflux family protein                                                            |
| AT4G28400 | 0.001928056 | 2.3225083 | Protein phosphatase 2C family protein                                                 |
| AT2G30870 | 0.027866594 | 2.3205862 | glutathione S-transferase PHI 10                                                      |
| AT3G29400 | 0.014741104 | 2.3199898 | exocyst subunit exo70 family protein E1                                               |
| AT3G44720 | 0.018478926 | 2.3178805 | arogenate dehydratase 4                                                               |
| AT1G63860 | 0.040508788 | 2.3167685 | Disease resistance protein (TIR-NBS-LRR class) family                                 |
| AT1G09970 | 0.010771267 | 2.3165982 | Leucine-rich receptor-like protein kinase family protein                              |
| AT5G20050 | 0.022730581 | 2.3150783 | Protein kinase superfamily protein                                                    |
| AT1G34750 | 0.002205164 | 2.3133843 | Protein phosphatase 2C family protein                                                 |
| AT3G57630 | 0.027059504 | 2.3075465 | exostosin family protein                                                              |
| AT3G48090 | 0.018134295 | 2.3063466 | alpha/beta-Hydrolases superfamily protein                                             |
| AT1G10050 | 0.000811727 | 2.3048691 | glycosyl hydrolase family 10 protein / carbohydrate-binding domain-containing protein |

|           |             |           |                                                                                                 |
|-----------|-------------|-----------|-------------------------------------------------------------------------------------------------|
| AT5G18360 | 0.010929258 | 2.3027198 | Disease resistance protein (TIR-NBS-LRR class) family                                           |
| AT3G51710 | 0.002517639 | 2.3007192 | D-mannose binding lectin protein with Apple-like carbohydrate-binding domain-containing protein |
| AT1G74430 | 0.000555924 | 2.2963206 | myb domain protein 95                                                                           |
| AT3G19020 | 0.002746395 | 2.2934426 | Leucine-rich repeat (LRR) family protein                                                        |
| AT1G03905 | 0.008115813 | 2.2923553 | P-loop containing nucleoside triphosphate hydrolases superfamily protein                        |
| AT4G23240 | 0.021228613 | 2.2784798 | cysteine-rich RLK (RECEPTOR-like protein kinase) 16                                             |
| AT5G26340 | 0.000986803 | 2.2758182 | Major facilitator superfamily protein                                                           |
| AT2G32660 | 0.016542938 | 2.2724367 | receptor like protein 22                                                                        |
| AT4G30530 | 0.017993550 | 2.2717756 | Class I glutamine amidotransferase-like superfamily protein                                     |
| AT3G22930 | 0.014492815 | 2.2714373 | calmodulin-like 11                                                                              |
| AT1G73130 | 0.026126027 | 2.2706343 | mucin                                                                                           |
| AT1G79670 | 0.005291187 | 2.2687447 | Wall-associated kinase family protein                                                           |
| AT5G67350 | 0.017081062 | 2.2639472 | hypothetical protein                                                                            |
| AT3G09910 | 0.013960152 | 2.2632153 | RAB GTPase homolog C2B                                                                          |
| AT5G45280 | 0.017926216 | 2.2621772 | Pectinacetylsterase family protein                                                              |
| AT4G19460 | 0.000615302 | 2.2599767 | UDP-Glycosyltransferase superfamily protein                                                     |
| AT4G05335 | 0.039402764 | 2.2562936 | NA                                                                                              |
| AT2G28570 | 0.007877097 | 2.255681  | hypothetical protein                                                                            |
| AT2G01340 | 0.007284412 | 2.2546327 | plastid movement impaired protein                                                               |
| AT5G02680 | 0.038510889 | 2.2545748 | methionine-tRNA ligase                                                                          |
| AT3G16510 | 0.008391935 | 2.2523568 | Calcium-dependent lipid-binding (CaLB domain) family protein                                    |
| AT3G08170 | 0.041070470 | 2.2494731 | NA                                                                                              |
| AT1G66910 | 0.000766741 | 2.2419455 | Protein kinase superfamily protein                                                              |
| AT5G10380 | 0.033670463 | 2.2362622 | RING/U-box superfamily protein                                                                  |
| AT1G51805 | 0.007233219 | 2.2358396 | Leucine-rich repeat protein kinase family protein                                               |
| AT3G24420 | 0.016189991 | 2.2341056 | alpha/beta-Hydrolases superfamily protein                                                       |
| AT2G44290 | 0.000361855 | 2.2336944 | Bifunctional inhibitor/lipid-transfer protein/seed storage 2S albumin superfamily protein       |
| AT3G07190 | 0.005333864 | 2.2331072 | B-cell receptor-associated protein 31-like protein                                              |
| AT5G60270 | 0.004906686 | 2.2312522 | Concanavalin A-like lectin protein kinase family protein                                        |
| AT3G04110 | 0.007018135 | 2.2236025 | glutamate receptor 1.1                                                                          |
| AT3G06370 | 0.026316078 | 2.2217197 | sodium hydrogen exchanger 4                                                                     |
| AT5G18400 | 0.016983455 | 2.2216626 | Cytokine-induced anti-apoptosis inhibitor 1%2C Fe-S biogenesis                                  |
| AT1G21320 | 0.009987234 | 2.220865  | nucleic acid/nucleotide binding protein                                                         |

|           |             |           |                                                                          |
|-----------|-------------|-----------|--------------------------------------------------------------------------|
| AT3G57330 | 0.013649321 | 2.2207036 | autoinhibited Ca <sup>2+</sup> -ATPase 11                                |
| AT2G43120 | 0.003193240 | 2.2194894 | RmlC-like cupins superfamily protein                                     |
| AT1G25370 | 0.047513580 | 2.2194009 | hypothetical protein (DUF1639)                                           |
| AT5G49300 | 0.009558401 | 2.2160874 | GATA transcription factor 16                                             |
| AT2G39400 | 0.015893768 | 2.2152045 | alpha/beta-Hydrolases superfamily protein                                |
| AT3G15390 | 0.011090159 | 2.2103557 | silencing defective 5                                                    |
| AT1G13590 | 0.037993401 | 2.1966316 | phytosulfokine 1 precursor                                               |
| AT5G45250 | 0.019459044 | 2.1937909 | Disease resistance protein (TIR-NBS-LRR class) family                    |
| AT4G34380 | 0.012722723 | 2.1930985 | Transducin/WD40 repeat-like superfamily protein                          |
| AT4G33300 | 0.001970911 | 2.1929002 | ADR1-like 1                                                              |
| AT3G28450 | 0.000683526 | 2.192705  | Leucine-rich repeat protein kinase family protein                        |
| AT3G15760 | 0.042416321 | 2.1897369 | cytochrome P450 family protein                                           |
| AT5G25050 | 0.024647204 | 2.1886357 | Major facilitator superfamily protein                                    |
| AT1G08940 | 0.001075735 | 2.1884554 | Phosphoglycerate mutase family protein                                   |
| AT5G27760 | 0.001624754 | 2.1883461 | Hypoxia-responsive family protein                                        |
| AT4G01870 | 0.037000945 | 2.1870027 | tolB protein-like protein                                                |
| AT5G35370 | 0.005626811 | 2.1849579 | S-locus lectin protein kinase family protein                             |
| AT2G46530 | 0.005633542 | 2.1843298 | auxin response factor 11                                                 |
| AT5G62020 | 0.039270866 | 2.1834197 | heat shock transcription factor B2A                                      |
| AT1G69520 | 0.016498411 | 2.1817534 | S-adenosyl-L-methionine-dependent methyltransferases superfamily protein |
| AT4G36990 | 0.000553236 | 2.1814535 | heat shock factor 4                                                      |
| AT3G57540 | 0.003169771 | 2.1795282 | Remorin family protein                                                   |
| ATCG01130 | 0.042777036 | 2.1776131 | Ycf1 protein                                                             |
| AT5G38350 | 0.024033583 | 2.1760468 | Disease resistance protein (NBS-LRR class) family                        |
| AT1G61820 | 0.027850756 | 2.1752718 | beta glucosidase 46                                                      |
| AT4G24340 | 0.011366073 | 2.1745061 | Phosphorylase superfamily protein                                        |
| AT3G18830 | 0.001634174 | 2.1680524 | polyol/monosaccharide transporter 5                                      |
| AT3G46690 | 0.000115358 | 2.16437   | UDP-Glycosyltransferase superfamily protein                              |
| AT2G22300 | 0.013778901 | 2.1620459 | signal responsive 1                                                      |
| AT5G56840 | 0.039969581 | 2.1567945 | myb-like transcription factor family protein                             |
| AT5G58690 | 0.011730716 | 2.1541877 | phosphatidylinositol-specific phospholipase C5                           |
| AT1G25277 | 0.025535425 | 2.1533394 | hypothetical protein                                                     |
| AT5G65920 | 0.007497272 | 2.1531237 | ARM repeat superfamily protein                                           |



|           |             |           |                                                                        |
|-----------|-------------|-----------|------------------------------------------------------------------------|
| AT4G15120 | 0.033427601 | 2.1493152 | VQ motif-containing protein                                            |
| AT1G67148 | 0.041839376 | 2.1485327 | hypothetical protein                                                   |
| AT4G05010 | 0.009401617 | 2.1480557 | F-box family protein                                                   |
| AT2G25000 | 0.005573080 | 2.1473211 | WRKY DNA-binding protein 60                                            |
| AT4G04960 | 0.000079435 | 2.1441431 | Concanavalin A-like lectin protein kinase family protein               |
| AT3G58490 | 0.024165212 | 2.1427952 | Phosphatidic acid phosphatase (PAP2) family protein                    |
| AT3G62150 | 0.003791158 | 2.1424858 | P-glycoprotein 21                                                      |
| AT5G44460 | 0.003678644 | 2.139721  | calmodulin like 43                                                     |
| AT5G25440 | 0.034500152 | 2.1382111 | Protein kinase superfamily protein                                     |
| AT5G14930 | 0.030532626 | 2.1376667 | senescence-associated gene 101                                         |
| AT5G11000 | 0.002589846 | 2.1370042 | hypothetical protein (DUF868)                                          |
| AT3G57280 | 0.004303767 | 2.1331644 | Transmembrane proteins 14C                                             |
| AT1G14780 | 0.001797894 | 2.1235773 | MAC/Perforin domain-containing protein                                 |
| AT2G44010 | 0.017857939 | 2.123299  | hypothetical protein                                                   |
| AT1G10480 | 0.016871257 | 2.1230548 | zinc finger protein 5                                                  |
| AT2G40270 | 0.007638551 | 2.1171508 | Protein kinase family protein                                          |
| AT2G32250 | 0.017879247 | 2.1150123 | FAR1-related sequence 2                                                |
| AT5G17680 | 0.026451296 | 2.1122456 | disease resistance protein (TIR-NBS-LRR class)                         |
| AT5G65609 | 0.029349919 | 2.1116047 | hypothetical protein                                                   |
| AT5G66900 | 0.016711921 | 2.1114186 | Disease resistance protein (CC-NBS-LRR class) family                   |
| AT4G24920 | 0.018253907 | 2.1077595 | secE/sec61-gamma protein transport protein                             |
| AT3G01290 | 0.004365965 | 2.1033003 | SPFH/Band 7/PHB domain-containing membrane-associated protein family   |
| AT4G04695 | 0.005128250 | 2.0924423 | calcium-dependent protein kinase 31                                    |
| AT3G46600 | 0.002148873 | 2.089249  | GRAS family transcription factor                                       |
| AT5G54810 | 0.009213692 | 2.0860314 | tryptophan synthase beta-subunit 1                                     |
| AT3G27010 | 0.009279960 | 2.0820877 | TEOSINTE BRANCHED 1%2C cycloidea%2C PCF (TCP)-domain family protein 20 |
| AT2G38250 | 0.019926782 | 2.0818913 | Homeodomain-like superfamily protein                                   |
| AT2G22470 | 0.006377887 | 2.0774796 | arabinogalactan protein 2                                              |
| AT4G13510 | 0.015889371 | 2.0765135 | ammonium transporter 1%3B1                                             |
| AT3G46070 | 0.037934670 | 2.0750113 | C2H2-type zinc finger family protein                                   |
| AT1G18200 | 0.026020581 | 2.0729282 | Rab GTPase-like A1I protein                                            |
| AT3G14870 | 0.022727993 | 2.0701844 | hypothetical protein (DUF641)                                          |
| AT4G11360 | 0.004357556 | 2.0688069 | RING-H2 finger A1B                                                     |

|           |             |           |                                                                                             |
|-----------|-------------|-----------|---------------------------------------------------------------------------------------------|
| AT5G61600 | 0.000518373 | 2.0656226 | ethylene response factor 104                                                                |
| AT5G62770 | 0.000412890 | 2.0655842 | membrane-associated kinase regulator%2C putative (DUF1645)                                  |
| AT3G57730 | 0.011139391 | 2.063892  | Protein kinase superfamily protein                                                          |
| AT5G50570 | 0.004641621 | 2.0610391 | Squamosa promoter-binding protein-like (SBP domain) transcription factor family protein     |
| AT1G62422 | 0.002160339 | 2.0588442 | hypothetical protein                                                                        |
| AT4G21410 | 0.021174546 | 2.0582223 | cysteine-rich RLK (RECEPTOR-like protein kinase) 29                                         |
| AT5G26660 | 0.019122248 | 2.0573354 | myb domain protein 86                                                                       |
| AT5G06860 | 0.035957728 | 2.0557412 | polygalacturonase inhibiting protein 1                                                      |
| AT5G25450 | 0.022429930 | 2.0531781 | Cytochrome bd ubiquinol oxidase%2C 14kDa subunit                                            |
| AT2G11520 | 0.003628606 | 2.0516251 | calmodulin-binding receptor-like cytoplasmic kinase 3                                       |
| AT4G00330 | 0.009335811 | 2.0508157 | calmodulin-binding receptor-like cytoplasmic kinase 2                                       |
| AT2G23200 | 0.001586945 | 2.0507207 | Protein kinase superfamily protein                                                          |
| AT5G39785 | 0.009160483 | 2.0503791 | hypothetical protein (DUF1666)                                                              |
| AT1G08450 | 0.000294606 | 2.049526  | calreticulin 3                                                                              |
| AT3G22800 | 0.010056802 | 2.0487661 | Leucine-rich repeat (LRR) family protein                                                    |
| AT3G50060 | 0.009830723 | 2.042321  | myb domain protein 77                                                                       |
| AT1G13540 | 0.043082588 | 2.041191  | hypothetical protein (DUF1262)                                                              |
| AT2G13650 | 0.033678018 | 2.0380182 | golgi nucleotide sugar transporter 1                                                        |
| AT3G05320 | 0.035260921 | 2.0337861 | O-fucosyltransferase family protein                                                         |
| AT5G63790 | 0.008876233 | 2.0316394 | NAC domain containing protein 102                                                           |
| AT2G32930 | 0.018935933 | 2.0314223 | zinc finger nuclease 2                                                                      |
| AT1G61380 | 0.031197584 | 2.0288327 | S-domain-1 29                                                                               |
| AT4G31500 | 0.008524830 | 2.0280123 | cytochrome P450%2C family 83%2C subfamily B%2C polypeptide 1                                |
| AT1G65490 | 0.034564163 | 2.0276558 | transmembrane protein                                                                       |
| AT2G36780 | 0.013991711 | 2.0256538 | UDP-Glycosyltransferase superfamily protein                                                 |
| AT5G49480 | 0.016120330 | 2.0241891 | Ca2+-binding protein 1                                                                      |
| AT1G14200 | 0.016721236 | 2.0240421 | RING/U-box superfamily protein                                                              |
| AT3G57750 | 0.002764761 | 2.0238519 | Protein kinase superfamily protein                                                          |
| AT5G09980 | 0.049751009 | 2.018833  | elicitor peptide 4 precursor                                                                |
| AT1G35350 | 0.022173519 | 2.0175441 | EXS (ERD1/XPR1/SYG1) family protein                                                         |
| AT4G35600 | 0.011157960 | 2.0171497 | Protein kinase superfamily protein                                                          |
| AT3G50290 | 0.008568812 | 2.0146271 | HXXXD-type acyl-transferase family protein                                                  |
| AT4G30350 | 0.001867589 | 2.0126314 | Double Clp-N motif-containing P-loop nucleoside triphosphate hydrolases superfamily protein |

|           |             |           |                                                                                           |
|-----------|-------------|-----------|-------------------------------------------------------------------------------------------|
| AT1G61430 | 0.033902398 | 2.0119358 | S-locus lectin protein kinase family protein                                              |
| AT4G25810 | 0.017563627 | 2.011009  | xyloglucan endotransglycosylase 6                                                         |
| AT3G20510 | 0.000737756 | 2.0109353 | Transmembrane proteins 14C                                                                |
| AT3G17410 | 0.007742508 | 2.0085988 | Protein kinase superfamily protein                                                        |
| AT1G21520 | 0.032670317 | 2.0074508 | hypothetical protein                                                                      |
| AT3G55470 | 0.039103795 | 2.0057185 | Calcium-dependent lipid-binding (CaLB domain) family protein                              |
| AT3G33103 | 0.007464266 | 2.0056495 | NA                                                                                        |
| AT2G38860 | 0.002787923 | 2.0041833 | Class I glutamine amidotransferase-like superfamily protein                               |
| AT3G14470 | 0.012625887 | 2.0009395 | NB-ARC domain-containing disease resistance protein                                       |
| AT5G07450 | 0.004306774 | 0         | cyclin p4%3B3                                                                             |
| AT4G00416 | 0.047286836 | 0         | methyl-CPG-binding domain 3                                                               |
| AT2G31930 | 0.021543829 | 0         | hypothetical protein                                                                      |
| AT3G03275 | 0.049671771 | 0         | NA                                                                                        |
| ATMG00310 | 0.000034774 | 0         | RNA-directed DNA polymerase (reverse transcriptase)-related family protein                |
| AT5G52290 | 0.014129334 | 0         | shortage in chiasmata 1                                                                   |
| AT3G28360 | 0.019681439 | 0         | P-glycoprotein 16                                                                         |
| AT5G32107 | 0.014117527 | 0         | NA                                                                                        |
| AT1G80340 | 0.036282031 | 0         | gibberellin 3-oxidase 2                                                                   |
| AT2G24710 | 0.043531181 | 0         | glutamate receptor 2.3                                                                    |
| AT1G42924 | 0.042354826 | 0.0526069 | NA                                                                                        |
| AT1G73610 | 0.023062065 | 0.0608119 | GDSL-like Lipase/Acylhydrolase superfamily protein                                        |
| AT1G18320 | 0.040290234 | 0.0620914 | Mitochondrial import inner membrane translocase subunit Tim17/Tim22/Tim23 family protein  |
| AT4G01760 | 0.006138864 | 0.0781001 | Cysteine/Histidine-rich C1 domain family protein                                          |
| AT5G48130 | 0.026801079 | 0.0910041 | Phototropic-responsive NPH3 family protein                                                |
| AT4G04225 | 0.009831069 | 0.0917955 | NA                                                                                        |
| AT2G09510 | 0.003237355 | 0.0919975 | NA                                                                                        |
| AT4G27250 | 0.007912910 | 0.0952763 | NAD(P)-binding Rossmann-fold superfamily protein                                          |
| AT5G37800 | 0.010279044 | 0.0959608 | RHD SIX-LIKE 1                                                                            |
| AT4G22870 | 0.007233437 | 0.1247031 | 2-oxoglutarate (2OG) and Fe(II)-dependent oxygenase superfamily protein                   |
| AT3G52820 | 0.008511570 | 0.1308592 | purple acid phosphatase 22                                                                |
| AT5G01880 | 0.009951476 | 0.1408531 | RING/U-box superfamily protein                                                            |
| AT2G39920 | 0.013449886 | 0.1524846 | HAD superfamily%2C subfamily IIIB acid phosphatase                                        |
| AT1G12100 | 0.020349221 | 0.1678858 | Bifunctional inhibitor/lipid-transfer protein/seed storage 2S albumin superfamily protein |

|           |             |           |                                                                           |
|-----------|-------------|-----------|---------------------------------------------------------------------------|
| AT5G03553 | 0.025472874 | 0.1799511 | hypothetical protein                                                      |
| AT1G04150 | 0.025561140 | 0.1880815 | C2 calcium/lipid-binding plant phosphoribosyltransferase family protein   |
| AT3G63052 | 0.043900432 | 0.1957061 | hypothetical protein                                                      |
| AT4G18980 | 0.026844824 | 0.2060904 | AtS40-3                                                                   |
| AT4G05220 | 0.007344091 | 0.2163193 | Late embryogenesis abundant (LEA) hydroxyproline-rich glycoprotein family |
| AT4G36770 | 0.012231327 | 0.231096  | UDP-Glycosyltransferase superfamily protein                               |
| AT5G39680 | 0.002902120 | 0.236407  | Pentatricopeptide repeat (PPR) superfamily protein                        |
| AT5G61550 | 0.011858961 | 0.2482792 | U-box domain-containing protein kinase family protein                     |
| AT1G25112 | 0.017513988 | 0.2483958 | hypothetical protein                                                      |
| AT4G32535 | 0.014999850 | 0.2537762 | hypothetical protein                                                      |
| AT4G10350 | 0.015641120 | 0.2575658 | NAC domain containing protein 70                                          |
| AT2G35075 | 0.037942912 | 0.2603766 | hypothetical protein                                                      |
| AT3G30846 | 0.016214654 | 0.2623013 | NA                                                                        |
| AT5G18730 | 0.037307932 | 0.2702746 | DNAJ heat shock amino-terminal domain protein                             |
| AT1G29180 | 0.027321523 | 0.2704304 | Cysteine/Histidine-rich C1 domain family protein                          |
| AT1G48500 | 0.010948043 | 0.2741838 | jasmonate-zim-domain protein 4                                            |
| AT1G76230 | 0.016411409 | 0.2761856 | hypothetical protein                                                      |
| AT1G02340 | 0.038270673 | 0.2802465 | basic helix-loop-helix (bHLH) DNA-binding superfamily protein             |
| AT4G38860 | 0.019868999 | 0.2893647 | SAUR-like auxin-responsive protein family                                 |
| AT1G61230 | 0.030957579 | 0.2898155 | Mannose-binding lectin superfamily protein                                |
| AT4G00220 | 0.022433297 | 0.2923091 | Lateral organ boundaries (LOB) domain family protein                      |
| AT4G05690 | 0.032080843 | 0.2923874 | NA                                                                        |
| AT2G47670 | 0.031483265 | 0.2939623 | Plant invertase/pectin methylesterase inhibitor superfamily protein       |
| AT1G35550 | 0.044237601 | 0.2973001 | elongation factor Tu C-terminal domain-containing protein                 |
| AT4G30230 | 0.032754810 | 0.3025346 | hypothetical protein                                                      |
| AT2G05914 | 0.021015140 | 0.3167124 | NA                                                                        |
| AT1G09917 | 0.042425938 | 0.3187427 | NA                                                                        |
| AT3G06360 | 0.021055476 | 0.3271116 | arabinogalactan protein 27                                                |
| AT1G30220 | 0.032433164 | 0.3298402 | inositol transporter 2                                                    |
| AT1G24540 | 0.040455061 | 0.3423926 | cytochrome P450%2C family 86%2C subfamily C%2C polypeptide 1              |
| AT5G20690 | 0.049358905 | 0.3438456 | Leucine-rich repeat protein kinase family protein                         |
| AT4G06536 | 0.031646712 | 0.3450448 | SPLa/Ryanodine receptor (SPRY) domain-containing protein                  |
| AT2G34010 | 0.003942927 | 0.3487813 | verprolin                                                                 |

|           |             |           |                                                                                           |
|-----------|-------------|-----------|-------------------------------------------------------------------------------------------|
| AT5G41460 | 0.014685720 | 0.3602135 | transferring glycosyl group transferase (DUF604)                                          |
| AT4G26288 | 0.010773687 | 0.3608197 | hypothetical protein                                                                      |
| AT2G36270 | 0.027185459 | 0.3687538 | Basic-leucine zipper (bZIP) transcription factor family protein                           |
| AT2G18300 | 0.001127066 | 0.3709464 | basic helix-loop-helix (bHLH) DNA-binding superfamily protein                             |
| AT4G14140 | 0.002635295 | 0.3750427 | DNA methyltransferase 2                                                                   |
| AT1G62350 | 0.031442929 | 0.3949795 | Pentatricopeptide repeat (PPR) superfamily protein                                        |
| AT5G38010 | 0.025960077 | 0.3973418 | UDP-Glycosyltransferase superfamily protein                                               |
| AT1G21220 | 0.013208182 | 0.4069472 | NA                                                                                        |
| AT2G36540 | 0.038804725 | 0.4091226 | Haloacid dehalogenase-like hydrolase (HAD) superfamily protein                            |
| AT3G30180 | 0.030927269 | 0.4121926 | brassinosteroid-6-oxidase 2                                                               |
| AT4G34790 | 0.027985571 | 0.4156761 | SAUR-like auxin-responsive protein family                                                 |
| AT2G30820 | 0.016279484 | 0.4180125 | aspartyl/glutamyl-tRNA(Asn/Gln) amidotransferase subunit                                  |
| AT1G15550 | 0.030908371 | 0.4240502 | gibberellin 3-oxidase 1                                                                   |
| AT5G64190 | 0.000774755 | 0.4264073 | neuronal PAS domain protein                                                               |
| AT5G44680 | 0.008646043 | 0.4298357 | DNA glycosylase superfamily protein                                                       |
| AT4G22495 | 0.025496416 | 0.4301071 | hypothetical protein                                                                      |
| AT1G18280 | 0.020099983 | 0.4331217 | Bifunctional inhibitor/lipid-transfer protein/seed storage 2S albumin superfamily protein |
| AT4G34950 | 0.047051244 | 0.4341208 | Major facilitator superfamily protein                                                     |
| AT4G34770 | 0.000605030 | 0.4357119 | SAUR-like auxin-responsive protein family                                                 |
| AT5G03695 | 0.030650790 | 0.436668  | NA                                                                                        |
| AT5G57180 | 0.000438574 | 0.4406321 | chloroplast import apparatus 2                                                            |
| AT2G34610 | 0.033710584 | 0.4427166 | cotton fiber protein                                                                      |
| AT3G63200 | 0.002595155 | 0.4512905 | PATATIN-like protein 9                                                                    |
| AT4G12910 | 0.022184768 | 0.4547103 | serine carboxypeptidase-like 20                                                           |
| AT4G21215 | 0.003433642 | 0.4559744 | transmembrane protein                                                                     |
| AT5G42370 | 0.030303394 | 0.4581834 | Calcineurin-like metallo-phosphoesterase superfamily protein                              |
| AT4G29905 | 0.000451302 | 0.4606153 | hypothetical protein                                                                      |
| AT2G36050 | 0.001292089 | 0.4622876 | ovate family protein 15                                                                   |
| AT2G46567 | 0.040345896 | 0.4677719 | hypothetical protein                                                                      |
| AT4G19170 | 0.013397323 | 0.4722709 | nine-cis-epoxycarotenoid dioxygenase 4                                                    |
| AT5G23870 | 0.026445309 | 0.4728156 | Pectinacetyltransferase family protein                                                    |
| AT5G11070 | 0.000915724 | 0.4734918 | hypothetical protein                                                                      |
| AT2G35060 | 0.027501266 | 0.4748346 | K <sup>+</sup> uptake permease 11                                                         |

|           |             |           |                                                                          |
|-----------|-------------|-----------|--------------------------------------------------------------------------|
| AT2G02950 | 0.010377280 | 0.4751233 | phytochrome kinase substrate 1                                           |
| AT5G20670 | 0.027254426 | 0.4763989 | DUF1677 family protein (DUF1677)                                         |
| AT2G43445 | 0.009658399 | 0.4782014 | F-box and associated interaction domains-containing protein              |
| AT1G50280 | 0.022070145 | 0.4784756 | Phototropic-responsive NPH3 family protein                               |
| AT4G06534 | 0.027277909 | 0.4827252 | transmembrane protein                                                    |
| AT1G33817 | 0.022061582 | 0.4840162 | NA                                                                       |
| AT2G43200 | 0.019348421 | 0.4867326 | S-adenosyl-L-methionine-dependent methyltransferases superfamily protein |
| AT3G15570 | 0.004373874 | 0.4894502 | Phototropic-responsive NPH3 family protein                               |
| AT1G49660 | 0.028582721 | 0.4896416 | carboxyesterase 5                                                        |
| AT5G59200 | 0.042163810 | 0.4904146 | Tetratricopeptide repeat (TPR)-like superfamily protein                  |
| AT5G62730 | 0.043533110 | 0.491622  | Major facilitator superfamily protein                                    |
| AT1G46480 | 0.030316148 | 0.4940445 | WUSCHEL related homeobox 4                                               |
| AT1G65420 | 0.019058279 | 0.4948314 | antigen receptor-like protein (DUF565)                                   |
| AT5G02760 | 0.002128216 | 0.4950761 | Protein phosphatase 2C family protein                                    |
| AT3G19850 | 0.029420261 | 0.4957246 | Phototropic-responsive NPH3 family protein                               |
| AT5G23280 | 0.030494760 | 0.4977655 | TCP family transcription factor                                          |
| AT3G50310 | 0.024788647 | 0.4995461 | mitogen-activated protein kinase kinase kinase 20                        |
