# Supplementary material for: Cell wall‐derived mixed‐linked β‐1,3/1,4‐glucans trigger immune responses and disease resistance in plants
Source: PubMed Central journal article supplement — Plant J. 2021 Mar 22;106(3):601–15. doi: 10.1111/tpj.15185 (PMC8252745; doi:10.1111/tpj.15185), 2021-03-22
Supplement: TPJ-106-601-s003.pdf [file TPJ-106-601-s003.pdf]

**Table S5:**  $\beta$ -1,3/1,4-glucan oligosaccharides (MLGs) used in this work.

| <b>Acronym</b> | <b>Name</b>                                                                                                                                                                                              | <b>Source</b>                            |
|----------------|----------------------------------------------------------------------------------------------------------------------------------------------------------------------------------------------------------|------------------------------------------|
| MLG43          | $\beta$ -D-Cellobiosyl-(1 $\rightarrow$ 3)- $\beta$ -D-glucose                                                                                                                                           | Megazyme (O-BGTRIB)                      |
| MLG34          | $\beta$ -D-Glucosyl-(1 $\rightarrow$ 3)- $\beta$ -D-cellobiose                                                                                                                                           | Megazyme (O-BGTRIA)                      |
| MLG443         | $\beta$ -D-Cellotriosyl-(1 $\rightarrow$ 3)- $\beta$ -D-glucose                                                                                                                                          | Megazyme (O-BGTETB)                      |
| MLG434+344     | (80%) $\beta$ -D-Cellobiosyl-(1 $\rightarrow$ 3)- $\beta$ -D-cellobiose + (20%) $\beta$ -D-Glucosyl-(1 $\rightarrow$ 3)- $\beta$ -D-cellotriose                                                          | Megazyme (O-BGTETC)                      |
| MLG34'         | $\beta$ -D-Glucosyl-(1 $\rightarrow$ 3)- $\beta$ -D-cellobiose (linker)                                                                                                                                  |                                          |
| MLG434'        | $\beta$ -D-Cellobiosyl-(1 $\rightarrow$ 3)- $\beta$ -D-cellobiose (linker)                                                                                                                               |                                          |
| MLG34443'      | $\beta$ -D-Glucosyl-(1 $\rightarrow$ 3)- $\beta$ -D-cellotetraosyl-(1 $\rightarrow$ 3)- $\beta$ -D-glucose (linker)                                                                                      |                                          |
| MLG43344'      | $\beta$ -D-Cellobiosyl-(1 $\rightarrow$ 3)- $\beta$ -D-glucosyl-(1 $\rightarrow$ 3)- $\beta$ -D-cellotriose (linker)                                                                                     | Synthetic (Dallabernardina et al., 2017) |
| MLG44434'      | $\beta$ -D-Cellotetraosyl-(1 $\rightarrow$ 3)- $\beta$ -D-cellobiose (linker)                                                                                                                            |                                          |
| MLG44343'      | $\beta$ -D-Cellotriosyl-(1 $\rightarrow$ 3)- $\beta$ -D-cellobiosyl-(1 $\rightarrow$ 3)- $\beta$ -D-glucose (linker)                                                                                     |                                          |
| MLG3434443'    | $\beta$ -D-Glucosyl-(1 $\rightarrow$ 3)- $\beta$ -D-cellobiosyl-(1 $\rightarrow$ 3)- $\beta$ -D-glucosyl-(1 $\rightarrow$ 3)- $\beta$ -D-cellotetraosyl-(1 $\rightarrow$ 3)- $\beta$ -D-glucose (linker) |                                          |
