# Supplementary material for: Cell wall‐derived mixed‐linked β‐1,3/1,4‐glucans trigger immune responses and disease resistance in plants
Source: PubMed Central journal article supplement — Plant J. 2021 Mar 22;106(3):601–15. doi: 10.1111/tpj.15185 (PMC8252745; doi:10.1111/tpj.15185), 2021-03-22
Supplement: TPJ-106-601-s005.pdf [file TPJ-106-601-s005.pdf]

**Table S3:** Classification of up-regulated genes into common and specific when comparing chitohexaose and MLG43 treatments in Col-0 plants

|  |                                           |
|--|-------------------------------------------|
|  | MLG43 specific genes vs chitohexaose      |
|  | MLG43 and chitohexaose common genes       |
|  | Chitohexaose specific genes against MLG43 |

| gene ID   | n-fold MLG43 | n-fold Chi6 | p-value MLG43 | p-value Chi6 | Annotation                                                                |
|-----------|--------------|-------------|---------------|--------------|---------------------------------------------------------------------------|
| AT1G04127 | #iDIV/0!     | #iDIV/0!    | 0.041249252   | 0.093851223  | NA                                                                        |
| AT5G44990 | #iDIV/0!     | #iDIV/0!    | 0.016138105   | 0.068699001  | Glutathione S-transferase family protein                                  |
| AT4G31970 | #iDIV/0!     | #iDIV/0!    | 0.025922844   | 0.376289198  | cytochrome P450%2C family 82%2C subfamily C%2C polypeptide 2              |
| AT2G40740 | #iDIV/0!     | #iDIV/0!    | 0.027074013   | 0.08390479   | WRKY DNA-binding protein 55                                               |
| AT1G14550 | #iDIV/0!     | #iDIV/0!    | 0.018360239   | 0.073498151  | Peroxidase superfamily protein                                            |
| AT1G13550 | #iDIV/0!     | #iDIV/0!    | 0.025161714   | 0.100111058  | hypothetical protein (DUF1262)                                            |
| AT5G60260 | #iDIV/0!     | #iDIV/0!    | 0.033734583   | 0.229308054  | hypothetical protein                                                      |
| AT2G47150 | #iDIV/0!     | #iDIV/0!    | 0.043560178   | 0.183592789  | NAD(P)-binding Rossmann-fold superfamily protein                          |
| AT1G16140 | #iDIV/0!     | #iDIV/0!    | 6.25109E-05   | 0.058874359  | NA                                                                        |
| AT4G05940 | #iDIV/0!     | #iDIV/0!    | 0.000239534   | NA           | NA                                                                        |
| AT4G32510 | #iDIV/0!     | #iDIV/0!    | 0.029095872   | 0.183541826  | HCO3- transporter family                                                  |
| AT5G06820 | #iDIV/0!     | #iDIV/0!    | 0.012169166   | 0.120565455  | STRUBBELIG-receptor family 2                                              |
| AT5G53135 | #iDIV/0!     | #iDIV/0!    | 0.040295136   | 0.234905521  | NA                                                                        |
| AT1G18382 | #iDIV/0!     | #iDIV/0!    | 0.024897725   | 0.305650867  | NA                                                                        |
| AT3G13433 | #iDIV/0!     | #iDIV/0!    | 0.023867154   | 0.05050201   | transmembrane protein                                                     |
| AT5G44565 | #iDIV/0!     | #iDIV/0!    | 0.04223909    | 0.422649731  | transmembrane protein                                                     |
| AT1G49030 | #iDIV/0!     | #iDIV/0!    | 0.046336217   | 0.422649731  | PLAC8 family protein                                                      |
| AT3G51560 | #iDIV/0!     | #iDIV/0!    | 0.006252216   | 0.051963884  | Disease resistance protein (TIR-NBS-LRR class) family                     |
| AT5G48890 | #iDIV/0!     | #iDIV/0!    | 0.001208848   | NA           | C2H2-like zinc finger protein                                             |
| AT4G01735 | #iDIV/0!     | #iDIV/0!    | 0.025445603   | 0.186224496  | polyhomeotic-like protein                                                 |
| AT3G02705 | #iDIV/0!     | #iDIV/0!    | 0.0142037     | 0.147044333  | NA                                                                        |
| AT3G09922 | #iDIV/0!     | #iDIV/0!    | 0.019880144   | NA           | induced by phosphate starvation1                                          |
| AT1G27820 | #iDIV/0!     | #iDIV/0!    | 0.036077363   | 0.258952837  | Polynucleotidyl transferase%2C ribonuclease H-like superfamily protein    |
| AT5G52710 | #iDIV/0!     | #iDIV/0!    | 0.010610321   | 0.10071378   | Copper transport protein family                                           |
| AT3G50160 | #iDIV/0!     | #iDIV/0!    | 0.037550743   | 0.056239266  | transmembrane protein%2C putative (DUF247)                                |
| AT1G79680 | 187.6428268  | 221.1592933 | 0.012214081   | 0.062268664  | WALL ASSOCIATED KINASE (WAK)-LIKE 10                                      |
| AT1G15625 | 86.96991711  | 118.1293087 | 0.0071304     | 0.054246239  | E3 ubiquitin-protein ligase                                               |
| AT4G23610 | 71.62725965  | 137.0471512 | 0.025545673   | 0.066857476  | Late embryogenesis abundant (LEA) hydroxyproline-rich glycoprotein family |
| AT5G52670 | 50.57316497  | 34.55531347 | 0.016160714   | 0.127001999  | Copper transport protein family                                           |
| AT1G67980 | 47.50103497  | 28.27107019 | 0.000513025   | 0.072275402  | caffeoyl-CoA 3-O-methyltransferase                                        |
| AT3G53600 | 39.84075308  | 37.61279714 | 0.017071632   | 0.142021399  | C2H2-type zinc finger family protein                                      |
| AT5G01540 | 33.15669334  | 57.6305006  | 0.020414687   | 0.093928603  | lectin receptor kinase a4.1                                               |
| AT5G40000 | 29.59181191  | 49.50485482 | 0.005787712   | 0.083531996  | P-loop containing nucleoside triphosphate hydrolases superfamily protein  |

|           |             |             |             |             |                                                                     |
|-----------|-------------|-------------|-------------|-------------|---------------------------------------------------------------------|
| AT1G21230 | 26.4856577  | 41.724022   | 0.009646583 | 0.078522749 | wall associated kinase 5                                            |
| AT4G15236 | 26.02566456 | 23.08736741 | 0.020951325 | 0.063142559 | ABC-2 and Plant PDR ABC-type transporter family protein             |
| AT1G67000 | 24.66101761 | 22.41763561 | 0.039130398 | 0.103143403 | Protein kinase superfamily protein                                  |
| AT1G68450 | 23.57636396 | 21.45525537 | 0.027597603 | 0.065797473 | VQ motif-containing protein                                         |
| AT2G18210 | 20.80085425 | 20.3306822  | 0.020954066 | 0.081800723 | hypothetical protein                                                |
| AT2G43000 | 20.01749812 | 24.15155492 | 0.024344827 | 0.10305589  | NAC domain containing protein 42                                    |
| AT1G69150 | 18.98994864 | 5.633530044 | 0.040867406 | 0.107323839 | Cysteine/Histidine-rich C1 domain family protein                    |
| AT1G13480 | 18.98506662 | 23.33778013 | 0.003915681 | 0.058609487 | hypothetical protein (DUF1262)                                      |
| AT5G45070 | 17.43435133 | 15.66620213 | 0.038821126 | 0.063105236 | phloem protein 2-A8                                                 |
| AT3G49580 | 16.16942145 | 7.775401488 | 0.006268262 | 0.163341252 | response to low sulfur 1                                            |
| AT5G12340 | 14.59793147 | 8.228360908 | 0.01155328  | 0.12724125  | DUF4228 domain protein                                              |
| AT5G02895 | 14.04095383 | 11.81890477 | 0.010550204 | 0.199675415 | NA                                                                  |
| AT2G07305 | 13.18817699 | 4.907254299 | 0.042090948 | 0.446708014 | NA                                                                  |
| AT5G51190 | 11.79181791 | 19.42215773 | 0.004194448 | 0.204829919 | Integrase-type DNA-binding superfamily protein                      |
| AT3G04135 | 11.73562385 | 9.042343428 | 0.047736153 | 0.144311953 | NA                                                                  |
| AT5G40590 | 11.60998601 | 6.935781049 | 0.003613718 | 0.101456288 | Cysteine/Histidine-rich C1 domain family protein                    |
| AT4G21903 | 11.39296583 | 9.334750547 | 0.001579847 | 0.095181151 | MATE efflux family protein                                          |
| AT2G01360 | 11.24100403 | 3.842756237 | 0.042818736 | 0.540529384 | pentatricopeptide (PPR) repeat protein                              |
| AT2G28210 | 10.76410484 | 16.66657667 | 0.017128698 | 0.1364163   | alpha carbonic anhydrase 2                                          |
| AT1G28480 | 10.62553932 | 10.41554184 | 0.011616656 | 0.170450984 | Thioredoxin superfamily protein                                     |
| AT3G18250 | 9.965187336 | 5.54964476  | 0.012355378 | 0.061229567 | Putative membrane lipoprotein                                       |
| AT2G04510 | 9.80986832  | 13.4807074  | 0.027486567 | 0.119701259 | NA                                                                  |
| AT4G03480 | 9.66571917  | 5.277242188 | 0.00970062  | 0.071286793 | Ankyrin repeat family protein                                       |
| AT2G07769 | 9.524659626 | 5.360147885 | 0.008359846 | 0.308698979 | NA                                                                  |
| AT4G28085 | 9.485539002 | 9.259522326 | 0.023851284 | 0.178715006 | transmembrane protein                                               |
| AT5G42930 | 9.133694652 | 2.427943342 | 0.030230439 | 0.530011758 | alpha/beta-Hydrolases superfamily protein                           |
| AT4G36052 | 9.099738746 | 3.723336947 | 0.003710085 | 0.45331988  | NA                                                                  |
| AT3G12880 | 9.077483621 | 9.151802826 | 0.021341173 | 0.118060205 | Plant invertase/pectin methylesterase inhibitor superfamily protein |
| AT4G29340 | 8.768443603 | 2.353264092 | 0.011038525 | 0.484418012 | profilin 4                                                          |
| AT1G19250 | 8.658415423 | 13.03083118 | 0.039368978 | 0.172968244 | flavin-dependent monooxygenase 1                                    |
| AT1G06073 | 7.923717845 | 3.216247371 | 0.020575347 | 0.568438941 | NA                                                                  |
| AT1G32960 | 7.815174234 | 10.3262422  | 0.047081776 | 0.061759964 | Subtilase family protein                                            |
| AT1G76430 | 7.758637544 | 6.977310495 | 0.020443603 | 0.109607318 | phosphate transporter 1%3B9                                         |
| AT2G18690 | 7.520278554 | 11.50748924 | 0.002009085 | 0.206975122 | transmembrane protein                                               |
| AT1G17990 | 7.494186292 | 2.932138536 | 0.002053398 | 0.580041514 | FMN-linked oxidoreductases superfamily protein                      |
| AT1G28370 | 7.461955224 | 11.34315289 | 0.033307839 | 0.167814442 | ERF domain protein 11                                               |
| AT4G10510 | 7.274475877 | 7.176110402 | 0.033459284 | 0.057091008 | Subtilase family protein                                            |
| AT5G05215 | 7.152476916 | 1.514884922 | 0.001710238 | 0.650398188 | NA                                                                  |
| AT1G18020 | 7.147077933 | 9.68447357  | 0.022237887 | 0.129465968 | FMN-linked oxidoreductases superfamily protein                      |
| AT5G06740 | 7.096870273 | 7.736579114 | 0.000259753 | 0.075842495 | Concanavalin A-like lectin protein kinase family protein            |

|           |             |             |             |             |                                                              |
|-----------|-------------|-------------|-------------|-------------|--------------------------------------------------------------|
| AT5G49780 | 6.692178528 | 3.993297638 | 0.003368321 | 0.138271262 | Leucine-rich repeat protein kinase family protein            |
| AT2G01180 | 6.339850814 | 5.82407964  | 0.014532669 | 0.446672848 | phosphatidic acid phosphatase 1                              |
| AT2G17060 | 6.277028379 | 9.984419238 | 0.038166406 | 0.06452161  | Disease resistance protein (TIR-NBS-LRR class) family        |
| AT3G09020 | 6.192471154 | 8.925389851 | 0.007294852 | 0.237174701 | alpha 1%2C4-glycosyltransferase family protein               |
| AT1G74590 | 5.95480715  | 3.554170517 | 0.020130169 | 0.076776036 | glutathione S-transferase TAU 10                             |
| AT1G30190 | 5.93685199  | 11.53350678 | 0.045382373 | 0.078650574 | cotton fiber protein                                         |
| AT3G49570 | 5.859760085 | 2.402688783 | 0.00407074  | 0.412611545 | response to low sulfur 3                                     |
| AT5G64900 | 5.839845489 | 3.484205599 | 0.031038274 | 0.132730434 | precursor of peptide 1                                       |
| AT3G43840 | 5.602787537 | 3.266811577 | 0.024072757 | 0.140054729 | 3-oxo-5-alpha-steroid 4-dehydrogenase family protein         |
| AT5G67310 | 5.52407475  | 8.049153277 | 0.002392899 | 0.103181553 | cytochrome P450%2C family 81%2C subfamily G%2C polypeptide 1 |
| AT4G08860 | 5.404823279 | 0           | 0.033743541 | 0.422649731 | NA                                                           |
| AT3G09345 | 5.363738829 | 6.94564984  | 0.029919771 | 0.208353302 | NA                                                           |
| AT2G09994 | 5.183870369 | 4.223514132 | 0.047582533 | 0.265886099 | NA                                                           |
| ATMG00540 | 5.080468514 | 3.08738825  | 0.044710754 | 0.34312536  | hypothetical protein                                         |
| AT2G07713 | 5.080468514 | 3.08738825  | 0.044710754 | 0.34312536  | hypothetical protein                                         |
| AT3G22125 | 5.053567827 | 3.723888072 | 0.015861184 | 0.167585405 | transmembrane protein                                        |
| AT3G04640 | 4.996775399 | 6.168675646 | 0.025056022 | 0.188985456 | glycine-rich protein                                         |
| AT3G09940 | 4.951116041 | 2.933401105 | 0.005499153 | 0.159209745 | monodehydroascorbate reductase                               |
| AT1G06867 | 4.775110512 | 2.852895517 | 0.018126507 | 0.151373099 | NA                                                           |
| AT5G01881 | 4.735574528 | 2.509143101 | 0.009382212 | 0.246097211 | transmembrane protein                                        |
| AT1G14480 | 4.704749571 | 10.31102358 | 0.030661792 | 0.050511733 | Ankyrin repeat family protein                                |
| AT1G53980 | 4.622444364 | 1.864745485 | 0.002792426 | 0.459765237 | Ubiquitin-like superfamily protein                           |
| AT3G61280 | 4.601027185 | 3.447850366 | 0.014759537 | 0.271189172 | O-glucosyltransferase rumi-like protein (DUF821)             |
| AT5G66670 | 4.488935369 | 4.74644112  | 0.000170558 | 0.141396466 | pectinesterase%2C putative (DUF677)                          |
| AT3G42883 | 4.359732521 | 4.396988582 | 0.034700278 | 0.080520329 | NA                                                           |
| AT4G10990 | 4.215886962 | 7.801141253 | 0.021435991 | 0.058915034 | NA                                                           |
| AT3G12720 | 4.190543124 | 2.06827027  | 0.049321557 | 0.336586762 | myb domain protein 67                                        |
| AT4G21840 | 4.177381396 | 1.864580697 | 0.029479205 | 0.409929102 | methionine sulfoxide reductase B8                            |
| AT4G04505 | 4.084536456 | 0           | 0.015297171 | 0.18352636  | NA                                                           |
| AT1G50310 | 4.056672935 | 5.028821146 | 0.012118201 | 0.140990381 | sugar transporter 9                                          |
| AT5G67080 | 4.031074221 | 2.976672122 | 0.036717172 | 0.084899304 | mitogen-activated protein kinase kinase kinase 19            |
| AT1G21100 | 3.951743665 | 3.963707478 | 0.008222066 | 0.05044672  | O-methyltransferase family protein                           |
| AT4G39030 | 3.942559159 | 4.46275632  | 0.004328571 | 0.059688248 | MATE efflux family protein                                   |
| AT5G44063 | 3.901428287 | 2.552891617 | 0.027362963 | 0.42518261  | hypothetical protein                                         |
| AT1G07620 | 3.876399393 | 3.319846519 | 0.004891887 | 0.068598186 | GTP-binding protein Obg/CgtA                                 |
| AT2G07661 | 3.865310327 | 2.072589922 | 0.015341249 | 0.237839342 | hypothetical protein                                         |
| AT1G73010 | 3.86279628  | 6.168647007 | 0.012961546 | 0.090531059 | inorganic pyrophosphatase 1                                  |
| AT3G01140 | 3.856187663 | 2.150495222 | 0.046841181 | 0.566415578 | myb domain protein 106                                       |
| AT1G53633 | 3.843977169 | 2.805512321 | 0.018914852 | 0.327149686 | hypothetical protein                                         |
| AT1G19180 | 3.826343862 | 4.685004382 | 0.027110234 | 0.071637384 | jasmonate-zim-domain protein 1                               |

|           |             |             |             |             |                                                                                           |
|-----------|-------------|-------------|-------------|-------------|-------------------------------------------------------------------------------------------|
| AT4G07165 | 3.788301086 | 5.789442631 | 0.043236779 | 0.294394168 | NA                                                                                        |
| AT2G07825 | 3.576037583 | 2.557571245 | 0.03700466  | 0.27092926  | hypothetical protein                                                                      |
| AT1G53990 | 3.543574817 | 1.166745328 | 0.000525252 | 0.495180062 | GDSL-motif lipase 3                                                                       |
| AT4G18430 | 3.532415995 | 4.596829398 | 0.020818221 | 0.056162705 | RAB GTPase homolog A1E                                                                    |
| AT5G52320 | 3.516601582 | 2.032110055 | 0.046790464 | 0.125876664 | cytochrome P450%2C family 96%2C subfamily A%2C polypeptide 4                              |
| AT5G23000 | 3.506226475 | 2.973245222 | 0.000655099 | 0.082559642 | myb domain protein 37                                                                     |
| AT2G44340 | 3.450125777 | 0.88607778  | 0.023841058 | 0.877850059 | VQ motif-containing protein                                                               |
| AT5G52200 | 3.449516998 | 2.90092066  | 0.003913226 | 0.286894113 | phosphoprotein phosphatase inhibitor                                                      |
| AT2G02310 | 3.448730031 | 1.999499692 | 0.04839015  | 0.48107028  | phloem protein 2-B6                                                                       |
| AT1G03920 | 3.443830251 | 2.342403048 | 0.033384077 | 0.188922924 | Protein kinase family protein                                                             |
| AT2G30750 | 3.438450922 | 3.313308568 | 0.028785483 | 0.208695123 | cytochrome P450 family 71 polypeptide                                                     |
| AT5G44900 | 3.337334646 | 2.474953785 | 0.043832546 | 0.106027821 | Toll-Interleukin-Resistance (TIR) domain family protein                                   |
| AT3G13020 | 3.326330757 | 4.101732138 | 0.013556182 | 0.055346953 | hAT transposon superfamily protein                                                        |
| AT5G53990 | 3.321118466 | 2.041552102 | 0.03188971  | 0.066300715 | UDP-Glycosyltransferase superfamily protein                                               |
| AT5G44582 | 3.297862655 | 2.882163255 | 0.019240182 | 0.055716049 | hypothetical protein                                                                      |
| AT5G46350 | 3.254166857 | 1.849330423 | 0.009589942 | 0.068225747 | WRKY DNA-binding protein 8                                                                |
| AT1G17750 | 3.213007867 | 5.453001191 | 0.02713926  | 0.075663041 | PEP1 receptor 2                                                                           |
| AT2G07644 | 3.211306344 | 1.477128937 | 0.048682973 | 0.715437596 | hypothetical protein                                                                      |
| AT5G24240 | 3.180558481 | 4.163756588 | 0.000478313 | 0.110682078 | phosphatidylinositol 4-kinase gamma-like protein                                          |
| AT2G02380 | 3.15230142  | 0.376036107 | 0.035116416 | 0.364626763 | glutathione S-transferase (class zeta) 2                                                  |
| AT5G38212 | 3.136001954 | 4.037357776 | 0.005542884 | 0.104710606 | NA                                                                                        |
| AT1G51670 | 3.101620557 | 6.108607785 | 0.031674077 | 0.062564542 | hypothetical protein                                                                      |
| AT4G29770 | 3.093099082 | 2.926236792 | 0.035848175 | 0.073218913 | target of trans acting-siR480/255 protein                                                 |
| AT3G57210 | 3.08761698  | 3.247090991 | 0.048910096 | 0.116066838 | hypothetical protein                                                                      |
| AT5G59550 | 3.051897533 | 4.764775336 | 0.024638313 | 0.203440292 | zinc finger (C3HC4-type RING finger) family protein                                       |
| AT3G06490 | 3.046789549 | 2.349366592 | 0.024210645 | 0.169388268 | myb domain protein 108                                                                    |
| AT1G74080 | 2.974857292 | 2.68211122  | 0.013475329 | 0.122237937 | myb domain protein 122                                                                    |
| AT1G72930 | 2.954979454 | 2.595674701 | 0.001928502 | 0.109981799 | toll/interleukin-1 receptor-like protein                                                  |
| AT1G18860 | 2.920387154 | 2.057032096 | 0.019352284 | 0.213840877 | WRKY DNA-binding protein 61                                                               |
| AT2G18150 | 2.907733959 | 2.025355096 | 0.009669967 | 0.066346013 | Peroxidase superfamily protein                                                            |
| AT3G01513 | 2.882071981 | 1.465014653 | 0.013376274 | 0.305635913 | hypothetical protein                                                                      |
| AT5G60320 | 2.86075397  | 0           | 0.002723868 | 0.03752019  | Concanavalin A-like lectin protein kinase family protein                                  |
| AT3G45080 | 2.854364307 | 1.479801058 | 0.042106573 | 0.357643764 | P-loop containing nucleoside triphosphate hydrolases superfamily protein                  |
| AT5G03210 | 2.842913551 | 6.62003168  | 0.024682048 | 0.114512242 | E3 ubiquitin-protein ligase                                                               |
| AT3G45330 | 2.814236376 | 1.594921694 | 0.03525271  | 0.227093285 | Concanavalin A-like lectin protein kinase family protein                                  |
| AT1G72540 | 2.803474456 | 1.669882685 | 0.010584987 | 0.167413275 | Protein kinase superfamily protein                                                        |
| AT2G15760 | 2.803410177 | 1.660475578 | 0.014667428 | 0.213938197 | calmodulin-binding protein (DUF1645)                                                      |
| AT1G23560 | 2.803192484 | 1.996352854 | 0.008871865 | 0.020528257 | OBP32pep%2C putative (DUF220)                                                             |
| AT4G22610 | 2.790535055 | 1.116658513 | 0.045841458 | 0.855926916 | Bifunctional inhibitor/lipid-transfer protein/seed storage 2S albumin superfamily protein |
| AT3G12040 | 2.689333254 | 2.279683477 | 0.01163638  | 0.103440091 | DNA-3-methyladenine glycosylase (MAG)                                                     |

|           |             |             |             |             |                                                                                                 |
|-----------|-------------|-------------|-------------|-------------|-------------------------------------------------------------------------------------------------|
| AT4G29570 | 2.671303592 | 0.891276716 | 0.045438382 | 0.82993936  | Cytidine/deoxycytidylate deaminase family protein                                               |
| AT5G44480 | 2.643047961 | 2.197910933 | 0.024804205 | 0.094422415 | NAD(P)-binding Rossmann-fold superfamily protein                                                |
| AT3G03020 | 2.627436394 | 3.93759934  | 0.046148517 | 0.068310775 | hypothetical protein                                                                            |
| AT3G52800 | 2.627128184 | 1.271242547 | 0.001670032 | 0.850822326 | A20/AN1-like zinc finger family protein                                                         |
| AT3G55090 | 2.61308869  | 1.704227998 | 0.009068709 | 0.148911637 | ABC-2 type transporter family protein                                                           |
| AT5G59270 | 2.597225118 | 1.489250433 | 0.005689885 | 0.603936004 | Concanavalin A-like lectin protein kinase family protein                                        |
| AT5G41835 | 2.582151556 | 1.196694817 | 0.032890364 | 0.482114383 | NA                                                                                              |
| AT5G64530 | 2.569613239 | 2.38053927  | 0.010416937 | 0.128823352 | xylem NAC domain 1                                                                              |
| AT5G44575 | 2.539779966 | 1.451884687 | 0.001918224 | 0.183245964 | hypothetical protein                                                                            |
| AT2G46750 | 2.507356234 | 1.539814016 | 0.007136448 | 0.262252619 | D-arabinono-1%2C4-lactone oxidase family protein                                                |
| AT2G41082 | 2.502292869 | 1.705750739 | 0.011131976 | 0.052580009 | hypothetical protein                                                                            |
| AT5G46330 | 2.498669989 | 2.250855658 | 0.003476942 | 0.207258039 | Leucine-rich receptor-like protein kinase family protein                                        |
| AT2G13900 | 2.480479049 | 1.472956668 | 0.009142728 | 0.351524938 | Cysteine/Histidine-rich C1 domain family protein                                                |
| AT1G35710 | 2.468127768 | 2.772236133 | 0.042810072 | 0.097444029 | kinase family with leucine-rich repeat domain-containing protein                                |
| AT2G39420 | 2.416074738 | 1.67140116  | 0.004670622 | 0.112685388 | alpha/beta-Hydrolases superfamily protein                                                       |
| AT1G13510 | 2.413674378 | 1.30976652  | 0.015000998 | 0.719881381 | hypothetical protein (DUF1262)                                                                  |
| AT1G72070 | 2.397456652 | 1.883137782 | 0.00667252  | 0.022950441 | Chaperone DnaJ-domain superfamily protein                                                       |
| AT3G47550 | 2.394572789 | 2.812949769 | 0.003208298 | 0.109750735 | RING/FYVE/PHD zinc finger superfamily protein                                                   |
| AT1G53700 | 2.387390862 | 1.720944876 | 0.000263447 | 0.000760463 | WAG 1                                                                                           |
| AT3G21680 | 2.365048575 | 1.042692047 | 0.013136281 | 0.890790764 | hypothetical protein                                                                            |
| AT3G23550 | 2.327739559 | 1.582219719 | 0.027870934 | 0.095778164 | MATE efflux family protein                                                                      |
| AT3G51710 | 2.300719233 | 1.933519166 | 0.002517639 | 0.016720865 | D-mannose binding lectin protein with Apple-like carbohydrate-binding domain-containing protein |
| AT2G32660 | 2.27243675  | 1.969228767 | 0.016542938 | 0.175586423 | receptor like protein 22                                                                        |
| AT3G09910 | 2.263215337 | 1.737029856 | 0.013960152 | 0.179963023 | RAB GTPase homolog C2B                                                                          |
| AT4G19460 | 2.259976669 | 3.610771083 | 0.000615302 | 0.063103586 | UDP-Glycosyltransferase superfamily protein                                                     |
| AT4G05335 | 2.256293631 | 0.877244192 | 0.039402764 | 0.827692546 | NA                                                                                              |
| AT5G02680 | 2.254574785 | 2.080814985 | 0.038510889 | 0.103313823 | methionine-tRNA ligase                                                                          |
| AT3G08170 | 2.249473073 | 1.837817737 | 0.04107047  | 0.087008044 | NA                                                                                              |
| AT1G51805 | 2.235839566 | 1.972604443 | 0.007233219 | 0.00778962  | Leucine-rich repeat protein kinase family protein                                               |
| AT3G24420 | 2.234105599 | 1.490959812 | 0.016189991 | 0.065199632 | alpha/beta-Hydrolases superfamily protein                                                       |
| AT5G49300 | 2.216087388 | 1.28778966  | 0.009558401 | 0.328958693 | GATA transcription factor 16                                                                    |
| AT3G15390 | 2.210355691 | 1.851533469 | 0.011090159 | 0.018636298 | silencing defective 5                                                                           |
| AT2G46530 | 2.184329835 | 1.557106899 | 0.005633542 | 0.151491025 | auxin response factor 11                                                                        |
| ATCG01130 | 2.177613052 | 1.417667825 | 0.042777036 | 0.27604181  | Ycf1 protein                                                                                    |
| AT4G24340 | 2.174506064 | 1.948506482 | 0.011366073 | 0.370753188 | Phosphorylase superfamily protein                                                               |
| AT3G18830 | 2.168052387 | 1.763746851 | 0.001634174 | 0.04285939  | polyol/monosaccharide transporter 5                                                             |
| AT5G56840 | 2.15679452  | 1.261418572 | 0.039969581 | 0.734604721 | myb-like transcription factor family protein                                                    |
| AT5G58690 | 2.154187748 | 1.804056722 | 0.011730716 | 0.034372723 | phosphatidylinositol-speciwc phospholipase C5                                                   |
| AT1G25277 | 2.153339433 | 1.314830693 | 0.025535425 | 0.28174217  | hypothetical protein                                                                            |
| AT1G67148 | 2.148532742 | 1.606109377 | 0.041839376 | 0.047074661 | hypothetical protein                                                                            |

|           |             |             |             |             |                                                                                           |
|-----------|-------------|-------------|-------------|-------------|-------------------------------------------------------------------------------------------|
| AT2G25000 | 2.147321149 | 1.046701506 | 0.00557308  | 0.789809365 | WRKY DNA-binding protein 60                                                               |
| AT5G44460 | 2.139721036 | 1.605224347 | 0.003678644 | 0.061979471 | calmodulin like 43                                                                        |
| AT1G10480 | 2.123054758 | 1.469064296 | 0.016871257 | 0.186370955 | zinc finger protein 5                                                                     |
| AT5G65609 | 2.111604681 | 1.566545138 | 0.029349919 | 0.181361297 | hypothetical protein                                                                      |
| AT3G46070 | 2.075011281 | 1.299199782 | 0.03793467  | 0.608986123 | C2H2-type zinc finger family protein                                                      |
| AT3G57730 | 2.063892024 | 3.208311342 | 0.011139391 | 0.309423711 | Protein kinase superfamily protein                                                        |
| AT5G26660 | 2.057335419 | 1.313611794 | 0.019122248 | 0.066385733 | myb domain protein 86                                                                     |
| AT5G25450 | 2.053178111 | 1.711974588 | 0.02242993  | 0.008155726 | Cytochrome bd ubiquinol oxidase%2C 14kDa subunit                                          |
| AT3G22800 | 2.048766098 | 2.135595254 | 0.010056802 | 0.08250972  | Leucine-rich repeat (LRR) family protein                                                  |
| AT1G13540 | 2.041190958 | 2.211756767 | 0.043082588 | 0.180622968 | hypothetical protein (DUF1262)                                                            |
| AT5G63790 | 2.031639377 | 1.99656962  | 0.008876233 | 0.011011659 | NAC domain containing protein 102                                                         |
| AT4G31500 | 2.028012346 | 1.819448774 | 0.00852483  | 0.072448292 | cytochrome P450%2C family 83%2C subfamily B%2C polypeptide 1                              |
| AT5G49480 | 2.024189108 | 1.876821425 | 0.01612033  | 0.001996504 | Ca2+-binding protein 1                                                                    |
| AT1G14200 | 2.024042052 | 2.395284715 | 0.016721236 | 0.229656035 | RING/U-box superfamily protein                                                            |
| AT5G09980 | 2.018833002 | 1.643828596 | 0.049751009 | 0.221523544 | elicitor peptide 4 precursor                                                              |
| AT3G50290 | 2.01462714  | 1.029087993 | 0.008568812 | 0.875323731 | HXXXD-type acyl-transferase family protein                                                |
| AT1G21520 | 2.007450781 | 0.931845273 | 0.032670317 | 0.78495371  | hypothetical protein                                                                      |
| AT3G33103 | 2.005649543 | 1.799030426 | 0.007464266 | 0.098920852 | NA                                                                                        |
| AT2G38860 | 2.004183311 | 1.660647717 | 0.002787923 | 0.039166093 | Class I glutamine amidotransferase-like superfamily protein                               |
| AT3G14470 | 2.000939495 | 1.973426073 | 0.012625887 | 0.047162515 | NB-ARC domain-containing disease resistance protein                                       |
| AT2G43120 | 2.21948937  | 2.919376118 | 0.00319324  | 0.0322263   | RmlC-like cupins superfamily protein                                                      |
| AT4G19520 | 4.634693253 | 11.04462976 | 0.01704877  | 0.038804768 | disease resistance protein (TIR-NBS-LRR class) family                                     |
| AT1G51660 | 2.726338651 | 7.822221974 | 0.029521757 | 0.001144629 | mitogen-activated protein kinase kinase 4                                                 |
| AT1G65486 | 3.00270798  | 6.563311085 | 0.022366432 | 0.004391635 | transmembrane protein                                                                     |
| AT3G18710 | 8.693845009 | 14.23063558 | 1.89386E-05 | 0.019928049 | plant U-box 29                                                                            |
| AT1G51890 | 15.80088775 | 34.67010924 | 0.006257557 | 0.023313416 | Leucine-rich repeat protein kinase family protein                                         |
| AT5G35370 | 2.184957898 | 2.174494985 | 0.005626811 | 0.003127673 | S-locus lectin protein kinase family protein                                              |
| AT1G19770 | 3.237056938 | 7.809012469 | 0.019260148 | 0.015278187 | purine permease 14                                                                        |
| AT5G41680 | 8.012077943 | 12.05564076 | 0.02661408  | 0.018509774 | Protein kinase superfamily protein                                                        |
| AT2G40095 | 8.535647385 | 14.46877643 | 0.014217762 | 0.001387208 | Alpha/beta hydrolase related protein                                                      |
| AT4G12720 | 4.752876097 | 9.961513948 | 0.032592216 | 0.001238849 | MutT/nudix family protein                                                                 |
| AT2G44290 | 2.233694381 | 3.867867647 | 0.000361855 | 0.003649859 | Bifunctional inhibitor/lipid-transfer protein/seed storage 2S albumin superfamily protein |
| AT1G65510 | 3.894730239 | 5.030065274 | 0.018742198 | 0.00516009  | transmembrane protein                                                                     |
| AT1G31540 | 2.598684638 | 3.9250847   | 0.00469686  | 0.007828346 | Disease resistance protein (TIR-NBS-LRR class) family                                     |
| AT5G64890 | 70.40759385 | 42.33127029 | 0.001533279 | 1.085E-05   | elicitor peptide 2 precursor                                                              |
| AT5G20050 | 2.315078288 | 2.829203545 | 0.022730581 | 0.007016317 | Protein kinase superfamily protein                                                        |
| AT3G52400 | 9.342446706 | 23.67014318 | 0.011688237 | 0.008163096 | syntaxin of plants 122                                                                    |
| AT1G72920 | 5.84842012  | 11.56687929 | 0.012727062 | 0.029708718 | Toll-Interleukin-Resistance (TIR) domain family protein                                   |
| AT3G45440 | 6.262639778 | 4.510305302 | 0.004026072 | 0.033321613 | Concanavalin A-like lectin protein kinase family protein                                  |
| AT1G61340 | 5.687150036 | 14.86840215 | 0.031257011 | 0.001288782 | F-box family protein                                                                      |

|           |             |             |             |             |                                                                          |
|-----------|-------------|-------------|-------------|-------------|--------------------------------------------------------------------------|
| AT5G45280 | 2.262177195 | 3.361527384 | 0.017926216 | 0.00886594  | Pectinacylesterase family protein                                        |
| AT1G27770 | 3.866396567 | 8.525198248 | 0.014947229 | 0.015085642 | autoinhibited Ca2+-ATPase 1                                              |
| AT3G51920 | 3.213447069 | 4.356749942 | 0.002696275 | 0.012515764 | calmodulin 9                                                             |
| AT2G17705 | 2.617553195 | 4.231544381 | 0.012004644 | 0.003964955 | methionine-S-oxide reductase                                             |
| AT1G11050 | 4.535411743 | 6.484400982 | 0.002889989 | 0.005137452 | Protein kinase superfamily protein                                       |
| AT1G69810 | 2.605967011 | 2.401801992 | 0.002338456 | 0.03770864  | WRKY DNA-binding protein 36                                              |
| AT3G22060 | 3.129962291 | 4.6387627   | 0.021316759 | 0.000183083 | Receptor-like protein kinase-related family protein                      |
| AT3G50060 | 2.042321043 | 2.521836578 | 0.009830723 | 0.000953427 | myb domain protein 77                                                    |
| AT5G38350 | 2.176046758 | 2.565557787 | 0.024033583 | 7.43878E-05 | Disease resistance protein (NBS-LRR class) family                        |
| AT2G38870 | 3.923298941 | 4.943053294 | 0.020495345 | 0.009289108 | Serine protease inhibitor%2C potato inhibitor I-type family protein      |
| AT1G65484 | 43.05844715 | 58.99765462 | 0.009544266 | 0.019018011 | transmembrane protein                                                    |
| AT3G25510 | 2.727711292 | 3.128937748 | 0.002308289 | 0.001103134 | disease resistance protein (TIR-NBS-LRR class) family protein            |
| AT2G40180 | 5.842704146 | 16.41654732 | 0.03198219  | 5.56105E-06 | phosphatase 2C5                                                          |
| AT4G37370 | 23.2202821  | 23.55749714 | 0.012351809 | 0.003486883 | cytochrome P450%2C family 81%2C subfamily D%2C polypeptide 8             |
| AT4G04960 | 2.144143114 | 2.807478918 | 7.94347E-05 | 0.024986381 | Concanavalin A-like lectin protein kinase family protein                 |
| AT3G13100 | 4.396056093 | 6.276946882 | 0.020057103 | 0.007595491 | multidrug resistance-associated protein 7                                |
| AT5G11210 | 79.3873993  | 116.3907831 | 0.007703675 | 0.019777052 | glutamate receptor 2.5                                                   |
| AT1G27730 | 11.04102148 | 28.46609577 | 0.012180599 | 0.002016975 | salt tolerance zinc finger                                               |
| AT2G46620 | 3.70494556  | 7.817262794 | 0.01294083  | 0.003080793 | P-loop containing nucleoside triphosphate hydrolases superfamily protein |
| AT4G17615 | 3.335664937 | 4.494167802 | 0.01691867  | 0.004345752 | calcineurin B-like protein 1                                             |
| AT3G55470 | 2.005718464 | 2.758123303 | 0.039103795 | 0.000582361 | Calcium-dependent lipid-binding (CaLB domain) family protein             |
| AT2G39380 | 27.35040694 | 20.52537317 | 0.006910413 | 0.03545239  | exocyst subunit exo70 family protein H2                                  |
| AT4G24110 | 2.916464094 | 4.271615261 | 0.015662625 | 0.007409099 | NADP-specific glutamate dehydrogenase                                    |
| AT1G19415 | 3.388945211 | 3.549136069 | 0.020868003 | 0.025762596 | NA                                                                       |
| AT3G44400 | 2.556114525 | 5.101622668 | 0.008190057 | 0.006826026 | Disease resistance protein (TIR-NBS-LRR class) family                    |
| AT2G40000 | 2.425088496 | 4.863451014 | 0.010460035 | 0.006790765 | ortholog of sugar beet HS1 PRO-1 2                                       |
| AT3G13437 | 4.326501912 | 5.626758189 | 0.005985071 | 0.00567033  | transmembrane protein                                                    |
| AT2G44840 | 8.897003751 | 19.94647277 | 0.031817932 | 0.013518592 | ethylene-responsive element binding factor 13                            |
| AT1G56240 | 33.07116587 | 73.55136045 | 0.030793302 | 0.00048686  | phloem protein 2-B13                                                     |
| AT1G23840 | 3.749108002 | 5.570188975 | 0.001995977 | 0.009528391 | transmembrane protein                                                    |
| AT3G05370 | 9.114945278 | 11.35686269 | 0.000870075 | 9.72409E-06 | receptor like protein 31                                                 |
| AT2G26560 | 38.84607256 | 117.2490775 | 0.023193994 | 0.030002798 | phospholipase A 2A                                                       |
| AT2G46430 | 16.38367043 | 24.42875793 | 0.002378405 | 0.005087355 | cyclic nucleotide gated channel 3                                        |
| AT1G52200 | 5.520156285 | 5.85838705  | 0.002327256 | 0.001611863 | PLAC8 family protein                                                     |
| AT3G05200 | 2.346746849 | 3.284354134 | 0.00065055  | 0.000350735 | RING/U-box superfamily protein                                           |
| AT4G23200 | 2.594048911 | 8.714929838 | 0.015556749 | 0.012170045 | cysteine-rich RLK (RECEPTOR-like protein kinase) 12                      |
| AT1G26380 | 161.7438889 | 226.6050642 | 0.018412427 | 0.000156871 | FAD-binding Berberine family protein                                     |
| AT5G12930 | 4.024369654 | 5.452906932 | 0.014104046 | 0.001218702 | inactive rhomboid protein                                                |
| AT1G13590 | 2.196631622 | 2.94751916  | 0.037993401 | 0.008249444 | phytosulfokine 1 precursor                                               |
| AT2G01040 | #iDIV/0!    | #iDIV/0!    | 0.001229953 | 0.035698518 | NA                                                                       |

|           |             |             |             |             |                                                                          |
|-----------|-------------|-------------|-------------|-------------|--------------------------------------------------------------------------|
| AT3G13650 | 5.019441665 | 3.311904239 | 0.00011842  | 0.043730731 | Disease resistance-responsive (dirigent-like protein) family protein     |
| AT1G59870 | 7.71154593  | 13.19382568 | 0.015278353 | 0.017608561 | ABC-2 and Plant PDR ABC-type transporter family protein                  |
| AT1G59620 | 2.778104083 | 3.594538041 | 0.005869392 | 0.007888818 | Disease resistance protein (CC-NBS-LRR class) family                     |
| AT5G54710 | 9.086970841 | 19.11131502 | 0.024005381 | 9.0442E-05  | Ankyrin repeat family protein                                            |
| AT1G51820 | 10.45392738 | 14.6897732  | 0.022453045 | 0.00079019  | Leucine-rich repeat protein kinase family protein                        |
| AT2G42060 | 10.03654077 | 12.77730852 | 0.002422124 | 0.024557639 | Cysteine/Histidine-rich C1 domain family protein                         |
| AT3G46690 | 2.164369974 | 2.372451644 | 0.000115358 | 0.022236449 | UDP-Glycosyltransferase superfamily protein                              |
| AT4G09570 | 2.353591821 | 4.194187351 | 0.011591713 | 0.000381936 | calcium-dependent protein kinase 4                                       |
| AT3G08710 | 3.593507819 | 5.552351943 | 0.00998993  | 0.001582933 | thioredoxin H-type 9                                                     |
| AT3G06890 | 4.163324736 | 5.464667578 | 0.008988873 | 0.003518192 | transmembrane protein                                                    |
| AT5G25250 | 14.28737229 | 47.38115418 | 0.03558997  | 0.000508491 | SPFH/Band 7/PHB domain-containing membrane-associated protein family     |
| AT2G32240 | 3.32551212  | 4.041599401 | 0.037413986 | 0.000113462 | early endosome antigen                                                   |
| AT2G41380 | 3.225544077 | 2.568586362 | 0.000638293 | 0.002266348 | S-adenosyl-L-methionine-dependent methyltransferases superfamily protein |
| AT3G50470 | 3.163556041 | 4.998267069 | 0.022229695 | 0.005938881 | homolog of RPW8 3                                                        |
| AT5G22690 | 4.736664734 | 9.081962656 | 0.048318933 | 0.006257059 | Disease resistance protein (TIR-NBS-LRR class) family                    |
| AT2G20960 | 6.425950945 | 14.42080039 | 0.005019869 | 0.005695281 | phospholipase-like protein (PEARLI 4) family protein                     |
| AT3G44630 | 2.617359752 | 4.177812659 | 0.006609318 | 0.008002107 | Disease resistance protein (TIR-NBS-LRR class) family                    |
| AT3G11080 | 5.146779714 | 9.859669255 | 0.006077188 | 0.011751186 | receptor like protein 35                                                 |
| AT2G30720 | 2.36263378  | 2.661482427 | 0.027697914 | 0.009489459 | Thioesterase/thiol ester dehydrase-isomerase superfamily protein         |
| AT5G48410 | 5.161621955 | 6.675915419 | 0.001909403 | 0.04505235  | glutamate receptor 1.3                                                   |
| AT5G44910 | 9.731976967 | 16.39334483 | 0.005535864 | 5.16446E-06 | Toll-Interleukin-Resistance (TIR) domain family protein                  |
| AT3G10815 | 3.782446423 | 5.546820514 | 0.007476954 | 0.013422555 | RING/U-box superfamily protein                                           |
| AT3G21630 | 3.873979588 | 5.83411741  | 0.00251328  | 0.001116299 | chitin elicitor receptor kinase 1                                        |
| AT4G39230 | 2.702084989 | 3.76184918  | 0.026022157 | 3.48827E-06 | NmrA-like negative transcriptional regulator family protein              |
| AT5G44585 | 15.61392695 | 17.30095365 | 0.01396668  | 0.022044417 | hypothetical protein                                                     |
| AT2G17040 | 13.59681058 | 71.34431779 | 0.027711169 | 0.002570683 | NAC domain containing protein 36                                         |
| AT4G18197 | 12.38274855 | 18.23000851 | 0.015411145 | 0.036615108 | purine permease 7                                                        |
| AT4G36550 | 3.021784046 | 5.436389568 | 0.001380143 | 0.003787486 | ARM repeat superfamily protein                                           |
| AT1G03220 | 3.657474881 | 4.764413033 | 0.013638877 | 8.35781E-05 | Eukaryotic aspartyl protease family protein                              |
| AT1G56540 | 3.970344649 | 7.785263583 | 0.023813574 | 0.00634664  | Disease resistance protein (TIR-NBS-LRR class) family                    |
| AT1G61460 | 7.318104378 | 11.27240397 | 0.026004524 | 0.00195327  | G-type lectin S-receptor-like Serine/Threonine-kinase                    |
| AT5G54720 | 5.293985637 | 16.58967172 | 0.026954202 | 0.037257503 | Ankyrin repeat family protein                                            |
| AT3G59700 | 4.654638991 | 8.373869133 | 5.83983E-05 | 0.017580755 | lectin-receptor kinase                                                   |
| AT3G19615 | 19.74760458 | 17.55470285 | 0.000115343 | 0.018759437 | beta-1%2C4-xylosidase                                                    |
| AT2G39660 | 2.498165175 | 3.204494365 | 0.006709539 | 0.00286619  | botrytis-induced kinase1                                                 |
| AT5G15730 | 2.338347845 | 3.433420221 | 0.040241601 | 0.002522139 | Protein kinase superfamily protein                                       |
| AT3G21080 | 2.919745358 | 3.951089451 | 0.003750506 | 0.009736793 | ABC transporter-like protein                                             |
| AT3G45650 | 4.362627637 | 5.17351206  | 0.014807105 | 8.80934E-05 | nitrate excretion transporter1                                           |
| AT2G31945 | 3.526318315 | 5.421270246 | 0.025288177 | 0.008511188 | transmembrane protein                                                    |
| AT1G75860 | 2.514128132 | 3.207789543 | 0.048811509 | 0.017708091 | DNA ligase                                                               |



|           |             |             |             |             |                                                                                                 |
|-----------|-------------|-------------|-------------|-------------|-------------------------------------------------------------------------------------------------|
| AT3G50480 | 2.700932499 | 4.182830962 | 0.007081537 | 0.001762313 | homolog of RPW8 4                                                                               |
| AT5G11670 | 2.748509076 | 5.366484145 | 0.006993786 | 0.005443069 | NADP-malic enzyme 2                                                                             |
| AT5G10380 | 2.2362622   | 2.62578041  | 0.033670463 | 0.000420031 | RING/U-box superfamily protein                                                                  |
| AT5G45080 | 5.213176361 | 3.357866515 | 0.002418965 | 0.003803893 | phloem protein 2-A6                                                                             |
| AT3G52748 | 6.054512358 | 5.481600244 | 0.020435293 | 0.041462615 | NA                                                                                              |
| AT4G22690 | 6.078384323 | 9.513387908 | 0.015299772 | 0.003957962 | cytochrome P450%2C family 706%2C subfamily A%2C polypeptide 1                                   |
| AT2G19710 | 2.472697355 | 4.419875313 | 0.018358407 | 0.007103343 | Regulator of Vps4 activity in the MVB pathway protein                                           |
| AT4G34180 | 3.12587502  | 3.700492387 | 0.009383088 | 0.000286771 | Cyclase family protein                                                                          |
| AT1G78850 | 3.130243724 | 4.685169609 | 0.014312114 | 0.018214411 | D-mannose binding lectin protein with Apple-like carbohydrate-binding domain-containing protein |
| AT1G53625 | 69.19007965 | 137.6615727 | 0.027201988 | 0.001812148 | hypothetical protein                                                                            |
| AT2G31230 | 3.544482255 | 4.358395876 | 0.00839854  | 0.001022972 | ethylene-responsive element binding factor 15                                                   |
| AT5G08790 | 3.450786126 | 3.655119605 | 0.006032413 | 0.000150892 | NAC (No Apical Meristem) domain transcriptional regulator superfamily protein                   |
| AT2G22300 | 2.162045854 | 3.44765227  | 0.013778901 | 0.005224642 | signal responsive 1                                                                             |
| AT4G02200 | 3.037804118 | 5.974608152 | 0.018423402 | 0.002154253 | Drought-responsive family protein                                                               |
| AT5G03700 | 2.548488424 | 3.009445458 | 0.005549342 | 0.000216828 | D-mannose binding lectin protein with Apple-like carbohydrate-binding domain-containing protein |
| AT1G71697 | 2.997371446 | 6.036485501 | 0.019350709 | 0.005216372 | choline kinase 1                                                                                |
| AT2G03530 | 3.842155319 | 4.231082101 | 0.004928458 | 0.000534411 | ureide permease 2                                                                               |
| AT4G13395 | 2.965344609 | 2.726581404 | 0.046721421 | 0.007492714 | ROTUNDIFOLIA like 12                                                                            |
| AT5G26340 | 2.275818245 | 2.470350734 | 0.000986803 | 0.047216617 | Major facilitator superfamily protein                                                           |
| AT4G14220 | 3.246198128 | 3.662553184 | 0.000301073 | 0.003248122 | RING-H2 group F1A                                                                               |
| AT4G23220 | 19.78197931 | 60.48443181 | 0.015262617 | 0.001421654 | cysteine-rich RECEPTOR-like kinase                                                              |
| AT3G57550 | 2.540240984 | 3.638212552 | 0.005726381 | 0.002306012 | guanylate kinase                                                                                |
| AT1G19380 | 3.191984532 | 4.983319275 | 0.010184461 | 0.004879264 | sugar%2C putative (DUF1195)                                                                     |
| AT5G44070 | 12.12482699 | 24.12205398 | 0.008575798 | 0.006201499 | phytochelatin synthase 1 (PCS1)                                                                 |
| AT2G22470 | 2.077479628 | 3.954396936 | 0.006377887 | 0.004377205 | arabinogalactan protein 2                                                                       |
| AT5G14930 | 2.137666689 | 4.799010856 | 0.030532626 | 0.00940282  | senescence-associated gene 101                                                                  |
| AT5G59820 | 2.952309262 | 12.37688352 | 0.02171359  | 5.09485E-06 | C2H2-type zinc finger family protein                                                            |
| AT1G56510 | 3.269335682 | 5.831347659 | 0.01865226  | 0.00728034  | Disease resistance protein (TIR-NBS-LRR class)                                                  |
| AT5G47230 | 9.508744893 | 27.11711711 | 0.002549238 | 0.001625934 | ethylene responsive element binding factor 5                                                    |
| AT3G28340 | 3.005016896 | 9.306674406 | 0.011809205 | 0.007045106 | galacturonosyltransferase-like 10                                                               |
| AT4G33060 | 2.483558288 | 2.691609758 | 0.022249828 | 0.028963387 | Cyclophilin-like peptidyl-prolyl cis-trans isomerase family protein                             |
| AT4G35600 | 2.017149692 | 4.093629013 | 0.01115796  | 0.000149362 | Protein kinase superfamily protein                                                              |
| AT3G54420 | 4.498204721 | 12.18530071 | 0.000195973 | 0.018298965 | homolog of carrot EP3-3 chitinase                                                               |
| AT3G57740 | 5.217259501 | 7.245869737 | 0.032073761 | 0.01224669  | Protein kinase superfamily protein                                                              |
| AT4G23570 | 2.399680596 | 3.253521515 | 0.011878569 | 0.002583825 | phosphatase-like protein                                                                        |
| AT1G76600 | 2.914933676 | 6.60319276  | 0.02601721  | 1.43566E-06 | poly polymerase                                                                                 |
| AT4G37290 | 39.76748384 | 77.09343811 | 0.043696751 | 0.023373704 | transmembrane protein                                                                           |
| AT1G80840 | 9.034208847 | 16.43170068 | 0.025001605 | 0.002964154 | WRKY DNA-binding protein 40                                                                     |
| AT4G25390 | 2.755689744 | 4.243481523 | 0.017860801 | 0.000364091 | Protein kinase superfamily protein                                                              |
| AT5G15130 | 8.803233295 | 5.580079689 | 0.000132699 | 0.048808795 | WRKY DNA-binding protein 72                                                                     |

|           |             |             |             |             |                                                                                             |
|-----------|-------------|-------------|-------------|-------------|---------------------------------------------------------------------------------------------|
| AT2G46440 | 5.086598377 | 4.855018424 | 0.024475519 | 0.003106621 | cyclic nucleotide-gated channels                                                            |
| AT1G70140 | 3.988586965 | 7.470852506 | 0.02326571  | 0.002360089 | formin 8                                                                                    |
| AT4G20000 | 34.57369768 | 52.96109305 | 0.003288737 | 0.003672569 | VQ motif-containing protein                                                                 |
| AT5G01640 | 2.587918548 | 4.10383525  | 0.004397273 | 0.010699966 | prenylated RAB acceptor 1.B5                                                                |
| AT2G32210 | 3.916462879 | 14.07265831 | 0.034109126 | 0.006043021 | cysteine-rich/transmembrane domain A-like protein                                           |
| AT2G44380 | 2.988964877 | 3.147972234 | 0.000654123 | 0.000186551 | Cysteine/Histidine-rich C1 domain family protein                                            |
| AT1G10050 | 2.3048691   | 3.049822329 | 0.000811727 | 0.000217468 | glycosyl hydrolase family 10 protein / carbohydrate-binding domain-containing protein       |
| AT2G19190 | 36.22604962 | 24.72377056 | 0.005751695 | 0.010826615 | FLG22-induced receptor-like kinase 1                                                        |
| AT1G30755 | 10.67472436 | 14.76293622 | 0.011749347 | 0.001216088 | elongation factor G%2C putative (DUF668)                                                    |
| AT2G41835 | 2.709978179 | 4.57132892  | 0.008883363 | 0.00088371  | zinc finger (C2H2 type%2C AN1-like) family protein                                          |
| AT4G34390 | 4.270525971 | 9.930715798 | 0.023213554 | 0.003040187 | extra-large GTP-binding protein 2                                                           |
| AT3G52430 | 4.824105383 | 6.865761103 | 2.73556E-05 | 0.0180995   | alpha/beta-Hydrolases superfamily protein                                                   |
| AT1G30420 | 3.496656451 | 3.904963169 | 0.012943222 | 0.010069607 | multidrug resistance-associated protein 12                                                  |
| AT4G15417 | 26.13380964 | 72.439391   | 0.006505891 | 0.005111312 | RNAse II-like 1                                                                             |
| AT1G63830 | 2.64149083  | 4.833035221 | 0.002970194 | 0.002373766 | PLAC8 family protein                                                                        |
| AT2G31880 | 8.680807785 | 16.80831118 | 0.016145794 | 0.005021072 | Leucine-rich repeat protein kinase family protein                                           |
| AT2G25460 | 7.080615139 | 13.38474044 | 0.009755254 | 0.009814825 | EEG1/EHBP1 protein amino-terminal domain protein                                            |
| AT2G39110 | 2.387363713 | 2.264380414 | 0.000890033 | 0.001547795 | Protein kinase superfamily protein                                                          |
| AT1G80820 | 14.75297311 | 19.15600753 | 0.017401755 | 0.03809917  | cinnamoyl coa reductase                                                                     |
| AT3G57330 | 2.220703608 | 3.301147193 | 0.013649321 | 0.008397549 | autoinhibited Ca2+-ATPase 11                                                                |
| AT3G09830 | 8.194549692 | 18.94622764 | 0.00857391  | 7.24543E-05 | Protein kinase superfamily protein                                                          |
| AT1G33600 | 5.183164759 | 8.089177394 | 0.012020732 | 6.07075E-05 | Leucine-rich repeat (LRR) family protein                                                    |
| AT5G52750 | 14.66030161 | 39.41583057 | 0.013117609 | 0.003676689 | Heavy metal transport/detoxification superfamily protein                                    |
| AT5G60270 | 2.231252205 | 2.999150739 | 0.004906686 | 0.000366033 | Concanavalin A-like lectin protein kinase family protein                                    |
| AT5G65920 | 2.15312372  | 2.657557159 | 0.007497272 | 0.001160035 | ARM repeat superfamily protein                                                              |
| AT1G63750 | 3.631478846 | 5.447134025 | 0.002031567 | 0.005331147 | Disease resistance protein (TIR-NBS-LRR class) family                                       |
| AT3G62780 | 2.980006254 | 3.889106463 | 0.049217713 | 0.021236292 | Calcium-dependent lipid-binding (CaLB domain) family protein                                |
| AT3G28210 | 3.104213562 | 6.429302755 | 0.002504269 | 0.005112127 | zinc finger (AN1-like) family protein                                                       |
| AT5G01005 | 7.056250117 | 6.728468904 | 0.003092393 | 7.88035E-05 | NA                                                                                          |
| AT1G14370 | 3.494642007 | 6.591414063 | 0.008242494 | 0.005545595 | protein kinase 2A                                                                           |
| AT5G28630 | 15.44775039 | 18.73676331 | 0.022170965 | 0.007969956 | glycine-rich protein                                                                        |
| AT5G10695 | 2.812357184 | 5.682974287 | 0.010684804 | 0.004454535 | methionyl-tRNA synthetase                                                                   |
| AT2G47190 | 3.086551363 | 2.744555923 | 0.016801171 | 0.0191647   | myb domain protein 2                                                                        |
| AT5G66630 | 2.584957571 | 4.519168867 | 0.030214264 | 1.0143E-05  | DA1-related protein 5                                                                       |
| AT4G17490 | 11.05232993 | 19.56239212 | 0.001459416 | 0.0038847   | ethylene responsive element binding factor 6                                                |
| AT4G35590 | 9.372269108 | 22.12937226 | 0.043927968 | 0.011777643 | RWP-RK domain-containing protein                                                            |
| AT5G46910 | 4.239027553 | 7.758416305 | 0.028641606 | 0.001711838 | Transcription factor jumonji (jmj) family protein / zinc finger (C5HC2 type) family protein |
| AT5G62150 | 16.54267534 | 34.08103141 | 0.017302911 | 0.01423738  | peptidoglycan-binding LysM domain-containing protein                                        |
| AT1G49000 | 12.2971534  | 23.76458379 | 0.010829524 | 0.00265141  | transmembrane protein                                                                       |
| AT2G44370 | 19.79832463 | 41.2049376  | 0.002600024 | 0.010117196 | Cysteine/Histidine-rich C1 domain family protein                                            |

|           |             |             |             |             |                                                                          |
|-----------|-------------|-------------|-------------|-------------|--------------------------------------------------------------------------|
| AT1G03905 | 2.29235534  | 2.757364657 | 0.008115813 | 0.016033057 | P-loop containing nucleoside triphosphate hydrolases superfamily protein |
| AT3G13435 | 4.790351027 | 4.328140558 | 0.005765897 | 0.018002811 | transmembrane protein                                                    |
| AT3G11820 | 4.906541611 | 8.392478686 | 0.014611864 | 0.033555528 | syntaxin of plants 121                                                   |
| AT5G64870 | 5.57862712  | 16.23981735 | 0.015613772 | 0.041948572 | SPFH/Band 7/PHB domain-containing membrane-associated protein family     |
| AT4G14630 | 29.55838194 | 72.28631713 | 0.00963169  | 0.043610872 | germin-like protein 9                                                    |
| AT3G02585 | 12.77084976 | 25.77754056 | 0.03525558  | 0.0401852   | NA                                                                       |
| AT1G63860 | 2.316768481 | 3.330898355 | 0.040508788 | 0.004126746 | Disease resistance protein (TIR-NBS-LRR class) family                    |
| AT5G05850 | 2.384253933 | 3.662518471 | 0.024802176 | 0.002901044 | plant intracellular ras group-related LRR 1                              |
| AT5G41740 | 8.871017468 | 20.87254681 | 0.008629786 | 0.000778802 | Disease resistance protein (TIR-NBS-LRR class) family                    |
| AT1G51850 | 5.516613498 | 5.966269094 | 0.002060857 | 0.006678945 | Leucine-rich repeat protein kinase family protein                        |
| AT4G36990 | 2.181453519 | 2.378056674 | 0.000553236 | 0.0147746   | heat shock factor 4                                                      |
| AT5G15870 | 5.058586397 | 13.56087496 | 0.009953043 | 0.016496737 | glycosyl hydrolase family 81 protein                                     |
| AT5G49520 | 4.455193211 | 8.417321856 | 3.50108E-05 | 0.000917022 | WRKY DNA-binding protein 48                                              |
| AT3G12740 | 2.558035209 | 3.337360102 | 0.008630707 | 0.003545438 | ALA-interacting subunit 1                                                |
| AT3G03030 | 5.752531124 | 13.4460275  | 0.019612814 | 0.010265107 | F-box/RNI-like superfamily protein                                       |
| AT2G20142 | 8.966825314 | 16.46491181 | 0.003136161 | 3.11074E-07 | Toll-Interleukin-Resistance (TIR) domain family protein                  |
| AT2G32020 | 9.58112577  | 11.87180803 | 0.011828259 | 0.01073437  | Acyl-CoA N-acyltransferases (NAT) superfamily protein                    |
| AT1G09930 | #jDIV/0!    | #jDIV/0!    | 0.020284579 | 0.004015611 | oligopeptide transporter 2                                               |
| AT2G28570 | 2.255681    | 3.152065021 | 0.007877097 | 0.009646608 | hypothetical protein                                                     |
| AT3G50460 | 2.603460885 | 3.187122094 | 0.019619153 | 0.018355936 | homolog of RPW8 2                                                        |
| AT3G58490 | 2.142795161 | 2.795236946 | 0.024165212 | 0.00226706  | Phosphatidic acid phosphatase (PAP2) family protein                      |
| AT5G45240 | 35.25008199 | 108.3454673 | 0.026815718 | 0.027888036 | Disease resistance protein (TIR-NBS-LRR class)                           |
| AT3G48090 | 2.306346595 | 6.007891337 | 0.018134295 | 1.29446E-05 | alpha/beta-Hydrolases superfamily protein                                |
| AT1G16110 | 4.113053201 | 6.390098457 | 0.008825303 | 0.002871462 | wall associated kinase-like 6                                            |
| AT5G41100 | 6.144523732 | 9.47691262  | 0.008297699 | 0.002819959 | hydroxyproline-rich glycoprotein family protein                          |
| AT1G09950 | 2.796009552 | 6.335434765 | 0.044256965 | 0.016460705 | RESPONSE TO ABA AND SALT 1                                               |
| AT2G36780 | 2.0256538   | 2.634182727 | 0.013991711 | 0.02095847  | UDP-Glycosyltransferase superfamily protein                              |
| AT1G61480 | 2.328596754 | 2.444191268 | 0.029452526 | 0.024374364 | S-locus lectin protein kinase family protein                             |
| AT3G04210 | 5.390940514 | 4.524553608 | 0.02458988  | 0.003108386 | Disease resistance protein (TIR-NBS class)                               |
| AT4G11330 | 2.981055248 | 6.466088027 | 0.003200783 | 0.021250597 | MAP kinase 5                                                             |
| AT4G36150 | 2.341575566 | 2.763063254 | 0.00996876  | 0.001920354 | Disease resistance protein (TIR-NBS-LRR class) family                    |
| AT1G47890 | 24.86814244 | 23.97463118 | 0.038239549 | 0.022041989 | receptor like protein 7                                                  |
| AT3G49530 | 3.045482072 | 5.855706196 | 0.001850885 | 0.006911939 | NAC domain containing protein 62                                         |
| AT5G60350 | #jDIV/0!    | #jDIV/0!    | 0.011266216 | 0.045291547 | hypothetical protein                                                     |
| AT1G58561 | 3.280928735 | 2.219154128 | 6.88417E-05 | 0.003917452 | NA                                                                       |
| AT4G33040 | 2.832486181 | 3.683810268 | 0.047327963 | 0.004559147 | Thioredoxin superfamily protein                                          |
| AT1G66880 | 3.748346465 | 7.732569086 | 0.00057247  | 0.008653544 | Protein kinase superfamily protein                                       |
| AT1G51790 | 3.430162475 | 7.139127105 | 0.000247747 | 0.001104074 | Leucine-rich repeat protein kinase family protein                        |
| AT1G74330 | 3.32079484  | 3.911379038 | 0.016001526 | 0.00442262  | Protein kinase superfamily protein                                       |
| AT3G57750 | 2.023851857 | 2.169353285 | 0.002764761 | 0.001487507 | Protein kinase superfamily protein                                       |

|           |             |             |             |             |                                                                                        |
|-----------|-------------|-------------|-------------|-------------|----------------------------------------------------------------------------------------|
| AT2G31865 | 8.737050806 | 19.0958345  | 0.013305648 | 0.002921772 | poly(ADP-ribose) glycohydrolase 2                                                      |
| AT4G32300 | 2.417604428 | 2.759450834 | 0.005554152 | 0.00270865  | S-domain-2 5                                                                           |
| AT1G26420 | 30.15916525 | 38.17541414 | 0.006669607 | 0.001621877 | FAD-binding Berberine family protein                                                   |
| AT1G07000 | 6.615203165 | 18.53726585 | 0.031371605 | 0.002346079 | exocyst subunit exo70 family protein B2                                                |
| AT1G18390 | 8.277779758 | 10.12504967 | 0.001700117 | 0.003778437 | Serine/Threonine kinase family catalytic domain protein                                |
| AT2G39518 | 6.321736391 | 13.28262164 | 0.000450986 | 0.017553369 | Uncharacterized protein family (UPF0497)                                               |
| AT1G28190 | 5.745219784 | 4.766890544 | 0.00970287  | 0.012062323 | hypothetical protein                                                                   |
| AT4G01750 | 8.305577662 | 10.40864282 | 0.007339383 | 1.44957E-05 | rhamnogalacturonan xylosyltransferase 2                                                |
| AT4G11000 | 18.80064387 | 21.75561173 | 0.002483657 | 0.002336773 | Ankyrin repeat family protein                                                          |
| AT4G11170 | 220.6977207 | 403.9129243 | 0.01319754  | 0.009446723 | Disease resistance protein (TIR-NBS-LRR class) family                                  |
| AT1G51700 | 5.239531838 | 10.48371345 | 0.012666918 | 0.004455448 | DOF zinc finger protein 1                                                              |
| AT5G13210 | 3.288607104 | 2.567317447 | 0.033258129 | 0.000177393 | Uncharacterized conserved protein UCP015417%2C vWA                                     |
| AT5G59680 | 11.11620669 | 15.13887426 | 0.006500426 | 0.000126736 | Leucine-rich repeat protein kinase family protein                                      |
| AT3G48450 | 21.21639447 | 14.87822433 | 0.036383644 | 0.026876677 | RPM1-interacting protein 4 (RIN4) family protein                                       |
| AT5G05300 | 79.7792643  | 295.2957382 | 0.023953909 | 0.001257866 | hypothetical protein                                                                   |
| AT3G50140 | 2.612979226 | 3.631487557 | 0.000357899 | 0.01847544  | transmembrane protein%2C putative (DUF247)                                             |
| AT5G19230 | 2.517490168 | 4.139631214 | 0.001611039 | 0.001777685 | Glycoprotein membrane precursor GPI-anchored                                           |
| AT2G17220 | 2.641954757 | 5.245427114 | 0.023360614 | 0.00299694  | Protein kinase superfamily protein                                                     |
| AT1G02360 | 14.55338082 | 30.29429822 | 0.002520153 | 0.014586849 | Chitinase family protein                                                               |
| AT3G07600 | 5.684301857 | 5.458767841 | 0.0011383   | 0.007964902 | Heavy metal transport/detoxification superfamily protein                               |
| AT4G23015 | 3.96722068  | 3.69168001  | 0.012736452 | 0.016723356 | transmembrane protein                                                                  |
| AT1G51620 | 7.293726858 | 12.54820653 | 0.026025145 | 0.005586744 | Protein kinase superfamily protein                                                     |
| AT5G19240 | 16.95065719 | 31.14133427 | 0.008086996 | 0.002978511 | Glycoprotein membrane precursor GPI-anchored                                           |
| AT5G16170 | 2.515244566 | 4.782211767 | 0.020185313 | 0.015417394 | Core-2/l-branching beta-1%2C6-N-acetylglucosaminyltransferase family protein           |
| AT2G37810 | 231.8605566 | 245.7954731 | 0.031385429 | 0.030839369 | Cysteine/Histidine-rich C1 domain family protein                                       |
| AT1G30757 | 11.27849326 | 16.74134607 | 0.014939325 | 0.039213223 | transmembrane protein                                                                  |
| AT4G29780 | 5.811570792 | 17.64701536 | 0.005252573 | 0.000644101 | nuclease                                                                               |
| AT4G14368 | #jDIV/0!    | #jDIV/0!    | 0.020916092 | 0.018710659 | Regulator of chromosome condensation (RCC1) family protein                             |
| AT3G10640 | 2.358707128 | 3.872997337 | 0.036404406 | 2.94605E-06 | SNF7 family protein                                                                    |
| AT3G25610 | 10.9296872  | 17.70748386 | 0.013712927 | 0.005126873 | ATPase E1-E2 type family protein / haloacid dehalogenase-like hydrolase family protein |
| AT2G26190 | 6.637616403 | 9.634439112 | 0.006900504 | 0.003268562 | calmodulin-binding family protein                                                      |
| AT3G46600 | 2.089249022 | 2.576080999 | 0.002148873 | 0.007203005 | GRAS family transcription factor                                                       |
| AT1G61550 | 12.9584335  | 34.01146418 | 0.000107728 | 0.010052508 | S-locus lectin protein kinase family protein                                           |
| AT1G73130 | 2.270634344 | 2.402314558 | 0.026126027 | 0.006278659 | mucin                                                                                  |
| AT2G13790 | 5.506307641 | 8.707841812 | 0.012880316 | 0.003252109 | somatic embryogenesis receptor-like kinase 4                                           |
| AT2G02860 | 2.69638138  | 3.671430111 | 0.002965752 | 0.013330956 | sucrose transporter 2                                                                  |
| AT4G18890 | 2.521795202 | 2.856387615 | 0.037744911 | 0.014795273 | BES1/BZR1 homolog 3                                                                    |
| AT1G72900 | 5.370022738 | 8.677496539 | 0.016177218 | 0.017802207 | Toll-Interleukin-Resistance (TIR) domain-containing protein                            |
| AT1G65490 | 2.027655806 | 2.191375367 | 0.034564163 | 0.001199948 | transmembrane protein                                                                  |
| AT1G26410 | 29.58558796 | 34.94490397 | 0.045845733 | 0.033853907 | FAD-binding Berberine family protein                                                   |

|           |             |             |             |             |                                                                   |
|-----------|-------------|-------------|-------------|-------------|-------------------------------------------------------------------|
| AT2G13800 | 6.547452381 | 8.962164425 | 0.01693044  | 0.016084306 | somatic embryogenesis receptor-like kinase 5                      |
| AT5G17680 | 2.112245629 | 4.489179965 | 0.026451296 | 0.000481537 | disease resistance protein (TIR-NBS-LRR class)                    |
| AT5G27760 | 2.188346126 | 2.934385984 | 0.001624754 | 7.87278E-05 | Hypoxia-responsive family protein                                 |
| AT1G19020 | 20.75028382 | 32.74104956 | 0.020340996 | 0.000464019 | CDP-diacylglycerol-glycerol-3-phosphate 3-phosphatidyltransferase |
| AT1G68765 | 7.933503104 | 48.26304144 | 0.038006805 | 0.019835811 | Putative membrane lipoprotein                                     |
| AT5G48530 | 10.46565202 | 11.24212433 | 0.019155724 | 0.013661169 | hypothetical protein                                              |
| AT1G14040 | 5.448802581 | 6.300154571 | 0.00246351  | 0.029909825 | EXS (ERD1/XPR1/SYG1) family protein                               |
| AT5G43420 | 11.17644799 | 21.50617683 | 0.017812759 | 0.004469183 | RING/U-box superfamily protein                                    |
| AT3G17410 | 2.00859881  | 2.804127716 | 0.007742508 | 0.001884427 | Protein kinase superfamily protein                                |
| AT4G01870 | 2.187002661 | 2.109432908 | 0.037000945 | 0.030965396 | tolB protein-like protein                                         |
| AT5G64120 | 4.177774053 | 6.736466624 | 0.004309729 | 0.005719932 | Peroxidase superfamily protein                                    |
| AT3G21070 | 8.468852754 | 17.65266339 | 0.014724323 | 0.00077294  | NAD kinase 1                                                      |
| AT1G16130 | 5.467001547 | 10.44049916 | 0.011747253 | 0.005868558 | wall associated kinase-like 2                                     |
| AT1G42980 | #jDIV/0!    | #jDIV/0!    | 0.046053735 | 0.004099803 | Actin-binding FH2 (formin homology 2) family protein              |
| AT4G23190 | 11.21531433 | 17.55067537 | 0.008956847 | 0.002769017 | cysteine-rich RLK (RECEPTOR-like protein kinase) 11               |
| AT2G33580 | 4.173922655 | 9.354522105 | 0.013583741 | 0.006536319 | Protein kinase superfamily protein                                |
| AT1G61360 | 10.20096243 | 22.90269416 | 0.007930558 | 0.025591205 | S-locus lectin protein kinase family protein                      |
| AT4G11280 | 8.693609638 | 12.18184313 | 0.008433899 | 0.005454683 | 1-aminocyclopropane-1-carboxylic acid (acc) synthase 6            |
| AT1G21110 | 23.76771325 | 29.99533151 | 0.010489821 | 0.0206728   | O-methyltransferase family protein                                |
| AT1G80610 | 2.660524192 | 3.874772595 | 0.005601313 | 0.001706914 | hypothetical protein                                              |
| AT3G17690 | 12.43553085 | 22.94493094 | 0.018926278 | 0.005979892 | cyclic nucleotide gated channel 19                                |
| AT5G45340 | 7.923886405 | 13.7431007  | 1.7763E-05  | 0.006743089 | cytochrome P450%2C family 707%2C subfamily A%2C polypeptide 3     |
| AT5G54810 | 2.08603135  | 3.355385357 | 0.009213692 | 0.012842725 | tryptophan synthase beta-subunit 1                                |
| AT2G22500 | 9.334082004 | 29.44715454 | 0.016770321 | 0.001845236 | uncoupling protein 5                                              |
| AT1G35210 | 30.85535095 | 116.7959012 | 0.026704643 | 0.001470689 | hypothetical protein                                              |
| AT2G15390 | 9.159986962 | 16.54491063 | 0.00849259  | 0.014031094 | fucosyltransferase 4                                              |
| AT1G17240 | 4.223943395 | 13.69462686 | 0.015653577 | 0.005498598 | receptor like protein 2                                           |
| AT2G24600 | 14.71325502 | 33.29803781 | 0.02430859  | 0.013742405 | Ankyrin repeat family protein                                     |
| AT4G04700 | 3.15361164  | 9.193923511 | 0.012183034 | 0.01461711  | calcium-dependent protein kinase 27                               |
| AT4G18250 | 44.84608704 | 53.14609834 | 0.028828255 | 0.004255295 | receptor Serine/Threonine kinase-like protein                     |
| AT5G58940 | 7.129491301 | 9.239581041 | 0.003710237 | 0.016413793 | calmodulin-binding receptor-like cytoplasmic kinase 1             |
| AT2G30870 | 2.320586181 | 2.822292539 | 0.027866594 | 0.008555404 | glutathione S-transferase PHI 10                                  |
| AT1G07135 | 12.17651609 | 35.29816998 | 0.034899682 | 0.000482425 | glycine-rich protein                                              |
| AT5G66620 | 3.998141392 | 11.33560017 | 0.02459415  | 2.54828E-07 | DA1-related protein 6                                             |
| AT4G25350 | 29.03468985 | 80.19551038 | 0.034020438 | 0.004409792 | EXS (ERD1/XPR1/SYG1) family protein                               |
| AT4G34460 | 2.440046165 | 6.137365847 | 0.022546381 | 0.007451597 | GTP binding protein beta 1                                        |
| AT1G66090 | 35.39267979 | 126.7212026 | 0.0375      | 0.011302748 | Disease resistance protein (TIR-NBS class)                        |
| AT5G44060 | 3.169356323 | 5.594237672 | 0.023329458 | 0.014792471 | embryo sac development arrest protein                             |
| AT5G42440 | 3.198659765 | 4.267987681 | 0.004004561 | 0.000261324 | Protein kinase superfamily protein                                |
| AT1G28380 | 4.435399258 | 6.71308802  | 0.013033625 | 0.001115902 | MAC/Perforin domain-containing protein                            |

|           |             |             |             |             |                                                              |
|-----------|-------------|-------------|-------------|-------------|--------------------------------------------------------------|
| AT3G23250 | 5.066329973 | 8.649314181 | 0.022767037 | 0.029698269 | myb domain protein 15                                        |
| AT5G41550 | 7.526673506 | 21.61654854 | 0.00449266  | 0.02055941  | Disease resistance protein (TIR-NBS-LRR class) family        |
| AT2G30020 | 2.431042639 | 5.435578758 | 0.000681193 | 0.004201895 | Protein phosphatase 2C family protein                        |
| AT1G70530 | 3.18844789  | 3.380653689 | 0.001407442 | 0.001275096 | cysteine-rich RLK (RECEPTOR-like protein kinase) 3           |
| AT5G20480 | 2.671975782 | 4.057514664 | 0.003035782 | 0.005758506 | EF-TU receptor                                               |
| AT3G62150 | 2.142485751 | 2.886527713 | 0.003791158 | 0.010519166 | P-glycoprotein 21                                            |
| AT4G15120 | 2.149315176 | 2.15921208  | 0.033427601 | 0.046934869 | VQ motif-containing protein                                  |
| AT5G02290 | 3.499806257 | 5.457476642 | 0.011081671 | 0.000571764 | Protein kinase superfamily protein                           |
| AT4G25810 | 2.011009042 | 3.979502005 | 0.017563627 | 0.017411218 | xyloglucan endotransglycosylase 6                            |
| AT3G20510 | 2.010935324 | 4.314144524 | 0.000737756 | 0.004182923 | Transmembrane proteins 14C                                   |
| AT2G27310 | 2.400238311 | 2.988529075 | 0.018082608 | 0.030167816 | F-box family protein                                         |
| AT1G61420 | 3.459865615 | 3.626292099 | 0.019074009 | 0.001027109 | S-locus lectin protein kinase family protein                 |
| AT5G45090 | #jDIV/0!    | #jDIV/0!    | 0.004650251 | 0.00897147  | phloem protein 2-A7                                          |
| AT5G44568 | 5.062306537 | 6.267577103 | 0.009985784 | 0.012036083 | transmembrane protein                                        |
| AT2G36770 | 3.35914467  | 5.22665944  | 0.003166198 | 0.00988777  | UDP-Glycosyltransferase superfamily protein                  |
| AT1G57630 | 6.116558278 | 21.4952161  | 0.01756494  | 0.000283763 | Toll-Interleukin-Resistance (TIR) domain family protein      |
| AT5G66480 | 2.597014433 | 3.578334455 | 0.030589563 | 0.037737729 | bacteriophage N4 adsorption B protein                        |
| AT1G73805 | 6.347854958 | 10.85991203 | 0.000646213 | 0.007821003 | Calmodulin binding protein-like protein                      |
| AT3G25600 | 2.757126646 | 6.249557263 | 0.002332695 | 7.99531E-06 | Calcium-binding EF-hand family protein                       |
| AT5G66070 | 3.560473046 | 6.847473692 | 0.033057071 | 0.010358889 | RING/U-box superfamily protein                               |
| AT1G08930 | 3.237137596 | 5.711243033 | 0.007822532 | 0.014236739 | Major facilitator superfamily protein                        |
| AT5G04340 | 5.913513576 | 11.84923323 | 0.003651715 | 0.014949423 | Zinc finger protein ZAT6                                     |
| AT1G51800 | 5.729007926 | 10.02853647 | 0.018877067 | 0.002600093 | Leucine-rich repeat protein kinase family protein            |
| AT5G01100 | 9.209365972 | 20.02406487 | 0.039006806 | 0.001492367 | O-fucosyltransferase family protein                          |
| AT4G29050 | 3.597749485 | 6.561130549 | 0.00319221  | 0.018497798 | Concanavalin A-like lectin protein kinase family protein     |
| AT5G46500 | 4.375646307 | 5.044369847 | 0.035035578 | 0.014761599 | protein VARIATION IN COMPOUND TRIGGERED ROOT growth protein  |
| AT4G14610 | 3.021101733 | 4.468346505 | 0.002114096 | 0.009169619 | NA                                                           |
| AT3G63350 | 3.178235811 | 4.710885137 | 0.000794651 | 0.044281915 | winged-helix DNA-binding transcription factor family protein |
| AT4G11230 | 3.069003841 | 3.375937997 | 0.039228484 | 0.005211633 | Riboflavin synthase-like superfamily protein                 |
| AT4G29740 | 4.845510015 | 5.699248719 | 0.013727897 | 0.004149485 | cytokinin oxidase 4                                          |
| AT5G44870 | 2.411367676 | 3.368449084 | 0.032421365 | 0.000662954 | Disease resistance protein (TIR-NBS-LRR class) family        |
| AT1G02930 | 5.413972624 | 8.929763132 | 0.013053663 | 0.009759027 | glutathione S-transferase 6                                  |
| AT1G43000 | 35.52734381 | 161.0777455 | 0.024923447 | 0.011609024 | PLATZ transcription factor family protein                    |
| AT2G17050 | 19.34432165 | 20.34412312 | 0.029134006 | 0.010861697 | disease resistance protein (TIR-NBS-LRR class)               |
| AT1G06137 | 10.37413716 | 54.79868377 | 0.040009245 | 0.016156578 | transmembrane protein                                        |
| AT1G74650 | 6.268779527 | 11.56329351 | 0.018774293 | 0.003932352 | myb domain protein 31                                        |
| AT5G67420 | 4.24648079  | 2.589218101 | 0.000721429 | 0.003843656 | LOB domain-containing protein 37                             |
| AT3G50950 | 3.989260929 | 7.948524851 | 0.011453885 | 0.003504144 | HOPZ-ACTIVATED RESISTANCE 1                                  |
| AT2G47550 | 3.189718824 | 7.103214222 | 0.014617996 | 0.030490657 | Plant invertase/pectin methylesterase inhibitor superfamily  |
| AT4G38545 | 3.035405567 | 3.821982444 | 0.031917234 | 0.007010052 | NA                                                           |

|           |             |             |             |             |                                                                            |
|-----------|-------------|-------------|-------------|-------------|----------------------------------------------------------------------------|
| AT2G13650 | 2.038018158 | 3.356939804 | 0.033678018 | 0.001092165 | golgi nucleotide sugar transporter 1                                       |
| AT1G65845 | 3.163067139 | 4.657949666 | 0.030961175 | 0.005612713 | transmembrane protein                                                      |
| AT5G58430 | 2.811137526 | 4.83364483  | 0.008911689 | 0.002808175 | exocyst subunit exo70 family protein B1                                    |
| AT3G15356 | 9.760635739 | 13.80005243 | 0.033241277 | 0.000873951 | Legume lectin family protein                                               |
| AT1G61430 | 2.011935794 | 2.174134163 | 0.033902398 | 0.010430284 | S-locus lectin protein kinase family protein                               |
| AT2G46940 | 4.866240813 | 8.978675436 | 0.015554079 | 0.006746153 | fold protein                                                               |
| AT4G25719 | 5.088262493 | 8.286520902 | 0.006374237 | 0.013712654 | NA                                                                         |
| AT1G21130 | 6.281167911 | 9.109519894 | 0.009651276 | 0.016484719 | O-methyltransferase family protein                                         |
| AT1G59910 | 3.914148536 | 7.910364246 | 0.018603643 | 0.003897911 | Actin-binding FH2 (formin homology 2) family protein                       |
| AT3G46280 | 3.301258484 | 4.629007538 | 0.017468898 | 0.006984298 | kinase-like protein                                                        |
| AT5G25440 | 2.138211093 | 4.217358732 | 0.034500152 | 6.53968E-05 | Protein kinase superfamily protein                                         |
| AT5G48430 | 10.28648282 | 10.82276517 | 0.00032454  | 0.027673396 | Eukaryotic aspartyl protease family protein                                |
| AT1G75000 | 2.736364464 | 5.916545307 | 0.024280873 | 0.0001979   | GNS1/SUR4 membrane protein family                                          |
| AT5G40540 | 3.091469433 | 4.460917353 | 0.020954951 | 0.001275177 | Protein kinase superfamily protein                                         |
| AT5G56610 | 2.365648217 | 2.682341795 | 0.034552998 | 0.017937733 | Phosphotyrosine protein phosphatases superfamily protein                   |
| AT4G01250 | 4.228497967 | 8.049133773 | 0.018035717 | 0.004040131 | WRKY family transcription factor                                           |
| AT1G62422 | 2.058844216 | 2.342064117 | 0.002160339 | 0.006774244 | hypothetical protein                                                       |
| AT2G11520 | 2.051625138 | 2.921678121 | 0.003628606 | 0.000223628 | calmodulin-binding receptor-like cytoplasmic kinase 3                      |
| AT1G17147 | 32.89320658 | 47.12358641 | 0.026002771 | 0.00162999  | VQ motif-containing protein                                                |
| AT4G16957 | 4.563186816 | 6.72542758  | 0.013934123 | 0.02828129  | SUPPRESSOR OF%2C CONSTITUTIVE protein                                      |
| AT1G30730 | 4.208942703 | 5.695767682 | 0.01411002  | 0.016740867 | FAD-binding Berberine family protein                                       |
| AT2G28940 | 2.478774028 | 3.056584791 | 0.025009729 | 0.014093212 | Protein kinase superfamily protein                                         |
| AT5G43520 | 6.820239156 | 3.661515828 | 0.013606489 | 0.043516288 | Cysteine/Histidine-rich C1 domain family protein                           |
| AT2G40140 | 6.753076168 | 17.87307056 | 0.008732937 | 6.13006E-05 | zinc finger (CCCH-type) family protein                                     |
| AT3G25900 | 2.575318071 | 3.482366768 | 0.046291631 | 0.002078614 | Homocysteine S-methyltransferase family protein                            |
| AT1G02920 | 7.857899969 | 11.10365635 | 0.013042055 | 0.024486042 | glutathione S-transferase 7                                                |
| AT1G13530 | 3.557972736 | 4.361522231 | 0.003730549 | 0.02933605  | hypothetical protein (DUF1262)                                             |
| AT2G46160 | 2.479212298 | 3.389198808 | 0.008076219 | 0.035070072 | RING/U-box superfamily protein                                             |
| AT4G13510 | 2.076513478 | 2.935341581 | 0.015889371 | 0.000450551 | ammonium transporter 1%3B1                                                 |
| AT1G63740 | 2.435702964 | 4.084194505 | 0.018262689 | 0.005543285 | Disease resistance protein (TIR-NBS-LRR class) family                      |
| AT1G80450 | 2.632045541 | 5.107517192 | 0.041373691 | 0.000631022 | VQ motif-containing protein                                                |
| AT4G30530 | 2.271775584 | 2.392396973 | 0.01799355  | 0.034092221 | Class I glutamine amidotransferase-like superfamily protein                |
| AT1G14870 | 7.170171575 | 13.24360268 | 0.001277544 | 0.004130521 | PLANT CADMIUM RESISTANCE 2                                                 |
| AT4G24970 | 2.431762749 | 2.701682505 | 0.0137397   | 0.008039427 | Histidine kinase-%2C DNA gyrase B-%2C and HSP90-like ATPase family protein |
| AT1G15530 | 2.537334036 | 3.555023443 | 0.032119584 | 0.002124991 | Concanavalin A-like lectin protein kinase family protein                   |
| AT5G57220 | 49.71036984 | 96.16200915 | 0.016510873 | 0.002077479 | cytochrome P450%2C family 81%2C subfamily F%2C polypeptide 2               |
| AT4G14450 | 16.89268995 | 44.72158489 | 0.019341021 | 0.007329465 | hypothetical protein                                                       |
| AT5G67450 | 10.52342639 | 21.78449634 | 4.69854E-06 | 0.004540506 | zinc-finger protein 1                                                      |
| AT1G20350 | 2.409303363 | 2.818200365 | 0.002248871 | 0.006001888 | translocase inner membrane subunit 17-1                                    |
| AT1G25390 | 4.379933538 | 5.589065753 | 0.013346557 | 0.001493594 | Protein kinase superfamily protein                                         |

|           |             |             |             |             |                                                                         |
|-----------|-------------|-------------|-------------|-------------|-------------------------------------------------------------------------|
| AT2G17740 | 20.83644824 | 26.72228342 | 0.001861024 | 0.021229481 | Cysteine/Histidine-rich C1 domain family protein                        |
| AT1G34420 | 3.143943378 | 6.690595923 | 0.001396886 | 0.024133887 | leucine-rich repeat transmembrane protein kinase family protein         |
| AT1G65500 | 2.395650582 | 3.601044218 | 0.001546505 | 0.010970928 | transmembrane protein                                                   |
| AT4G14365 | 18.82308352 | 56.78988436 | 0.022596776 | 0.001579922 | hypothetical protein                                                    |
| AT3G45840 | 2.356295763 | 2.422572943 | 0.012332181 | 0.021284102 | Cysteine/Histidine-rich C1 domain family protein                        |
| AT1G69840 | 2.465996367 | 4.091924593 | 0.011170783 | 0.00188268  | SPFH/Band 7/PHB domain-containing membrane-associated protein family    |
| AT3G45960 | 5.091032678 | 8.748741202 | 0.01044957  | 0.024572272 | expansin-like A3                                                        |
| AT5G61210 | 2.986041766 | 7.014267091 | 0.016980066 | 0.006610569 | soluble N-ethylmaleimide-sensitive factor adaptor protein 33            |
| AT3G09010 | 5.428338605 | 6.643452762 | 0.019309742 | 0.019919339 | Protein kinase superfamily protein                                      |
| AT3G09405 | 4.764820429 | 5.748106142 | 0.038163593 | 3.99018E-05 | Pectinacetylesterase family protein                                     |
| AT5G66900 | 2.111418629 | 4.068398574 | 0.016711921 | 5.45093E-05 | Disease resistance protein (CC-NBS-LRR class) family                    |
| AT4G39570 | 4.366645484 | 9.183772987 | 0.039833472 | 0.02486707  | Galactose oxidase/kelch repeat superfamily protein                      |
| AT5G20230 | 2.571024997 | 4.144938382 | 0.001416862 | 0.001888303 | blue-copper-binding protein                                             |
| AT4G40020 | 19.33835117 | 22.90084014 | 1.90259E-05 | 0.014405584 | Myosin heavy chain-related protein                                      |
| AT5G01550 | 16.516182   | 40.3300477  | 0.010004125 | 0.000306023 | lectin receptor kinase a4.1                                             |
| AT2G36690 | 3.368106111 | 12.04237832 | 0.014334913 | 0.011703403 | 2-oxoglutarate (2OG) and Fe(II)-dependent oxygenase superfamily protein |
| AT5G26030 | 4.011294222 | 7.604250483 | 0.006553103 | 0.006446332 | ferrochelatase 1                                                        |
| AT1G65850 | 7.581642148 | 14.85911296 | 0.001914428 | 1.57604E-05 | Disease resistance protein (TIR-NBS-LRR class) family                   |
| AT5G23510 | 8.124051953 | 8.103948804 | 0.020669717 | 0.004186905 | hypothetical protein                                                    |
| AT1G08050 | 3.204119879 | 7.657961555 | 0.027254238 | 8.37659E-07 | Zinc finger (C3HC4-type RING finger) family protein                     |
| AT2G28400 | 4.350711652 | 5.488595482 | 0.040828477 | 0.004252587 | senescence regulator (Protein of unknown function%2C DUF584)            |
| AT4G24920 | 2.107759472 | 2.084814651 | 0.018253907 | 0.0193618   | secE/sec61-gamma protein transport protein                              |
| AT2G32030 | 15.25352945 | 36.87640772 | 0.012555091 | 0.004079854 | Acyl-CoA N-acyltransferases (NAT) superfamily protein                   |
| AT4G27970 | 3.986066075 | 4.60676775  | 0.027839092 | 0.011676153 | SLAC1 homologue 2                                                       |
| AT1G16120 | 3.885109583 | 5.624884432 | 0.017060551 | 0.00027736  | wall associated kinase-like 1                                           |
| AT5G63130 | 5.219106155 | 6.192895175 | 0.015937775 | 0.001760733 | Octicosapeptide/Phox/Bem1p family protein                               |
| AT1G35350 | 2.017544126 | 2.560232299 | 0.022173519 | 0.009885969 | EXS (ERD1/XPR1/SYG1) family protein                                     |
| AT1G53430 | 2.923530118 | 3.576009142 | 0.000741474 | 0.000480079 | Leucine-rich repeat transmembrane protein kinase                        |
| AT5G55560 | 2.733012975 | 2.69981152  | 0.018851699 | 7.581E-05   | Protein kinase superfamily protein                                      |
| AT1G08940 | 2.188455445 | 2.340708338 | 0.001075735 | 0.00631494  | Phosphoglycerate mutase family protein                                  |
| AT4G08850 | 5.627478474 | 8.321139063 | 0.00740346  | 0.022166677 | Leucine-rich repeat receptor-like protein kinase family protein         |
| AT3G04110 | 2.223602466 | 3.399857378 | 0.007018135 | 0.010556765 | glutamate receptor 1.1                                                  |
| AT3G03855 | 2.612871733 | 4.658967963 | 0.002627845 | 0.000815653 | NA                                                                      |
| AT2G47130 | 4.227374018 | 4.107170732 | 1.48795E-06 | 0.002093928 | NAD(P)-binding Rossmann-fold superfamily protein                        |
| AT5G25910 | 8.283062591 | 9.556116097 | 6.8038E-05  | 0.002663416 | receptor like protein 52                                                |
| AT1G56140 | 4.798093078 | 7.215780721 | 0.009886797 | 0.003341671 | Leucine-rich repeat transmembrane protein kinase                        |
| AT3G47090 | 6.933876021 | 5.83913741  | 0.001800935 | 0.048118976 | Leucine-rich repeat protein kinase family protein                       |
| AT1G03370 | 3.714104223 | 7.629228553 | 0.007759657 | 0.000450826 | C2 calcium/lipid-binding and GRAM domain containing protein             |
| AT3G14870 | 2.070184372 | 2.945419302 | 0.022727993 | 0.006632254 | hypothetical protein (DUF641)                                           |
| AT3G50900 | 2.758668752 | 2.789368784 | 0.002989835 | 0.007816118 | hypothetical protein                                                    |



|           |             |             |             |             |                                                                                |
|-----------|-------------|-------------|-------------|-------------|--------------------------------------------------------------------------------|
| AT4G24380 | 2.647460271 | 3.685504564 | 0.02896663  | 0.000997177 | dihydrofolate reductase                                                        |
| AT5G35735 | 9.471837468 | 27.13899003 | 0.020809714 | 0.00416424  | Auxin-responsive family protein                                                |
| AT5G47220 | 2.473688793 | 2.406301218 | 0.009292996 | 0.017923927 | ethylene responsive element binding factor 2                                   |
| AT5G06230 | 4.562493975 | 5.336045417 | 0.049712513 | 0.001303403 | TRICHOME BIREFRINGENCE-LIKE 9                                                  |
| AT1G08450 | 2.049525965 | 2.627822609 | 0.000294606 | 0.002970957 | calreticulin 3                                                                 |
| AT4G38540 | 2.636559144 | 2.448091752 | 0.000707322 | 0.003575896 | FAD/NAD(P)-binding oxidoreductase family protein                               |
| AT3G19010 | 5.071269578 | 6.372072552 | 0.008253151 | 0.012141975 | 2-oxoglutarate (2OG) and Fe(II)-dependent oxygenase superfamily protein        |
| AT1G30370 | 27.48550386 | 55.75828149 | 0.017363293 | 0.000390798 | alpha/beta-Hydrolases superfamily protein                                      |
| AT1G61820 | 2.175271793 | 2.962091921 | 0.027850756 | 0.038647042 | beta glucosidase 46                                                            |
| AT2G35658 | 18.79624487 | 44.61524766 | 0.040977965 | 0.006353902 | transmembrane protein                                                          |
| AT3G26910 | 6.545146826 | 7.748943253 | 0.005643342 | 0.001688312 | hydroxyproline-rich glycoprotein family protein                                |
| AT5G46520 | 4.442048246 | 8.555915819 | 0.013141472 | 0.010238863 | Disease resistance protein (TIR-NBS-LRR class) family                          |
| AT4G23810 | 14.9818364  | 29.55104122 | 0.004669108 | 0.012448821 | WRKY family transcription factor                                               |
| AT3G21520 | 22.24668793 | 79.46920115 | 0.008816612 | 0.002536422 | transmembrane protein%2C putative (DUF679 domain membrane protein 1)           |
| AT1G64065 | 6.103799834 | 16.86663183 | 0.045233298 | 0.002748318 | Late embryogenesis abundant (LEA) hydroxyproline-rich glycoprotein family      |
| AT4G30280 | 5.245219401 | 10.56086643 | 0.031935964 | 0.002517986 | xyloglucan endotransglucosylase/hydrolase 18                                   |
| AT5G47910 | 5.232946799 | 8.62862038  | 0.007656556 | 0.022274664 | respiratory burst oxidase homologue D                                          |
| AT1G24140 | 27.79377176 | 89.52231663 | 0.037032347 | 0.002874474 | Matrixin family protein                                                        |
| AT1G61370 | 4.109258156 | 5.041135214 | 0.000105879 | 0.007781284 | S-locus lectin protein kinase family protein                                   |
| AT1G66480 | 2.781174301 | 3.543536933 | 0.000489063 | 0.027181023 | plastid movement impaired 2                                                    |
| AT4G11480 | #jDIV/0!    | #jDIV/0!    | 0.02085372  | 0.048054821 | cysteine-rich RLK (RECEPTOR-like protein kinase) 32                            |
| AT3G59310 | 2.482993886 | 3.471221863 | 0.005447591 | 0.005835043 | solute carrier family 35 protein (DUF914)                                      |
| AT1G09940 | 3.928703705 | 8.717564275 | 0.048836002 | 0.001640424 | Glutamyl-tRNA reductase family protein                                         |
| AT4G36500 | 12.89385955 | 19.37682745 | 0.021836562 | 0.003862932 | hypothetical protein                                                           |
| AT1G75020 | 2.376667393 | 3.530406308 | 0.006013581 | 0.002679702 | lysophosphatidyl acyltransferase 4                                             |
| AT1G67520 | 9.252664543 | 8.060878513 | 0.007007583 | 0.048420477 | lectin protein kinase family protein                                           |
| AT3G55950 | 3.797433163 | 5.807597779 | 0.020289932 | 2.98267E-05 | CRINKLY4 related 3                                                             |
| AT1G20515 | 2.57471522  | 3.677451931 | 0.037599332 | 0.007145872 | NA                                                                             |
| AT3G19020 | 2.293442551 | 2.411480195 | 0.002746395 | 0.002223911 | Leucine-rich repeat (LRR) family protein                                       |
| AT1G25370 | 2.219400924 | 4.65740731  | 0.04751358  | 0.018521486 | hypothetical protein (DUF1639)                                                 |
| AT2G22890 | 3.30514014  | 5.226717087 | 0.032906401 | 0.021352699 | Kua-ubiquitin conjugating enzyme hybrid localization domain-containing protein |
| AT4G21390 | 16.6695869  | 26.57728012 | 0.021598479 | 0.009195528 | S-locus lectin protein kinase family protein                                   |
| AT1G25400 | 2.346884795 | 3.876310005 | 0.017543216 | 0.001678615 | transmembrane protein                                                          |
| AT3G29000 | 65.86627652 | 234.5765346 | 0.000435654 | 0.00512054  | Calcium-binding EF-hand family protein                                         |
| AT3G06370 | 2.221719718 | 2.236355218 | 0.026316078 | 0.026596925 | sodium hydrogen exchanger 4                                                    |
| AT2G41100 | 3.432601522 | 5.619403885 | 0.010249349 | 0.000896238 | Calcium-binding EF hand family protein                                         |
| AT1G62300 | 6.843918926 | 11.43481865 | 0.013328341 | 0.016269369 | WRKY family transcription factor                                               |
| AT1G63720 | 3.164254219 | 5.453596237 | 0.003563146 | 4.17432E-06 | hydroxyproline-rich glycoprotein family protein                                |
| AT1G72280 | 4.180070516 | 5.961754917 | 0.014521556 | 0.014538701 | endoplasmic reticulum oxidoreductins 1                                         |
| AT5G39970 | 2.790410798 | 2.455929252 | 0.031772676 | 0.003121459 | catalytics                                                                     |

|           |             |             |             |             |                                                                             |
|-----------|-------------|-------------|-------------|-------------|-----------------------------------------------------------------------------|
| AT5G02690 | 5.07584411  | 6.731402788 | 0.011115665 | 0.005516718 | hypothetical protein                                                        |
| AT5G40920 | 2.627752891 | 3.212846597 | 0.000160775 | 5.59748E-05 | NA                                                                          |
| AT5G26920 | 11.10123586 | 38.50831712 | 0.020967278 | 0.001478427 | Cam-binding protein 60-like G                                               |
| AT4G23215 | 27.91661584 | 50.23213166 | 0.039420785 | 0.008649265 | NA                                                                          |
| AT3G47540 | 2.936203979 | 3.168358256 | 0.015563491 | 0.015522352 | Chitinase family protein                                                    |
| AT5G39785 | 2.05037909  | 3.335902672 | 0.009160483 | 0.00083789  | hypothetical protein (DUF1666)                                              |
| AT2G44490 | 6.611958187 | 10.33746674 | 0.005423182 | 0.007379783 | Glycosyl hydrolase superfamily protein                                      |
| AT4G22470 | 3.469064134 | 5.008732994 | 0.009113359 | 0.017583021 | protease inhibitor/seed storage/lipid transfer protein (LTP) family protein |
| AT4G23270 | 3.33723727  | 4.559146282 | 0.002449863 | 0.001799436 | cysteine-rich RLK (RECEPTOR-like protein kinase) 19                         |
| AT3G59080 | 3.459880861 | 6.124857903 | 0.006298129 | 0.001750048 | Eukaryotic aspartyl protease family protein                                 |
| AT1G78410 | 42.42590706 | 49.31833851 | 0.006268108 | 0.005090197 | VQ motif-containing protein                                                 |
| AT1G24150 | 7.67332197  | 12.44725091 | 0.015763556 | 0.003355371 | formin homologue 4                                                          |
| AT1G69890 | 4.408285805 | 8.776304884 | 0.029120912 | 0.005754911 | actin cross-linking protein (DUF569)                                        |
| AT3G55450 | 2.569932423 | 4.086518925 | 0.001279556 | 0.000197086 | PBS1-like 1                                                                 |
| AT1G36640 | #jDIV/0!    | #jDIV/0!    | 0.027454977 | 0.044589794 | transmembrane protein                                                       |
| AT4G19920 | 5.180336274 | 4.667701471 | 0.003604015 | 0.015931119 | Toll-Interleukin-Resistance (TIR) domain family protein                     |
| AT3G21781 | 8.311625587 | 13.6121367  | 0.021745002 | 0.001119572 | NA                                                                          |
| AT1G55365 | 5.160402585 | 8.518151739 | 0.007923054 | 0.00171869  | hypothetical protein                                                        |
| AT1G65690 | 4.668634565 | 9.48569888  | 0.004113638 | 0.045361315 | Late embryogenesis abundant (LEA) hydroxyproline-rich glycoprotein family   |
| AT5G39670 | 25.91366122 | 57.11411916 | 0.008767966 | 0.000364018 | Calcium-binding EF-hand family protein                                      |
| AT3G61190 | 7.74975943  | 22.44797071 | 0.009304403 | 0.010192635 | BON association protein 1                                                   |
| AT3G57640 | 4.405658628 | 9.868360548 | 0.034556519 | 0.007255155 | Protein kinase superfamily protein                                          |
| AT2G47060 | 3.361282331 | 5.357681807 | 0.012040988 | 0.005580474 | Protein kinase superfamily protein                                          |
| AT4G14680 | 2.487247914 | 3.101301441 | 0.030614468 | 0.022655776 | Pseudouridine synthase/archaeosine transglycosylase-like family protein     |
| AT1G34260 | 2.397474341 | 5.843734209 | 0.033651551 | 4.2666E-06  | FORMS APLOID AND BINUCLEATE CELLS 1A                                        |
| AT1G55920 | 2.44956807  | 2.234255577 | 0.005698522 | 0.002609463 | serine acetyltransferase 2%3B1                                              |
| AT5G62770 | 2.065584183 | 2.509627188 | 0.00041289  | 0.024107806 | membrane-associated kinase regulator%2C putative (DUF1645)                  |
| AT1G09932 | 11.07581816 | 24.28282774 | 0.027517901 | 0.005563094 | Phosphoglycerate mutase family protein                                      |
| AT2G35930 | 11.59545838 | 16.41169552 | 0.014155736 | 0.007252766 | plant U-box 23                                                              |
| AT1G69930 | 6.35154947  | 13.45971187 | 0.038242512 | 0.015441269 | glutathione S-transferase TAU 11                                            |
| AT4G28400 | 2.322508336 | 3.841517402 | 0.001928056 | 0.002428931 | Protein phosphatase 2C family protein                                       |
| AT3G57280 | 2.133164381 | 3.303915091 | 0.004303767 | 5.79688E-05 | Transmembrane proteins 14C                                                  |
| AT2G41730 | 2.835696    | 2.218545851 | 0.030646968 | 0.002169736 | calcium-binding site protein                                                |
| AT4G32020 | 2.365656793 | 3.673930914 | 0.000137817 | 0.000726613 | serine/arginine repetitive matrix-like protein                              |
| AT5G61560 | 4.562509671 | 7.81601701  | 0.048569524 | 0.006520658 | U-box domain-containing protein kinase family protein                       |
| AT3G50930 | 14.09433961 | 45.51546414 | 0.021327542 | 0.007520031 | cytochrome BC1 synthase                                                     |
| AT4G30430 | 6.532198907 | 28.98067954 | 0.001668922 | 0.005705089 | tetraspanin9                                                                |
| AT5G18490 | 2.335179552 | 2.959574146 | 0.010352617 | 0.007433732 | vacuolar sorting-associated protein (DUF946)                                |
| AT1G17420 | 7.090146372 | 19.40111366 | 0.035083278 | 0.033387361 | lipooxygenase 3                                                             |
| AT1G73080 | 2.725074494 | 3.846634979 | 0.021932099 | 0.017214325 | PEP1 receptor 1                                                             |

|           |             |             |             |             |                                                                           |
|-----------|-------------|-------------|-------------|-------------|---------------------------------------------------------------------------|
| AT3G23240 | 2.372831997 | 2.046229811 | 0.032767106 | 0.019189347 | ethylene response factor 1                                                |
| AT5G49770 | 4.262579483 | 3.334693959 | 0.036467717 | 0.029599019 | Leucine-rich repeat protein kinase family protein                         |
| AT4G19370 | 6.483886929 | 6.902739998 | 0.017575661 | 0.009797892 | chitin synthase%2C putative (DUF1218)                                     |
| AT1G55450 | 13.78071439 | 25.20559573 | 0.012582516 | 0.016844948 | S-adenosyl-L-methionine-dependent methyltransferases superfamily protein  |
| AT5G08240 | 2.832766033 | 3.642037546 | 0.010540535 | 0.004891739 | transmembrane protein                                                     |
| AT2G26410 | 3.91524173  | 4.190890591 | 0.011565424 | 0.013001387 | IQ-domain 4                                                               |
| AT5G48380 | 5.00132348  | 9.956380736 | 0.015235519 | 0.00224314  | BAK1-interacting receptor-like kinase 1                                   |
| AT2G44578 | 19.98394895 | 26.18617835 | 0.002533424 | 0.010827937 | RING/U-box superfamily protein                                            |
| AT5G39000 | 3.718753262 | 4.15352977  | 0.000696193 | 0.010279473 | Malectin/receptor-like protein kinase family protein                      |
| AT1G79670 | 2.268744685 | 2.408169668 | 0.005291187 | 0.002241977 | Wall-associated kinase family protein                                     |
| AT2G44010 | 2.123298955 | 2.242430117 | 0.017857939 | 0.016805319 | hypothetical protein                                                      |
| AT5G54860 | 4.285713394 | 7.518698934 | 0.023770565 | 0.002116328 | Major facilitator superfamily protein                                     |
| AT2G25735 | 13.4098057  | 25.1917383  | 0.020376    | 0.002260286 | hypothetical protein                                                      |
| AT3G52520 | 5.672887609 | 12.52154937 | 0.025731294 | 0.002297674 | hypothetical protein                                                      |
| AT5G57035 | 3.001760999 | 4.507683169 | 0.022868099 | 0.008391546 | U-box domain-containing protein kinase family protein                     |
| AT5G60900 | 11.54743108 | 19.62300065 | 0.026964657 | 0.003385693 | receptor-like protein kinase 1                                            |
| AT4G02410 | 6.207460247 | 8.974149656 | 0.000801002 | 0.011751109 | Concanavalin A-like lectin protein kinase family protein                  |
| AT5G64905 | 100.7661603 | 154.6342732 | 0.008653593 | 0.017311267 | elicitor peptide 3 precursor                                              |
| AT2G25409 | #jDIV/0!    | #jDIV/0!    | 0.022628538 | 0.04326495  | hypothetical protein                                                      |
| AT4G23010 | 2.4567229   | 2.80214773  | 0.003651607 | 0.004661997 | UDP-galactose transporter 2                                               |
| AT5G22530 | 14.57609771 | 33.23629812 | 0.025396999 | 0.000783162 | hypothetical protein                                                      |
| AT2G46400 | 5.630173006 | 16.22822865 | 0.003437773 | 0.023310506 | WRKY DNA-binding protein 46                                               |
| AT1G67800 | 3.57096883  | 6.935994464 | 0.000952058 | 0.003715093 | Copine (Calcium-dependent phospholipid-binding protein) family            |
| AT4G27280 | 6.076886043 | 15.75564729 | 0.015289526 | 0.004592753 | Calcium-binding EF-hand family protein                                    |
| AT1G14780 | 2.123577285 | 3.408920076 | 0.001797894 | 0.00778459  | MAC/Perforin domain-containing protein                                    |
| AT1G79245 | 2.946178525 | 3.087342225 | 0.005339571 | 0.000227271 | NA                                                                        |
| AT4G00330 | 2.05081565  | 2.266367165 | 0.009335811 | 0.000154657 | calmodulin-binding receptor-like cytoplasmic kinase 2                     |
| AT2G04500 | 3.006250007 | 6.580907384 | 0.00672324  | 0.000422091 | Cysteine/Histidine-rich C1 domain family protein                          |
| AT5G01950 | 2.930677334 | 4.012672485 | 0.016480964 | 0.014816014 | Leucine-rich repeat protein kinase family protein                         |
| AT2G38470 | 14.30656896 | 27.10452086 | 0.002953143 | 0.00293736  | WRKY DNA-binding protein 33                                               |
| AT4G20830 | 5.854242366 | 10.44531181 | 0.009504923 | 0.003588229 | FAD-binding Berberine family protein                                      |
| AT5G10410 | 4.471890181 | 2.434167905 | 0.005806274 | 0.031121656 | ENTH/ANTH/VHS superfamily protein                                         |
| AT3G27010 | 2.082087694 | 2.140970779 | 0.00927996  | 0.001129667 | TEOSINTE BRANCHED 1%2C cycloidea%2C PCF (TCP)-domain family protein 20    |
| AT4G21920 | 13.41589    | 11.81922914 | 0.02989371  | 0.026797136 | hypothetical protein                                                      |
| AT2G39210 | 4.367281386 | 4.484438405 | 0.018840416 | 0.007732626 | Major facilitator superfamily protein                                     |
| AT3G03125 | 7.525904049 | 6.383808462 | 0.018499084 | 0.030696153 | NA                                                                        |
| AT2G01340 | 2.254632717 | 2.647355497 | 0.007284412 | 0.042851759 | plastid movement impaired protein                                         |
| AT4G04075 | 8.171315975 | 20.45623286 | 0.01823823  | 0.00705809  | NA                                                                        |
| AT3G20600 | 2.822346456 | 6.230749721 | 0.011396496 | 0.000369368 | Late embryogenesis abundant (LEA) hydroxyproline-rich glycoprotein family |
| AT1G64010 | 3.176242633 | 6.733276123 | 0.00011125  | 0.039506411 | Serine protease inhibitor (SERPIN) family protein                         |

|           |             |             |             |             |                                                                          |
|-----------|-------------|-------------|-------------|-------------|--------------------------------------------------------------------------|
| AT1G18570 | 18.09045876 | 23.5523128  | 0.003596581 | 0.001830428 | myb domain protein 51                                                    |
| AT5G37490 | 41.58456108 | 75.51597531 | 0.012173302 | 0.02059261  | ARM repeat superfamily protein                                           |
| AT4G23130 | 3.670553977 | 3.72389072  | 0.002002591 | 0.016828222 | cysteine-rich RLK (RECEPTOR-like protein kinase) 5                       |
| AT1G64710 | 3.235300479 | 3.340258658 | 0.002482593 | 0.010279608 | GroES-like zinc-binding alcohol dehydrogenase family protein             |
| AT1G05000 | 3.065338061 | 2.715527247 | 0.012406643 | 0.028972926 | Phosphotyrosine protein phosphatases superfamily protein                 |
| AT1G67060 | 2.459044358 | 4.773176378 | 0.006932643 | 0.003062836 | peptidase M50B-like protein                                              |
| AT4G28350 | 5.9590245   | 7.421910897 | 3.48278E-05 | 0.01784048  | Concanavalin A-like lectin protein kinase family protein                 |
| AT5G27420 | 26.18040417 | 60.2225067  | 0.008004964 | 0.006010199 | carbon/nitrogen insensitive 1                                            |
| AT1G65390 | 13.51479217 | 29.8374807  | 0.018772293 | 0.002768522 | phloem protein 2 A5                                                      |
| AT4G18950 | 2.397335424 | 3.407944212 | 0.013121787 | 0.000178956 | Integrin-linked protein kinase family                                    |
| AT1G21120 | 41.8406258  | 67.58775033 | 0.014940176 | 0.017085305 | O-methyltransferase family protein                                       |
| AT5G24230 | 2.399442135 | 2.513333162 | 0.002003064 | 0.006639544 | Lipase class 3-related protein                                           |
| AT1G66500 | 2.979618033 | 5.716265037 | 0.006502991 | 0.000194016 | Pre-mRNA cleavage complex II                                             |
| AT1G53440 | 2.510946459 | 3.318443216 | 0.005393561 | 0.001672388 | Leucine-rich repeat transmembrane protein kinase                         |
| AT3G51450 | 3.865576429 | 3.284250458 | 0.03405755  | 0.026575803 | Calcium-dependent phosphotriesterase superfamily protein                 |
| AT1G76980 | 2.359344857 | 3.585640338 | 0.002556929 | 5.75084E-05 | patatin-like phospholipase domain protein                                |
| AT1G66910 | 2.241945481 | 2.325717287 | 0.000766741 | 0.000317546 | Protein kinase superfamily protein                                       |
| AT2G28830 | 4.945697098 | 7.023989451 | 0.00356823  | 0.000322084 | armadillo/beta-catenin repeat protein                                    |
| AT5G67350 | 2.26394721  | 2.598669424 | 0.017081062 | 0.022983979 | hypothetical protein                                                     |
| AT3G16530 | 15.14220185 | 19.52182134 | 0.015628025 | 0.00047349  | Legume lectin family protein                                             |
| AT3G01290 | 2.103300299 | 3.196793688 | 0.004365965 | 0.016847298 | SPFH/Band 7/PHB domain-containing membrane-associated protein family     |
| AT1G15190 | 3.887895577 | 4.743211231 | 0.038553059 | 0.047178148 | Fasciclin-like arabinogalactan family protein                            |
| AT3G05320 | 2.03378607  | 3.610210424 | 0.035260921 | 0.008705731 | O-fucosyltransferase family protein                                      |
| AT1G77500 | 2.535700103 | 3.805962414 | 0.016699897 | 0.000793457 | DUF630 family protein%2C putative (DUF630 and DUF632)                    |
| AT4G14370 | 12.9543272  | 29.14922048 | 0.018455456 | 0.006485322 | Disease resistance protein (TIR-NBS-LRR class) family                    |
| AT4G11360 | 2.068806942 | 2.230673743 | 0.004357556 | 0.009927464 | RING-H2 finger A1B                                                       |
| AT2G08740 | 11.76258953 | 21.20089697 | 0.004367618 | 0.005116927 | NA                                                                       |
| AT1G50740 | 4.967253629 | 10.60659014 | 0.022913337 | 0.010524163 | Transmembrane proteins 14C                                               |
| AT4G11521 | 5.834180765 | 9.666460961 | 0.016604856 | 0.020211576 | Receptor-like protein kinase-related family protein                      |
| AT2G22870 | 7.796559184 | 13.6280877  | 0.007297849 | 0.002043055 | P-loop containing nucleoside triphosphate hydrolases superfamily protein |
| AT1G72910 | 3.069737948 | 5.611539488 | 0.0155612   | 0.024426907 | Toll-Interleukin-Resistance (TIR) domain-containing protein              |
| AT1G42990 | 4.721720024 | 7.971657376 | 0.012532585 | 0.003969844 | basic region/leucine zipper motif 60                                     |
| AT2G23200 | 2.050720724 | 2.887834935 | 0.001586945 | 4.6342E-05  | Protein kinase superfamily protein                                       |
| AT3G52450 | 6.315239506 | 13.21681198 | 0.005703181 | 0.01255679  | plant U-box 22                                                           |
| AT1G02400 | 15.9672536  | 32.87982676 | 0.045295137 | 0.008421094 | gibberellin 2-oxidase 6                                                  |
| AT3G46090 | 4.642071651 | 10.6635936  | 0.027424895 | 0.000692907 | C2H2 and C2HC zinc fingers superfamily protein                           |
| AT1G70740 | 2.593550625 | 4.557102914 | 0.012277324 | 0.004258111 | Protein kinase superfamily protein                                       |
| AT2G39200 | 17.16573699 | 29.60670478 | 0.002571077 | 0.007359704 | Seven transmembrane MLO family protein                                   |
| AT1G34750 | 2.313384319 | 3.867433649 | 0.002205164 | 0.000163046 | Protein phosphatase 2C family protein                                    |
| AT3G18690 | 3.752515394 | 4.595589732 | 0.015038307 | 0.00546713  | MAP kinase substrate 1                                                   |

|           |             |             |             |             |                                                                           |
|-----------|-------------|-------------|-------------|-------------|---------------------------------------------------------------------------|
| AT5G54850 | 2.686084489 | 3.257397268 | 0.038877293 | 2.34639E-05 | hexon                                                                     |
| AT1G76070 | 4.942278273 | 7.681295137 | 0.022727392 | 0.001399847 | hypothetical protein                                                      |
| AT5G25920 | 5.788243493 | 7.658995405 | 0.031543488 | 0.030956654 | hypothetical protein                                                      |
| AT3G23010 | 3.180862289 | 10.19500059 | 0.048689348 | 2.7154E-05  | receptor like protein 36                                                  |
| AT2G32930 | 2.031422259 | 3.369156612 | 0.018935933 | 0.000165097 | zinc finger nuclease 2                                                    |
| AT2G33710 | 5.922469601 | 10.58854784 | 0.03406685  | 0.000894563 | Integrase-type DNA-binding superfamily protein                            |
| AT2G25297 | #jDIV/0!    | #jDIV/0!    | 0.039284851 | 0.005389355 | transmembrane protein                                                     |
| AT1G22280 | 2.871644736 | 4.915402841 | 0.015853592 | 0.000655606 | phytochrome-associated protein phosphatase type 2C                        |
| AT4G23550 | 5.152916212 | 9.20951164  | 0.005681626 | 0.005111348 | WRKY family transcription factor                                          |
| AT3G57450 | 4.160167507 | 7.572176779 | 0.046245245 | 0.024789666 | hypothetical protein                                                      |
| AT4G15975 | 29.25190975 | 42.41301325 | 0.03902706  | 0.003770558 | RING/U-box superfamily protein                                            |
| AT5G39580 | 4.283709912 | 7.134704497 | 0.015625328 | 0.006074519 | Peroxidase superfamily protein                                            |
| AT4G01950 | 3.44176984  | 9.760380901 | 0.001529995 | 0.022951143 | glycerol-3-phosphate acyltransferase 3                                    |
| AT1G17330 | 2.352277475 | 2.415529753 | 0.021225939 | 0.021117916 | Metal-dependent phosphohydrolase                                          |
| AT1G67470 | 4.126886054 | 6.309817453 | 0.019704933 | 0.000322557 | Protein kinase superfamily protein                                        |
| AT5G18470 | 3.180385532 | 5.95188188  | 0.002624274 | 0.022165828 | Curculin-like (mannose-binding) lectin family protein                     |
| AT1G59590 | 3.989242733 | 12.59529528 | 0.029353996 | 1.78808E-07 | ZCF37                                                                     |
| AT4G34150 | 4.238316106 | 9.400299994 | 0.009867269 | 0.004898655 | Calcium-dependent lipid-binding (CaLB domain) family protein              |
| AT1G76700 | 2.493267944 | 3.980982097 | 0.005432792 | 0.002943087 | DNAJ heat shock N-terminal domain-containing protein                      |
| AT1G20310 | 9.406801347 | 24.18965249 | 0.048820826 | 0.001196043 | syringolide-induced protein                                               |
| AT4G35180 | 90.70274629 | 184.2702351 | 0.02309293  | 0.002297646 | LYS/HIS transporter 7                                                     |
| AT1G30700 | 25.67311846 | 39.1934223  | 0.013640338 | 0.003625923 | FAD-binding Berberine family protein                                      |
| AT3G50190 | 4.2326758   | 4.987132699 | 0.000263807 | 0.021716114 | transmembrane protein%2C putative (DUF247)                                |
| AT4G28703 | 2.744882964 | 3.584185814 | 0.003967636 | 0.024164388 | RmlC-like cupins superfamily protein                                      |
| AT5G66790 | 8.088399399 | 11.43279422 | 0.010209056 | 0.000183275 | Protein kinase superfamily protein                                        |
| AT5G61010 | 3.981137184 | 4.014085373 | 0.00188899  | 0.000357017 | exocyst subunit exo70 family protein E2                                   |
| AT2G15480 | 3.385067429 | 6.460272214 | 0.003923461 | 0.00364719  | UDP-glucosyl transferase 73B5                                             |
| AT3G16860 | 3.636413392 | 8.246404448 | 0.02930159  | 0.013211132 | COBRA-like protein 8 precursor                                            |
| AT1G11300 | 2.34880544  | 2.603549821 | 0.007723171 | 0.015294335 | G-type lectin S-receptor-like Serine/Threonine-kinase                     |
| AT5G65600 | 30.47331316 | 32.65509203 | 0.009620898 | 0.02589897  | Concanavalin A-like lectin protein kinase family protein                  |
| AT3G09520 | 5.302504874 | 22.23585523 | 0.019532588 | 0.001549411 | exocyst subunit exo70 family protein H4                                   |
| AT3G45660 | 3.051830211 | 3.385050854 | 0.009777852 | 0.005448726 | Major facilitator superfamily protein                                     |
| AT5G47850 | 81.53013976 | 361.293431  | 0.008903359 | 0.001819234 | CRINKLY4 related 4                                                        |
| AT5G62570 | 2.585483537 | 3.896072903 | 0.01686196  | 1.26705E-06 | Calmodulin binding protein-like protein                                   |
| AT4G22980 | 2.453263187 | 3.115980234 | 0.000912668 | 0.013729969 | molybdenum cofactor sulfurase-like protein                                |
| AT1G30720 | 2.859835683 | 5.547284213 | 0.002244839 | 0.006858978 | FAD-binding Berberine family protein                                      |
| AT2G40270 | 2.117150772 | 4.144318044 | 0.007638551 | 0.01647947  | Protein kinase family protein                                             |
| AT5G38310 | 10.6914511  | 19.59090726 | 0.018414525 | 0.008535659 | hypothetical protein                                                      |
| AT3G16030 | 9.214846531 | 10.41352615 | 0.015366293 | 0.001434695 | lectin protein kinase family protein                                      |
| AT2G35980 | 7.015088727 | 14.23133342 | 0.000282821 | 0.001912234 | Late embryogenesis abundant (LEA) hydroxyproline-rich glycoprotein family |

|           |             |             |             |             |                                                                                                 |
|-----------|-------------|-------------|-------------|-------------|-------------------------------------------------------------------------------------------------|
| AT2G32190 | 2.417239906 | 7.8998025   | 0.021022495 | 0.00452273  | cysteine-rich/transmembrane domain A-like protein                                               |
| AT2G39650 | 6.487793834 | 16.12919188 | 0.021072973 | 0.000526611 | cruciferin (DUF506)                                                                             |
| AT4G34380 | 2.193098545 | 10.81703148 | 0.012722723 | 1.49498E-05 | Transducin/WD40 repeat-like superfamily protein                                                 |
| AT3G57540 | 2.179528203 | 3.383133259 | 0.003169771 | 0.008434179 | Remorin family protein                                                                          |
| AT5G12880 | 4.21744391  | 8.518625511 | 0.037494161 | 0.010658746 | proline-rich family protein                                                                     |
| AT3G28580 | 20.14823353 | 37.56346459 | 0.007211933 | 0.043493308 | P-loop containing nucleoside triphosphate hydrolases superfamily protein                        |
| AT1G68340 | 2.642308255 | 4.382213924 | 0.028487402 | 0.001357866 | hypothetical protein (DUF1639)                                                                  |
| AT5G45250 | 2.193790874 | 2.483276303 | 0.019459044 | 0.000494916 | Disease resistance protein (TIR-NBS-LRR class) family                                           |
| AT1G01480 | 4.383680303 | 8.341446541 | 0.04588785  | 0.010481221 | 1-amino-cyclopropane-1-carboxylate synthase 2                                                   |
| AT2G23680 | 6.765221618 | 14.78889464 | 0.012563042 | 0.001957387 | Cold acclimation protein WCOR413 family                                                         |
| AT5G55090 | 2.418665267 | 4.38765977  | 0.004244206 | 0.000879128 | mitogen-activated protein kinase kinase kinase 15                                               |
| AT4G38560 | 8.327787809 | 22.6395714  | 0.025478919 | 0.001878861 | phospholipase-like protein (PEARL1 4) family protein                                            |
| AT5G22545 | #jDIV/0!    | #jDIV/0!    | 0.025300069 | 0.001922228 | hypothetical protein                                                                            |
| AT4G02330 | 3.319673131 | 5.447088897 | 0.000210679 | 0.031363213 | Plant invertase/pectin methylesterase inhibitor superfamily                                     |
| AT2G38250 | 2.081891317 | 2.011027899 | 0.019926782 | 0.00234444  | Homeodomain-like superfamily protein                                                            |
| AT1G05675 | 79.66185906 | 115.7265407 | 0.016830127 | 0.00181942  | UDP-Glycosyltransferase superfamily protein                                                     |
| AT2G35000 | 3.558984651 | 7.966738963 | 0.014831318 | 0.00093536  | RING/U-box superfamily protein                                                                  |
| AT4G17900 | 2.728090902 | 3.948615129 | 0.01236824  | 0.001702888 | PLATZ transcription factor family protein                                                       |
| AT5G67340 | 7.746439149 | 14.23646333 | 0.009407633 | 0.018315721 | ARM repeat superfamily protein                                                                  |
| AT4G04490 | 2.517374202 | 2.412087016 | 0.006693802 | 0.011444    | cysteine-rich RLK (RECEPTOR-like protein kinase) 36                                             |
| AT1G03740 | 3.408854656 | 5.247380105 | 0.015860472 | 0.006617784 | Protein kinase superfamily protein                                                              |
| AT4G31550 | 6.439899164 | 11.8863456  | 0.01346093  | 0.002719392 | WRKY DNA-binding protein 11                                                                     |
| AT4G23180 | 9.632818294 | 17.92109967 | 0.007910885 | 0.011326607 | cysteine-rich RLK (RECEPTOR-like protein kinase) 10                                             |
| AT1G78860 | 3.765576245 | 6.671629422 | 0.014363824 | 0.004394771 | D-mannose binding lectin protein with Apple-like carbohydrate-binding domain-containing protein |
| AT3G08720 | 7.097712035 | 11.82170454 | 0.039030035 | 0.003191695 | serine/threonine protein kinase 2                                                               |
| AT5G48540 | 16.01692455 | 21.04572504 | 0.003702979 | 0.009389749 | receptor-like protein kinase-related family protein                                             |
| AT2G32250 | 2.115012302 | 2.146208441 | 0.017879247 | 0.02925122  | FAR1-related sequence 2                                                                         |
| AT5G07390 | 3.532915611 | 3.050544477 | 0.001064704 | 0.011174567 | respiratory burst oxidase homolog A                                                             |
| AT3G26680 | 2.976005124 | 4.004100872 | 0.002431119 | 0.000272975 | DNA repair metallo-beta-lactamase family protein                                                |
| AT1G21010 | 2.505689257 | 5.559410433 | 0.038911557 | 1.09621E-05 | poly polymerase                                                                                 |
| AT1G14540 | 175.0757166 | 885.2645272 | 0.048083738 | 0.00180206  | Peroxidase superfamily protein                                                                  |
| AT2G35710 | 7.298411817 | 22.02020266 | 0.024263952 | 0.003160027 | Nucleotide-diphospho-sugar transferases superfamily protein                                     |
| AT4G23240 | 2.278479756 | 2.325258194 | 0.021228613 | 0.049011988 | cysteine-rich RLK (RECEPTOR-like protein kinase) 16                                             |
| AT4G40080 | 4.239422152 | 6.715245679 | 0.021049683 | 0.004384683 | ENTH/ANTH/VHS superfamily protein                                                               |
| AT5G11970 | 2.724420396 | 3.292822452 | 0.036279396 | 0.004078255 | ABC family ABC transporter%2C putative (DUF3511)                                                |
| AT5G13190 | 2.847450782 | 5.491529409 | 0.034504334 | 0.002167752 | GSH-induced LITAF domain protein                                                                |
| AT4G39830 | 8.720648292 | 27.32742779 | 0.002058497 | 0.006329321 | Cupredoxin superfamily protein                                                                  |
| AT2G41880 | 3.347014738 | 3.225066004 | 0.04216264  | 0.001184997 | guanylate kinase 1                                                                              |
| AT5G17350 | 5.455796794 | 19.53698308 | 0.020233132 | 0.00046874  | hypothetical protein                                                                            |
| AT1G50745 | 11.98359098 | 54.87380412 | 0.018101728 | 0.029947374 | plant mobile domain protein                                                                     |

|           |             |             |             |             |                                                              |
|-----------|-------------|-------------|-------------|-------------|--------------------------------------------------------------|
| AT1G70581 | 7.12673071  | 7.52388782  | 0.004633924 | 0.028540209 | NA                                                           |
| AT1G06983 | 83.20784428 | 97.9395975  | 0.036562954 | 0.00223947  | NA                                                           |
| AT4G39580 | 16.32984536 | 35.31195208 | 0.013443459 | 0.0033277   | Galactose oxidase/kelch repeat superfamily protein           |
| AT4G05010 | 2.148055727 | 3.189509387 | 0.009401617 | 0.001147994 | F-box family protein                                         |
| AT1G05933 | 22.1789646  | 34.09490205 | 0.010221444 | 0.000336931 | NA                                                           |
| AT2G25410 | #jDIV/0!    | #jDIV/0!    | 0.00743258  | 0.012094147 | RING/U-box superfamily protein                               |
| AT5G11650 | 2.743292094 | 4.419514598 | 0.010649866 | 0.000869859 | alpha/beta-Hydrolases superfamily protein                    |
| AT3G22370 | 2.393625986 | 4.763566327 | 0.027408512 | 0.012287434 | alternative oxidase 1A                                       |
| AT4G11500 | 2.805521278 | 3.373044473 | 0.010896496 | 0.037684739 | NA                                                           |
| AT4G39670 | 8.319412749 | 35.54112128 | 0.029257712 | 0.002744035 | Glycolipid transfer protein (GLTP) family protein            |
| AT3G46110 | 5.037112032 | 6.94301516  | 0.018007396 | 0.000171638 | UPSTREAM OF FLC-like protein (DUF966)                        |
| AT3G53810 | 2.538998289 | 3.061940331 | 0.001741217 | 0.003824084 | Concanavalin A-like lectin protein kinase family protein     |
| AT5G46470 | 2.80115929  | 4.96483485  | 0.00252219  | 0.007659913 | disease resistance protein (TIR-NBS-LRR class) family        |
| AT1G13210 | 9.693922459 | 19.21253678 | 0.011295694 | 0.020031244 | autoinhibited Ca2+/ATPase II                                 |
| AT3G15210 | 2.604936904 | 3.77960712  | 0.009071542 | 0.002858694 | ethylene responsive element binding factor 4                 |
| AT3G02695 | 10.23674703 | 11.5653944  | 0.024375024 | 0.001671988 | NA                                                           |
| AT1G03230 | 2.862919763 | 3.44035492  | 0.025224185 | 0.004269381 | Eukaryotic aspartyl protease family protein                  |
| AT3G46620 | 2.403546576 | 7.097302679 | 0.035588056 | 0.004010946 | zinc finger (C3HC4-type RING finger) family protein          |
| AT3G19580 | 2.34246147  | 4.572858523 | 0.002468884 | 0.015329915 | zinc-finger protein 2                                        |
| AT1G72940 | 3.112494289 | 4.862626388 | 0.002388067 | 0.012272155 | Toll-Interleukin-Resistance (TIR) domain-containing protein  |
| AT2G17120 | 3.147602873 | 4.329190516 | 0.012061273 | 3.56909E-05 | lysm domain GPI-anchored protein 2 precursor                 |
| AT1G70170 | 7.298171863 | 10.35970937 | 0.009811181 | 0.005686977 | matrix metalloproteinase                                     |
| AT3G57760 | 2.569165564 | 3.551990065 | 0.02151815  | 3.09628E-05 | Protein kinase superfamily protein                           |
| AT2G23810 | 2.999596655 | 6.617117111 | 0.001838018 | 0.004097902 | tetraspanin8                                                 |
| AT3G50260 | 6.207029279 | 7.556074873 | 0.014369713 | 0.023386986 | cooperatively regulated by ethylene and jasmonate 1          |
| AT5G36920 | 3.694374372 | 2.095807988 | 0.007658773 | 0.031980125 | transmembrane protein                                        |
| AT5G11920 | 3.608956944 | 3.940808542 | 0.00468226  | 0.035230705 | 6-%261-fructan exohydrolase                                  |
| AT1G58410 | 2.64281886  | 3.578009085 | 0.00023528  | 0.016190647 | Disease resistance protein (CC-NBS-LRR class) family         |
| AT4G11300 | 3.859661116 | 10.12208974 | 0.014792933 | 0.001276099 | ROH1%2C putative (DUF793)                                    |
| AT5G01935 | 2.689444198 | 2.429392663 | 0.040321662 | 0.009017372 | NA                                                           |
| AT1G72960 | 3.597817527 | 5.112886714 | 0.039597776 | 0.012276876 | Root hair defective 3 GTP-binding protein (RHD3)             |
| AT2G32130 | 39.38029262 | 65.59767095 | 0.04572141  | 0.009091974 | intracellular protein transporter%2C putative (DUF641)       |
| AT3G29034 | 2.634518359 | 2.739867994 | 0.016027024 | 0.01094217  | transmembrane protein                                        |
| AT1G50750 | 18.01280837 | 52.05071582 | 0.021291388 | 0.014699884 | aminotransferase-like%2C mobile domain protein               |
| AT3G16510 | 2.252356794 | 5.154858611 | 0.008391935 | 0.000490127 | Calcium-dependent lipid-binding (CaLB domain) family protein |
| AT1G18200 | 2.072928154 | 2.624479439 | 0.026020581 | 0.003635821 | Rab GTPase-like A11 protein                                  |
| AT5G42380 | 17.72501329 | 72.16902161 | 0.011386613 | 0.01052398  | calmodulin like 37                                           |
| AT5G14700 | 10.81592798 | 27.42053903 | 0.02129398  | 0.025880202 | NAD(P)-binding Rossmann-fold superfamily protein             |
| AT5G02630 | 2.71326369  | 3.811846426 | 0.008104098 | 0.004411384 | Lung seven transmembrane receptor family protein             |
| AT4G37780 | 8.935518917 | 39.18716348 | 0.029601427 | 0.0191022   | myb domain protein 87                                        |

|           |             |             |             |             |                                                                                             |
|-----------|-------------|-------------|-------------|-------------|---------------------------------------------------------------------------------------------|
| AT3G55150 | 7.435708496 | 11.93542729 | 0.007156815 | 0.007652878 | exocyst subunit exo70 family protein H1                                                     |
| AT5G59730 | 3.790238325 | 7.800464932 | 0.016310021 | 0.010870134 | exocyst subunit exo70 family protein H7                                                     |
| AT2G02220 | 2.396976654 | 3.246002743 | 0.003014924 | 0.002854745 | phytosulfokin receptor 1                                                                    |
| AT5G46510 | 3.502301953 | 5.781063637 | 0.015167199 | 0.002787324 | Disease resistance protein (TIR-NBS-LRR class) family                                       |
| AT2G31990 | 4.01159088  | 5.391975568 | 0.02531395  | 0.008136351 | Exostosin family protein                                                                    |
| AT5G42830 | 7.273138726 | 11.27496228 | 0.012627645 | 0.005786832 | HXXXD-type acyl-transferase family protein                                                  |
| AT4G01090 | 2.474405181 | 5.197413268 | 0.011109185 | 0.002272501 | hypothetical protein (DUF3133)                                                              |
| AT5G42050 | 2.419459716 | 4.58935258  | 0.008175576 | 0.016255246 | DCD (Development and Cell Death) domain protein                                             |
| AT4G33300 | 2.192900193 | 3.118770381 | 0.001970911 | 0.007510526 | ADR1-like 1                                                                                 |
| AT2G23270 | #jDIV/0!    | #jDIV/0!    | 0.003751188 | 0.012798018 | transmembrane protein                                                                       |
| AT1G13340 | 5.001526249 | 14.58213792 | 0.017985975 | 0.001549024 | Regulator of Vps4 activity in the MVB pathway protein                                       |
| AT4G21410 | 2.058222349 | 2.638507405 | 0.021174546 | 0.002824354 | cysteine-rich RLK (RECEPTOR-like protein kinase) 29                                         |
| AT4G01740 | 2.481512908 | 2.727210555 | 0.003995537 | 0.000101469 | Cysteine/Histidine-rich C1 domain family protein                                            |
| AT5G65300 | 3.695086892 | 5.059418665 | 0.024718127 | 0.021475917 | hypothetical protein                                                                        |
| AT1G30620 | 3.208655904 | 5.129975285 | 0.013816819 | 0.000183443 | NAD(P)-binding Rossmann-fold superfamily protein                                            |
| AT3G13430 | 2.598954042 | 3.148073343 | 0.048989914 | 9.68575E-05 | RING/U-box superfamily protein                                                              |
| AT4G30210 | 4.974010869 | 8.904525123 | 0.022433077 | 0.007226079 | P450 reductase 2                                                                            |
| AT5G25170 | 2.569340834 | 3.000956389 | 0.027736246 | 0.032425924 | PPPDE putative thiol peptidase family protein                                               |
| AT5G38210 | 6.225531707 | 13.30703835 | 0.013576772 | 0.020590347 | Protein kinase family protein                                                               |
| AT5G62070 | 2.494864526 | 2.512306302 | 0.002607138 | 0.024657269 | IQ-domain 23                                                                                |
| AT5G66310 | 3.10091682  | 3.323504502 | 0.005768036 | 0.006335439 | ATP binding microtubule motor family protein                                                |
| AT2G36220 | 4.631686673 | 9.373125424 | 0.019344542 | 0.006971758 | hypothetical protein                                                                        |
| AT1G63245 | 13.96507095 | 6.809919168 | 0.026812128 | 0.012368552 | CLAVATA3/ESR-RELATED 14                                                                     |
| AT5G47960 | 5.655732701 | 8.905659691 | 4.62445E-05 | 0.005849072 | RAB GTPase homolog A4C                                                                      |
| AT5G52760 | 14.89576615 | 74.25002546 | 0.045733887 | 0.001520401 | Copper transport protein family                                                             |
| AT4G23210 | 2.814859607 | 8.542774631 | 0.004756118 | 6.00827E-05 | cysteine-rich RLK (RECEPTOR-like protein kinase) 13                                         |
| AT4G30350 | 2.012631376 | 3.142280689 | 0.001867589 | 0.004243223 | Double Clp-N motif-containing P-loop nucleoside triphosphate hydrolases superfamily protein |
| AT4G26120 | 4.274565208 | 4.84040961  | 0.000122399 | 0.000147228 | Ankyrin repeat family protein / BTB/POZ domain-containing protein                           |
| AT2G27389 | 30.18984793 | 59.11108952 | 0.012303537 | 0.025211888 | hypothetical protein                                                                        |
| AT4G11470 | 161.2882148 | 443.8509962 | 0.013159502 | 0.011723607 | cysteine-rich RLK (RECEPTOR-like protein kinase) 31                                         |
| AT5G25930 | 11.0282385  | 13.06601964 | 0.004935803 | 0.011936459 | kinase family with leucine-rich repeat domain-containing protein                            |
| AT1G16160 | 9.038114837 | 4.457226728 | 0.029351367 | 0.017464472 | wall associated kinase-like 5                                                               |
| AT5G46080 | 5.545583912 | 11.05160715 | 0.013585094 | 0.002065485 | Protein kinase superfamily protein                                                          |
| AT1G09353 | 16.65938934 | 24.06820018 | 0.025438136 | 0.007311416 | NA                                                                                          |
| AT1G69920 | 49.73533325 | 70.82498466 | 0.015815441 | 0.019834292 | glutathione S-transferase TAU 12                                                            |
| AT3G22930 | 2.27143727  | 3.384382338 | 0.014492815 | 0.01303145  | calmodulin-like 11                                                                          |
| AT5G08990 | 6.098526509 | 16.4627737  | 0.028025501 | 0.002186984 | NA                                                                                          |
| AT1G51915 | #jDIV/0!    | #jDIV/0!    | 0.005921667 | 0.01345085  | cryptdin protein-like protein                                                               |
| AT3G07190 | 2.233107228 | 2.496296896 | 0.005333864 | 0.019079838 | B-cell receptor-associated protein 31-like protein                                          |
| AT2G24160 | 5.788581089 | 11.66572175 | 0.002977793 | 0.002154698 | NA                                                                                          |



|           |             |             |             |             |                                                                                         |
|-----------|-------------|-------------|-------------|-------------|-----------------------------------------------------------------------------------------|
| AT3G28940 | 2.579055769 | 2.304562245 | 0.003431421 | 0.007390884 | AlG2-like (avirulence induced gene) family protein                                      |
| AT3G26210 | 2.4714621   | 2.563103834 | 0.016888883 | 0.004694016 | cytochrome P450%2C family 71%2C subfamily B%2C polypeptide 23                           |
| AT3G10930 | 7.269066833 | 15.19588807 | 0.022125606 | 0.006900432 | hypothetical protein                                                                    |
| AT5G50570 | 2.06103912  | 2.212031059 | 0.004641621 | 0.008608502 | Squamosa promoter-binding protein-like (SBP domain) transcription factor family protein |
| AT4G24570 | 10.07899742 | 37.2472017  | 0.009295309 | 0.000720843 | dicarboxylate carrier 2                                                                 |
| AT1G72520 | 32.64410927 | 90.65611578 | 0.016854393 | 0.021779646 | PLAT/LH2 domain-containing lipoxygenase family protein                                  |
| AT4G18880 | 4.188077356 | 6.54352591  | 0.005131396 | 4.5633E-05  | heat shock transcription factor A4A                                                     |
| AT3G28450 | 2.192705007 | 3.728387209 | 0.000683526 | 0.009548223 | Leucine-rich repeat protein kinase family protein                                       |
| AT2G07715 | 2.981147048 | 4.16574563  | 0.039879507 | 0.033375723 | Nucleic acid-binding%2C OB-fold-like protein                                            |
| AT4G15233 | 5.345616461 | 6.444611227 | 0.042264266 | 0.026029355 | ABC-2 and Plant PDR ABC-type transporter family protein                                 |
| AT5G40170 | 4.231465116 | 5.50616296  | 0.00075784  | 0.003156876 | receptor like protein 54                                                                |
| AT5G40460 | 2.877340725 | 3.583079169 | 0.017796941 | 0.020799036 | cyclin-dependent kinase inhibitor SMR3-like protein                                     |
| AT2G04040 | 2.323691257 | 3.594006117 | 0.001355539 | 0.012691475 | MATE efflux family protein                                                              |
| AT1G70520 | 2.473292145 | 2.877658557 | 0.007245235 | 0.008702438 | cysteine-rich RLK (RECEPTOR-like protein kinase) 2                                      |
| AT5G18360 | 2.302719808 | 3.053258247 | 0.010929258 | 0.005176748 | Disease resistance protein (TIR-NBS-LRR class) family                                   |
| AT3G17700 | 7.040543999 | 19.50299913 | 0.016360728 | 0.008308782 | cyclic nucleotide-binding transporter 1                                                 |
| AT5G64310 | 4.555753595 | 11.28134722 | 0.013253048 | 0.000510319 | arabinogalactan protein 1                                                               |
| AT4G11850 | 4.55449572  | 8.623151117 | 0.012749352 | 0.009514755 | phospholipase D gamma 1                                                                 |
| AT2G23770 | 5.054028678 | 6.525094031 | 0.017463997 | 5.87016E-06 | protein kinase family protein / peptidoglycan-binding LysM domain-containing protein    |
| AT2G27660 | 11.41905643 | 36.62416794 | 0.009476167 | 0.019168923 | Cysteine/Histidine-rich C1 domain family protein                                        |
| AT5G06775 | 4.582897001 | 19.12501446 | 0.030739758 | 2.09146E-05 | NA                                                                                      |
| AT3G57630 | 2.30754649  | 3.381499918 | 0.027059504 | 0.00224106  | exostosin family protein                                                                |
| AT4G18205 | 13.80777652 | 16.7094313  | 0.003009543 | 0.022437662 | Nucleotide-sugar transporter family protein                                             |
| AT1G16670 | 3.474210164 | 5.258409667 | 0.014083531 | 0.004155738 | Protein kinase superfamily protein                                                      |
| AT1G65481 | 10.40995288 | 18.9891217  | 0.004529316 | 0.000196099 | transmembrane protein                                                                   |
| AT1G55152 | #jDIV/0!    | #jDIV/0!    | 0.002070183 | 0.020946998 | hypothetical protein                                                                    |
| AT1G66160 | 3.36960057  | 4.966017667 | 0.005820002 | 0.00499184  | CYS%2C MET%2C PRO%2C and GLY protein 1                                                  |
| AT5G42010 | 4.029778519 | 11.71364688 | 0.002413383 | 0.010136922 | Transducin/WD40 repeat-like superfamily protein                                         |
| AT5G24110 | 182.6993103 | 431.9760118 | 0.042088281 | 0.004562613 | WRKY DNA-binding protein 30                                                             |
| AT4G18195 | 49.44499999 | 57.26162573 | 0.015896318 | 0.004240705 | purine permease 8                                                                       |
| AT3G13090 | 3.995347197 | 4.041659534 | 0.018800248 | 0.015917811 | multidrug resistance-associated protein 8                                               |
| AT5G11000 | 2.137004241 | 3.813620831 | 0.002589846 | 0.002176018 | hypothetical protein (DUF868)                                                           |
| AT5G35580 | 4.2596882   | 4.419378748 | 0.000196584 | 0.038622229 | Protein kinase superfamily protein                                                      |
| AT1G74430 | 2.296320637 | 2.739474884 | 0.000555924 | 0.016272523 | myb domain protein 95                                                                   |
| AT1G18300 | 2.739356849 | 8.491259125 | 0.037808535 | 0.00797795  | nudix hydrolase homolog 4                                                               |
| AT3G45640 | 5.441812013 | 12.07281856 | 0.009639396 | 0.004494765 | mitogen-activated protein kinase 3                                                      |
| AT1G29690 | 4.331179574 | 7.198255995 | 0.008357119 | 0.003986424 | MAC/Perforin domain-containing protein                                                  |
| AT1G33610 | 4.468599978 | 6.829001547 | 0.02031962  | 0.005515593 | Leucine-rich repeat (LRR) family protein                                                |
| AT3G09870 | 2.530515347 | 8.241586308 | 0.026130202 | 0.022628176 | SAUR-like auxin-responsive protein family                                               |
| AT4G39890 | 6.956427313 | 14.49225801 | 0.019025171 | 0.000954118 | RAB GTPase homolog H1C                                                                  |

|           |             |             |             |             |                                                                              |
|-----------|-------------|-------------|-------------|-------------|------------------------------------------------------------------------------|
| AT4G01010 | 5.10073886  | 10.20112745 | 0.041236836 | 0.002089424 | cyclic nucleotide-gated channel 13                                           |
| AT5G39020 | 10.04003609 | 14.32029153 | 0.01337239  | 0.002868657 | Malectin/receptor-like protein kinase family protein                         |
| AT4G25900 | 2.886519649 | 3.275665579 | 0.00113568  | 0.01875866  | Galactose mutarotase-like superfamily protein                                |
| AT5G38990 | 2.883576211 | 3.839954931 | 0.019955043 | 0.001954096 | Malectin/receptor-like protein kinase family protein                         |
| AT1G20823 | 4.559000443 | 8.612482198 | 0.006845159 | 0.003454414 | RING/U-box superfamily protein                                               |
| AT4G20860 | 2.826225335 | 3.552443694 | 0.006690582 | 0.00718856  | FAD-binding Berberine family protein                                         |
| AT5G66210 | 5.509004483 | 13.56322593 | 0.006053963 | 0.004174906 | calcium-dependent protein kinase 28                                          |
| AT1G11310 | 3.963525858 | 8.039910222 | 0.012224071 | 0.013398115 | Seven transmembrane MLO family protein                                       |
| AT1G78830 | 2.336633173 | 3.048394394 | 0.022632317 | 0.047835283 | Curculin-like (mannose-binding) lectin family protein                        |
| AT3G44720 | 2.31788046  | 3.977755823 | 0.018478926 | 0.013740595 | arogenate dehydratase 4                                                      |
| AT1G73810 | 5.801159437 | 12.79566865 | 0.033214999 | 0.009996228 | Core-2/I-branching beta-1%2C6-N-acetylglucosaminyltransferase family protein |
| AT1G21320 | 2.220864978 | 3.421994186 | 0.009987234 | 0.001029592 | nucleic acid/nucleotide binding protein                                      |
| AT5G09800 | 10.14943289 | 17.85757904 | 0.031702135 | 0.004045136 | ARM repeat superfamily protein                                               |
| AT4G20780 | 12.32294333 | 21.67845498 | 0.021394792 | 0.004678547 | calmodulin like 42                                                           |
| AT3G47570 | 3.647532056 | 4.522023406 | 0.001170984 | 0.00069432  | Leucine-rich repeat protein kinase family protein                            |
| AT5G18400 | 2.221662624 | 4.344134027 | 0.016983455 | 0.000541113 | Cytokine-induced anti-apoptosis inhibitor 1%2C Fe-S biogenesis               |
| AT4G35480 | 5.560061985 | 13.77605939 | 0.023030389 | 0.000229877 | RING-H2 finger A3B                                                           |
| AT4G31800 | 5.190925672 | 6.264160799 | 0.007249123 | 0.015163618 | WRKY DNA-binding protein 18                                                  |
| AT4G00970 | 4.742700686 | 10.85698118 | 0.000287843 | 0.028109418 | cysteine-rich RLK (RECEPTOR-like protein kinase) 41                          |
| AT3G08870 | 3.591849462 | 5.121975353 | 0.001419118 | 0.000492939 | Concanavalin A-like lectin protein kinase family protein                     |
| AT1G68690 | 5.256549251 | 9.656971781 | 0.006021838 | 0.001511583 | Protein kinase superfamily protein                                           |
| AT4G18253 | 8.706487128 | 16.27677117 | 0.046548645 | 0.002602098 | receptor Serine/Threonine kinase-like protein                                |
| AT1G10340 | 2.821720263 | 11.76848986 | 0.04490344  | 0.000630592 | Ankyrin repeat family protein                                                |
| AT2G20562 | 9.741353806 | 27.42226608 | 0.03397675  | 0.000825311 | taximin                                                                      |
| AT5G05190 | 3.860775252 | 9.218466247 | 0.011360579 | 0.000438813 | hypothetical protein (DUF3133)                                               |
| AT3G21150 | 7.520746192 | 22.7031113  | 0.006209183 | 0.008320584 | B-box 32                                                                     |
| AT3G54150 | 39.08531493 | 69.31667874 | 0.021412387 | 0.01090357  | S-adenosyl-L-methionine-dependent methyltransferases superfamily protein     |
| AT1G23830 | 3.925773085 | 4.618563052 | 0.000943966 | 0.017983772 | transmembrane protein                                                        |
| AT5G04870 | 2.500784254 | 3.727706524 | 0.004184001 | 0.000973716 | calcium dependent protein kinase 1                                           |
| AT4G22710 | 7.6672226   | 14.02818732 | 0.020668014 | 0.016786556 | cytochrome P450%2C family 706%2C subfamily A%2C polypeptide 2                |
| AT5G44820 | 3.851325042 | 4.45839766  | 0.021673385 | 0.041106969 | Nucleotide-diphospho-sugar transferase family protein                        |
| AT5G03380 | 3.768460459 | 5.043080663 | 0.0108368   | 0.002975627 | Heavy metal transport/detoxification superfamily protein                     |
| AT1G72950 | 2.636191144 | 9.641714457 | 0.025151734 | 0.003219368 | Disease resistance protein (TIR-NBS class)                                   |
| AT5G28610 | 25.29135935 | 43.61129664 | 0.015482506 | 0.008232785 | LOW protein: ATP-dependent RNA helicase DRS1-like protein                    |
| AT5G06860 | 2.055741202 | 2.073966068 | 0.035957728 | 0.037486492 | polygalacturonase inhibiting protein 1                                       |
| AT3G55980 | 8.796559155 | 19.56089355 | 0.007806593 | 0.004771019 | salt-inducible zinc finger 1                                                 |
| AT5G25050 | 2.188635681 | 5.230546967 | 0.024647204 | 0.002307961 | Major facilitator superfamily protein                                        |
| AT1G09970 | 2.316598217 | 2.445895664 | 0.010771267 | 0.000829152 | Leucine-rich receptor-like protein kinase family protein                     |
| AT4G24160 | 3.127986819 | 6.125488188 | 0.024656932 | 0.00058865  | alpha/beta-Hydrolases superfamily protein                                    |
| AT1G05575 | 14.35433952 | 39.45648093 | 0.010203099 | 0.028735534 | transmembrane protein                                                        |

|           |             |             |             |             |                                                       |
|-----------|-------------|-------------|-------------|-------------|-------------------------------------------------------|
| AT1G61380 | 2.028832744 | 2.618939013 | 0.031197584 | 0.003884027 | S-domain-1 29                                         |
| AT3G08760 | 4.069712098 | 4.113326836 | 0.001865788 | 0.008279079 | Protein kinase superfamily protein                    |
| AT3G09032 | 2.831487457 | 4.149601807 | 0.041726324 | 0.001082616 | josephin-like protein                                 |
| AT4G24310 | 9.122098712 | 18.03069925 | 9.08806E-06 | 0.040372364 | transmembrane protein%2C putative (DUF679)            |
| AT3G07195 | 29.91136293 | 89.21215527 | 0.033695176 | 0.000676145 | RPM1-interacting protein 4 (RIN4) family protein      |
| AT1G23710 | 4.192806823 | 10.03414921 | 0.035983944 | 0.003243205 | hypothetical protein (DUF1645)                        |
| AT5G41750 | 27.80597858 | 61.12003249 | 0.023759385 | 0.001647941 | Disease resistance protein (TIR-NBS-LRR class) family |
| AT5G64750 | 2.692885329 | 3.942244613 | 0.031790353 | 0.014892512 | Integrase-type DNA-binding superfamily protein        |
| AT2G42350 | 3.882263687 | 4.843624319 | 0.00216413  | 0.001978711 | RING/U-box superfamily protein                        |
| AT4G04695 | 2.092442309 | 3.878937847 | 0.00512825  | 0.002835061 | calcium-dependent protein kinase 31                   |
| AT4G27980 | 4.780983126 | 5.095405387 | 0.00797374  | 0.00058097  | trichohyalin-like protein (DUF3444)                   |
| AT2G28815 | 11.31008871 | 14.07926008 | 0.020974821 | 0.007659526 | 50S ribosomal protein L16                             |
| AT4G26200 | 10.07284294 | 22.87174506 | 0.002545278 | 0.002541982 | 1-amino-cyclopropane-1-carboxylate synthase 7         |
| AT4G01700 | 4.404931687 | 15.45166761 | 0.030158007 | 0.007361921 | Chitinase family protein                              |
| AT3G13432 | 20.49923729 | 21.63740975 | 0.008468777 | 0.023401419 | transmembrane protein                                 |
| AT2G19130 | 4.510115335 | 11.24820359 | 0.010968625 | 0.013594768 | S-locus lectin protein kinase family protein          |
| AT1G51920 | 22.93315036 | 20.41984969 | 0.0334254   | 0.001649421 | transmembrane protein                                 |
| AT4G18170 | 3.772372767 | 7.235082032 | 0.006054516 | 0.017655747 | WRKY DNA-binding protein 28                           |
| AT4G22305 | 2.389298076 | 2.581435957 | 0.003409057 | 0.01857025  | alpha/beta-Hydrolases superfamily protein             |
| AT1G61800 | 4.187836642 | 5.056934869 | 0.000562563 | 0.04549033  | glucose-6-phosphate/phosphate translocator 2          |
| AT1G51913 | #jDIV/0!    | #jDIV/0!    | 0.008417455 | 0.004167189 | transmembrane protein                                 |
| AT3G47820 | 3.738690478 | 6.129778199 | 0.000558829 | 0.000775947 | PLANT U-BOX 39                                        |
| AT2G23320 | 4.187975996 | 4.869028731 | 0.01286227  | 0.002166848 | WRKY DNA-binding protein 15                           |
| AT4G02380 | 2.565372448 | 3.076125686 | 0.010725316 | 0.000486246 | senescence-associated gene 21                         |
| AT1G59865 | 3.65304352  | 7.109707979 | 0.028545082 | 0.014364605 | transmembrane protein                                 |
| AT1G57990 | 5.885937006 | 15.45447188 | 0.017706996 | 0.033494652 | purine permease 18                                    |
| AT3G50760 | 3.668654434 | 7.745313584 | 0.026164171 | 0.006901001 | galacturonosyltransferase-like 2                      |
| AT5G66650 | 3.038450449 | 7.654661982 | 0.043331775 | 0.011055767 | calcium uniporter (DUF607)                            |
| AT3G46080 | 3.441808263 | 7.435564835 | 0.000987466 | 0.004076752 | C2H2-type zinc finger family protein                  |
| AT5G40780 | 2.374280309 | 2.150175894 | 0.035821172 | 0.042992492 | lysine histidine transporter 1                        |
| AT4G12120 | 3.599010558 | 7.971925666 | 0.025726986 | 0.002145903 | Sec1/munc18-like (SM) proteins superfamily            |
| AT1G71400 | 6.666655083 | 9.464287377 | 1.11496E-05 | 5.78256E-05 | receptor like protein 12                              |
| AT1G32920 | 5.133489063 | 8.628661726 | 0.019134363 | 0.007403554 | hypothetical protein                                  |
| AT1G36622 | 18.46461555 | 35.40090392 | 0.049479983 | 0.000790311 | transmembrane protein                                 |
| AT3G16720 | 4.800800276 | 12.05474822 | 0.011819462 | 0.002463365 | TOXICOS EN LEVADURA 2                                 |
| AT2G37940 | 8.255790422 | 13.9776847  | 0.011714787 | 0.007961298 | Inositol phosphorylceramide synthase 2                |
| AT1G58420 | 12.28130405 | 53.50349126 | 0.036654414 | 0.005232621 | Uncharacterized conserved protein UCP031279           |
| AT2G41010 | 2.691856858 | 4.178045856 | 0.006509422 | 0.001986311 | calmodulin (CAM)-binding protein of 25 kDa            |
| AT1G03730 | 2.490291106 | 4.060220819 | 0.012546369 | 0.001037466 | pyrroline-5-carboxylate reductase                     |
| AT2G15220 | 9.96275368  | 16.344963   | 0.005707762 | 0.046444994 | Plant basic secretory protein (BSP) family protein    |

|           |             |             |             |             |                                                                          |
|-----------|-------------|-------------|-------------|-------------|--------------------------------------------------------------------------|
| AT3G44260 | 4.465947588 | 9.298396827 | 0.0116387   | 0.003418008 | Polynucleotidyl transferase%2C ribonuclease H-like superfamily protein   |
| AT1G69900 | 4.917913414 | 14.15501436 | 0.015486539 | 0.006687259 | Actin cross-linking protein                                              |
| AT5G52830 | 3.63531673  | 4.448823853 | 0.003358105 | 0.008013841 | WRKY DNA-binding protein 27                                              |
| AT2G16870 | 2.571840609 | 4.102913027 | 0.036273134 | 0.000924908 | Disease resistance protein (TIR-NBS-LRR class) family                    |
| AT3G29400 | 2.319989784 | 3.040116811 | 0.014741104 | 0.014935306 | exocyst subunit exo70 family protein E1                                  |
| AT1G77890 | 2.376113719 | 3.470596743 | 0.036951057 | 4.57314E-05 | DNA-directed RNA polymerase II protein                                   |
| AT3G23230 | 43.6731302  | 46.18653971 | 0.033353543 | 0.000865195 | Integrase-type DNA-binding superfamily protein                           |
| AT1G15890 | 3.977666891 | 4.820950965 | 0.005307415 | 7.52979E-05 | Disease resistance protein (CC-NBS-LRR class) family                     |
| AT3G15760 | 2.189736852 | 2.367009661 | 0.042416321 | 0.010790609 | cytochrome P450 family protein                                           |
| AT4G23030 | 4.095574688 | 9.873436096 | 0.041618572 | 0.001581864 | MATE efflux family protein                                               |
| AT2G18680 | 9.208384195 | 41.53068719 | 5.73819E-05 | 0.000213844 | transmembrane protein                                                    |
| AT4G11890 | 27.37013194 | 51.16766059 | 0.033152528 | 0.009485622 | Protein kinase superfamily protein                                       |
| AT1G51860 | 2.74795455  | 3.083321554 | 0.006449741 | 0.00484741  | Leucine-rich repeat protein kinase family protein                        |
| AT3G60415 | 2.503730804 | 4.079405682 | 0.025074269 | 0.030008684 | phosphoglycerate mutase family protein                                   |
| AT1G69520 | 2.181753389 | 2.551824651 | 0.016498411 | 0.007547853 | S-adenosyl-L-methionine-dependent methyltransferases superfamily protein |
| AT1G27020 | 3.495528035 | 2.267440726 | 0.015156714 | 0.021143537 | plant/protein                                                            |
| AT1G64610 | 3.975430084 | 6.382726856 | 0.000109411 | 0.005110452 | Transducin/WD40 repeat-like superfamily protein                          |
| AT3G04220 | 12.245805   | 15.75764712 | 0.031516178 | 0.009025668 | Disease resistance protein (TIR-NBS-LRR class) family                    |
| AT4G22030 | #jDIV/0!    | #jDIV/0!    | 0.037796194 | 7.41185E-05 | F-box protein with a domain protein                                      |
| AT3G59880 | 2.772817426 | 3.23178539  | 0.011477092 | 0.00679175  | hypothetical protein                                                     |
| AT2G39400 | 2.215204545 | 3.31677533  | 0.015893768 | 0.008429122 | alpha/beta-Hydrolases superfamily protein                                |
| AT5G22250 | 6.968975017 | 15.57158941 | 0.000386363 | 0.012639028 | Polynucleotidyl transferase%2C ribonuclease H-like superfamily protein   |
| AT5G06320 | 3.318378879 | 7.481452571 | 0.011624274 | 0.005296439 | NDR1/HIN1-like 3                                                         |
| AT2G41640 | 2.382109212 | 4.522504686 | 0.005368502 | 0.015349333 | Glycosyltransferase family 61 protein                                    |
| AT2G24570 | 3.438554615 | 5.493609416 | 0.002893305 | 1.21504E-05 | WRKY DNA-binding protein 17                                              |
| AT4G37030 | 2.581325032 | 3.489833448 | 0.021627308 | 0.002378671 | membrane protein                                                         |
| AT3G28850 | 5.420279418 | 8.381506834 | 0.004049115 | 0.000302256 | Glutaredoxin family protein                                              |
| AT4G23250 | 3.006362151 | 3.306691193 | 0.041454446 | 0.037571034 | cysteine-rich receptor-like protein kinase 17                            |
| AT1G30740 | 4.608574674 | 12.62990844 | 0.00657979  | 0.006329677 | FAD-binding Berberine family protein                                     |
| AT1G74360 | 12.90195294 | 16.444548   | 0.002435889 | 0.020697484 | Leucine-rich repeat protein kinase family protein                        |
| AT3G02840 | 30.1095949  | 157.2109903 | 0.03284039  | 0.009449225 | ARM repeat superfamily protein                                           |
| AT5G61600 | 2.065622624 | 4.94010173  | 0.000518373 | 0.002062871 | ethylene response factor 104                                             |
| AT3G11840 | 16.08405889 | 24.57552895 | 0.022633622 | 0.007569519 | E3 ubiquitin-protein ligase PUB24-like protein                           |
| AT5G62020 | 2.183419668 | 3.29350861  | 0.039270866 | 0.001139984 | heat shock transcription factor B2A                                      |
| AT4G11070 | #jDIV/0!    | #jDIV/0!    | 0.045590824 | 0.023163678 | WRKY family transcription factor                                         |
| AT3G61390 | #jDIV/0!    | #jDIV/0!    | 0.047979829 | 0.018770683 | RING/U-box superfamily protein                                           |
| AT4G23170 | 13.20412121 | 18.10511491 | 0.001405919 | 0.005635868 | receptor-like protein kinase-related family protein                      |
| AT4G38550 | 9.734461841 | 13.03315198 | 0.001736116 | 0.003138286 | phospholipase-like protein (PEARL1 4) family protein                     |
| AT3G49350 | 2.533578789 | 3.805656891 | 6.27952E-05 | 0.000681103 | Ypt/Rab-GAP domain of gyp1p superfamily protein                          |
| AT3G26980 | 4.026676733 | 6.62356432  | 0.036356814 | 1.65673E-06 | membrane-anchored ubiquitin-fold protein 4 precursor                     |

|           |             |             |             |             |                                                                 |
|-----------|-------------|-------------|-------------|-------------|-----------------------------------------------------------------|
| AT5G66675 | 4.424991174 | 7.938128817 | 0.001818015 | 0.012435271 | transmembrane protein%2C putative (DUF677)                      |
| AT3G14225 | #jDIV/0!    | #jDIV/0!    | 0.003059848 | 0.036266996 | GDSL-motif lipase 4                                             |
| AT1G13520 | 49.15416545 | 65.81429792 | 0.001921697 | 0.038857425 | hypothetical protein (DUF1262)                                  |
| AT5G64660 | 4.707092071 | 9.532340897 | 0.006340683 | 9.95794E-05 | CYS%2C MET%2C PRO%2C and GLY protein 2                          |
| AT3G15518 | 32.39914891 | 60.40236952 | 0.012316616 | 0.013574831 | hypothetical protein                                            |
| AT4G23280 | 89.4291859  | 132.2258821 | 0.005650307 | 0.02159637  | cysteine-rich RLK (RECEPTOR-like protein kinase) 20             |
| AT3G26500 | 8.157975222 | 12.42580985 | 0.007104287 | 0.006408869 | plant intracellular ras group-related LRR 2                     |
| AT3G46680 | 12.50098151 | 10.31741378 | 0.009257044 | 0.031814904 | UDP-Glycosyltransferase superfamily protein                     |
| AT5G41180 | 2.783972057 | 3.298541387 | 0.014270848 | 0.00549312  | leucine-rich repeat transmembrane protein kinase family protein |
| AT5G47070 | 1.877923861 | 2.997171835 | 0.018035964 | 0.00248726  | Protein kinase superfamily protein                              |
| AT5G37450 | 3.270855819 | 6.953094082 | 0.067533377 | 0.008834413 | Leucine-rich repeat protein kinase family protein               |
| AT5G45630 | 0.911867668 | 2.257868091 | 0.831225128 | 0.02304007  | senescence regulator (Protein of unknown function%2C DUF584)    |
| AT2G04480 | #jDIV/0!    | #jDIV/0!    | 0.250736752 | 0.042431843 | hypothetical protein                                            |
| AT3G14050 | 1.562093711 | 2.638306472 | 0.065834506 | 0.001238961 | RELA/SPOT homolog 2                                             |
| AT2G13665 | 1.704151433 | 2.273543595 | 0.051636198 | 0.044325711 | NA                                                              |
| AT1G21390 | 1.39434635  | 2.480438514 | 0.091691918 | 0.020924555 | embryo defective 2170                                           |
| AT3G17400 | #jDIV/0!    | #jDIV/0!    | NA          | 0.034081277 | F-box family protein                                            |
| AT3G43250 | 6.252538382 | 21.95856302 | 0.122890602 | 0.006313835 | coiled-coil protein (DUF572)                                    |
| AT3G18370 | 1.797840228 | 2.497658455 | 0.000637983 | 6.62065E-05 | C2 domain-containing protein                                    |
| AT4G15140 | 1.284360744 | 2.068406354 | 0.346803753 | 0.026687581 | hypothetical protein                                            |
| AT5G27060 | 1.47171455  | 2.112465801 | 0.117490256 | 0.020519401 | receptor like protein 53                                        |
| AT4G04540 | 4.005890547 | 14.74087069 | 0.112663444 | 0.001255617 | cysteine-rich RLK (RECEPTOR-like protein kinase) 39             |
| AT5G56580 | 1.468709677 | 2.831334633 | 0.065949392 | 0.000597205 | MAP kinase kinase 6                                             |
| AT4G11660 | 1.94286212  | 2.100274532 | 0.016024948 | 0.009537555 | winged-helix DNA-binding transcription factor family protein    |
| AT1G64385 | 1.806680497 | 2.295173964 | 0.016704067 | 0.000961706 | transmembrane protein                                           |
| AT1G32049 | #jDIV/0!    | #jDIV/0!    | 0.422649731 | 0.002671134 | NA                                                              |
| AT5G05490 | #jDIV/0!    | #jDIV/0!    | 0.422649731 | 0.044569681 | Rad21/Rec8-like family protein                                  |
| AT1G56250 | 47.12962297 | 104.2090953 | 0.071258413 | 0.004946203 | phloem protein 2-B14                                            |
| AT1G76965 | #jDIV/0!    | #jDIV/0!    | 0.192419264 | 0.02910554  | hypothetical protein                                            |
| AT1G73540 | 1.624512078 | 4.863634544 | 0.034073764 | 0.000453533 | nudix hydrolase homolog 21                                      |
| AT1G06753 | 0.883569924 | 2.581750475 | 0.794960323 | 0.007107305 | NA                                                              |
| AT3G56790 | 22.73272486 | 26.7224445  | 0.069897411 | 0.028747983 | RNA splicing factor-like protein                                |
| AT5G02400 | 1.132640206 | 2.170858886 | 0.513011612 | 0.025093546 | pol-like 2                                                      |
| AT5G57560 | 1.445838257 | 3.539074424 | 0.037665439 | 0.005903609 | Xyloglucan endotransglucosylase/hydrolase family protein        |
| AT1G45207 | 1.385672461 | 2.036201027 | 0.004115645 | 0.002464683 | Remorin family protein                                          |
| AT5G01730 | 1.464732098 | 2.12778929  | 0.036835874 | 0.001288211 | SCAR family protein 4                                           |
| AT3G13050 | 1.738195385 | 3.211691629 | 0.000875269 | 0.001042964 | Major facilitator superfamily protein                           |
| AT2G31955 | 1.912060301 | 2.003193057 | 0.001220064 | 0.000663702 | cofactor of nitrate reductase and xanthine dehydrogenase 2      |
| AT5G37540 | 1.476241189 | 2.102572664 | 0.003312486 | 0.005566219 | Eukaryotic aspartyl protease family protein                     |
| AT5G36970 | 16.25831216 | 18.02093744 | 0.230769862 | 0.034621501 | NDR1/HIN1-like 25                                               |

|           |             |             |             |             |                                                                                 |
|-----------|-------------|-------------|-------------|-------------|---------------------------------------------------------------------------------|
| AT1G67856 | 1.926004681 | 3.472473514 | 0.058464674 | 0.001138452 | RING/U-box superfamily protein                                                  |
| AT2G20900 | 1.104805388 | 2.427545312 | 0.398023888 | 0.001668238 | diacylglycerol kinase 5                                                         |
| AT5G63390 | 3.954348712 | 7.373311879 | 0.07824714  | 0.023758447 | O-fucosyltransferase family protein                                             |
| AT1G31355 | 2.212877111 | 2.804670558 | 0.093746228 | 0.007247216 | NA                                                                              |
| AT4G25470 | 1.569501176 | 2.055041238 | 0.339612931 | 0.022121281 | C-repeat/DRE binding factor 2                                                   |
| AT1G19310 | 1.896374287 | 2.132596798 | 0.064678382 | 0.016157877 | RING/U-box superfamily protein                                                  |
| AT1G67310 | 1.658484442 | 2.041504101 | 0.010940337 | 0.001520235 | Calmodulin-binding transcription activator protein with CG-1 and Ankyrin domain |
| AT3G55050 | 1.857296201 | 2.442939276 | 0.017377216 | 0.000202454 | Protein phosphatase 2C family protein                                           |
| AT2G29100 | #jDIV/0!    | #jDIV/0!    | 0.168758318 | 0.021130061 | glutamate receptor 2.9                                                          |
| AT1G64380 | 1.705725738 | 2.018218914 | 0.03374753  | 0.00179392  | Integrase-type DNA-binding superfamily protein                                  |
| AT1G07220 | 1.575568077 | 2.369713696 | 0.011798643 | 0.023835179 | O-glucosyltransferase rumi-like protein (DUF821)                                |
| AT4G36110 | 1.74062192  | 2.560959184 | 0.106972014 | 0.027903245 | SAUR-like auxin-responsive protein family                                       |
| AT2G02620 | 1.484959934 | 3.028925465 | 0.478222244 | 0.014153996 | Cysteine/Histidine-rich C1 domain family protein                                |
| AT3G15340 | 2.422660597 | 2.568376635 | 0.064343473 | 0.018382784 | proton pump interactor 2                                                        |
| AT2G37110 | 1.498617798 | 2.185161575 | 0.004474471 | 0.001644341 | PLAC8 family protein                                                            |
| AT2G31920 | #jDIV/0!    | #jDIV/0!    | 0.422649731 | 0.035695739 | elongation factor 1-delta%2C putative (DUF936)                                  |
| AT5G54490 | 3.10505348  | 10.00638985 | 0.07928608  | 0.031524044 | pinoid-binding protein 1                                                        |
| AT1G28390 | 1.875225106 | 2.516478671 | 0.0024688   | 0.028058322 | Protein kinase superfamily protein                                              |
| AT4G13820 | 1.284551634 | 4.770473108 | 0.334066299 | 0.002337354 | Leucine-rich repeat (LRR) family protein                                        |
| AT1G07963 | 1.745666395 | 3.569482214 | 0.411770646 | 0.030325666 | NA                                                                              |
| AT3G26020 | 1.752947139 | 2.45254764  | 0.024943393 | 0.001782221 | Protein phosphatase 2A regulatory B subunit family protein                      |
| AT4G31950 | 45.93501279 | 175.853851  | 0.136907858 | 1.58526E-05 | cytochrome P450%2C family 82%2C subfamily C%2C polypeptide 3                    |
| AT1G35610 | 3.327583476 | 4.06940313  | 0.416563667 | 0.046234736 | Cysteine/Histidine-rich C1 domain family protein                                |
| AT2G41105 | 9.708664386 | 22.26217179 | 0.292099833 | 0.01715521  | hypothetical protein                                                            |
| AT3G01835 | 5.321354967 | 7.901326502 | 0.18777069  | 0.031251677 | NA                                                                              |
| AT5G24430 | 1.899883108 | 3.036550401 | 0.006158426 | 0.004394203 | Calcium-dependent protein kinase (CDPK) family protein                          |
| AT3G56050 | 1.498036627 | 2.110640148 | 0.013233223 | 0.001082192 | Protein kinase family protein                                                   |
| AT1G22810 | #jDIV/0!    | #jDIV/0!    | 0.173375051 | 0.042893841 | Integrase-type DNA-binding superfamily protein                                  |
| AT1G74870 | 1.516495813 | 2.060510058 | 0.296622354 | 0.013985353 | RING/U-box superfamily protein                                                  |
| AT1G69430 | 1.671965709 | 3.31049962  | 0.174448529 | 0.006298562 | Son of sevenless protein                                                        |
| AT5G61090 | 1.865109462 | 4.15070604  | 0.166174409 | 0.039704629 | Polynucleotidyl transferase%2C ribonuclease H-like superfamily protein          |
| AT2G43620 | 1.979817422 | 4.422680828 | 0.024254672 | 0.003622592 | Chitinase family protein                                                        |
| AT3G05660 | 2.01090419  | 2.021618029 | 0.111975857 | 0.011218528 | receptor like protein 33                                                        |
| AT4G16350 | 2.298264628 | 3.702548221 | 0.166842147 | 0.01838702  | calcineurin B-like protein 6                                                    |
| AT1G24148 | 1.945408737 | 2.003204597 | 0.007241645 | 0.003583519 | hypothetical protein                                                            |
| AT1G75450 | 1.533765717 | 2.191744728 | 0.094331684 | 0.007311286 | cytokinin oxidase 5                                                             |
| AT5G24040 | 4.80889144  | 11.41119881 | 0.093320062 | 0.003643844 | F-box SKIP23-like protein (DUF295)                                              |
| AT1G07128 | 4.384243888 | 3.507579663 | 0.085590129 | 0.011433386 | NA                                                                              |
| AT1G55475 | 1.932835869 | 2.37062435  | 0.008543696 | 0.015898465 | hypothetical protein                                                            |
| AT1G28600 | 1.774580471 | 2.22767287  | 0.01583199  | 0.026074257 | GDSL-like Lipase/Acylhydrolase superfamily protein                              |

|           |             |             |             |             |                                                                                                           |
|-----------|-------------|-------------|-------------|-------------|-----------------------------------------------------------------------------------------------------------|
| AT2G18630 | 1.256008766 | 2.082297196 | 0.046032394 | 0.001681211 | transmembrane protein%2C putative (DUF677)                                                                |
| AT2G35637 | 3.37857905  | 6.634247937 | 0.076489514 | 0.015181503 | NA                                                                                                        |
| AT3G26470 | 1.922548058 | 2.28242579  | 0.010891869 | 0.01223233  | Powdery mildew resistance protein%2C RPW8 domain-containing protein                                       |
| AT2G18090 | 1.481829855 | 2.003525717 | 0.003532072 | 0.000270108 | PHD finger family protein / SWIB complex BAF60b domain-containing protein / GYF domain-containing protein |
| AT1G02880 | 3.139318111 | 3.451320944 | 0.14607177  | 0.019486591 | thiamin pyrophosphokinase1                                                                                |
| AT1G65790 | #jDIV/0!    | #jDIV/0!    | 0.077661061 | 0.010162414 | receptor kinase 1                                                                                         |
| AT1G67880 | 1.415866881 | 4.338785779 | 0.016118839 | 0.01148457  | beta-1%2C4-N-acetylglucosaminyltransferase family protein                                                 |
| AT4G22780 | 1.688341093 | 4.220232645 | 0.00695959  | 0.006914004 | ACT domain repeat 7                                                                                       |
| AT1G27180 | 1.261555975 | 2.132453647 | 0.125605777 | 0.002726605 | disease resistance protein (TIR-NBS-LRR class)                                                            |
| AT2G38290 | 1.752826989 | 2.591782689 | 0.000529119 | 0.009964932 | ammonium transporter 2                                                                                    |
| AT3G21650 | 1.782394796 | 2.628886035 | 0.007278811 | 0.000165476 | Protein phosphatase 2A regulatory B subunit family protein                                                |
| AT4G28340 | #jDIV/0!    | #jDIV/0!    | 0.422649731 | 0.00097104  | pyrroline-5-carboxylate reductase                                                                         |
| AT1G76440 | 1.489130407 | 2.792388514 | 0.334987133 | 0.00323315  | HSP20-like chaperones superfamily protein                                                                 |
| AT5G08660 | 1.763123008 | 2.045396323 | 0.000658068 | 8.26526E-05 | D-lactate dehydrogenase (DUF668)                                                                          |
| AT3G28930 | 2.553893345 | 2.968262066 | 0.303587359 | 0.042365462 | AlG2-like (avirulence induced gene) family protein                                                        |
| AT5G27765 | #jDIV/0!    | #jDIV/0!    | 0.051106935 | 0.000482836 | transmembrane protein                                                                                     |
| AT1G33720 | 1.658697718 | 2.233444078 | 0.065818396 | 0.027147514 | cytochrome P450%2C family 76%2C subfamily C%2C polypeptide 6                                              |
| AT3G02070 | 1.603487775 | 2.351897664 | 0.022878232 | 9.85639E-05 | Cysteine proteinases superfamily protein                                                                  |
| AT2G37830 | 8.258876184 | 8.633598885 | 0.108921832 | 0.034586829 | NA                                                                                                        |
| AT4G28460 | #jDIV/0!    | #jDIV/0!    | 0.084398761 | 0.010528806 | transmembrane protein                                                                                     |
| AT2G47730 | 1.830985526 | 2.665253492 | 0.014437538 | 0.004536313 | glutathione S-transferase phi 8                                                                           |
| AT2G05875 | 6.653790205 | 6.797743217 | 0.303891642 | 0.007238622 | NA                                                                                                        |
| AT5G62470 | 1.029097492 | 5.012643986 | 0.976739616 | 0.001946766 | myb domain protein 96                                                                                     |
| AT1G31130 | 1.851868771 | 4.21012336  | 0.09557278  | 0.027521856 | polyadenylate-binding protein 1-B-binding protein                                                         |
| AT5G51465 | 53.71249345 | 230.823108  | 0.079059205 | 0.002075872 | hypothetical protein                                                                                      |
| AT5G40910 | 1.620087355 | 2.241659409 | 0.165270366 | 0.004174904 | Disease resistance protein (TIR-NBS-LRR class) family                                                     |
| AT1G65310 | 1.221295196 | 2.293941041 | 0.335332622 | 0.010596073 | xyloglucan endotransglucosylase/hydrolase 17                                                              |
| AT3G07960 | 1.969355949 | 3.476340694 | 0.17647089  | 0.001531587 | Phosphatidylinositol-4-phosphate 5-kinase family protein                                                  |
| AT5G41170 | 1.710571987 | 2.94317929  | 0.036561879 | 0.001749236 | Pentatricopeptide repeat (PPR-like) superfamily protein                                                   |
| AT2G35730 | 6.212074486 | 4.244666767 | 0.063179657 | 0.033650333 | Heavy metal transport/detoxification superfamily protein                                                  |
| AT2G25850 | 1.330849963 | 2.19392521  | 0.173399196 | 0.000596156 | poly(A) polymerase 2                                                                                      |
| AT1G04053 | 1.723980298 | 2.520797341 | 0.178762247 | 0.020264539 | NA                                                                                                        |
| AT4G36010 | 1.301323674 | 2.424867464 | 0.150505208 | 0.003177679 | Pathogenesis-related thaumatin superfamily protein                                                        |
| AT5G56960 | 182.2441027 | 263.4508509 | 0.113125737 | 0.00290319  | basic helix-loop-helix (bHLH) DNA-binding family protein                                                  |
| AT3G48790 | #jDIV/0!    | #jDIV/0!    | 0.292445245 | 0.010933684 | Pyridoxal phosphate (PLP)-dependent transferases superfamily protein                                      |
| AT1G63870 | 8.74737714  | 16.23885284 | 0.222822538 | 0.023446678 | Disease resistance protein (TIR-NBS-LRR class) family                                                     |
| AT4G35380 | 1.995130737 | 4.488403798 | 0.065258187 | 0.013785807 | SEC7-like guanine nucleotide exchange family protein                                                      |
| AT1G64280 | 1.773530911 | 3.324879944 | 0.011640855 | 0.001956927 | regulatory protein (NPR1)                                                                                 |
| AT1G59124 | 2.522020626 | 3.202154944 | 0.088451073 | 0.040388644 | Disease resistance protein (CC-NBS-LRR class) family                                                      |
| AT2G28270 | #jDIV/0!    | #jDIV/0!    | 0.339633341 | 0.000772647 | Cysteine/Histidine-rich C1 domain family protein                                                          |

|           |             |             |             |             |                                                                                        |
|-----------|-------------|-------------|-------------|-------------|----------------------------------------------------------------------------------------|
| AT4G30090 | #jDIV/0!    | #jDIV/0!    | 0.141030408 | 0.001310668 | golgin family A protein                                                                |
| AT4G25020 | 1.829165036 | 2.329387224 | 0.001132729 | 0.00229372  | D111/G-patch domain-containing protein                                                 |
| AT3G13380 | 1.727138793 | 2.6163764   | 0.017766277 | 0.014752903 | BRI1-like 3                                                                            |
| AT4G02195 | 1.396300075 | 2.127254348 | 0.160543731 | 0.014511963 | syntaxin of plants 42                                                                  |
| AT3G21700 | 1.92871256  | 2.152103574 | 0.028551154 | 0.004589923 | Ras-related small GTP-binding family protein                                           |
| AT4G06135 | 3.852745093 | 3.003214449 | 0.082295326 | 0.037099198 | NA                                                                                     |
| AT5G48655 | 1.461530826 | 2.365862324 | 0.090508943 | 0.00987821  | RING/U-box superfamily protein                                                         |
| AT1G76040 | 1.639926202 | 2.297447837 | 0.040486383 | 0.020530761 | calcium-dependent protein kinase 29                                                    |
| AT4G27300 | 1.700600881 | 2.113791921 | 0.017694013 | 0.008861465 | S-locus lectin protein kinase family protein                                           |
| AT5G13485 | 22.60988303 | 20.40420148 | 0.059826084 | 0.009862023 | NA                                                                                     |
| AT5G48660 | 1.529531105 | 2.58166914  | 0.173365777 | 0.000173799 | B-cell receptor-associated protein 31-like protein                                     |
| AT1G30640 | 1.45644644  | 2.184088241 | 0.203552207 | 0.012035826 | Protein kinase family protein                                                          |
| AT4G23320 | 34.40656797 | 26.63075912 | 0.19269711  | 0.025642045 | cysteine-rich RLK (RECEPTOR-like protein kinase) 24                                    |
| AT1G56520 | 1.811487849 | 3.269987691 | 0.033770542 | 5.40977E-06 | Disease resistance protein (TIR-NBS-LRR class) family                                  |
| AT5G20400 | 1.860931006 | 3.348106084 | 0.000100988 | 0.010465108 | 2-oxoglutarate (2OG) and Fe(II)-dependent oxygenase superfamily protein                |
| AT2G47680 | 1.38785697  | 2.630442965 | 0.206235665 | 0.005906604 | zinc finger (CCCH type) helicase family protein                                        |
| AT1G58889 | 1.862681511 | 2.58613104  | 0.051070936 | 0.024478953 | NA                                                                                     |
| AT3G22910 | 1.540174372 | 5.285262679 | 0.160860127 | 0.012340736 | ATPase E1-E2 type family protein / haloacid dehalogenase-like hydrolase family protein |
| AT5G04930 | 1.619264374 | 2.476275277 | 0.031589251 | 0.000278216 | aminophospholipid ATPase 1                                                             |
| AT3G12910 | 247.3203992 | 733.4700214 | 0.058629025 | 0.003102979 | NAC (No Apical Meristem) domain transcriptional regulator superfamily protein          |
| AT1G59740 | 1.593571571 | 2.874554025 | 0.137214457 | 0.008394481 | Major facilitator superfamily protein                                                  |
| AT1G77390 | 2.221655685 | 6.731681453 | 0.129401713 | 0.001160162 | CYCLIN A1%3B2                                                                          |
| AT3G60966 | 1.7649588   | 2.205008282 | 0.008155902 | 0.021824942 | RING/U-box superfamily protein                                                         |
| AT1G64080 | 1.593961217 | 2.122603822 | 0.021267579 | 0.014455145 | membrane-associated kinase regulator                                                   |
| AT3G47210 | 1.530736188 | 2.239926642 | 0.07203636  | 0.019000985 | hypothetical protein (DUF247)                                                          |
| AT3G05580 | 2.273970899 | 6.064516191 | 0.138809093 | 0.000182341 | Calcineurin-like metallo-phosphoesterase superfamily protein                           |
| AT4G12000 | 1.467999909 | 2.135368894 | 0.24179037  | 0.048040066 | SNARE associated Golgi protein family                                                  |
| AT3G13850 | 2.291835169 | 5.507987418 | 0.449242808 | 0.01265766  | LOB domain-containing protein 22                                                       |
| AT1G71100 | 1.652182797 | 2.164820476 | 0.006280277 | 0.026147511 | Ribose 5-phosphate isomerase%2C type A protein                                         |
| AT5G65205 | 1.841830481 | 2.062503988 | 0.004857827 | 0.006402239 | NAD(P)-binding Rossmann-fold superfamily protein                                       |
| AT3G01840 | 3.389982187 | 4.692655381 | 0.161191613 | 0.029239983 | Protein kinase superfamily protein                                                     |
| AT1G71520 | 66.72809511 | 108.5997563 | 0.067531573 | 0.012067968 | Integrase-type DNA-binding superfamily protein                                         |
| AT1G56470 | 11.437599   | 16.61346847 | 0.187520332 | 0.047242657 | NA                                                                                     |
| AT1G77860 | #jDIV/0!    | #jDIV/0!    | 0.422649731 | 0.034446313 | Rhomboid-related intramembrane serine protease family protein                          |
| AT5G53230 | 3.519921787 | 5.044106805 | 0.498457166 | 0.042712793 | hypothetical protein (DUF295)                                                          |
| AT1G20320 | #jDIV/0!    | #jDIV/0!    | 0.192537272 | 0.006937933 | Haloacid dehalogenase-like hydrolase (HAD) superfamily protein                         |
| AT5G25260 | 7.81853618  | 43.26405821 | 0.088077876 | 0.00089588  | SPFH/Band 7/PHB domain-containing membrane-associated protein family                   |
| AT5G51480 | 1.584487778 | 2.232667362 | 0.264700984 | 0.003880655 | SKU5 similar 2                                                                         |
| AT3G01820 | 1.832428189 | 2.590990865 | 0.007237508 | 0.032195134 | P-loop containing nucleoside triphosphate hydrolases superfamily protein               |
| AT1G11490 | #jDIV/0!    | #jDIV/0!    | 0.184368047 | 0.013871418 | zinc finger (C2H2 type) family protein                                                 |



|           |             |             |             |             |                                                                                             |
|-----------|-------------|-------------|-------------|-------------|---------------------------------------------------------------------------------------------|
| AT1G09867 | 1.331508128 | 3.052165888 | 0.724315098 | 0.037252205 | NA                                                                                          |
| AT1G05670 | 1.745581935 | 2.710734716 | 0.040766845 | 9.73144E-05 | Pentatricopeptide repeat (PPR-like) superfamily protein                                     |
| AT1G19330 | 1.719026117 | 2.30945243  | 0.02288988  | 0.02465322  | histone deacetylase complex subunit                                                         |
| AT3G50800 | 1.897875804 | 3.308492572 | 0.113580273 | 0.01136175  | hypothetical protein                                                                        |
| AT5G39890 | 1.855787244 | 2.171754387 | 0.030952897 | 0.040918966 | 2-aminoethanethiol dioxygenase%2C putative (DUF1637)                                        |
| AT4G03460 | 23.34055799 | 65.4347836  | 0.057678553 | 0.004107508 | Ankyrin repeat family protein                                                               |
| AT1G63350 | 1.971441903 | 3.037138946 | 0.001622126 | 0.00606672  | Disease resistance protein (CC-NBS-LRR class) family                                        |
| AT4G16820 | 25.20527355 | 118.7731409 | 0.160995476 | 0.023415873 | alpha/beta-Hydrolases superfamily protein                                                   |
| AT1G74490 | 1.414009096 | 2.442047144 | 0.114417138 | 0.031905551 | Protein kinase superfamily protein                                                          |
| AT5G01830 | 2.585041879 | 5.100485331 | 0.058194678 | 0.000893578 | ARM repeat superfamily protein                                                              |
| AT3G01175 | 1.879338793 | 2.609235976 | 0.068882451 | 0.033244597 | transmembrane protein                                                                       |
| AT1G14260 | 7.645703351 | 18.87504307 | 0.110707659 | 0.010723674 | RING/FYVE/PHD zinc finger superfamily protein                                               |
| AT3G16565 | 1.999178216 | 3.804173787 | 0.137875623 | 0.017113713 | threonyl and alanyl tRNA synthetase second additional domain-containing protein             |
| AT5G09865 | 2.406104054 | 3.579628874 | 0.307493579 | 0.040668793 | NA                                                                                          |
| AT5G04310 | 1.702024138 | 2.664757538 | 0.024348864 | 0.001565564 | Pectin lyase-like superfamily protein                                                       |
| AT3G13950 | 55.90269292 | 79.84263868 | 0.070815477 | 0.004969486 | ankyrin                                                                                     |
| AT4G19003 | 1.540644661 | 2.082164899 | 0.46255453  | 0.027299783 | E2F/DP family winged-helix DNA-binding domain-containing protein                            |
| AT3G54410 | 3.733357889 | 7.098543598 | 0.490047783 | 0.002528457 | hypothetical protein (DUF1163)                                                              |
| AT5G48385 | 1.44869674  | 2.084956508 | 0.006477142 | 0.001468092 | FRIGIDA-like protein                                                                        |
| AT2G29120 | 1.393178992 | 2.111949738 | 0.194261863 | 0.037407217 | glutamate receptor 2.7                                                                      |
| AT3G57530 | 2.9747346   | 6.052221214 | 0.062523237 | 0.016266157 | calcium-dependent protein kinase 32                                                         |
| AT3G26190 | #jDIV/0!    | #jDIV/0!    | NA          | 0.040821553 | cytochrome P450%2C family 71%2C subfamily B%2C polypeptide 21                               |
| AT5G58720 | 1.737867003 | 2.732138653 | 0.024160031 | 0.004417089 | smr (Small MutS Related) domain-containing protein                                          |
| AT5G46490 | 1.705311509 | 2.483743602 | 0.034239228 | 0.012159305 | Disease resistance protein (TIR-NBS-LRR class) family                                       |
| AT3G55430 | 1.403074871 | 2.130836307 | 0.010454369 | 0.01123722  | O-Glycosyl hydrolases family 17 protein                                                     |
| AT5G46710 | 2.25989774  | 4.491041471 | 0.067288613 | 0.007474605 | PLATZ transcription factor family protein                                                   |
| AT1G30810 | 1.243847611 | 2.457980857 | 0.030291149 | 0.024836437 | Transcription factor jumonji (jmj) family protein / zinc finger (C5HC2 type) family protein |
| AT5G57010 | 7.767523584 | 21.4500395  | 0.05208432  | 0.000773148 | calmodulin-binding family protein                                                           |
| AT2G30440 | 1.936546877 | 2.346929097 | 0.008930875 | 0.000793375 | thylakoid processing peptide                                                                |
| AT4G20460 | 1.407517195 | 2.838888562 | 0.190070211 | 0.001166487 | NAD(P)-binding Rossmann-fold superfamily protein                                            |
| AT4G22530 | 1.987536911 | 2.599331305 | 0.101926143 | 0.027632714 | S-adenosyl-L-methionine-dependent methyltransferases superfamily protein                    |
| AT1G33030 | 4.17430843  | 4.179355115 | 0.105011269 | 0.002902675 | O-methyltransferase family protein                                                          |
| AT1G68330 | 2.504685864 | 5.291646959 | 0.092467459 | 0.007011341 | membrane-associated kinase regulator                                                        |
| AT2G17480 | 1.693692688 | 2.835478074 | 0.01363524  | 0.02461177  | Seven transmembrane MLO family protein                                                      |
| AT3G19553 | 1.768270341 | 2.43304795  | 0.027623915 | 0.000784238 | Amino acid permease family protein                                                          |
| AT2G20320 | 1.482355539 | 2.098737946 | 0.07163639  | 0.029092974 | DENN (AEX-3) domain-containing protein                                                      |
| AT1G51880 | 2.219128138 | 3.872159104 | 0.184899908 | 0.001860307 | root hair specific 6                                                                        |
| AT1G55460 | 1.638192244 | 2.266722664 | 0.020325697 | 2.03142E-05 | DNA/RNA-binding protein Kin17%2C conserved region                                           |
| AT1G58807 | 2.522308605 | 3.203910898 | 0.088487435 | 0.040307415 | Disease resistance protein (CC-NBS-LRR class) family                                        |
| AT4G25670 | 1.879374959 | 2.658728604 | 0.005469496 | 0.00570601  | stress response NST1-like protein                                                           |

|           |             |             |             |             |                                                                         |
|-----------|-------------|-------------|-------------|-------------|-------------------------------------------------------------------------|
| AT5G52800 | 9.261287447 | 40.45023935 | 0.223350779 | 0.038637708 | DNA primase                                                             |
| AT2G37980 | 1.918541097 | 2.344094607 | 0.027643742 | 0.003496947 | O-fucosyltransferase family protein                                     |
| AT1G51270 | 2.624143223 | 3.2701778   | 0.060358538 | 0.002802772 | vesicle-associated protein 1-4                                          |
| AT1G77250 | 1.526733556 | 2.056475682 | 0.004587897 | 0.00014502  | RING/FYVE/PHD-type zinc finger family protein                           |
| AT1G12360 | 1.418979841 | 2.806947592 | 0.013714759 | 3.50415E-05 | Sec1/munc18-like (SM) proteins superfamily                              |
| AT1G76970 | 4.787122647 | 12.72260431 | 0.167154648 | 0.005648737 | Target of Myb protein 1                                                 |
| AT1G07683 | #jDIV/0!    | #jDIV/0!    | 0.127288231 | 0.001181307 | NA                                                                      |
| AT2G20160 | #jDIV/0!    | #jDIV/0!    | 0.422649731 | 0.0433508   | E3 ubiquitin ligase SCF complex subunit SKP1/ASK1 family protein        |
| AT1G59265 | 1.854995101 | 2.659141873 | 0.066768147 | 0.0175682   | NA                                                                      |
| AT4G36945 | 1.10167632  | 2.722870584 | 0.505280436 | 0.003813481 | PLC-like phosphodiesterases superfamily protein                         |
| AT1G44100 | 1.628892753 | 2.060057995 | 0.00336237  | 0.002994883 | amino acid permease 5                                                   |
| AT4G35730 | 1.107039932 | 2.735070555 | 0.463211427 | 0.000537322 | Regulator of Vps4 activity in the MVB pathway protein                   |
| AT3G47380 | 1.734932987 | 2.781597199 | 0.00503499  | 0.016832709 | Plant invertase/pectin methylesterase inhibitor superfamily protein     |
| AT4G17500 | 1.94555223  | 2.037866893 | 0.006715033 | 0.015920525 | ethylene responsive element binding factor 1                            |
| AT5G57015 | 1.416808506 | 2.031788403 | 0.032001719 | 0.000257635 | casein kinase I-like 12                                                 |
| AT4G30600 | 1.566060113 | 2.330306162 | 0.016996007 | 0.000590968 | signal recognition particle receptor alpha subunit family protein       |
| AT1G30550 | 1.528277002 | 2.557760665 | 0.565717088 | 0.008465327 | S-adenosyl-L-methionine-dependent methyltransferase superfamily protein |
| AT5G58160 | 1.320981501 | 3.103403655 | 0.156370561 | 0.000151695 | actin binding protein                                                   |
| AT1G73510 | #jDIV/0!    | #jDIV/0!    | 0.422649731 | 0.033890301 | hypothetical protein                                                    |
| AT3G63010 | 1.915709054 | 2.180971106 | 0.037183269 | 0.000740818 | alpha/beta-Hydrolases superfamily protein                               |
| AT5G67430 | 5.037883759 | 6.703048357 | 0.212530831 | 0.003763266 | Acyl-CoA N-acyltransferases (NAT) superfamily protein                   |
| AT2G31870 | 2.865995866 | 6.324494546 | 0.055846794 | 4.8742E-06  | Poly (ADP-ribose) glycohydrolase (PARG)                                 |
| AT5G52790 | 3.507019884 | 6.972520611 | 0.314161185 | 0.009043626 | CBS domain protein with a domain protein (DUF21)                        |
| AT3G25780 | 2.123163834 | 3.369541965 | 0.064005606 | 0.02345007  | allene oxide cyclase 3                                                  |
| AT5G59450 | 1.570061358 | 2.647228445 | 0.001373363 | 0.016066403 | GRAS family transcription factor                                        |
| AT1G04625 | 7.768031189 | 9.373597331 | 0.241630217 | 0.008576808 | Polynucleotidyl transferase%2C ribonuclease H-like superfamily protein  |
| AT4G23882 | #jDIV/0!    | #jDIV/0!    | 0.1906881   | 0.024609757 | Heavy metal transport/detoxification superfamily protein                |
| AT5G35205 | 0           | 3.518333333 | 0.183542174 | 0.018354903 | NA                                                                      |
| AT1G27110 | 2.128671652 | 3.565918014 | 0.205843808 | 0.007844362 | Tetratricopeptide repeat (TPR)-like superfamily protein                 |
| AT1G23200 | 1.829251923 | 2.795686302 | 0.022790366 | 0.005906146 | Plant invertase/pectin methylesterase inhibitor superfamily             |
| AT5G03390 | 3.463169142 | 5.218104091 | 0.061833957 | 0.009754509 | hypothetical protein (DUF295)                                           |
| AT5G03720 | 1.385011812 | 2.038174368 | 0.125151037 | 0.027817753 | heat shock transcription factor A3                                      |
| AT5G54206 | #jDIV/0!    | #jDIV/0!    | NA          | 0.000842872 | NA                                                                      |
| AT5G12940 | 1.283771376 | 2.294175643 | 0.264419256 | 0.002549366 | Leucine-rich repeat (LRR) family protein                                |
| AT2G29110 | 40.05305436 | 287.8275911 | 0.051732272 | 0.028757946 | glutamate receptor 2.8                                                  |
| AT2G46330 | 1.964998329 | 2.984652075 | 0.013033898 | 1.102E-05   | arabinogalactan protein 16                                              |
| AT5G57190 | 16.7047666  | 31.83655116 | 0.059261013 | 0.030143138 | phosphatidylserine decarboxylase 2                                      |
| AT1G13500 | 2.650823328 | 2.746760268 | 0.075246062 | 0.004573232 | hypothetical protein (DUF1262)                                          |
| AT5G52740 | #jDIV/0!    | #jDIV/0!    | 0.203370467 | 0.014186634 | Copper transport protein family                                         |
| AT1G27720 | 1.622125568 | 2.036637596 | 0.16936466  | 0.035462744 | TBP-associated factor 4B                                                |

|           |             |             |             |             |                                                                          |
|-----------|-------------|-------------|-------------|-------------|--------------------------------------------------------------------------|
| AT1G31350 | 1.903612333 | 2.886650856 | 0.000421814 | 0.02313479  | KAR-UP F-box 1                                                           |
| AT4G38530 | 1.670664966 | 2.340952272 | 0.048509546 | 0.046819876 | phospholipase C1                                                         |
| AT3G07580 | 2.649387345 | 3.284700085 | 0.055905291 | 0.029751069 | hypothetical protein                                                     |
| AT1G09070 | 1.517413445 | 2.606721258 | 0.008433909 | 0.005160216 | soybean gene regulated by cold-2                                         |
| AT3G53280 | 1.529774771 | 5.469105428 | 0.001634099 | 0.022692903 | cytochrome p450 71b5                                                     |
| AT5G11250 | 2.357635236 | 3.454994072 | 0.055319148 | 0.033778529 | Disease resistance protein (TIR-NBS-LRR class)                           |
| AT4G04570 | 1.508443737 | 2.041750164 | 0.036616396 | 0.01738903  | cysteine-rich RLK (RECEPTOR-like protein kinase) 40                      |
| AT2G44180 | 1.60587212  | 2.247797383 | 0.000780803 | 0.008036535 | methionine aminopeptidase 2A                                             |
| AT3G14070 | 0.831711316 | 2.126884253 | 0.722394522 | 0.021432929 | cation exchanger 9                                                       |
| AT4G09405 | 3.021209385 | 3.75659446  | 0.424398934 | 0.015962609 | NA                                                                       |
| AT5G33382 | 1.88784869  | 2.374471433 | 0.458215091 | 0.002136345 | NA                                                                       |
| AT1G61415 | 0.72585013  | 2.199841384 | 0.619831458 | 0.046264894 | CAP-gly domain linker                                                    |
| AT5G19250 | 1.9338932   | 2.660985725 | 0.004684281 | 0.000939227 | Glycoprotein membrane precursor GPI-anchored                             |
| AT2G23450 | 1.9544034   | 2.154157956 | 0.00704335  | 0.000164715 | Protein kinase superfamily protein                                       |
| AT3G10720 | 2.746727175 | 9.063667912 | 0.072417949 | 0.008154744 | Plant invertase/pectin methylesterase inhibitor superfamily              |
| AT5G67140 | 1.715290355 | 2.362207917 | 0.067521945 | 0.000588259 | F-box/RNI-like superfamily protein                                       |
| AT4G09030 | 1.507492612 | 2.374853129 | 0.017733452 | 0.000297141 | arabinogalactan protein 10                                               |
| AT1G44740 | #jDIV/0!    | #jDIV/0!    | 0.422649731 | 0.036006069 | hypothetical protein                                                     |
| AT3G25882 | 2.836139471 | 3.323159909 | 0.126502126 | 0.040405456 | NIM1-interacting 2                                                       |
| AT4G34420 | 1.882326002 | 2.220763268 | 0.07981109  | 0.010857779 | P-loop containing nucleoside triphosphate hydrolases superfamily protein |
| AT4G01540 | 1.879315296 | 2.648329073 | 0.033661277 | 0.034043454 | NAC with transmembrane motif1                                            |
| AT1G23550 | 1.707752357 | 2.438247919 | 0.032392169 | 0.002160414 | similar to RCD one 2                                                     |
| AT3G61760 | 3.358618456 | 3.370317563 | 0.13588522  | 0.040831795 | DYNAMIN-like 1B                                                          |
| AT5G19221 | 2.749251413 | 3.543384191 | 0.234013507 | 0.00382422  | NA                                                                       |
| AT1G76210 | 1.491457414 | 3.051124947 | 0.431776247 | 0.034151382 | DUF241 domain protein%2C putative (DUF241)                               |
| AT4G23470 | 1.730690244 | 2.62117983  | 0.004021398 | 0.000676244 | PLAC8 family protein                                                     |
| AT3G45730 | 1.219657853 | 2.002024948 | 0.337040033 | 0.005924566 | hypothetical protein                                                     |
| AT2G38360 | 1.415742872 | 2.475928153 | 0.084218333 | 0.000309275 | prenylated RAB acceptor 1.B4                                             |
| AT5G09790 | 1.76237046  | 2.651051046 | 0.016837077 | 0.002842776 | TRITHORAX-RELATED PROTEIN 5                                              |
| AT3G47480 | 1.356650631 | 3.154462946 | 0.283811929 | 0.006317448 | Calcium-binding EF-hand family protein                                   |
| AT5G66320 | 1.4897943   | 2.02624695  | 0.03336189  | 0.038324423 | GATA transcription factor 5                                              |
| AT1G61560 | 100.8597611 | 166.1148405 | 0.050123472 | 0.034525651 | Seven transmembrane MLO family protein                                   |
| AT1G53080 | 26.61413037 | 61.74759168 | 0.142025265 | 0.001002326 | Legume lectin family protein                                             |
| AT1G18210 | 1.85913603  | 2.708451869 | 0.014687456 | 0.036772329 | Calcium-binding EF-hand family protein                                   |
| AT1G10990 | 2.613157981 | 3.562180303 | 0.052635869 | 0.033932376 | transmembrane protein                                                    |
| AT4G01770 | 1.762493511 | 2.626149082 | 0.01979148  | 0.011414551 | rhamnogalacturonan xylosyltransferase 1                                  |
| AT1G51900 | #jDIV/0!    | #jDIV/0!    | NA          | 0.00148551  | Regulator of Vps4 activity in the MVB pathway protein                    |
| AT3G13600 | 1.935062026 | 6.046908925 | 0.074272907 | 0.01406781  | calmodulin-binding family protein                                        |
| AT5G50680 | #jDIV/0!    | #jDIV/0!    | 0.422649731 | 0.004591717 | SUMO activating enzyme 1B                                                |
| AT1G67920 | 4.839614855 | 5.495886929 | 0.107565058 | 0.034930065 | hypothetical protein                                                     |

|           |             |             |             |             |                                                                                   |
|-----------|-------------|-------------|-------------|-------------|-----------------------------------------------------------------------------------|
| AT3G53840 | 1.754240548 | 2.171322569 | 0.282560862 | 0.006497323 | Protein kinase superfamily protein                                                |
| AT1G64700 | 1.36595146  | 2.032828528 | 0.296614232 | 0.040482548 | DUF4228 domain protein                                                            |
| AT3G25250 | 12.7144536  | 34.16787579 | 0.063351058 | 0.000888323 | AGC (cAMP-dependent%2C cGMP-dependent and protein kinase C) kinase family protein |
| AT3G54100 | 1.996928074 | 2.648851618 | 0.012591935 | 0.000746902 | O-fucosyltransferase family protein                                               |
| AT3G23120 | 3.003618712 | 5.849873472 | 0.053666993 | 0.015285369 | receptor like protein 38                                                          |
| AT1G32127 | 1.62753989  | 2.224656596 | 0.119157992 | 0.003768677 | plant viral-response family protein                                               |
| AT1G67810 | 9.004416446 | 23.20576246 | 0.075816719 | 0.002877825 | sulfur E2                                                                         |
| AT1G08860 | #jDIV/0!    | #jDIV/0!    | 0.422649731 | 0.017007681 | Calcium-dependent phospholipid-binding Copine family protein                      |
| AT1G64400 | 1.749685565 | 3.530008334 | 0.013919862 | 0.000413355 | AMP-dependent synthetase and ligase family protein                                |
| AT5G62460 | 1.308625115 | 2.38476639  | 0.101616633 | 0.035393807 | RING/FYVE/PHD zinc finger superfamily protein                                     |
| AT5G06090 | 10.86865555 | 5.741241445 | 0.107369771 | 0.029607269 | glycerol-3-phosphate acyltransferase 7                                            |
| AT5G01120 | 1.019185011 | 3.301326543 | 0.966277321 | 0.026554147 | hypothetical protein (DUF674)                                                     |
| AT2G05940 | 1.701063967 | 2.909917055 | 0.028977462 | 0.031714594 | Protein kinase superfamily protein                                                |
| AT3G45290 | 1.386603065 | 2.35397855  | 0.189912691 | 0.016166769 | Seven transmembrane MLO family protein                                            |
| AT5G13490 | 1.909108012 | 2.397386399 | 0.015400079 | 0.000143477 | ADP/ATP carrier 2                                                                 |
| AT1G15430 | 1.993115968 | 2.878502993 | 0.053399743 | 0.003327129 | hypothetical protein (DUF1644)                                                    |
| AT2G44500 | 1.510153367 | 2.534913312 | 0.040701759 | 0.000175142 | O-fucosyltransferase family protein                                               |
| AT4G00850 | 1.650794092 | 2.293992224 | 0.189897427 | 0.015701449 | GRF1-interacting factor 3                                                         |
| AT1G14750 | 1.444614177 | 2.435389044 | 0.27732286  | 0.004434003 | Cyclin family protein                                                             |
| AT1G22240 | #jDIV/0!    | #jDIV/0!    | 0.328806759 | 0.017881351 | pumilio 8                                                                         |
| AT2G04555 | 3.655612351 | 3.543361967 | 0.20077406  | 0.04136807  | NA                                                                                |
| AT5G48400 | 3.575233155 | 5.446120848 | 0.079108215 | 0.006251275 | Glutamate receptor family protein                                                 |
| AT4G08615 | #jDIV/0!    | #jDIV/0!    | 0.422649731 | 0.023356837 | NA                                                                                |
| AT5G16770 | #jDIV/0!    | #jDIV/0!    | 0.219138329 | 0.03819159  | myb domain protein 9                                                              |
| AT1G07650 | 1.315973646 | 2.54904607  | 0.163804464 | 0.004702577 | Leucine-rich repeat transmembrane protein kinase                                  |
| AT4G10530 | #jDIV/0!    | #jDIV/0!    | 0.075952821 | 0.049524552 | Subtilase family protein                                                          |
| AT5G55350 | 0.745001636 | 2.531522615 | 0.771643308 | 0.018672489 | MBOAT (membrane bound O-acyl transferase) family protein                          |
| AT1G33420 | 2.028226422 | 5.403848529 | 0.441819585 | 0.014469094 | RING/FYVE/PHD zinc finger superfamily protein                                     |
| AT3G23170 | 1.615913058 | 2.469226337 | 0.000691113 | 0.019614772 | hypothetical protein                                                              |
| AT2G04495 | 15.16599518 | 95.05123097 | 0.093019574 | 0.004545872 | transmembrane protein                                                             |
| AT1G04047 | 0.511021134 | 2.977640911 | 0.501426008 | 0.047400761 | NA                                                                                |
| AT1G74440 | 4.472950567 | 14.49725186 | 0.108274797 | 0.012961249 | ER membrane protein%2C putative (DUF962)                                          |
| AT4G37770 | 2.277626221 | 8.121819875 | 0.135784641 | 0.012343368 | 1-amino-cyclopropane-1-carboxylate synthase 8                                     |
| AT4G35110 | 2.046870624 | 3.418743788 | 0.346399577 | 9.55887E-05 | phospholipase-like protein (PEARL1 4) family protein                              |
| AT1G67460 | 1.849910891 | 2.250578633 | 0.096357882 | 0.038566246 | Minichromosome maintenance (MCM2/3/5) family protein                              |
| AT2G01300 | 0.937587747 | 2.01832451  | 0.592454487 | 0.007711318 | mediator of RNA polymerase II transcription subunit                               |
| AT1G66465 | 4.636565119 | 9.700334989 | 0.25911398  | 0.046821049 | transmembrane protein                                                             |
| AT4G25030 | 1.983055011 | 3.073851165 | 0.018035904 | 0.000893479 | Serine/Threonine-kinase                                                           |
| AT1G14420 | 4.065232093 | 4.667133169 | 0.18472866  | 0.018139594 | Pectate lyase family protein                                                      |
| AT1G04370 | 3.117180494 | 7.068116144 | 0.574076327 | 0.017494863 | Ethylene-responsive element binding factor 14                                     |

|           |             |             |             |             |                                                                                           |
|-----------|-------------|-------------|-------------|-------------|-------------------------------------------------------------------------------------------|
| AT5G49850 | 7.534794217 | 4.833944731 | 0.116257876 | 0.040063258 | Mannose-binding lectin superfamily protein                                                |
| AT3G19002 | 5.741173139 | 6.484779955 | 0.093921748 | 0.002231871 | NA                                                                                        |
| AT4G21740 | 1.614874661 | 2.024657169 | 0.01897565  | 0.01801158  | transmembrane protein                                                                     |
| AT2G21500 | 1.685665042 | 2.427694188 | 0.028019454 | 9.29218E-07 | RING/U-box superfamily protein                                                            |
| AT3G19260 | 1.361666101 | 2.136845799 | 0.24783238  | 0.009755651 | LAG1 homologue 2                                                                          |
| AT4G28550 | 2.181322095 | 6.626339265 | 0.105496648 | 0.00116144  | Ypt/Rab-GAP domain of gyp1p superfamily protein                                           |
| AT3G28315 | #jDIV/0!    | #jDIV/0!    | 0.422649731 | 0.026179123 | NA                                                                                        |
| AT3G42792 | #jDIV/0!    | #jDIV/0!    | 0.422649731 | 0.02274702  | NA                                                                                        |
| AT4G37100 | 1.840698864 | 2.17885284  | 0.080700414 | 0.002843806 | Pyridoxal phosphate (PLP)-dependent transferases superfamily protein                      |
| AT2G09925 | 4.569751441 | 7.041298598 | 0.114904426 | 0.027769885 | NA                                                                                        |
| AT2G28970 | 2.218303465 | 2.605788681 | 0.098171664 | 0.046556027 | Leucine-rich repeat protein kinase family protein                                         |
| AT3G45040 | 1.478530674 | 2.264856855 | 0.002194357 | 0.008441106 | phosphatidate cytidyltransferase family protein                                           |
| AT5G59510 | 2.66350847  | 2.998723728 | 0.134130877 | 0.00206465  | ROTUNDIFOLIA like 5                                                                       |
| AT3G63060 | 3.188160531 | 6.802687594 | 0.198766878 | 0.041168036 | EID1-like 3                                                                               |
| AT4G38830 | 3.946172918 | 4.843648215 | 0.11430545  | 0.001408162 | cysteine-rich RLK (RECEPTOR-like protein kinase) 26                                       |
| AT4G00240 | 2.161569365 | 3.119973697 | 0.050958431 | 0.001312915 | phospholipase D beta 2                                                                    |
| AT1G17260 | 6.504525979 | 12.90072763 | 0.137678896 | 0.045777682 | autoinhibited H[+]-ATPase isoform 10                                                      |
| AT4G18540 | #jDIV/0!    | #jDIV/0!    | 0.101038632 | 0.005764927 | transmembrane protein                                                                     |
| AT2G01450 | 1.850260862 | 2.041142337 | 0.009585191 | 0.007160659 | MAP kinase 17                                                                             |
| AT3G27490 | 2.52111603  | 2.262839902 | 0.086780285 | 0.014529753 | Cysteine/Histidine-rich C1 domain family protein                                          |
| AT5G01050 | 2.429400522 | 4.715132071 | 0.196869331 | 0.000441787 | Laccase/Diphenol oxidase family protein                                                   |
| AT4G22640 | 2.38803667  | 6.017871985 | 0.096417922 | 0.043101939 | Bifunctional inhibitor/lipid-transfer protein/seed storage 2S albumin superfamily protein |
| AT1G62420 | 1.852030024 | 2.37723741  | 0.040609132 | 0.002009987 | DUF506 family protein (DUF506)                                                            |
| AT2G20370 | 1.460114002 | 2.156225138 | 0.016232642 | 0.000118145 | Exostosin family protein                                                                  |
| AT3G51160 | 1.787415636 | 2.544855353 | 0.008826276 | 0.005296363 | NAD(P)-binding Rossmann-fold superfamily protein                                          |
| AT1G02405 | 3.127712685 | 3.666553203 | 0.143361528 | 0.04373361  | proline-rich family protein                                                               |
| AT2G44480 | 2.281541849 | 2.4353407   | 0.072178681 | 0.048343874 | beta glucosidase 17                                                                       |
| AT1G06135 | #jDIV/0!    | #jDIV/0!    | 0.2022426   | 0.004451649 | transmembrane protein                                                                     |
| AT4G30910 | 1.753468573 | 2.161599005 | 0.025903863 | 0.033042254 | Cytosol aminopeptidase family protein                                                     |
| AT4G17660 | #jDIV/0!    | #jDIV/0!    | 0.19176319  | 0.042653553 | Protein kinase superfamily protein                                                        |
| AT1G17255 | 1.890969646 | 2.596433016 | 0.001704953 | 0.004194562 | NA                                                                                        |
| AT3G02800 | 11.93853559 | 17.3064907  | 0.053756913 | 0.010810745 | Tyrosine phosphatase family protein                                                       |
| AT4G12710 | 1.6131628   | 2.082561049 | 0.045213053 | 0.006442694 | ARM repeat superfamily protein                                                            |
| AT4G10970 | 1.987094365 | 2.752636811 | 0.185691685 | 0.011130161 | ribosome maturation factor                                                                |
| AT1G04330 | 1.004936102 | 2.324368896 | 0.993671385 | 0.01096062  | hypothetical protein                                                                      |
| AT2G04490 | 1.40057873  | 2.194294224 | 0.017788313 | 0.000365106 | NA                                                                                        |
| AT3G49370 | 1.943007796 | 2.527506957 | 0.021283109 | 0.020886944 | Calcium-dependent protein kinase (CDPK) family protein                                    |
| AT1G65800 | 1.57437965  | 2.08454303  | 0.035282276 | 0.048820162 | receptor kinase 2                                                                         |
| AT4G39320 | 1.557330101 | 2.995728688 | 0.09218559  | 0.026846118 | microtubule-associated protein-like protein                                               |
| AT1G66700 | 34.15359332 | 26.6071083  | 0.149331769 | 0.033101309 | S-adenosyl-L-methionine-dependent methyltransferases superfamily protein                  |

|           |             |             |             |             |                                                                                           |
|-----------|-------------|-------------|-------------|-------------|-------------------------------------------------------------------------------------------|
| AT5G53130 | 1.760007676 | 2.310150696 | 0.002097786 | 0.00025647  | cyclic nucleotide gated channel 1                                                         |
| AT4G38940 | 2.323367302 | 5.039179642 | 0.094470988 | 0.009536302 | Galactose oxidase/kelch repeat superfamily protein                                        |
| AT1G13390 | 1.789798919 | 2.04341468  | 0.011399756 | 0.015364252 | translocase subunit seca                                                                  |
| AT1G59820 | 1.389443775 | 2.336091785 | 0.102579572 | 0.011220945 | aminophospholipid ATPase 3                                                                |
| AT5G62865 | 1.925462533 | 2.283246758 | 0.041769665 | 0.018298206 | hypothetical protein                                                                      |
| AT1G70420 | 2.789621433 | 7.759613795 | 0.171099981 | 0.010983685 | DNA ligase-like protein%2C putative (DUF1645)                                             |
| AT5G06560 | 1.87893388  | 2.900820615 | 0.002227286 | 1.54216E-06 | myosin-binding protein (Protein of unknown function%2C DUF593)                            |
| AT2G33640 | 1.831798836 | 2.274826319 | 0.082640507 | 0.03280087  | DHHC-type zinc finger family protein                                                      |
| AT4G06746 | 3.68101253  | 3.098307953 | 0.065454873 | 0.020489962 | related to AP2 9                                                                          |
| AT2G46500 | 1.555739954 | 2.494273264 | 0.011726546 | 0.002613116 | phosphoinositide 4-kinase gamma 4                                                         |
| AT1G35230 | 8.174738653 | 20.52923486 | 0.13201505  | 0.010251666 | arabinogalactan protein 5                                                                 |
| AT1G53390 | 1.664330551 | 2.444963894 | 0.024035468 | 0.001769804 | P-loop containing nucleoside triphosphate hydrolases superfamily protein                  |
| AT2G02800 | 1.654143371 | 2.253872212 | 0.000257765 | 3.72857E-05 | protein kinase 2B                                                                         |
| AT1G24145 | 16.47469042 | 60.38336926 | 0.082183111 | 0.003971514 | transmembrane protein                                                                     |
| AT4G35310 | 1.556000587 | 2.517930428 | 0.002414301 | 0.002593327 | calmodulin-domain protein kinase 5                                                        |
| AT1G66400 | 1.221429642 | 2.56769924  | 0.432219168 | 0.022679873 | calmodulin like 23                                                                        |
| AT3G25070 | 1.523121568 | 2.000055101 | 0.001352542 | 4.7454E-05  | RPM1 interacting protein 4                                                                |
| AT3G15200 | 1.844213769 | 3.148930075 | 0.049957862 | 0.000488772 | Tetratricopeptide repeat (TPR)-like superfamily protein                                   |
| AT4G21220 | 1.546849509 | 2.386744546 | 0.651636437 | 0.006298671 | Trimeric LpxA-like enzymes superfamily protein                                            |
| AT3G28180 | 1.702451581 | 2.146539932 | 0.000661661 | 0.04182144  | Cellulose-synthase-like C4                                                                |
| AT4G25070 | 1.602266261 | 2.691593373 | 0.084888403 | 0.004772996 | caldesmon-like protein                                                                    |
| AT5G07070 | 1.695359973 | 2.617153338 | 0.066789465 | 2.81078E-05 | CBL-interacting protein kinase 2                                                          |
| AT3G14840 | 1.656527667 | 2.041376635 | 0.003448113 | 0.004421664 | Leucine-rich repeat transmembrane protein kinase                                          |
| AT1G11000 | 1.718274318 | 2.233903132 | 0.013272621 | 0.002219942 | Seven transmembrane MLO family protein                                                    |
| AT5G37420 | #jDIV/0!    | #jDIV/0!    | 0.422649731 | 0.000724198 | hypothetical protein (DUF577)                                                             |
| AT5G58730 | 1.720765209 | 2.573980268 | 0.032335389 | 0.005224401 | pfkB-like carbohydrate kinase family protein                                              |
| AT2G29720 | 3.727128983 | 5.112759437 | 0.058748328 | 0.003393975 | FAD/NAD(P)-binding oxidoreductase family protein                                          |
| AT2G41110 | 1.884741433 | 2.210538464 | 0.017859186 | 0.001534271 | calmodulin 2                                                                              |
| AT5G36937 | #jDIV/0!    | #jDIV/0!    | NA          | 0.035692246 | NA                                                                                        |
| AT5G16910 | 1.458082731 | 3.145385305 | 0.036909991 | 0.010627157 | cellulose-synthase like D2                                                                |
| AT5G45000 | 5.23139557  | 6.240960551 | 0.157805129 | 0.026774624 | Disease resistance protein (TIR-NBS-LRR class) family                                     |
| AT3G02270 | #jDIV/0!    | #jDIV/0!    | 0.422649731 | 0.007606182 | Trimeric LpxA-like enzyme                                                                 |
| AT1G73550 | 2.09256713  | 3.447044002 | 0.055288891 | 0.004779353 | Bifunctional inhibitor/lipid-transfer protein/seed storage 2S albumin superfamily protein |
| AT1G65385 | 20.53588336 | 81.64318053 | 0.206749283 | 0.011619462 | NA                                                                                        |
| AT5G45110 | 1.649310251 | 3.155927124 | 0.109096111 | 0.002678349 | NPR1-like protein 3                                                                       |
| AT4G16890 | 1.570050322 | 2.112756847 | 0.056830019 | 0.001253509 | TIR-NBS-LRR class disease resistance protein                                              |
| AT4G30370 | 2.187273908 | 3.391230337 | 0.070157776 | 0.022780689 | RING/U-box superfamily protein                                                            |
| AT1G06840 | 1.953768945 | 3.190209692 | 0.002516892 | 0.000129301 | Leucine-rich repeat protein kinase family protein                                         |
| AT3G46930 | 5.050617823 | 13.4734433  | 0.090028447 | 0.006972066 | Protein kinase superfamily protein                                                        |
| AT4G33430 | 2.351441466 | 3.591106529 | 0.063039771 | 0.001827487 | BRI1-associated receptor kinase                                                           |

|           |             |             |             |             |                                                                                                        |
|-----------|-------------|-------------|-------------|-------------|--------------------------------------------------------------------------------------------------------|
| AT3G51440 | 1.596776474 | 2.37276365  | 0.09582789  | 9.17251E-05 | Calcium-dependent phosphotriesterase superfamily protein                                               |
| AT3G21220 | 1.360121569 | 2.156436465 | 0.062230241 | 0.018805311 | MAP kinase kinase 5                                                                                    |
| AT5G37840 | #jDIV/0!    | #jDIV/0!    | 0.226820477 | 0.045224352 | plastid movement impaired protein                                                                      |
| AT1G01440 | 1.380357264 | 2.18797683  | 0.021661514 | 0.004711639 | hypothetical protein (DUF3133)                                                                         |
| AT1G67530 | 1.911260873 | 2.275019377 | 0.106751942 | 0.011833519 | ARM repeat superfamily protein                                                                         |
| ATMG01275 | 2.534695686 | 3.266406338 | 0.250456055 | 0.046685509 | NADH dehydrogenase 1A                                                                                  |
| AT1G27100 | 1.724550211 | 2.751753308 | 0.003871456 | 0.001130517 | Actin cross-linking protein                                                                            |
| AT1G14455 | 0           | 3.848422189 | 0.200824518 | 0.023914563 | hypothetical protein                                                                                   |
| AT1G18890 | 1.839450287 | 2.761899945 | 0.005575745 | 0.000165036 | calcium-dependent protein kinase 1                                                                     |
| AT5G14480 | 1.204076761 | 2.066733913 | 0.097762897 | 0.003198913 | beta-1%2C4-N-acetylglucosaminyltransferase family protein                                              |
| AT4G31000 | 1.967862366 | 2.276743872 | 0.038087345 | 0.001878135 | Calmodulin-binding protein                                                                             |
| AT5G24510 | 3.482134514 | 2.354675851 | 0.070871803 | 0.003889325 | 60S acidic ribosomal protein family                                                                    |
| AT2G24130 | 2.68696801  | 5.71875203  | 0.341760018 | 0.005769477 | Leucine-rich receptor-like protein kinase family protein                                               |
| AT1G09537 | 3.276866025 | 3.112784856 | 0.158121538 | 0.034668903 | NA                                                                                                     |
| AT2G09225 | 2.762694553 | 4.56451363  | 0.064696707 | 0.00452796  | NA                                                                                                     |
| AT5G47710 | 1.614523324 | 2.422605763 | 0.020348436 | 0.015695827 | Calcium-dependent lipid-binding (CaLB domain) family protein                                           |
| AT2G34930 | 2.370925492 | 3.88308771  | 0.07714466  | 0.024837904 | disease resistance family protein / LRR family protein                                                 |
| AT4G10390 | 1.983229348 | 2.515558083 | 0.087132473 | 0.006783195 | Protein kinase superfamily protein                                                                     |
| AT1G32928 | 2.349287268 | 4.942715971 | 0.0834877   | 0.000333034 | Avr9/Cf-9 rapidly elicited protein                                                                     |
| AT2G07648 | #jDIV/0!    | #jDIV/0!    | 0.304566823 | 0.043109417 | hypothetical protein                                                                                   |
| AT5G49900 | 1.786580361 | 2.415433408 | 0.002552849 | 0.025976743 | Beta-glucosidase%2C GBA2 type family protein                                                           |
| AT1G29340 | 1.508593097 | 2.392212124 | 0.006389212 | 0.001589341 | plant U-box 17                                                                                         |
| AT1G05630 | 1.492936446 | 2.978438393 | 0.033449973 | 0.001367691 | Endonuclease/exonuclease/phosphatase family protein                                                    |
| AT3G45638 | 1.567698413 | 3.832028033 | 0.154391609 | 0.00208255  | NA                                                                                                     |
| AT1G74740 | 1.44533398  | 2.4514012   | 0.061259878 | 0.000683306 | calcium-dependent protein kinase 30                                                                    |
| AT2G14290 | 2.290963763 | 4.025478047 | 0.175611971 | 0.00784456  | LL-diaminopimelate protein (DUF295)                                                                    |
| AT1G70130 | 1.409333698 | 6.848044849 | 0.49698826  | 0.005483931 | Concanavalin A-like lectin protein kinase family protein                                               |
| AT1G48060 | 3.660919806 | 2.059570436 | 0.060214574 | 0.01311661  | F-box/associated interaction domain protein                                                            |
| AT4G33440 | 1.869155128 | 2.840899846 | 0.001213237 | 0.017327718 | Pectin lyase-like superfamily protein                                                                  |
| AT2G04430 | 1.23061684  | 2.003051665 | 0.54353028  | 0.03572844  | nudix hydrolase homolog 5                                                                              |
| AT5G58120 | 4.002374347 | 10.05163408 | 0.067438221 | 0.010654038 | Disease resistance protein (TIR-NBS-LRR class) family                                                  |
| AT4G12070 | 1.492253505 | 2.277517938 | 0.107201284 | 0.002789125 | hypothetical protein                                                                                   |
| AT5G09876 | #jDIV/0!    | #jDIV/0!    | 0.113490425 | 0.008146648 | hypothetical protein                                                                                   |
| AT1G74380 | 1.510614575 | 2.143351877 | 0.037020752 | 0.00110923  | xyloglucan xylosyltransferase 5                                                                        |
| AT1G61140 | 1.793873862 | 2.449362784 | 0.030643481 | 9.38037E-05 | SNF2 domain-containing protein / helicase domain-containing protein / zinc finger protein-like protein |
| AT5G64450 | 1.948053689 | 2.8048879   | 0.112414815 | 0.004129737 | NYN domain protein                                                                                     |
| AT1G66170 | 3.050930612 | 4.874168328 | 0.051154327 | 0.005246626 | RING/FYVE/PHD zinc finger superfamily protein                                                          |
| AT3G60120 | #jDIV/0!    | #jDIV/0!    | 0.057991318 | 0.049225915 | beta glucosidase 27                                                                                    |
| AT4G28800 | 1.581656109 | 2.47050577  | 0.549434252 | 0.010180846 | basic helix-loop-helix (bHLH) DNA-binding superfamily protein                                          |
| AT1G69270 | 1.88847739  | 2.989703919 | 0.008041644 | 0.004590696 | receptor-like protein kinase 1                                                                         |

|           |             |             |             |             |                                                                          |
|-----------|-------------|-------------|-------------|-------------|--------------------------------------------------------------------------|
| AT2G45760 | 10.61240348 | 70.25675011 | 0.105642649 | 0.00544675  | BON association protein 2                                                |
| AT1G67850 | 1.404355305 | 2.214858409 | 0.147869753 | 0.03115113  | lysine ketoglutarate reductase trans-splicing protein (DUF707)           |
| AT4G21730 | 1.827049983 | 2.126615965 | 0.07080065  | 0.034892818 | NA                                                                       |
| AT1G47130 | #jDIV/0!    | #jDIV/0!    | 0.065831157 | 0.015914719 | hypothetical protein                                                     |
| AT5G11290 | 1.716550482 | 3.982263    | 0.342211832 | 0.022423539 | transmembrane protein%2C putative (DUF247)                               |
| AT1G63530 | 1.836067649 | 2.490206423 | 0.023229307 | 0.000836131 | hypothetical protein                                                     |
| AT5G50200 | 1.652980747 | 2.288728383 | 0.022782668 | 0.007516967 | nitrate transmembrane transporter                                        |
| AT3G22160 | 1.958987217 | 2.168890245 | 0.006339099 | 0.014866523 | VQ motif-containing protein                                              |
| AT5G36925 | 22.32907616 | 51.7811671  | 0.064564285 | 0.001484301 | hypothetical protein                                                     |
| AT5G40180 | 4.66926592  | 4.981779491 | 0.120814687 | 0.028606957 | Pmr5/Cas1p GDSL/SGNH-like acyl-esterase family protein                   |
| AT1G19300 | 1.526102776 | 2.230992216 | 0.103850738 | 3.84843E-05 | Nucleotide-diphospho-sugar transferases superfamily protein              |
| AT2G14510 | 1.724562172 | 2.735837802 | 0.299778634 | 0.017977128 | Leucine-rich repeat protein kinase family protein                        |
| AT5G26950 | #jDIV/0!    | #jDIV/0!    | 0.202439822 | 0.000971023 | AGAMOUS-like 93                                                          |
| AT5G04720 | 1.683839754 | 2.405300437 | 0.015310723 | 0.00673176  | ADR1-like 2                                                              |
| AT3G51300 | 0           | 8.957703982 | 0.422649731 | 0.030957554 | RHO-related protein from plants 1                                        |
| AT3G29970 | #jDIV/0!    | #jDIV/0!    | NA          | 0.000233373 | B12D protein                                                             |
| AT1G18980 | 1.803358912 | 3.157632268 | 0.016259059 | 0.00132995  | RmlC-like cupins superfamily protein                                     |
| AT4G12040 | 1.638220679 | 2.506510787 | 0.041112071 | 0.000171682 | A20/AN1-like zinc finger family protein                                  |
| AT1G05753 | 2.443576938 | 3.122545803 | 0.104700213 | 0.010889339 | NA                                                                       |
| AT1G21326 | 4.122233705 | 18.15369422 | 0.086781484 | 0.004347912 | VQ motif-containing protein                                              |
| AT1G22510 | 2.033177745 | 2.667971129 | 0.127962898 | 0.002764298 | E3 ubiquitin-protein ligase RNF170-like protein (DUF 1232)               |
| AT2G32140 | 9.768546669 | 23.89065873 | 0.057996133 | 0.001742278 | transmembrane receptor                                                   |
| AT2G39530 | 1.522773705 | 3.448824714 | 0.268800361 | 0.010417938 | Uncharacterized protein family (UPF0497)                                 |
| AT5G24590 | 1.841707802 | 4.008156431 | 0.015637149 | 0.004115287 | TCV-interacting protein                                                  |
| AT4G35985 | 1.118566411 | 2.047943201 | 0.725174324 | 0.029560711 | Senescence/dehydration-associated protein-like protein                   |
| AT1G20300 | 1.642204604 | 3.512974801 | 0.025454647 | 0.009081418 | Pentatricopeptide repeat (PPR) superfamily protein                       |
| AT1G16480 | 2.275477779 | 2.578005676 | 0.228296183 | 0.000702124 | Tetratricopeptide repeat (TPR)-like superfamily protein                  |
| AT1G04100 | 1.898888325 | 2.1835687   | 0.019713672 | 0.001836324 | indoleacetic acid-induced protein 10                                     |
| AT5G23520 | 1.949075932 | 2.186609553 | 0.001577493 | 0.004620833 | smr (Small MutS Related) domain-containing protein                       |
| AT3G51660 | 2.152869414 | 4.804660031 | 0.074226133 | 0.017853775 | Tautomerase/MIF superfamily protein                                      |
| AT4G39640 | 4.536468799 | 10.76913363 | 0.052600035 | 0.010826608 | gamma-glutamyl transpeptidase 1                                          |
| AT2G06530 | 1.530150586 | 2.327602996 | 0.090775087 | 0.000691314 | SNF7 family protein                                                      |
| AT2G20150 | 8.256223345 | 30.06562906 | 0.164984969 | 3.11462E-05 | hypothetical protein                                                     |
| AT5G10830 | 1.662122465 | 2.316022151 | 0.016542966 | 0.001572437 | S-adenosyl-L-methionine-dependent methyltransferases superfamily protein |
| AT3G56400 | 1.720415104 | 2.910565173 | 0.003525509 | 0.015858649 | WRKY DNA-binding protein 70                                              |
| AT5G04020 | 1.712974477 | 2.196946376 | 0.035270215 | 0.024139766 | calmodulin binding protein                                               |
| AT4G04710 | #jDIV/0!    | #jDIV/0!    | 0.261799095 | 0.033216146 | calcium-dependent kinase-like protein                                    |
| AT3G56880 | 1.945552495 | 2.776290921 | 0.006149446 | 0.007159786 | VQ motif-containing protein                                              |
| AT4G31960 | #jDIV/0!    | #jDIV/0!    | 0.422649731 | 0.041396945 | hypothetical protein                                                     |
| AT4G31980 | 1.630891317 | 2.205249138 | 0.041943973 | 0.0032419   | PPPDE thiol peptidase family protein                                     |



|           |             |             |             |             |                                                                          |
|-----------|-------------|-------------|-------------|-------------|--------------------------------------------------------------------------|
| AT4G26400 | 1.575115615 | 2.25207143  | 0.012339563 | 0.005119762 | RING/U-box superfamily protein                                           |
| AT5G43620 | 1.848062933 | 3.526035255 | 0.002050442 | 0.000182356 | Pre-mRNA cleavage complex II                                             |
| AT2G33110 | 1.266163286 | 7.723656153 | 0.680603412 | 0.002688593 | vesicle-associated membrane protein 723                                  |
| AT5G54730 | 1.710792198 | 2.200105174 | 0.038462442 | 0.01243399  | yeast autophagy 18 F-like protein                                        |
| AT1G53620 | 6.785654909 | 11.37006991 | 0.105244512 | 0.043571358 | transmembrane protein                                                    |
| AT3G04480 | 1.668730409 | 2.117189538 | 0.036794173 | 0.000120354 | endoribonuclease                                                         |
| AT1G76650 | 1.843755399 | 3.369988806 | 0.053459339 | 0.017134086 | calmodulin-like 38                                                       |
| AT1G16150 | 26.92811432 | 62.6713356  | 0.064845483 | 0.030553601 | wall associated kinase-like 4                                            |
| AT1G34370 | 1.50752652  | 2.162883842 | 0.115972223 | 0.029824467 | C2H2 and C2HC zinc fingers superfamily protein                           |
| AT5G52050 | 1.867350582 | 3.69125608  | 0.02944412  | 0.002459022 | MATE efflux family protein                                               |
| AT4G16600 | 1.95430051  | 3.700575117 | 0.133421531 | 0.015338446 | Nucleotide-diphospho-sugar transferases superfamily protein              |
| AT1G35140 | 1.300347946 | 2.648163025 | 0.041860459 | 0.00115732  | Phosphate-responsive 1 family protein                                    |
| AT3G25221 | 1.773764782 | 3.698139588 | 0.306093902 | 0.01809424  | hypothetical protein                                                     |
| AT1G04567 | 4.892792624 | 10.1847943  | 0.108858516 | 0.044752867 | NA                                                                       |
| AT5G54060 | 1.515058936 | 2.818394736 | 0.631390594 | 0.021453584 | UDP-glucose:flavonoid 3-o-glucosyltransferase                            |
| AT3G15530 | 1.816128993 | 2.318668537 | 0.010733519 | 0.011752743 | S-adenosyl-L-methionine-dependent methyltransferases superfamily protein |
| AT4G30850 | 2.211786429 | 3.478035523 | 0.069971659 | 0.010287822 | heptahelical transmembrane protein2                                      |
| AT2G17290 | 1.580663355 | 2.135841453 | 0.041628528 | 0.020581969 | Calcium-dependent protein kinase family protein                          |
| AT5G66640 | 45.75691796 | 71.19073973 | 0.056168627 | 0.002399616 | DA1-related protein 3                                                    |
| AT1G74450 | 1.508311559 | 3.348277459 | 0.023194719 | 0.012490845 | BPS1-like protein (DUF793)                                               |
| AT1G24147 | 7.603342801 | 12.06284671 | 0.057236292 | 0.00070577  | transmembrane protein                                                    |
| AT2G41630 | 1.709250505 | 2.091405989 | 0.018447768 | 0.000537769 | transcription factor IIB                                                 |
| AT5G44050 | 1.457756337 | 2.404296396 | 0.546708921 | 0.040839177 | MATE efflux family protein                                               |
| AT1G64760 | 1.3780415   | 2.69317654  | 0.010560748 | 0.009731857 | O-Glycosyl hydrolases family 17 protein                                  |
| AT1G66080 | 1.583071757 | 2.113334745 | 0.02173986  | 0.022447752 | hikeshi-like protein                                                     |
| AT2G28080 | 1.581994548 | 2.468583174 | 0.018908496 | 0.000703757 | UDP-Glycosyltransferase superfamily protein                              |
| AT2G34650 | 1.81610462  | 2.894830073 | 0.063435083 | 0.00856742  | Protein kinase superfamily protein                                       |
| AT2G02370 | 1.79892939  | 2.424828356 | 0.048929336 | 0.00317732  | SNARE associated Golgi protein family                                    |
| AT3G04915 | #jDIV/0!    | #jDIV/0!    | NA          | 0.048500596 | NA                                                                       |
| AT1G34200 | 1.868086367 | 2.146315852 | 0.002218065 | 0.001726546 | Glyceraldehyde-3-phosphate dehydrogenase-like family protein             |
| AT2G05640 | #jDIV/0!    | #jDIV/0!    | 0.422649731 | 0.000970783 | NA                                                                       |
| AT5G60800 | 1.79907758  | 3.320010145 | 0.044062851 | 0.009676975 | Heavy metal transport/detoxification superfamily protein                 |
| AT1G76680 | 2.975789775 | 5.248189526 | 0.053670294 | 0.000714085 | 12-oxophytodienoate reductase 1                                          |
| AT3G22260 | 2.743861275 | 4.273330566 | 0.055442167 | 0.014258517 | Cysteine proteinases superfamily protein                                 |
| AT1G64820 | #jDIV/0!    | #jDIV/0!    | 0.422649731 | 0.00748706  | MATE efflux family protein                                               |
| AT1G18740 | 1.965140034 | 4.647966084 | 0.001896052 | 0.019218207 | ROH1%2C putative (DUF793)                                                |
| AT4G05910 | 2.83755416  | 3.461241082 | 0.137513148 | 0.032040256 | NA                                                                       |
| AT2G28890 | 1.76021656  | 2.29952882  | 0.014734833 | 0.000189453 | poltergeist like 4                                                       |
| AT5G22520 | 44.56577445 | 82.57333369 | 0.061319448 | 0.0044533   | hypothetical protein                                                     |
| AT4G25707 | 3.60113582  | 4.967532128 | 0.292585379 | 0.038684191 | splicing factor 3A subunit                                               |

|           |             |             |             |             |                                                                            |
|-----------|-------------|-------------|-------------|-------------|----------------------------------------------------------------------------|
| AT2G37430 | 140.7538002 | 502.6319143 | 0.06678216  | 0.00274565  | C2H2 and C2HC zinc fingers superfamily protein                             |
| AT4G04480 | 196.1901954 | 735.4967427 | 0.110317947 | 0.012252607 | F-box protein with a domain protein                                        |
| AT4G33985 | 2.494599371 | 4.241217427 | 0.138163816 | 0.008285484 | membrane insertase%2C putative (DUF1685)                                   |
| AT1G10040 | 3.867007586 | 4.573505998 | 0.081531006 | 0.019041949 | alpha/beta-Hydrolases superfamily protein                                  |
| AT4G16960 | 1.844722078 | 4.675999832 | 0.261953938 | 0.043945151 | disease resistance protein (TIR-NBS-LRR class)                             |
| AT3G57120 | 1.688020316 | 2.091121735 | 0.03081842  | 0.00732962  | Protein kinase superfamily protein                                         |
| AT2G24165 | 5.39519908  | 16.96320648 | 0.092455202 | 0.033916335 | NA                                                                         |
| AT5G28830 | 1.751810989 | 2.337332814 | 0.003873301 | 0.000191252 | calcium-binding EF hand family protein                                     |
| AT1G18900 | 1.754617528 | 2.635787482 | 0.036649868 | 0.000475408 | Pentatricopeptide repeat (PPR) superfamily protein                         |
| AT1G05340 | 1.554623867 | 2.273005584 | 0.019652822 | 9.12437E-06 | cysteine-rich TM module stress tolerance protein                           |
| AT5G06490 | #jDIV/0!    | #jDIV/0!    | 0.069006124 | 0.022045602 | RING/U-box superfamily protein                                             |
| AT4G25380 | 1.747221744 | 2.799616296 | 0.503236512 | 0.046796042 | stress-associated protein 10                                               |
| AT4G19510 | 1.697841813 | 2.010681951 | 0.004111559 | 0.001857571 | Disease resistance protein (TIR-NBS-LRR class)                             |
| AT1G57650 | #jDIV/0!    | #jDIV/0!    | 0.422649731 | 0.037097739 | ATP binding protein                                                        |
| AT3G11650 | 1.291358391 | 2.079072917 | 0.090473611 | 0.005300283 | NDR1/HIN1-like 2                                                           |
| AT5G24600 | 2.235534056 | 4.846394414 | 0.190188134 | 0.006129162 | TRP-like ion channel protein (Protein of unknown function%2C DUF599)       |
| AT2G30250 | 1.942593642 | 2.629002983 | 0.00100703  | 0.000266618 | WRKY DNA-binding protein 25                                                |
| AT1G01340 | 6.540539727 | 15.60460249 | 0.064789582 | 0.002544976 | cyclic nucleotide gated channel 10                                         |
| AT5G67630 | 1.613943945 | 2.013260526 | 0.049759856 | 0.020176106 | P-loop containing nucleoside triphosphate hydrolases superfamily protein   |
| AT4G24400 | 1.643739148 | 2.086929074 | 0.014147011 | 0.002366026 | CBL-interacting protein kinase 8                                           |
| AT3G13210 | 1.640319486 | 28.90417103 | 0.656564623 | 0.008326249 | crooked neck protein%2C putative / cell cycle protein                      |
| AT1G20060 | 0.98892019  | 2.491404082 | 0.97402254  | 0.024263956 | ATP binding microtubule motor family protein                               |
| AT2G36210 | 1.800928454 | 4.536095513 | 0.005999563 | 0.003894309 | SAUR-like auxin-responsive protein family                                  |
| AT2G04515 | 5.519791858 | 16.74499413 | 0.073996793 | 0.031812837 | transmembrane protein                                                      |
| AT1G07647 | 3.622001904 | 7.702491032 | 0.355526931 | 0.049681545 | NA                                                                         |
| AT4G30290 | 1.923950179 | 3.507153697 | 0.092604563 | 0.025763167 | xyloglucan endotransglucosylase/hydrolase 19                               |
| AT4G08555 | 8.982458275 | 19.66174144 | 0.087703194 | 0.029162473 | hypothetical protein                                                       |
| AT4G36280 | #jDIV/0!    | #jDIV/0!    | 0.1860588   | 0.014268575 | Histidine kinase-%2C DNA gyrase B-%2C and HSP90-like ATPase family protein |
| AT2G15042 | 8.124738041 | 4.908007381 | 0.127081385 | 0.009386956 | Leucine-rich repeat (LRR) family protein                                   |
| AT2G27260 | 1.457285543 | 2.081880437 | 0.00854782  | 6.26182E-05 | Late embryogenesis abundant (LEA) hydroxyproline-rich glycoprotein family  |
| AT5G38250 | #jDIV/0!    | #jDIV/0!    | 0.422649731 | 0.012766115 | Protein kinase family protein                                              |
| AT1G06140 | 1.667695574 | 4.426078031 | 0.143121273 | 2.17373E-05 | Pentatricopeptide repeat (PPR) superfamily protein                         |
| AT5G63490 | 1.734197629 | 2.109644751 | 0.028770819 | 0.000368945 | CBS / octicosapeptide/Phox/Bemp1 (PB1) domains-containing protein          |
| AT3G10300 | 1.814368638 | 3.463137822 | 0.028564166 | 0.006303302 | Calcium-binding EF-hand family protein                                     |
| AT4G11900 | 1.646558338 | 3.861105463 | 0.089702628 | 0.002500239 | S-locus lectin protein kinase family protein                               |
| AT1G16420 | 33.4713518  | 29.81336916 | 0.090717403 | 0.005319989 | metacaspase 8                                                              |
| AT1G59860 | 2.4572825   | 2.644790367 | 0.064679216 | 0.005694995 | HSP20-like chaperones superfamily protein                                  |
| AT3G02880 | 1.817851431 | 3.512141057 | 0.004734293 | 0.00111257  | Leucine-rich repeat protein kinase family protein                          |
| AT1G12580 | 1.423017246 | 2.14234826  | 0.042261332 | 0.000180547 | phosphoenolpyruvate carboxylase-related kinase 1                           |
| AT1G61470 | 3.703280576 | 10.30132193 | 0.084872722 | 0.001610296 | Polynucleotidyl transferase%2C ribonuclease H-like superfamily protein     |

|           |             |             |             |             |                                                       |
|-----------|-------------|-------------|-------------|-------------|-------------------------------------------------------|
| AT3G06435 | 1.503894759 | 2.133139705 | 0.025656657 | 0.017162368 | Expressed protein                                     |
| AT5G48657 | 9.322901649 | 13.65103839 | 0.065928346 | 0.011675846 | defense protein-like protein                          |
| AT1G76360 | 1.740411968 | 3.367750403 | 0.007522494 | 0.00011648  | Protein kinase superfamily protein                    |
| AT1G61260 | 1.662222168 | 2.718739742 | 0.026474182 | 0.001625116 | cotton fiber (DUF761)                                 |
| AT1G49050 | 1.445570109 | 2.441654006 | 0.006335578 | 9.99925E-05 | Eukaryotic aspartyl protease family protein           |
| AT5G01380 | 1.754844122 | 2.79031903  | 0.033786857 | 0.013646636 | Homeodomain-like superfamily protein                  |
| AT1G26730 | 1.809245129 | 2.519158568 | 0.168824841 | 0.017264026 | EXS (ERD1/XPR1/SYG1) family protein                   |
| AT1G16640 | 1.881361068 | 5.160361518 | 0.165782589 | 0.033399659 | AP2/B3-like transcriptional factor family protein     |
| AT1G66920 | 2.715088213 | 2.466665934 | 0.050182491 | 0.012544653 | Protein kinase superfamily protein                    |
| AT2G08585 | 3.016436105 | 4.948852408 | 0.574877493 | 0.018390682 | NA                                                    |
| AT2G18670 | 1.507730465 | 2.172003401 | 0.245321321 | 0.009033414 | RING/U-box superfamily protein                        |
| AT4G08500 | 1.982092217 | 2.913266425 | 0.010032391 | 0.000216642 | MAPK/ERK kinase kinase 1                              |
| AT1G17600 | 1.7640024   | 3.04471464  | 0.165064054 | 0.029630046 | Disease resistance protein (TIR-NBS-LRR class) family |
| AT2G36430 | 1.833669637 | 2.622853321 | 0.029751565 | 0.004048838 | transmembrane protein%2C putative (DUF247)            |
| AT5G44290 | 1.997611027 | 2.534375051 | 0.00290168  | 0.000862838 | Protein kinase superfamily protein                    |
| AT1G61890 | 1.891041976 | 2.785345205 | 0.024736339 | 0.024305105 | MATE efflux family protein                            |
| AT2G39360 | 1.278093084 | 2.018081288 | 0.056250194 | 0.020192466 | Protein kinase superfamily protein                    |
| AT1G53060 | 1.996704489 | 3.040006396 | 0.04904785  | 0.000502588 | Legume lectin family protein                          |
| AT2G47140 | 9.061844232 | 13.91532365 | 0.104637922 | 0.024255545 | NAD(P)-binding Rossmann-fold superfamily protein      |
| AT5G46295 | 25.73905721 | 43.32027276 | 0.053775859 | 0.022931053 | transmembrane protein                                 |
| AT4G37022 | 1.637944018 | 2.357107604 | 0.128073414 | 0.009696618 | hypothetical protein                                  |
| AT1G09363 | 2.413256956 | 5.210315955 | 0.386773589 | 0.013394623 | NA                                                    |
| AT3G18560 | 1.302995673 | 2.095814026 | 0.159526281 | 0.000740262 | hypothetical protein                                  |
| AT1G07160 | 65.68060191 | 312.4938841 | 0.068743502 | 0.002094579 | Protein phosphatase 2C family protein                 |
| AT1G11925 | 1.896491234 | 14.44964868 | 0.073220062 | 0.023835664 | Stigma-specific Stig1 family protein                  |
| AT4G28420 | #jDIV/0!    | #jDIV/0!    | 0.063357972 | 0.04420765  | Tyrosine transaminase family protein                  |
| AT3G23123 | #jDIV/0!    | #jDIV/0!    | 0.05231455  | 0.038724481 | transmembrane protein                                 |
| AT1G61490 | 1.999541333 | 2.500375252 | 0.00514689  | 0.030523571 | S-locus lectin protein kinase family protein          |
| AT3G00970 | #jDIV/0!    | #jDIV/0!    | 0.183983935 | 0.015023616 | NA                                                    |
| AT3G48780 | 1.585151649 | 2.006430593 | 0.019722958 | 0.00207243  | serine palmitoyltransferase 1                         |
| AT4G11530 | 1.856336738 | 2.323802968 | 0.010509857 | 0.001334048 | cysteine-rich RLK (RECEPTOR-like protein kinase) 34   |
| AT2G44383 | 1.936188034 | 2.071186989 | 0.176654721 | 0.00709316  | NA                                                    |
| AT3G47875 | 8.997475361 | 6.544917232 | 0.202590264 | 0.044867428 | NA                                                    |
| AT1G78955 | 1.613985874 | 3.889603519 | 0.211178966 | 0.006908184 | camelliol C synthase 1                                |
| AT4G07960 | 1.588207742 | 3.275226333 | 0.095362845 | 0.016010428 | Cellulose-synthase-like C12                           |
| AT4G23230 | #jDIV/0!    | #jDIV/0!    | 0.194581166 | 0.015719544 | cysteine-rich RECEPTOR-like kinase                    |
| AT5G13200 | 1.982072524 | 2.809192745 | 0.079519113 | 4.65032E-05 | GRAM domain family protein                            |
| AT5G57510 | 6.781034124 | 33.44612845 | 0.081276211 | 0.001604565 | cotton fiber protein                                  |
| AT3G55840 | 14.03248662 | 40.92593878 | 0.067792579 | 0.003338919 | Hs1pro-1 protein                                      |
| AT2G33780 | 24.41249826 | 32.76264402 | 0.277717632 | 0.048919526 | VQ motif-containing protein                           |

|           |             |             |             |             |                                                                                        |
|-----------|-------------|-------------|-------------|-------------|----------------------------------------------------------------------------------------|
| AT2G35510 | 1.453648431 | 2.11917522  | 0.077138646 | 0.003817644 | similar to RCD one 1                                                                   |
| AT4G16892 | 2.465019987 | 2.546101514 | 0.187673086 | 0.035535173 | NA                                                                                     |
| AT4G00300 | 1.574959715 | 2.748493645 | 0.02590898  | 0.016154286 | receptor-like kinase                                                                   |
| AT1G01260 | 1.865461607 | 2.605019971 | 0.165472491 | 0.000120276 | basic helix-loop-helix (bHLH) DNA-binding superfamily protein                          |
| AT2G30990 | 1.525198552 | 2.028582303 | 0.08315637  | 0.003105808 | arginine N-methyltransferase%2C putative (DUF688)                                      |
| AT1G19780 | 5.425640716 | 8.39349591  | 0.100850192 | 0.018204789 | cyclic nucleotide gated channel 8                                                      |
| AT1G67970 | 1.803682243 | 2.560328012 | 0.006193308 | 0.006700777 | heat shock transcription factor A8                                                     |
| AT3G51890 | 1.939135471 | 2.781718776 | 0.018843078 | 0.001452242 | Clathrin light chain protein                                                           |
| AT2G44070 | 1.162342285 | 3.274560223 | 0.733036913 | 0.021492088 | NagB/RpiA/CoA transferase-like superfamily protein                                     |
| AT2G24610 | 1.890533251 | 4.092728352 | 0.115120012 | 0.000127748 | cyclic nucleotide-gated channel 14                                                     |
| AT2G32200 | 3.580595461 | 11.35632237 | 0.075341876 | 0.009665573 | cysteine-rich/transmembrane domain A-like protein                                      |
| AT1G25220 | 4.23363378  | 3.887596346 | 0.051411231 | 0.034131636 | anthranilate synthase beta subunit 1                                                   |
| AT2G04305 | 1.412022466 | 2.070100829 | 0.013286761 | 0.002677939 | Magnesium transporter CorA-like family protein                                         |
| AT3G53150 | 1.923959808 | 3.82110081  | 0.065256919 | 0.0249641   | UDP-glucosyl transferase 73D1                                                          |
| AT3G13900 | 7.129207724 | 8.329149145 | 0.050075064 | 0.042697273 | ATPase E1-E2 type family protein / haloacid dehalogenase-like hydrolase family protein |
| AT2G37370 | 2.168749568 | 5.265621763 | 0.660161994 | 0.038747273 | centrosomal protein of 135 kDa-like protein                                            |
| AT1G58400 | 1.387838508 | 2.219485599 | 0.151117507 | 0.024035341 | Disease resistance protein (CC-NBS-LRR class) family                                   |
| AT2G28920 | #jDIV/0!    | #jDIV/0!    | 0.422649731 | 0.000970914 | RING/U-box superfamily protein                                                         |
| AT3G03050 | 1.292160749 | 2.024597378 | 0.09055422  | 0.016172696 | cellulose synthase-like D3                                                             |
| AT2G02010 | 5.003522143 | 18.94597535 | 0.130972035 | 0.003654485 | glutamate decarboxylase 4                                                              |
| AT1G79330 | 1.354344128 | 2.119578784 | 0.561048438 | 0.012421179 | metacaspase 5                                                                          |
| AT4G37640 | 2.730916735 | 8.310833554 | 0.051757268 | 0.005389571 | calcium ATPase 2                                                                       |
| AT1G59850 | 1.21684286  | 3.008941453 | 0.623957118 | 0.037560626 | ARM repeat superfamily protein                                                         |
| AT2G32820 | #jDIV/0!    | #jDIV/0!    | 0.422649731 | 0.037526967 | Transcription elongation factor (TFIIS) family protein                                 |
| AT2G30690 | 4.560600535 | 4.18153416  | 0.092624896 | 0.020774797 | lateral signaling target-like protein (Protein of unknown function%2C DUF593)          |
| AT3G48650 | 18.81977742 | 84.57223255 | 0.085925364 | 0.026726786 | NA                                                                                     |
| AT3G19970 | 1.841753151 | 4.844662951 | 0.076926249 | 0.003368834 | alpha/beta-Hydrolases superfamily protein                                              |
| AT2G03925 | #jDIV/0!    | #jDIV/0!    | 0.231147848 | 0.016757673 | NA                                                                                     |
| AT5G22680 | 5.69138431  | 13.17113429 | 0.251733061 | 0.00066135  | F-box protein                                                                          |
| AT3G20410 | 1.665663164 | 2.419983638 | 0.003949273 | 0.014296572 | calmodulin-domain protein kinase 9                                                     |
| AT5G64300 | 1.476138759 | 2.083550008 | 0.00831788  | 0.00951029  | GTP cyclohydrolase II                                                                  |
| AT1G56060 | 23.10487781 | 115.9691159 | 0.156571217 | 0.011978251 | cysteine-rich/transmembrane domain protein B                                           |
| AT4G33920 | 1.688648455 | 3.51245444  | 0.001282866 | 0.014658404 | Protein phosphatase 2C family protein                                                  |
| AT5G45750 | 1.587725513 | 2.199562744 | 0.013655235 | 0.001743945 | RAB GTPase homolog A1C                                                                 |
| AT5G39090 | 2.114760804 | 2.078931577 | 0.05595697  | 0.008888657 | HXXXD-type acyl-transferase family protein                                             |
| AT5G43890 | 1.300885256 | 2.60389597  | 0.154376696 | 0.0017407   | Flavin-binding monooxygenase family protein                                            |
| AT4G21700 | 1.402320879 | 2.085743227 | 0.013825991 | 0.000478302 | DUF2921 family protein%2C putative (DUF2921)                                           |
| AT3G05360 | 2.294024309 | 3.127270821 | 0.055622477 | 0.022718271 | receptor like protein 30                                                               |
| AT3G46330 | 2.283741237 | 2.988461562 | 0.128041081 | 0.041572904 | Leucine-rich repeat protein kinase family protein                                      |
| AT5G00965 | #jDIV/0!    | #jDIV/0!    | 0.422649731 | 0.045168092 | NA                                                                                     |

|           |             |             |             |             |                                                                                                    |
|-----------|-------------|-------------|-------------|-------------|----------------------------------------------------------------------------------------------------|
| AT1G07897 | 6.683268657 | 5.244743972 | 0.230906232 | 0.03386415  | NA                                                                                                 |
| AT2G20110 | 1.77864796  | 2.124096667 | 0.009210433 | 0.001957151 | Tesmin/TSO1-like CXC domain-containing protein                                                     |
| AT1G11200 | 1.687319313 | 4.492423677 | 0.026430208 | 0.009176675 | organic solute transporter ostalpha protein (DUF300)                                               |
| AT1G01130 | 2.339436555 | 2.354485149 | 0.135808569 | 0.000252161 | CBL-interacting Serine/Threonine-kinase                                                            |
| AT1G04200 | 1.52210099  | 2.191833874 | 0.099077933 | 0.00162747  | dyggve-melchior-clausen syndrome protein                                                           |
| AT1G03770 | 1.750294809 | 2.10005463  | 0.137143192 | 0.041847031 | RING 1B                                                                                            |
| AT5G53830 | 1.30003604  | 2.374700854 | 0.187865567 | 0.004562488 | VQ motif-containing protein                                                                        |
| AT3G56710 | 3.988729812 | 7.829032351 | 0.058107055 | 0.001642171 | sigma factor binding protein 1                                                                     |
| AT5G22380 | #jDIV/0!    | #jDIV/0!    | 0.141163907 | 0.005658343 | NAC domain containing protein 90                                                                   |
| AT3G52870 | 1.907581246 | 2.379768432 | 0.01687822  | 0.000344998 | IQ calmodulin-binding motif family protein                                                         |
| AT4G15070 | 1.383199974 | 2.144655365 | 0.187584943 | 0.039411215 | Cysteine/Histidine-rich C1 domain family protein                                                   |
| AT4G30060 | 1.884406425 | 3.058366345 | 0.090326982 | 0.006192782 | Core-2/I-branching beta-1%2C6-N-acetylglucosaminyltransferase family protein                       |
| AT5G66850 | 1.91117453  | 4.63392743  | 0.038902252 | 0.003879402 | mitogen-activated protein kinase kinase kinase 5                                                   |
| AT4G26095 | 2.001652868 | 3.241092497 | 0.066215062 | 0.001089593 | NA                                                                                                 |
| AT1G18970 | 2.896401846 | 7.073537819 | 0.139894654 | 0.005374015 | germin-like protein 4                                                                              |
| AT2G15040 | 6.117443707 | 6.586277776 | 0.231275245 | 0.027976877 | NA                                                                                                 |
| AT5G03630 | 1.595011278 | 2.157095773 | 0.009480283 | 0.010739402 | Pyridine nucleotide-disulfide oxidoreductase family protein                                        |
| AT5G62560 | 1.507287717 | 2.162089643 | 0.000136804 | 0.000102521 | RING/U-box superfamily protein with ARM repeat domain-containing protein                           |
| AT2G43320 | 1.686964505 | 2.655935163 | 0.2117638   | 0.010441218 | S-adenosyl-L-methionine-dependent methyltransferases superfamily protein                           |
| AT1G29290 | 1.818613573 | 4.464911039 | 0.173326977 | 0.000108796 | B-cell lymphoma 6 protein                                                                          |
| AT5G37770 | 1.443721379 | 2.978260527 | 0.248484097 | 0.002014309 | EF hand calcium-binding protein family                                                             |
| AT2G23420 | 1.239695125 | 2.941425098 | 0.151823199 | 0.004796202 | nicotinate phosphoribosyltransferase 2                                                             |
| AT1G65240 | 2.608758114 | 6.266563852 | 0.107789894 | 0.003085279 | Eukaryotic aspartyl protease family protein                                                        |
| AT3G47130 | 1.343098154 | 2.43455279  | 0.404483385 | 0.030376238 | F-box associated ubiquitination effector family protein                                            |
| AT3G02430 | #jDIV/0!    | #jDIV/0!    | 0.422649731 | 0.043108163 | transmembrane protein%2C putative (DUF679)                                                         |
| AT5G56510 | #jDIV/0!    | #jDIV/0!    | 0.422649731 | 0.00082844  | pumilio 12                                                                                         |
| AT3G57380 | 2.173331063 | 2.498501726 | 0.121977458 | 0.043126406 | Glycosyltransferase family 61 protein                                                              |
| AT4G35500 | 1.484663397 | 2.62352029  | 0.093364656 | 0.000686902 | Protein kinase superfamily protein                                                                 |
| AT2G01379 | #jDIV/0!    | #jDIV/0!    | 0.277717561 | 0.013871356 | transmembrane protein                                                                              |
| AT4G23070 | 1.767569949 | 2.456764692 | 0.029109791 | 0.004949296 | RHOMBOID-like protein 7                                                                            |
| AT1G01560 | 23.35399694 | 101.1637906 | 0.055744667 | 0.002928214 | MAP kinase 11                                                                                      |
| AT5G42140 | 1.381345253 | 2.076559832 | 0.097962411 | 0.000730452 | Regulator of chromosome condensation (RCC1) family with FYVE zinc finger domain-containing protein |
| AT2G09025 | #jDIV/0!    | #jDIV/0!    | 0.422649731 | 0.035803252 | NA                                                                                                 |
| AT2G20950 | 1.891774851 | 2.23640256  | 0.052817935 | 0.007953012 | phospholipase-like protein (PEARL1 4) family protein                                               |
| AT1G48320 | 1.593670171 | 2.099476911 | 0.114975457 | 0.009749142 | Thioesterase superfamily protein                                                                   |
| AT2G44600 | 1.547175602 | 2.046246453 | 0.054214354 | 0.02348531  | hypothetical protein                                                                               |
| AT2G20880 | 1.302637054 | 6.678925714 | 0.697163025 | 0.014617962 | Integrase-type DNA-binding superfamily protein                                                     |
| AT5G50580 | #jDIV/0!    | #jDIV/0!    | 0.184499069 | 0.00468988  | SUMO-activating enzyme 1B                                                                          |
| AT3G52710 | 1.94691299  | 3.022814649 | 0.028289002 | 6.41895E-05 | hypothetical protein                                                                               |
| AT3G23030 | 1.834877568 | 2.173260794 | 0.102259714 | 0.000304625 | indole-3-acetic acid inducible 2                                                                   |

|           |             |             |             |             |                                                                           |
|-----------|-------------|-------------|-------------|-------------|---------------------------------------------------------------------------|
| AT1G14740 | 1.641777302 | 2.243398417 | 0.0101255   | 0.00027438  | class I heat shock protein%2C putative (DUF1423)                          |
| AT1G63500 | 1.56289255  | 2.241504758 | 0.00383869  | 0.000301631 | kinase with tetratricopeptide repeat domain-containing protein            |
| AT3G15358 | 1.60151726  | 3.275243799 | 0.22183412  | 0.021193991 | transmembrane protein                                                     |
| AT3G07780 | 1.445371243 | 2.049557388 | 0.023615662 | 0.003144391 | potyvirus VPg interacting protein (DUF1423)                               |
| AT1G33760 | 3.269825786 | 6.432167939 | 0.078836383 | 3.27349E-05 | Integrase-type DNA-binding superfamily protein                            |
| AT1G10650 | 1.339487736 | 2.141591188 | 0.020812699 | 0.002034785 | SBP (S-ribonuclease binding protein) family protein                       |
| AT1G19270 | 1.932843202 | 2.671873841 | 0.007032784 | 0.004961615 | DA1                                                                       |
| AT5G52870 | 1.791526606 | 2.42286689  | 0.057963585 | 0.002005481 | membrane-associated kinase regulator                                      |
| AT3G27560 | 1.789090155 | 2.966357696 | 0.002082109 | 0.005061545 | Protein kinase superfamily protein                                        |
| AT5G61380 | 1.755997354 | 2.631287428 | 0.006491309 | 0.009168596 | CCT motif -containing response regulator protein                          |
| AT3G61640 | 1.429193485 | 2.576372474 | 0.024280261 | 0.000482051 | arabinogalactan protein 20                                                |
| AT3G20590 | 1.15281809  | 2.349485003 | 0.583585621 | 0.027440367 | Late embryogenesis abundant (LEA) hydroxyproline-rich glycoprotein family |
| AT5G11140 | 79.42778568 | 484.5071763 | 0.089501309 | 0.006266564 | phospholipase-like protein (PEARL1 4) family protein                      |
| AT2G32800 | 1.730751759 | 3.333212134 | 0.098952586 | 2.95149E-05 | protein kinase family protein                                             |
| AT5G02490 | 1.312514331 | 2.031729536 | 0.013847201 | 0.020483368 | Heat shock protein 70 (Hsp 70) family protein                             |
| AT5G39100 | #jDIV/0!    | #jDIV/0!    | 0.110104802 | 0.025545259 | germin-like protein 6                                                     |
| AT1G72760 | 2.032142966 | 2.191525421 | 0.148243433 | 0.024768289 | Protein kinase superfamily protein                                        |
| AT3G20520 | 3.58598026  | 8.957699713 | 0.308423493 | 0.008253932 | SHV3-like 3                                                               |
| AT2G21120 | 1.764344437 | 2.684551156 | 0.001001666 | 0.000805219 | magnesium transporter%2C putative (DUF803)                                |
| AT2G27080 | 1.80314393  | 3.466297641 | 0.006587943 | 0.018609489 | Late embryogenesis abundant (LEA) hydroxyproline-rich glycoprotein family |
