# Supplementary material for: Cell wall‐derived mixed‐linked β‐1,3/1,4‐glucans trigger immune responses and disease resistance in plants
Source: PubMed Central journal article supplement — Plant J. 2021 Mar 22;106(3):601–15. doi: 10.1111/tpj.15185 (PMC8252745; doi:10.1111/tpj.15185), 2021-03-22
Supplement: TPJ-106-601-s006.pdf [file TPJ-106-601-s006.pdf]

**Table S4:** Classification of down-regulated genes into common and specific when comparing chitohexaose and MLG43 treatments in Col-0 plants

|  |                                           |
|--|-------------------------------------------|
|  | MLG43 specific genes vs chitohexaose      |
|  | MLG43 and chitohexaose common genes       |
|  | Chitohexaose specific genes against MLG43 |

| gene ID   | n-fold MLG43 | n-fold Chi6 | p-value MLG43 | p-value Chi6 | Annotation                                                                                |
|-----------|--------------|-------------|---------------|--------------|-------------------------------------------------------------------------------------------|
| AT3G50310 | 0.499546061  | 0.664005527 | 0.024788647   | 0.074758797  | mitogen-activated protein kinase kinase kinase 20                                         |
| AT1G65420 | 0.494831383  | 0.963204513 | 0.019058279   | 0.889719213  | antigen receptor-like protein (DUF565)                                                    |
| AT1G46480 | 0.494044455  | 0.702101426 | 0.030316148   | 0.240730096  | WUSCHEL related homeobox 4                                                                |
| AT5G59200 | 0.490414599  | 0.803055963 | 0.04216381    | 0.409678145  | Tetratricopeptide repeat (TPR)-like superfamily protein                                   |
| AT1G33817 | 0.484016198  | 1.0086537   | 0.022061582   | 0.973586634  | NA                                                                                        |
| AT4G06534 | 0.48272521   | 0.695609173 | 0.027277909   | 0.083495833  | transmembrane protein                                                                     |
| AT2G35060 | 0.474834645  | 0.537477539 | 0.027501266   | 0.001184284  | K+ uptake permease 11                                                                     |
| AT5G23870 | 0.472815629  | 0.524331888 | 0.026445309   | 0.029622255  | Pectinacylesterase family protein                                                         |
| AT2G46567 | 0.467771865  | 2.799770894 | 0.040345896   | 0.486054094  | hypothetical protein                                                                      |
| AT5G42370 | 0.4581834    | 1.217494519 | 0.030303394   | 0.153883878  | Calcineurin-like metallo-phosphoesterase superfamily protein                              |
| AT4G21215 | 0.455974421  | 0.521836935 | 0.003433642   | 0.002757803  | transmembrane protein                                                                     |
| AT4G12910 | 0.454710316  | 1.012726722 | 0.022184768   | 0.968836806  | serine carboxypeptidase-like 20                                                           |
| AT3G63200 | 0.451290542  | 0.602279671 | 0.002595155   | 0.047033825  | PATATIN-like protein 9                                                                    |
| AT5G03695 | 0.436668011  | 0.383205648 | 0.03065079    | 0.111072806  | NA                                                                                        |
| AT1G18280 | 0.433121738  | 0.795632754 | 0.020099983   | 0.47963334   | Bifunctional inhibitor/lipid-transfer protein/seed storage 2S albumin superfamily protein |
| AT2G30820 | 0.418012533  | 1.050341284 | 0.016279484   | 0.906786516  | aspartyl/glutamyl-tRNA(Asn/Gln) amidotransferase subunit                                  |
| AT1G21220 | 0.406947193  | 0.657607238 | 0.013208182   | 0.092198486  | NA                                                                                        |
| AT5G38010 | 0.39734179   | 0.536552037 | 0.025960077   | 0.03114796   | UDP-Glycosyltransferase superfamily protein                                               |
| AT1G62350 | 0.39497947   | 0.57603056  | 0.031442929   | 0.101279805  | Pentatricopeptide repeat (PPR) superfamily protein                                        |
| AT4G14140 | 0.375042691  | 0.510588162 | 0.002635295   | 0.066314117  | DNA methyltransferase 2                                                                   |
| AT2G36270 | 0.368753777  | 0.823972801 | 0.027185459   | 0.332338594  | Basic-leucine zipper (bZIP) transcription factor family protein                           |
| AT4G26288 | 0.360819686  | 0.697820357 | 0.010773687   | 0.401521532  | hypothetical protein                                                                      |
| AT5G41460 | 0.360213475  | 0.708697711 | 0.01468572    | 0.138047004  | transferring glycosyl group transferase (DUF604)                                          |
| AT5G20690 | 0.343845552  | 0.521246299 | 0.049358905   | 0.287137555  | Leucine-rich repeat protein kinase family protein                                         |
| AT1G24540 | 0.342392561  | 0.455533575 | 0.040455061   | 0.055803261  | cytochrome P450%2C family 86%2C subfamily C%2C polypeptide 1                              |
| AT1G30220 | 0.329840184  | 0.484550851 | 0.032433164   | 0.063466802  | inositol transporter 2                                                                    |
| AT3G06360 | 0.327111646  | 0.843400438 | 0.021055476   | 0.392811287  | arabinogalactan protein 27                                                                |
| AT1G09917 | 0.318742683  | 0.749594664 | 0.042425938   | 0.589120409  | NA                                                                                        |
| AT1G35550 | 0.297300111  | 0.803356238 | 0.044237601   | 0.676100161  | elongation factor Tu C-terminal domain-containing protein                                 |
| AT4G00220 | 0.292309149  | 0.571753811 | 0.022433297   | 0.133248152  | Lateral organ boundaries (LOB) domain family protein                                      |
| AT1G02340 | 0.280246461  | 0.719358995 | 0.038270673   | 0.09731182   | basic helix-loop-helix (bHLH) DNA-binding superfamily protein                             |
| AT1G76230 | 0.276185638  | 1.26147561  | 0.016411409   | 0.48619383   | hypothetical protein                                                                      |
| AT1G48500 | 0.274183814  | 0.503840961 | 0.010948043   | 0.033881049  | jasmonate-zim-domain protein 4                                                            |

|           |             |             |             |             |                                                                                           |
|-----------|-------------|-------------|-------------|-------------|-------------------------------------------------------------------------------------------|
| AT1G29180 | 0.270430438 | 0.836334357 | 0.027321523 | 0.649695175 | Cysteine/Histidine-rich C1 domain family protein                                          |
| AT5G18730 | 0.270274555 | 0.507447931 | 0.037307932 | 0.05385274  | DNAJ heat shock amino-terminal domain protein                                             |
| AT3G30846 | 0.262301287 | 0.677819833 | 0.016214654 | 0.140487317 | NA                                                                                        |
| AT4G10350 | 0.257565754 | 0.586832511 | 0.01564112  | 0.081899696 | NAC domain containing protein 70                                                          |
| AT4G32535 | 0.253776196 | 1.027005904 | 0.01499985  | 0.858746104 | hypothetical protein                                                                      |
| AT1G25112 | 0.248395766 | 1.159831076 | 0.017513988 | 0.745789598 | hypothetical protein                                                                      |
| AT5G61550 | 0.248279157 | 1.011568493 | 0.011858961 | 0.947317992 | U-box domain-containing protein kinase family protein                                     |
| AT4G36770 | 0.231095956 | 0.797487326 | 0.012231327 | 0.361627712 | UDP-Glycosyltransferase superfamily protein                                               |
| AT4G05220 | 0.216319322 | 0.318764253 | 0.007344091 | 0.06032344  | Late embryogenesis abundant (LEA) hydroxyproline-rich glycoprotein family                 |
| AT3G63052 | 0.195706091 | 0.405591915 | 0.043900432 | 0.281889004 | hypothetical protein                                                                      |
| AT1G04150 | 0.188081537 | 1.15476507  | 0.02556114  | 0.818215818 | C2 calcium/lipid-binding plant phosphoribosyltransferase family protein                   |
| AT5G03553 | 0.179951104 | 0.567915282 | 0.025472874 | 0.075417341 | hypothetical protein                                                                      |
| AT1G12100 | 0.167885827 | 0.402622936 | 0.020349221 | 0.05842651  | Bifunctional inhibitor/lipid-transfer protein/seed storage 2S albumin superfamily protein |
| AT3G52820 | 0.13085919  | 0.292728304 | 0.00851157  | 0.129001968 | purple acid phosphatase 22                                                                |
| AT4G22870 | 0.124703116 | 0.513447673 | 0.007233437 | 0.05859262  | 2-oxoglutarate (2OG) and Fe(II)-dependent oxygenase superfamily protein                   |
| AT5G37800 | 0.095960833 | 0.406034262 | 0.010279044 | 0.278684168 | RHD SIX-LIKE 1                                                                            |
| AT4G27250 | 0.095276266 | 0.83780002  | 0.00791291  | 0.753987482 | NAD(P)-binding Rossmann-fold superfamily protein                                          |
| AT4G04225 | 0.091795518 | 5.842917839 | 0.009831069 | 0.32498029  | NA                                                                                        |
| AT5G48130 | 0.09100405  | 0.736695268 | 0.026801079 | 0.606071033 | Phototropic-responsive NPH3 family protein                                                |
| AT4G01760 | 0.078100149 | 1.005296347 | 0.006138864 | 0.989725543 | Cysteine/Histidine-rich C1 domain family protein                                          |
| AT1G18320 | 0.062091395 | 0.728571071 | 0.040290234 | 0.335924473 | Mitochondrial import inner membrane translocase subunit Tim17/Tim22/Tim23 family protein  |
| AT1G73610 | 0.060811947 | 0.319909576 | 0.023062065 | 0.053093687 | GDSL-like Lipase/Acylhydrolase superfamily protein                                        |
| AT1G42924 | 0.052606903 | 0.756119086 | 0.042354826 | 0.513186902 | NA                                                                                        |
| ATMG00310 | 0           | 0.871545378 | 3.47741E-05 | 0.079365125 | RNA-directed DNA polymerase (reverse transcriptase)-related family protein                |
| AT5G07450 | 0           | 0.443436496 | 0.004306774 | 0.174770624 | cyclin p4%3B3                                                                             |
| AT5G52290 | 0           | 1.247742359 | 0.014129334 | 0.315372826 | shortage in chiasmata 1                                                                   |
| AT2G24710 | 0           | 0.55138909  | 0.043531181 | 0.303901162 | glutamate receptor 2.3                                                                    |
| AT4G00416 | 0           | 0.612151723 | 0.047286836 | 0.386604984 | methyl-CPG-binding domain 3                                                               |
| AT3G03275 | 0           | 0.21848497  | 0.049671771 | 0.070309844 | NA                                                                                        |
| AT5G23280 | 0.497765537 | 0.331437835 | 0.03049476  | 0.019962921 | TCP family transcription factor                                                           |
| AT3G19850 | 0.495724604 | 0.341378744 | 0.029420261 | 0.00663218  | Phototropic-responsive NPH3 family protein                                                |
| AT5G02760 | 0.495076066 | 0.343439822 | 0.002128216 | 0.000856476 | Protein phosphatase 2C family protein                                                     |
| AT5G62730 | 0.491622037 | 0.231026579 | 0.04353311  | 0.005513725 | Major facilitator superfamily protein                                                     |
| AT1G49660 | 0.489641628 | 0.36353409  | 0.028582721 | 0.010845606 | carboxyesterase 5                                                                         |
| AT3G15570 | 0.489450188 | 0.321815145 | 0.004373874 | 0.009264119 | Phototropic-responsive NPH3 family protein                                                |
| AT2G43200 | 0.486732592 | 0.436659289 | 0.019348421 | 0.002825971 | S-adenosyl-L-methionine-dependent methyltransferases superfamily protein                  |
| AT1G50280 | 0.478475606 | 0.174600031 | 0.022070145 | 0.009731491 | Phototropic-responsive NPH3 family protein                                                |
| AT2G43445 | 0.478201351 | 0.265057353 | 0.009658399 | 0.001245472 | F-box and associated interaction domains-containing protein                               |
| AT5G20670 | 0.476398884 | 0.307194588 | 0.027254426 | 0.008934133 | DUF1677 family protein (DUF1677)                                                          |
| AT2G02950 | 0.475123318 | 0.298418578 | 0.01037728  | 0.000795313 | phytochrome kinase substrate 1                                                            |

|           |             |             |             |             |                                                                          |
|-----------|-------------|-------------|-------------|-------------|--------------------------------------------------------------------------|
| AT5G11070 | 0.473491816 | 0.320896536 | 0.000915724 | 0.000138741 | hypothetical protein                                                     |
| AT4G19170 | 0.472270864 | 0.342785735 | 0.013397323 | 0.008215879 | nine-cis-epoxycarotenoid dioxygenase 4                                   |
| AT2G36050 | 0.462287596 | 0.328940095 | 0.001292089 | 0.000331245 | ovate family protein 15                                                  |
| AT4G29905 | 0.460615302 | 0.418406854 | 0.000451302 | 0.011595987 | hypothetical protein                                                     |
| AT2G34610 | 0.442716577 | 0.391650811 | 0.033710584 | 0.00126637  | cotton fiber protein                                                     |
| AT5G57180 | 0.440632059 | 0.341363149 | 0.000438574 | 0.000507135 | chloroplast import apparatus 2                                           |
| AT4G34770 | 0.435711944 | 0.136045001 | 0.00060503  | 0.001121039 | SAUR-like auxin-responsive protein family                                |
| AT4G34950 | 0.434120781 | 0.257812829 | 0.047051244 | 0.028636381 | Major facilitator superfamily protein                                    |
| AT4G22495 | 0.430107083 | 0.196657802 | 0.025496416 | 0.007287442 | hypothetical protein                                                     |
| AT5G44680 | 0.429835671 | 0.217736587 | 0.008646043 | 0.010080032 | DNA glycosylase superfamily protein                                      |
| AT5G64190 | 0.426407316 | 0.491367812 | 0.000774755 | 0.045857798 | neuronal PAS domain protein                                              |
| AT1G15550 | 0.4240502   | 0.271551899 | 0.030908371 | 0.016867643 | gibberellin 3-oxidase 1                                                  |
| AT4G34790 | 0.415676082 | 0.268172728 | 0.027985571 | 0.018569801 | SAUR-like auxin-responsive protein family                                |
| AT3G30180 | 0.412192578 | 0.272184156 | 0.030927269 | 0.011923834 | brassinosteroid-6-oxidase 2                                              |
| AT2G36540 | 0.409122579 | 0.147556897 | 0.038804725 | 0.009144942 | Haloacid dehalogenase-like hydrolase (HAD) superfamily protein           |
| AT2G18300 | 0.370946404 | 0.214536175 | 0.001127066 | 0.000154682 | basic helix-loop-helix (bHLH) DNA-binding superfamily protein            |
| AT2G34010 | 0.34878133  | 0.186056347 | 0.003942927 | 0.003520066 | verprolin                                                                |
| AT4G06536 | 0.345044799 | 0.495874052 | 0.031646712 | 0.040131723 | SPla/Ryanodine receptor (SPRY) domain-containing protein                 |
| AT2G05914 | 0.316712384 | 0.183781705 | 0.02101514  | 0.009542524 | NA                                                                       |
| AT4G30230 | 0.302534564 | 0.306612036 | 0.03275481  | 0.033801411 | hypothetical protein                                                     |
| AT2G47670 | 0.293962274 | 0.327366626 | 0.031483265 | 0.047744694 | Plant invertase/pectin methylesterase inhibitor superfamily protein      |
| AT4G05690 | 0.292387408 | 0.316119154 | 0.032080843 | 0.038677385 | NA                                                                       |
| AT1G61230 | 0.289815529 | 0.258817788 | 0.030957579 | 0.021844597 | Mannose-binding lectin superfamily protein                               |
| AT4G38860 | 0.289364668 | 0.07427432  | 0.019868999 | 0.013427986 | SAUR-like auxin-responsive protein family                                |
| AT2G35075 | 0.260376591 | 0.210309912 | 0.037942912 | 0.02793648  | hypothetical protein                                                     |
| AT5G39680 | 0.236407001 | 0.342727111 | 0.00290212  | 0.002333114 | Pentatricopeptide repeat (PPR) superfamily protein                       |
| AT4G18980 | 0.206090381 | 0.352198825 | 0.026844824 | 0.047735412 | AtS40-3                                                                  |
| AT2G39920 | 0.152484599 | 0.197808708 | 0.013449886 | 0.005247717 | HAD superfamily%2C subfamily IIIB acid phosphatase                       |
| AT5G01880 | 0.14085306  | 0.313037925 | 0.009951476 | 0.010207102 | RING/U-box superfamily protein                                           |
| AT2G09510 | 0.091997475 | 0.459003636 | 0.003237355 | 0.018466165 | NA                                                                       |
| AT1G80340 | 0           | 0           | 0.036282031 | 0.036282031 | gibberellin 3-oxidase 2                                                  |
| AT3G28360 | 0           | 0           | 0.019681439 | 0.019681439 | P-glycoprotein 16                                                        |
| AT5G32107 | 0           | 0.124173055 | 0.014117527 | 0.007151442 | NA                                                                       |
| AT2G31930 | 0           | 0.148476355 | 0.021543829 | 0.015534725 | hypothetical protein                                                     |
| AT1G80760 | 0.651983245 | 0.499453254 | 0.059283889 | 0.040562269 | NOD26-like intrinsic protein 6%3B1                                       |
| AT1G70940 | 0.763764216 | 0.499105583 | 0.1188232   | 0.023728145 | Auxin efflux carrier family protein                                      |
| AT5G08150 | 0.584660863 | 0.498714777 | 0.041392775 | 0.000969843 | suppressor of phytochrome b 5                                            |
| AT2G03750 | 0.769867558 | 0.497181349 | 0.076111058 | 0.006705614 | P-loop containing nucleoside triphosphate hydrolases superfamily protein |
| AT2G36026 | 0.890445139 | 0.496435549 | 0.773979645 | 0.026407148 | Ovate family protein                                                     |
| AT5G56860 | 0.61309678  | 0.496331229 | 0.00399416  | 0.006054983 | GATA type zinc finger transcription factor family protein                |

|           |             |             |             |             |                                                                               |
|-----------|-------------|-------------|-------------|-------------|-------------------------------------------------------------------------------|
| AT2G01940 | 0.752527147 | 0.49603851  | 0.042151132 | 0.010830595 | C2H2-like zinc finger protein                                                 |
| AT5G48880 | 0.622781705 | 0.495224589 | 0.090135816 | 0.044573734 | peroxisomal 3-keto-acyl-CoA thiolase 2                                        |
| AT2G39250 | 1.001107806 | 0.494180698 | 0.996121292 | 0.03745595  | Integrase-type DNA-binding superfamily protein                                |
| AT1G68550 | 0.784100953 | 0.493980976 | 0.054716074 | 0.004448296 | Integrase-type DNA-binding superfamily protein                                |
| AT4G09350 | 0.709442394 | 0.493903171 | 0.132313112 | 0.034447439 | Chaperone DnaJ-domain superfamily protein                                     |
| AT4G36240 | 0.608029847 | 0.493668722 | 0.022823735 | 0.033943854 | GATA transcription factor 7                                                   |
| AT5G51670 | 0.601751353 | 0.492236739 | 0.012423293 | 0.006442415 | hypothetical protein (DUF668)                                                 |
| AT1G60010 | 0.764333414 | 0.492119653 | 0.119071462 | 0.022507203 | D-ribose-binding periplasmic protein                                          |
| AT1G06180 | 0.672761537 | 0.491711025 | 0.035422321 | 0.007366828 | myb domain protein 13                                                         |
| AT3G16330 | 0.935939685 | 0.491369475 | 0.733546752 | 0.01638888  | Avr9/Cf-9 rapidly elicited protein                                            |
| AT1G24330 | 0.816207882 | 0.491049668 | 0.119478698 | 0.010916303 | ARM repeat superfamily protein                                                |
| AT3G55110 | 0.789886501 | 0.49080408  | 0.21728858  | 0.039519532 | ABC-2 type transporter family protein                                         |
| AT3G16560 | 0.577947649 | 0.490627135 | 0.016384668 | 0.008561219 | Protein phosphatase 2C family protein                                         |
| AT5G07670 | 0.65034771  | 0.489222986 | 0.034383218 | 0.002335382 | RNI-like superfamily protein                                                  |
| AT5G47610 | 0.677850392 | 0.48900916  | 0.097819714 | 0.035847863 | RING/U-box superfamily protein                                                |
| AT1G77850 | 0.686662359 | 0.487611917 | 0.062045769 | 0.01254222  | auxin response factor 17                                                      |
| AT3G25717 | 0.760474582 | 0.487155251 | 0.169939169 | 0.012990682 | ROTUNDIFOLIA like 16                                                          |
| AT4G31730 | 0.580196552 | 0.487122473 | 0.029912894 | 0.032708304 | glutamine dumper 1                                                            |
| AT5G28300 | 0.714943928 | 0.486820562 | 0.027053401 | 0.005212914 | Duplicated homeodomain-like superfamily protein                               |
| AT2G15050 | 0.850159466 | 0.486764033 | 0.286153338 | 0.021480244 | lipid transfer protein                                                        |
| AT5G46690 | 0.657975486 | 0.486709964 | 0.079094543 | 0.027426672 | beta HLH protein 71                                                           |
| AT5G53210 | 0.691914354 | 0.486485976 | 0.071392672 | 0.016627032 | basic helix-loop-helix (bHLH) DNA-binding superfamily protein                 |
| AT2G40900 | 0.522831678 | 0.486095448 | 0.014013562 | 0.047579506 | nodulin MtN21 /EamA-like transporter family protein                           |
| AT1G02380 | 0.847477549 | 0.485935754 | 0.511143359 | 0.001213255 | transmembrane protein                                                         |
| AT1G21920 | 0.633312454 | 0.485740708 | 0.00194443  | 0.022458169 | Histone H3 K4-specific methyltransferase SET7/9 family protein                |
| AT5G55620 | 0.625448244 | 0.485629341 | 0.06892843  | 0.036917094 | hypothetical protein                                                          |
| AT5G28030 | 0.785108716 | 0.485251473 | 0.252894273 | 0.039802192 | L-cysteine desulfhydrase 1                                                    |
| AT1G21460 | 0.615150361 | 0.485245281 | 0.068192314 | 0.029133956 | Nodulin MtN3 family protein                                                   |
| AT2G41990 | 0.684906583 | 0.48501704  | 0.103210303 | 0.040381877 | late embryogenesis abundant protein                                           |
| AT1G16500 | 0.887101499 | 0.484897254 | 0.455345977 | 0.028209957 | filamentous hemagglutinin transporter                                         |
| AT1G65620 | 0.601806964 | 0.48452338  | 0.079532091 | 0.019726587 | Lateral organ boundaries (LOB) domain family protein                          |
| AT3G01350 | 0.736345255 | 0.484112811 | 0.292793766 | 0.039282381 | Major facilitator superfamily protein                                         |
| AT1G53890 | 0.483598326 | 0.484036462 | 0.159279398 | 0.039645233 | LURP-one-like protein (DUF567)                                                |
| AT1G53870 | 0.48360408  | 0.484035974 | 0.159314591 | 0.03971528  | LURP-one-like protein (DUF567)                                                |
| AT2G34490 | 0.797214051 | 0.484004386 | 0.184704926 | 0.026521365 | cytochrome P450%2C family 710%2C subfamily A%2C polypeptide 2                 |
| AT1G52880 | 0.620744571 | 0.483989011 | 0.005223977 | 0.001461425 | NAC (No Apical Meristem) domain transcriptional regulator superfamily protein |
| AT5G54630 | 0.618569073 | 0.483808613 | 0.00555657  | 0.007287262 | zinc finger protein-like protein                                              |
| AT3G02380 | 0.748441097 | 0.483762734 | 0.065473606 | 0.005706203 | CONSTANS-like 2                                                               |
| AT3G42800 | 0.823937851 | 0.483666988 | 0.319265322 | 0.02985751  | AF-like protein                                                               |
| AT5G22930 | 0.777746916 | 0.483213088 | 0.140044627 | 0.009997139 | enabled-like protein (DUF1635)                                                |

|           |             |             |             |             |                                                                          |
|-----------|-------------|-------------|-------------|-------------|--------------------------------------------------------------------------|
| AT3G53380 | 0.590145792 | 0.482010578 | 0.012136073 | 0.00773279  | Concanavalin A-like lectin protein kinase family protein                 |
| AT1G75460 | 0.70051197  | 0.481941443 | 0.030788408 | 0.006601262 | ATP-dependent protease La (LON) domain protein                           |
| AT1G78995 | 0.740590664 | 0.48174517  | 0.172162291 | 0.013681409 | hypothetical protein                                                     |
| AT5G06530 | 0.575716994 | 0.481417736 | 0.023752133 | 0.01491342  | ABC-2 type transporter family protein                                    |
| AT5G51550 | 0.623879161 | 0.480562927 | 0.01258506  | 0.010168242 | EXORDIUM like 3                                                          |
| AT5G48730 | 0.708744956 | 0.480375953 | 0.019381666 | 0.00468369  | Pentatricopeptide repeat (PPR) superfamily protein                       |
| AT3G06770 | 0.625304698 | 0.479672988 | 0.044407154 | 0.01544589  | Pectin lyase-like superfamily protein                                    |
| AT5G50160 | 0.725832473 | 0.479559023 | 0.069305838 | 0.024009096 | ferric reduction oxidase 8                                               |
| AT5G26200 | 0.620713261 | 0.479069725 | 0.026630915 | 0.009712404 | Mitochondrial substrate carrier family protein                           |
| AT5G24570 | 0.710976203 | 0.478837796 | 0.051437501 | 0.001605324 | hypothetical protein                                                     |
| AT3G48360 | 0.607879406 | 0.478825477 | 0.026932222 | 0.008608505 | BTB and TAZ domain protein 2                                             |
| AT1G01030 | 0.754502583 | 0.478666856 | 0.057027617 | 0.006441873 | AP2/B3-like transcriptional factor family protein                        |
| AT1G26600 | 0.500064497 | 0.478640628 | 0.032335345 | 0.038672246 | CLAVATA3/ESR-RELATED 9                                                   |
| AT4G28780 | 0.753548839 | 0.478564242 | 0.157973327 | 0.018727477 | GDSL-like Lipase/Acylhydrolase superfamily protein                       |
| AT3G47500 | 0.65583946  | 0.478258356 | 0.001175577 | 0.000583271 | cycling DOF factor 3                                                     |
| AT2G44230 | 0.723903475 | 0.477710411 | 0.02717041  | 0.002986536 | hypothetical protein (DUF946)                                            |
| AT1G11150 | 0.686090664 | 0.477667032 | 0.024112711 | 0.011476357 | NA                                                                       |
| AT5G06250 | 0.836101494 | 0.477597804 | 0.508523733 | 0.041695239 | AP2/B3-like transcriptional factor family protein                        |
| AT3G14330 | 0.701874512 | 0.476787816 | 0.033961892 | 0.016736131 | Tetratricopeptide repeat (TPR)-like superfamily protein                  |
| AT5G14350 | 0.881633719 | 0.476441155 | 0.461383346 | 0.005317495 | Pentatricopeptide repeat (PPR) superfamily protein                       |
| AT3G49670 | 0.567684885 | 0.476438367 | 0.004518116 | 0.002576042 | Leucine-rich receptor-like protein kinase family protein                 |
| AT1G68530 | 0.65438422  | 0.47592263  | 0.000487198 | 0.000142564 | 3-ketoacyl-CoA synthase 6                                                |
| AT2G18560 | 0.551882372 | 0.4759062   | 0.012100158 | 0.007377346 | UDP-Glycosyltransferase superfamily protein                              |
| AT1G18100 | 1.020990248 | 0.47586877  | 0.95042437  | 0.012082212 | PEBP (phosphatidylethanolamine-binding protein) family protein           |
| AT3G09275 | 0.608154931 | 0.475171178 | 0.09597226  | 0.029836726 | NA                                                                       |
| AT5G06790 | 0.854803493 | 0.474028152 | 0.476210992 | 0.008059163 | cotton fiber protein                                                     |
| AT3G61950 | 0.685543376 | 0.473962978 | 0.383048053 | 0.047818527 | basic helix-loop-helix (bHLH) DNA-binding superfamily protein            |
| AT5G03120 | 0.840565351 | 0.473895253 | 0.221797926 | 0.016458544 | transmembrane protein                                                    |
| AT5G39080 | 0.825977162 | 0.473558153 | 0.018869599 | 0.000149168 | HXXXD-type acyl-transferase family protein                               |
| AT2G17230 | 0.644999246 | 0.472590823 | 0.007050294 | 0.000329677 | EXORDIUM like 5                                                          |
| AT3G45260 | 0.906752241 | 0.471982595 | 0.261875218 | 0.003246872 | C2H2-like zinc finger protein                                            |
| AT5G64620 | 0.671244134 | 0.471828637 | 0.068428228 | 0.018226662 | cell wall / vacuolar inhibitor of fructosidase 2                         |
| AT4G13770 | 0.708924962 | 0.471616227 | 0.166995653 | 0.041744645 | cytochrome P450%2C family 83%2C subfamily A%2C polypeptide 1             |
| AT2G28410 | 0.670112068 | 0.471144018 | 0.102680445 | 0.033827617 | transmembrane protein                                                    |
| AT3G11410 | 0.684737096 | 0.470270388 | 0.023280071 | 0.001585291 | protein phosphatase 2CA                                                  |
| AT3G49650 | 0.588815902 | 0.469121275 | 0.032754233 | 0.000737719 | P-loop containing nucleoside triphosphate hydrolases superfamily protein |
| AT2G03310 | 0.630526591 | 0.469106185 | 0.003074642 | 0.000831559 | transmembrane protein                                                    |
| AT4G29140 | 0.680202528 | 0.467821022 | 0.030850617 | 0.005032651 | MATE efflux family protein                                               |
| AT1G13250 | 0.673620229 | 0.467577513 | 0.098368866 | 0.037766311 | galacturonosyltransferase-like 3                                         |
| AT3G10570 | 0.540675454 | 0.467577252 | 0.026453466 | 0.021776928 | cytochrome P450%2C family 77%2C subfamily A%2C polypeptide 6             |

|           |             |             |             |             |                                                                                             |
|-----------|-------------|-------------|-------------|-------------|---------------------------------------------------------------------------------------------|
| AT2G29970 | 0.618128746 | 0.466391704 | 0.001452359 | 0.000232737 | Double Clp-N motif-containing P-loop nucleoside triphosphate hydrolases superfamily protein |
| AT1G05560 | 0.782277071 | 0.466207035 | 0.194731193 | 0.000572158 | UDP-glucosyltransferase 75B1                                                                |
| AT3G50700 | 0.53156678  | 0.466068209 | 0.002279558 | 0.001404562 | indeterminate(ID)-domain 2                                                                  |
| AT3G59400 | 0.71389736  | 0.465535937 | 0.000599316 | 0.003050427 | protein GENOMES UNCOUPLED 4                                                                 |
| AT3G61750 | 0.727620727 | 0.465445804 | 0.147508682 | 0.024766417 | Cytochrome b561/ferric reductase transmembrane with DOMON related domain-containing protein |
| AT1G05562 | 0.783009137 | 0.465214799 | 0.195720903 | 0.000435687 | NA                                                                                          |
| AT1G29195 | 0.914837504 | 0.465110594 | 0.576561841 | 0.029454918 | phosphatidylinositol 4-phosphate 5-kinase MSS4-like protein                                 |
| AT5G16560 | 0.560869266 | 0.465035281 | 0.001920843 | 0.001050967 | Homeodomain-like superfamily protein                                                        |
| AT3G14760 | 0.552026335 | 0.464589066 | 0.062734948 | 0.037163443 | transmembrane protein                                                                       |
| AT4G27410 | 0.667487931 | 0.463385686 | 0.033291253 | 0.007903711 | NAC (No Apical Meristem) domain transcriptional regulator superfamily protein               |
| AT3G06145 | 0.811613976 | 0.462480012 | 0.258881913 | 0.022446804 | RING zinc finger protein                                                                    |
| AT1G62975 | 0.957650158 | 0.462356343 | 0.567678526 | 0.002290378 | basic helix-loop-helix (bHLH) DNA-binding superfamily protein                               |
| AT1G25440 | 0.753604008 | 0.462133417 | 0.111061388 | 0.021512232 | B-box type zinc finger protein with CCT domain-containing protein                           |
| AT3G10525 | 0.600788303 | 0.462127276 | 0.014520421 | 0.005892812 | LOSS OF GIANT CELLS FROM ORGANS                                                             |
| AT1G50270 | 0.617661224 | 0.460835227 | 0.082201882 | 0.045888394 | Pentatricopeptide repeat (PPR) superfamily protein                                          |
| AT4G28690 | 0.65156034  | 0.460583537 | 0.048901739 | 0.024802988 | hypothetical protein                                                                        |
| AT1G62520 | 0.691474177 | 0.460318979 | 0.023580332 | 0.008392761 | sulfated surface-like glycoprotein                                                          |
| AT5G63450 | 0.643693989 | 0.460286947 | 0.122021245 | 0.014509477 | cytochrome P450%2C family 94%2C subfamily B%2C polypeptide 1                                |
| AT1G07720 | 0.539206651 | 0.460160497 | 0.0304809   | 0.018538824 | 3-ketoacyl-CoA synthase 3                                                                   |
| AT3G22104 | 0.680932714 | 0.459538854 | 0.037462949 | 0.000759292 | Phototropic-responsive NPH3 family protein                                                  |
| AT5G19970 | 0.643225113 | 0.459456105 | 0.017827974 | 0.030455108 | GRAS family transcription factor family protein                                             |
| AT3G46550 | 0.829555948 | 0.459450963 | 0.177757978 | 0.022710677 | Fasciclin-like arabinogalactan family protein                                               |
| AT1G05690 | 0.591121748 | 0.458440552 | 0.066090451 | 0.027671817 | BTB and TAZ domain protein 3                                                                |
| AT3G61590 | 0.732754637 | 0.458361839 | 0.091357624 | 0.007738512 | Galactose oxidase/kelch repeat superfamily protein                                          |
| AT2G42280 | 0.650804893 | 0.45803084  | 0.00725638  | 0.011352717 | basic helix-loop-helix (bHLH) DNA-binding superfamily protein                               |
| AT3G25640 | 0.954039283 | 0.456269267 | 0.850814778 | 0.008137069 | MIZU-KUSSEI-like protein (Protein of unknown function%2C DUF617)                            |
| AT2G23430 | 0.843640538 | 0.455590899 | 0.45394598  | 0.00931459  | Cyclin-dependent kinase inhibitor family protein                                            |
| AT5G19190 | 0.570093826 | 0.455179879 | 0.001896414 | 0.004121625 | hypothetical protein                                                                        |
| AT2G45560 | 0.677829827 | 0.455056253 | 0.04524079  | 0.007990652 | cytochrome P450%2C family 76%2C subfamily C%2C polypeptide 1                                |
| AT3G11090 | 0.676080432 | 0.454871079 | 0.006310936 | 0.000454738 | LOB domain-containing protein 21                                                            |
| AT1G73210 | 0.749654233 | 0.452417406 | 0.109557399 | 0.016772612 | hypothetical protein (DUF789)                                                               |
| AT2G40330 | 0.786773069 | 0.452265323 | 0.143341111 | 0.002094065 | PYR1-like 6                                                                                 |
| AT4G01410 | 0.770982448 | 0.450382088 | 0.005728967 | 0.000567671 | Late embryogenesis abundant (LEA) hydroxyproline-rich glycoprotein family                   |
| AT5G35777 | 0.53362768  | 0.450092692 | 0.006505684 | 0.005173242 | NA                                                                                          |
| AT4G21510 | 0.661991141 | 0.449943471 | 0.109682555 | 0.032596669 | F-box family protein                                                                        |
| AT2G43340 | 0.796890322 | 0.449844904 | 0.286965493 | 0.005582183 | hypothetical protein (DUF1685)                                                              |
| AT1G79770 | 0.69840011  | 0.447894859 | 0.130997082 | 0.025998025 | CASP-like protein (DUF1677)                                                                 |
| AT1G72180 | 0.533675594 | 0.447572308 | 0.011923073 | 0.002934087 | Leucine-rich receptor-like protein kinase family protein                                    |
| AT4G18830 | 0.644246741 | 0.447448966 | 0.092953921 | 0.000685111 | ovate family protein 5                                                                      |
| AT3G25590 | 0.744308512 | 0.447076261 | 0.129957643 | 0.022250671 | micronuclear linker histone polyprotein-like protein                                        |

|           |             |             |             |             |                                                                                                               |
|-----------|-------------|-------------|-------------|-------------|---------------------------------------------------------------------------------------------------------------|
| AT1G75580 | 0.706413043 | 0.447016777 | 0.020843792 | 0.019376265 | SAUR-like auxin-responsive protein family                                                                     |
| AT1G74090 | 0.758520037 | 0.446241437 | 0.116923168 | 0.015611325 | desulfo-glucosinolate sulfotransferase 18                                                                     |
| AT1G23205 | 0.774141198 | 0.445818869 | 0.038882517 | 0.002265802 | Plant invertase/pectin methylesterase inhibitor superfamily protein                                           |
| AT1G70230 | 0.615339381 | 0.445685772 | 0.042156282 | 0.022442505 | TRICHOME BIREFRINGENCE-LIKE 27                                                                                |
| AT1G34245 | 0.573288571 | 0.445292055 | 0.050868552 | 0.021072036 | Putative membrane lipoprotein                                                                                 |
| AT3G50750 | 0.61288963  | 0.44527053  | 0.086108565 | 0.031071379 | BES1/BZR1 homolog 1                                                                                           |
| AT2G42870 | 0.607245931 | 0.444908473 | 0.046480194 | 0.0254945   | phy rapidly regulated 1                                                                                       |
| AT3G07350 | 0.629808009 | 0.444577424 | 0.001829173 | 0.001614127 | sulfate/thiosulfate import ATP-binding protein%2C putative (DUF506)                                           |
| AT1G66950 | 0.438032813 | 0.44456135  | 0.220555385 | 0.036626728 | pleiotropic drug resistance 11                                                                                |
| AT2G04560 | 0.86411195  | 0.4428723   | 0.400637846 | 0.025221561 | transferases%2C transferring glycosyl groups                                                                  |
| AT4G33666 | 0.808824492 | 0.441545921 | 0.117099806 | 0.003226887 | hypothetical protein                                                                                          |
| AT3G53690 | 0.71968398  | 0.440673479 | 0.572788888 | 0.035861249 | RING/U-box superfamily protein                                                                                |
| AT1G21260 | 0.875122606 | 0.440475009 | 0.51580562  | 0.001394926 | NA                                                                                                            |
| AT1G15260 | 0.769656954 | 0.440285935 | 0.201463974 | 0.025934626 | LOW protein: ATP-dependent RNA helicase-like protein                                                          |
| AT2G29170 | 0.752648844 | 0.43873452  | 0.216013765 | 0.049649906 | NAD(P)-binding Rossmann-fold superfamily protein                                                              |
| AT5G25190 | 0.829510225 | 0.43838124  | 0.087412748 | 0.00401506  | Integrase-type DNA-binding superfamily protein                                                                |
| AT5G07640 | 1.042439069 | 0.438195855 | 0.922391342 | 0.0156773   | RING/U-box superfamily protein                                                                                |
| AT3G58120 | 0.739258041 | 0.437086859 | 0.050967828 | 0.00407737  | Basic-leucine zipper (bZIP) transcription factor family protein                                               |
| AT5G03615 | 0.491345746 | 0.436282673 | 0.064383522 | 0.043528242 | NA                                                                                                            |
| AT4G35270 | 0.683412477 | 0.43604931  | 0.05202086  | 0.003033125 | Plant regulator RWP-RK family protein                                                                         |
| AT1G79900 | 1.264966683 | 0.434792176 | 0.609102244 | 0.048741257 | Mitochondrial substrate carrier family protein                                                                |
| AT2G19980 | 0.771858691 | 0.433311389 | 0.484600635 | 0.01363918  | CAP (Cysteine-rich secretory proteins%2C Antigen 5%2C and Pathogenesis-related 1 protein) superfamily protein |
| AT4G22730 | 0.529454052 | 0.432172607 | 0.000300228 | 0.004085092 | Leucine-rich repeat protein kinase family protein                                                             |
| AT4G19380 | 0.507465738 | 0.432160173 | 0.013477435 | 8.85064E-06 | Long-chain fatty alcohol dehydrogenase family protein                                                         |
| AT1G54820 | 0.607474154 | 0.431413178 | 0.095113007 | 0.037799385 | Protein kinase superfamily protein                                                                            |
| AT2G42380 | 0.613387102 | 0.430773588 | 0.021692652 | 0.004787921 | Basic-leucine zipper (bZIP) transcription factor family protein                                               |
| AT5G20790 | 1.051452075 | 0.430736658 | 0.794237997 | 0.036865951 | transmembrane protein                                                                                         |
| AT3G06070 | 0.607032844 | 0.43065736  | 0.01030659  | 0.001369365 | hypothetical protein                                                                                          |
| AT2G38995 | 0.867501922 | 0.430562495 | 0.181628632 | 0.0241874   | O-acyltransferase (WSD1-like) family protein                                                                  |
| AT5G51030 | 0.8930725   | 0.4303456   | 0.603958171 | 0.012624685 | NAD(P)-binding Rossmann-fold superfamily protein                                                              |
| AT1G75770 | 0.730063146 | 0.430277833 | 0.314826542 | 0.038096964 | hypothetical protein                                                                                          |
| AT5G65660 | 0.612420705 | 0.428725497 | 0.010432375 | 0.000939755 | hydroxyproline-rich glycoprotein family protein                                                               |
| AT1G18350 | 0.605202781 | 0.428207318 | 0.08596536  | 0.01725477  | MAP kinase kinase 7                                                                                           |
| AT1G73830 | 0.627964461 | 0.427549092 | 0.002033638 | 0.010057701 | BR enhanced expression 3                                                                                      |
| AT3G18550 | 0.806157927 | 0.427203681 | 0.367332545 | 0.029281861 | TCP family transcription factor                                                                               |
| AT3G28040 | 0.673193352 | 0.42706162  | 0.01292227  | 0.000586289 | Leucine-rich receptor-like protein kinase family protein                                                      |
| AT5G61455 | 1.776343218 | 0.426918235 | 0.363276694 | 0.025484341 | NA                                                                                                            |
| AT3G61890 | 0.605393101 | 0.426776358 | 0.050270615 | 0.017520478 | homeobox 12                                                                                                   |
| AT5G44190 | 0.615496321 | 0.426608817 | 0.017557302 | 0.00063666  | GOLDEN2-like 2                                                                                                |

|           |             |             |             |             |                                                                                                    |
|-----------|-------------|-------------|-------------|-------------|----------------------------------------------------------------------------------------------------|
| AT5G19200 | 0.648625805 | 0.425952301 | 0.005425691 | 0.003520226 | NAD(P)-binding Rossmann-fold superfamily protein                                                   |
| AT1G45545 | 0.76783172  | 0.425867365 | 0.423963541 | 0.022556178 | WEAK CHLOROPLAST MOVEMENT UNDER BLUE LIGHT-like protein (DUF827)                                   |
| AT1G52990 | 0.909064899 | 0.425837537 | 0.678361627 | 0.015413285 | thioredoxin family protein                                                                         |
| AT5G10310 | 0.808012599 | 0.425528395 | 0.387445093 | 0.030917899 | EPIDERMAL PATTERNING FACTOR-like protein                                                           |
| AT5G25840 | 0.728289645 | 0.425499049 | 0.021579068 | 0.001723454 | DUF1677 family protein (DUF1677)                                                                   |
| AT1G10020 | 0.680958347 | 0.42530039  | 0.027672267 | 0.004052656 | formin-like protein (DUF1005)                                                                      |
| AT3G50630 | 0.736395615 | 0.423092213 | 0.111390645 | 0.025067413 | KIP-related protein 2                                                                              |
| AT1G68130 | 0.754301489 | 0.422949861 | 0.038433017 | 0.002266461 | indeterminate(ID)-domain 14                                                                        |
| AT2G15020 | 0.657468731 | 0.421603807 | 0.072864552 | 0.000841613 | hypothetical protein                                                                               |
| AT3G14810 | 0.542168158 | 0.421299002 | 0.005774165 | 0.00268685  | mechanosensitive channel of small conductance-like 5                                               |
| AT4G16515 | 0.640410679 | 0.420945789 | 0.063316666 | 0.007209612 | root meristem growth factor                                                                        |
| AT1G77760 | 0.547302746 | 0.420848831 | 0.048212929 | 0.043729491 | nitrate reductase 1                                                                                |
| AT5G63195 | 0.547748583 | 0.418012526 | 0.102819675 | 0.022365417 | NA                                                                                                 |
| AT4G03400 | 0.657447295 | 0.417495971 | 0.056581566 | 0.010647491 | Auxin-responsive GH3 family protein                                                                |
| AT4G16563 | 0.633109436 | 0.417165606 | 0.029072307 | 0.011982485 | Eukaryotic aspartyl protease family protein                                                        |
| AT5G43870 | 0.614493495 | 0.416953916 | 0.078690693 | 0.026119694 | auxin canalization protein (DUF828)                                                                |
| AT4G06255 | 0.960332551 | 0.416235782 | 0.961624999 | 0.023702421 | NA                                                                                                 |
| AT5G59920 | 0.628595863 | 0.416080753 | 0.05614232  | 0.021071534 | Cysteine/Histidine-rich C1 domain family protein                                                   |
| AT3G61900 | 0.679921171 | 0.415945517 | 0.047329436 | 0.012390102 | SAUR-like auxin-responsive protein family                                                          |
| AT3G06120 | 0.851984265 | 0.41414869  | 0.546872308 | 0.037277771 | basic helix-loop-helix (bHLH) DNA-binding superfamily protein                                      |
| AT5G54190 | 0.687087736 | 0.414101174 | 0.342569304 | 0.010418984 | protochlorophyllide oxidoreductase A                                                               |
| AT1G11440 | 0.585786397 | 0.413980628 | 0.1004101   | 0.047626076 | hypothetical protein                                                                               |
| AT1G14920 | 0.570547032 | 0.413910238 | 0.002834999 | 7.52872E-05 | GRAS family transcription factor family protein                                                    |
| AT4G35783 | 0.775912999 | 0.413629605 | 0.319505443 | 0.029346799 | ROTUNDIFOLIA like 6                                                                                |
| AT1G26920 | 0.740818983 | 0.413291253 | 0.014214471 | 9.65083E-05 | zinc finger CCHC domain protein                                                                    |
| AT2G41510 | 0.553535848 | 0.413092175 | 0.041706463 | 0.018416949 | cytokinin oxidase/dehydrogenase 1                                                                  |
| AT1G27940 | 0.578297161 | 0.412279523 | 0.04089621  | 0.004286577 | P-glycoprotein 13                                                                                  |
| AT4G25750 | 0.574186952 | 0.412032322 | 0.007199219 | 0.002223676 | ABC-2 type transporter family protein                                                              |
| AT5G43270 | 0.67111093  | 0.410398539 | 0.034653922 | 0.005474609 | squamosa promoter binding protein-like 2                                                           |
| AT2G27770 | 0.712255747 | 0.409390041 | 0.251803029 | 0.041147128 | DUF868 family protein (DUF868)                                                                     |
| AT5G60850 | 0.55755212  | 0.407857179 | 0.05618303  | 0.03203193  | OBF binding protein 4                                                                              |
| AT5G54145 | 0.639633219 | 0.407533344 | 0.046220473 | 0.012865439 | hypothetical protein                                                                               |
| AT1G26761 | 0.660062849 | 0.406175751 | 0.015080263 | 0.006149722 | Arabinanase/levansucrase/invertase                                                                 |
| AT1G65920 | 0.670502527 | 0.405891472 | 0.030149496 | 0.004363294 | Regulator of chromosome condensation (RCC1) family with FYVE zinc finger domain-containing protein |
| AT1G10550 | 0.617951216 | 0.40481795  | 0.006826826 | 0.001477987 | xyloglucan:xyloglucosyl transferase 33                                                             |
| AT5G55570 | 1.190355897 | 0.40473344  | 0.423735083 | 0.015162989 | transmembrane protein                                                                              |
| AT3G08795 | 0.817996073 | 0.404677054 | 0.532947358 | 0.00299252  | NA                                                                                                 |
| AT2G28200 | 0.540883432 | 0.404207894 | 0.081841137 | 0.04186296  | C2H2-type zinc finger family protein                                                               |
| AT2G47440 | 0.693982355 | 0.403486454 | 0.015731188 | 0.000767618 | Tetratricopeptide repeat (TPR)-like superfamily protein                                            |



|           |             |             |             |             |                                                                                       |
|-----------|-------------|-------------|-------------|-------------|---------------------------------------------------------------------------------------|
| AT1G67626 | 0.607767531 | 0.402538633 | 0.415022755 | 0.022252682 | NA                                                                                    |
| AT5G07240 | 0.590146128 | 0.402460688 | 0.017657806 | 0.006803781 | IQ-domain 24                                                                          |
| AT1G49130 | 0.689140583 | 0.402293449 | 0.059951743 | 0.022555746 | B-box type zinc finger protein with CCT domain-containing protein                     |
| AT3G18845 | 0.941061832 | 0.402041452 | 0.785345428 | 0.031246166 | NA                                                                                    |
| AT2G20180 | 0.667007526 | 0.40189122  | 0.059900322 | 0.019726454 | phytochrome interacting factor 3-like 5                                               |
| AT2G05765 | 0.827423431 | 0.400664274 | 0.398607705 | 0.03748123  | NA                                                                                    |
| AT3G49970 | 0.825555118 | 0.395931653 | 0.482678602 | 0.013720725 | Phototropic-responsive NPH3 family protein                                            |
| AT3G45210 | 1.003305757 | 0.393655614 | 0.977806327 | 0.005476274 | transcription initiation factor TFIID subunit (Protein of unknown function%2C DUF584) |
| AT2G25625 | 0.688133446 | 0.392931826 | 0.207930403 | 0.024104306 | histone deacetylase-like protein                                                      |
| AT3G04140 | 0.70702218  | 0.3926539   | 0.001578684 | 9.67288E-05 | Ankyrin repeat family protein                                                         |
| AT5G02650 | 0.898988563 | 0.391560474 | 0.616330896 | 0.01140551  | hypothetical protein                                                                  |
| AT5G15310 | 0.659061553 | 0.389915129 | 0.162037459 | 0.04376636  | myb domain protein 16                                                                 |
| AT5G62100 | 0.68475615  | 0.389809018 | 0.134830397 | 0.033796036 | BCL-2-associated athanogene 2                                                         |
| AT5G61590 | 0.616425198 | 0.389301389 | 0.01088834  | 0.002373546 | Integrase-type DNA-binding superfamily protein                                        |
| AT4G13540 | 0.703604866 | 0.387800391 | 0.100762885 | 0.029353351 | golgin family A protein                                                               |
| AT4G25990 | 0.765429836 | 0.387716375 | 0.401389959 | 0.045815366 | CCT motif family protein                                                              |
| AT5G09930 | 0.599452205 | 0.386755537 | 0.264252233 | 0.040578224 | ABC transporter family protein                                                        |
| AT1G64590 | 1.059262301 | 0.386547188 | 0.847824822 | 0.03571706  | NAD(P)-binding Rossmann-fold superfamily protein                                      |
| AT5G15850 | 0.692112715 | 0.385335625 | 0.036805312 | 0.009096946 | CONSTANS-like 1                                                                       |
| AT4G22560 | 0.67110319  | 0.3840616   | 0.294115398 | 0.038307576 | sulfated surface-like glycoprotein                                                    |
| AT2G23130 | 0.707226118 | 0.381666855 | 0.050675121 | 0.002944456 | arabinogalactan protein 17                                                            |
| AT1G50040 | 0.610671827 | 0.377675226 | 0.049821322 | 0.009452148 | formin-like protein%2C putative (DUF1005)                                             |
| AT5G11060 | 0.579164404 | 0.377447056 | 0.009518607 | 0.006207214 | homeobox protein knotted-1-like 4                                                     |
| AT1G06977 | 0.573999705 | 0.37712362  | 0.078212456 | 0.01979375  | NA                                                                                    |
| AT3G19680 | 0.724281863 | 0.373023194 | 0.023497336 | 0.001765405 | hypothetical protein (DUF1005)                                                        |
| AT1G71970 | 0.672796795 | 0.371044582 | 0.012227365 | 0.001931326 | hypothetical protein                                                                  |
| AT1G60060 | 0.881258721 | 0.370575624 | 0.636437015 | 0.004173628 | Serine/threonine-protein kinase WNK (With No Lysine)-like protein                     |
| AT1G68570 | 0.541432332 | 0.370284803 | 0.009410189 | 0.003436206 | Major facilitator superfamily protein                                                 |
| AT3G08660 | 0.788223896 | 0.370276848 | 0.356090783 | 0.042701711 | Phototropic-responsive NPH3 family protein                                            |
| AT3G48720 | 0.623286164 | 0.369436035 | 0.008504104 | 0.007322094 | HXXXD-type acyl-transferase family protein                                            |
| AT3G02020 | 0.734566905 | 0.368048234 | 0.179754828 | 0.034272612 | aspartate kinase 3                                                                    |
| AT3G07675 | 0.870310755 | 0.367941027 | 0.726365769 | 0.040483624 | NA                                                                                    |
| AT2G40610 | 0.535910245 | 0.367618819 | 0.025091189 | 0.019678613 | expansin A8                                                                           |
| AT3G50570 | 0.594071552 | 0.366176268 | 0.010078058 | 0.006448042 | hydroxyproline-rich glycoprotein family protein                                       |
| AT5G62430 | 0.524920216 | 0.365925792 | 0.012635402 | 0.000826279 | cycling DOF factor 1                                                                  |
| AT1G18400 | 0.516542165 | 0.365786449 | 0.063902347 | 0.03736895  | BR enhanced expression 1                                                              |
| AT5G13180 | 0.548055724 | 0.362318025 | 0.028380539 | 0.005182047 | NAC domain containing protein 83                                                      |
| AT1G64405 | 0.729407245 | 0.359969696 | 0.431613655 | 0.031893088 | hypothetical protein                                                                  |
| AT1G49200 | 0.690632567 | 0.356697719 | 0.136822182 | 0.029837623 | RING/U-box superfamily protein                                                        |
| AT5G04190 | 0.504707897 | 0.356554557 | 0.001970845 | 0.000224507 | phytochrome kinase substrate 4                                                        |

|           |             |             |             |             |                                                                                                               |
|-----------|-------------|-------------|-------------|-------------|---------------------------------------------------------------------------------------------------------------|
| AT4G37540 | 0.806357485 | 0.353780583 | 0.088210493 | 0.001214524 | LOB domain-containing protein 39                                                                              |
| AT2G41940 | 0.536585427 | 0.353328828 | 0.004411122 | 0.000713943 | zinc finger protein 8                                                                                         |
| AT1G26790 | 0.652714261 | 0.35090819  | 0.194082418 | 0.002772141 | Dof-type zinc finger DNA-binding family protein                                                               |
| AT1G75960 | 0.606845125 | 0.3492334   | 0.009656931 | 0.000648482 | AMP-dependent synthetase and ligase family protein                                                            |
| AT3G46760 | 0.676435075 | 0.349127959 | 0.56532217  | 0.045970314 | Protein kinase superfamily protein                                                                            |
| AT1G28000 | 0.66117674  | 0.344966423 | 0.092639824 | 0.009152553 | Pentatricopeptide repeat (PPR) superfamily protein                                                            |
| AT2G14060 | 0.657313436 | 0.343815689 | 0.198193299 | 0.046592128 | S-adenosyl-L-methionine-dependent methyltransferases superfamily protein                                      |
| AT1G18735 | 0.71786676  | 0.343676144 | 0.56037067  | 0.009267934 | NA                                                                                                            |
| AT1G06083 | 0.536595276 | 0.340325421 | 0.085324561 | 0.046914201 | NA                                                                                                            |
| AT1G17960 | 0.70738624  | 0.340008449 | 0.098290298 | 0.003685198 | Threonyl-tRNA synthetase                                                                                      |
| AT2G29090 | 0.573066577 | 0.339131974 | 0.041737426 | 0.000638502 | cytochrome P450%2C family 707%2C subfamily A%2C polypeptide 2                                                 |
| AT2G25220 | 0.880681653 | 0.3340865   | 0.430188888 | 0.007500608 | Protein kinase superfamily protein                                                                            |
| AT3G59940 | 0.549922016 | 0.333345372 | 0.03383491  | 0.010319831 | Galactose oxidase/kelch repeat superfamily protein                                                            |
| AT5G62920 | 0.644970545 | 0.331497731 | 0.019136741 | 0.011228509 | response regulator 6                                                                                          |
| AT4G25780 | 0.515177944 | 0.331022767 | 0.001230803 | 5.53397E-06 | CAP (Cysteine-rich secretory proteins%2C Antigen 5%2C and Pathogenesis-related 1 protein) superfamily protein |
| AT1G52530 | 0.417653494 | 0.330578373 | 0.134284589 | 0.046763037 | Hus1-like protein                                                                                             |
| AT3G57040 | 0.603579482 | 0.329586081 | 0.030502017 | 0.003688428 | response regulator 9                                                                                          |
| AT4G34750 | 0.53878414  | 0.329071131 | 0.026804146 | 0.009512479 | SAUR-like auxin-responsive protein family                                                                     |
| AT1G05990 | 0.537471881 | 0.327803408 | 0.178371686 | 0.017053335 | EF hand calcium-binding protein family                                                                        |
| AT1G76190 | 1.178566284 | 0.325560762 | 0.637190269 | 0.045073843 | SAUR-like auxin-responsive protein family                                                                     |
| AT3G05936 | 0.700860601 | 0.324615362 | 0.185980632 | 0.045921516 | hypothetical protein                                                                                          |
| AT5G49330 | 0.787021587 | 0.324045292 | 0.591493131 | 0.041969656 | myb domain protein 111                                                                                        |
| AT4G15550 | 0.537226809 | 0.323660154 | 0.007557094 | 0.005306507 | indole-3-acetate beta-D-glucosyltransferase                                                                   |
| AT1G68460 | 0.549436142 | 0.322639803 | 0.090903036 | 0.032912399 | isopentenyltransferase 1                                                                                      |
| AT5G25240 | 0.594480369 | 0.322486722 | 0.064874283 | 0.02209452  | stress induced protein                                                                                        |
| AT1G68520 | 0.588052036 | 0.320118199 | 0.021632915 | 0.008738169 | B-box type zinc finger protein with CCT domain-containing protein                                             |
| AT3G50825 | 0.962162511 | 0.314222353 | 0.895484873 | 0.019874557 | NA                                                                                                            |
| AT2G46310 | 0.661003844 | 0.313384267 | 0.041845993 | 0.008348409 | cytokinin response factor 5                                                                                   |
| AT3G51400 | 0.993671292 | 0.312218391 | 0.97412523  | 0.01992032  | hypothetical protein (DUF241)                                                                                 |
| AT4G35720 | 0.65471029  | 0.309449112 | 0.033251511 | 0.004144908 | DUF241 domain protein%2C putative (DUF241)                                                                    |
| AT5G53710 | 0.603101642 | 0.30489449  | 0.370171475 | 0.018615832 | hypothetical protein                                                                                          |
| AT4G19060 | 0.71020695  | 0.30352288  | 0.509093596 | 0.04829805  | P-loop containing nucleoside triphosphate hydrolases superfamily protein                                      |
| AT1G08747 | 1.596811101 | 0.299606993 | 0.620369389 | 0.026724195 | NA                                                                                                            |
| AT5G61570 | 0.640861857 | 0.298769341 | 0.218097609 | 0.016454636 | Protein kinase superfamily protein                                                                            |
| AT5G45820 | 0.50390866  | 0.295172132 | 0.001605499 | 0.001133542 | CBL-interacting protein kinase 20                                                                             |
| AT5G41761 | 0.61519114  | 0.294979703 | 0.002808965 | 2.96666E-05 | hypothetical protein                                                                                          |
| AT5G01740 | 0.514103264 | 0.293579423 | 0.002947651 | 0.000740514 | Nuclear transport factor 2 (NTF2) family protein                                                              |
| AT2G38180 | 0.511545364 | 0.291154682 | 0.004521607 | 0.004487182 | SGNH hydrolase-type esterase superfamily protein                                                              |
| AT3G61840 | 0.867443678 | 0.286294359 | 0.517368347 | 0.03317592  | auxin response factor%2C putative (DUF688)                                                                    |

|           |             |             |             |             |                                                                                             |
|-----------|-------------|-------------|-------------|-------------|---------------------------------------------------------------------------------------------|
| AT1G01520 | 0.368712919 | 0.285859204 | 0.093161783 | 0.009112415 | Homeodomain-like superfamily protein                                                        |
| AT2G35700 | 0.726919426 | 0.284630867 | 0.616061187 | 0.041863488 | ERF family protein 38                                                                       |
| AT2G20875 | 0.611096105 | 0.284074355 | 0.085613781 | 0.004032997 | epidermal patterning factor 1                                                               |
| AT4G38840 | 0.634022554 | 0.278255751 | 0.027046277 | 0.007545898 | SAUR-like auxin-responsive protein family                                                   |
| AT2G07724 | 1.197949582 | 0.277787465 | 0.675020545 | 0.044539246 | hypothetical protein                                                                        |
| AT1G14280 | 0.547540166 | 0.276220203 | 0.00012184  | 0.000956664 | phytochrome kinase substrate 2                                                              |
| AT4G17920 | 0.806053127 | 0.275246331 | 0.340260119 | 0.029600456 | RING/U-box superfamily protein                                                              |
| AT1G68238 | 0.725087602 | 0.274104799 | 0.126648293 | 0.012858188 | transmembrane protein                                                                       |
| AT2G40200 | 0.689352741 | 0.273722271 | 0.064853003 | 0.00502778  | basic helix-loop-helix (bHLH) DNA-binding superfamily protein                               |
| AT3G09160 | 0.99092386  | 0.273452535 | 0.968022023 | 0.005834056 | RNA-binding (RRM/RBD/RNP motifs) family protein                                             |
| AT3G61880 | 0.59102985  | 0.272580471 | 0.028097656 | 0.000791218 | cytochrome p450 78a9                                                                        |
| AT1G09180 | 0.937313729 | 0.272042139 | 0.881270717 | 0.025538448 | secretion-associated RAS super family 1                                                     |
| AT3G11110 | 0.520646291 | 0.263758085 | 0.027777448 | 0.013638062 | RING/U-box superfamily protein                                                              |
| AT1G51440 | 0.786028001 | 0.261780913 | 0.35735935  | 0.011519296 | alpha/beta-Hydrolases superfamily protein                                                   |
| AT3G63088 | 0.408763493 | 0.257054622 | 0.063848586 | 0.02498529  | ROTUNDIFOLIA like 14                                                                        |
| AT5G18020 | 0.885960382 | 0.253215455 | 0.587499152 | 0.022299062 | SAUR-like auxin-responsive protein family                                                   |
| AT2G40130 | 0.583122466 | 0.238665583 | 0.34886714  | 0.047826144 | Double Clp-N motif-containing P-loop nucleoside triphosphate hydrolases superfamily protein |
| AT1G49470 | 0.4489654   | 0.237450789 | 0.06435987  | 0.035034111 | transmembrane epididymal protein (DUF716)                                                   |
| AT5G09805 | 1.053906854 | 0.228869618 | 0.673685004 | 0.005556938 | inflorescence deficient in abscission (IDA)-like 3                                          |
| AT3G09450 | 0.558696323 | 0.228477858 | 0.009211625 | 0.000943891 | fusaric acid resistance family protein                                                      |
| AT3G24065 | 0.81106437  | 0.227709345 | 0.754779075 | 0.033974249 | Plant self-incompatibility protein S1 family                                                |
| AT2G45420 | 0.606760285 | 0.22025623  | 0.376489738 | 0.036047628 | LOB domain-containing protein 18                                                            |
| AT4G38850 | 0.540960279 | 0.219353367 | 0.255158843 | 0.04788332  | SAUR-like auxin-responsive protein family                                                   |
| AT1G05420 | 0.560652624 | 0.217147261 | 0.134401171 | 0.033413975 | ovate family protein 12                                                                     |
| AT1G03987 | 0.992107373 | 0.208270816 | 0.988937423 | 0.018839179 | NA                                                                                          |
| AT2G22460 | 2.420830503 | 0.207024463 | 0.2611161   | 0.049863443 | MIZU-KUSSEI-like protein (Protein of unknown function%2C DUF617)                            |
| AT2G30615 | 0.517625152 | 0.202118105 | 0.226564028 | 0.000208288 | F-box/LRR protein                                                                           |
| AT5G45770 | 0.40636985  | 0.200366465 | 0.14714756  | 0.005955693 | receptor like protein 55                                                                    |
| AT4G28700 | 0.490842052 | 0.199226649 | 0.201274722 | 0.005254983 | ammonium transporter 1%3B4                                                                  |
| AT4G36808 | 0.783121408 | 0.198909589 | 0.171241793 | 0.037283782 | NA                                                                                          |
| AT3G10150 | 0.807957631 | 0.197040873 | 0.662190304 | 0.004069066 | purple acid phosphatase 16                                                                  |
| AT2G37030 | 0.925620213 | 0.188887006 | 0.920879485 | 0.038339097 | SAUR-like auxin-responsive protein family                                                   |
| AT5G28280 | 1.257980441 | 0.184386467 | 0.64952093  | 0.017663674 | NA                                                                                          |
| AT1G22380 | 0.91265634  | 0.183793801 | 0.768298639 | 0.021579393 | UDP-glucosyl transferase 85A3                                                               |
| AT4G34760 | 0.504707401 | 0.171836266 | 0.008480983 | 0.000154677 | SAUR-like auxin-responsive protein family                                                   |
| AT1G18810 | 0.507059603 | 0.170369786 | 0.003835557 | 0.000548342 | phytochrome kinase substrate-like protein                                                   |
| AT4G34530 | 0.65003231  | 0.162451955 | 0.041285342 | 0.034071236 | cryptochrome-interacting basic-helix-loop-helix 1                                           |
| AT3G11810 | 0.626750189 | 0.161779505 | 0.328798469 | 0.018527873 | transmembrane protein                                                                       |
| AT1G26762 | 1.184606679 | 0.147394618 | 0.686148274 | 0.044773724 | transmembrane protein                                                                       |
| AT1G31485 | 0.732138937 | 0.145887848 | 0.752533011 | 0.018682241 | NA                                                                                          |

|           |             |             |             |             |                                                                      |
|-----------|-------------|-------------|-------------|-------------|----------------------------------------------------------------------|
| AT5G25470 | 0.421900511 | 0.143249436 | 0.303791145 | 0.016870095 | AP2/B3-like transcriptional factor family protein                    |
| AT2G43390 | 0.294950058 | 0.117143115 | 0.064356433 | 0.048211633 | hypothetical protein                                                 |
| AT2G30424 | 0.416893138 | 0.108874996 | 0.176200254 | 0.047049349 | Homeodomain-like superfamily protein                                 |
| AT5G06520 | 0.606235753 | 0.104271531 | 0.432085651 | 0.004613974 | SWAP (Suppressor-of-White-APricot)/surp domain-containing protein    |
| AT2G11780 | 0.63623632  | 0.066059792 | 0.135719956 | 0.000659779 | NA                                                                   |
| AT1G30250 | 0.227809325 | 0.058012029 | 0.056839169 | 0.018822531 | hypothetical protein                                                 |
| AT5G04325 | 1.466661375 | 0           | 0.615788933 | 0.021087054 | NA                                                                   |
| AT5G60320 | 2.86075397  | 0           | 0.002723868 | 0.03752019  | Concanavalin A-like lectin protein kinase family protein             |
| AT3G11970 | 0.329964096 | 0           | 0.076611497 | 0.046963644 | NA                                                                   |
| AT1G49370 | 0.845390677 | 0           | 0.872684311 | 0.019249393 | NA                                                                   |
| AT4G28485 | 0.872613676 | 0           | 0.898206352 | 0.023628719 | transmembrane protein%2C putative (DUF679 domain membrane protein 7) |
| AT4G34940 | 0.278660421 | 0           | 0.108293214 | 0.034078252 | armadillo repeat only 1                                              |
| AT1G19640 | 0.581867836 | 0           | 0.550673138 | 0.020024823 | jasmonic acid carboxyl methyltransferase                             |
| AT4G06875 | 0.733775579 | 0           | 0.752638224 | 0.010728739 | NA                                                                   |
| AT3G16160 | 0.331791251 | 0           | 0.181564655 | 5.01538E-05 | Tesmin/TSO1-like CXC domain-containing protein                       |
| AT5G45120 | 0.390236808 | 0           | 0.259256549 | 0.038245525 | Eukaryotic aspartyl protease family protein                          |
| AT4G06517 | 0.58480628  | 0           | 0.369339952 | 0.045509088 | NA                                                                   |
| AT1G49005 | 0.663614052 | 0           | 0.441499214 | 0.013517385 | CLAVATA3/ESR-RELATED 11                                              |
| AT5G09976 | 0.422239117 | 0           | 0.303853323 | 0.003501912 | hypothetical protein                                                 |
| AT1G36590 | 0.323527117 | 0           | 0.07503856  | 0.046969281 | NA                                                                   |
