# Supplementary material for: Cell wall‐derived mixed‐linked β‐1,3/1,4‐glucans trigger immune responses and disease resistance in plants
Source: PubMed Central journal article supplement — Plant J. 2021 Mar 22;106(3):601–15. doi: 10.1111/tpj.15185 (PMC8252745; doi:10.1111/tpj.15185), 2021-03-22
Supplement: TPJ-106-601-s011.pdf [file TPJ-106-601-s011.pdf]

## Supplementary Table S7: MLG43-ectodomains interaction energies.

| Protein-glycan interaction energies                                                                     |                            |                           |                           |                          |                           |                           |                    |
|---------------------------------------------------------------------------------------------------------|----------------------------|---------------------------|---------------------------|--------------------------|---------------------------|---------------------------|--------------------|
| [Molecular Mechanics (MM) with Poisson-Boltzmann (PB) and surface area (SA) solvation MM/PBSA approach] |                            |                           |                           |                          |                           |                           |                    |
| PRR ECD (PDB)                                                                                           | $\Delta E_{\text{elec}}^1$ | $\Delta E_{\text{vdW}}^1$ | $\Delta E_{\text{int}}^2$ | $\Delta G_{\text{np}}^3$ | $\Delta G_{\text{pol}}^4$ | $\Delta G_{\text{sol}}^5$ | $\Sigma^6$         |
| <b>CERK1 (4EBZ)</b>                                                                                     | -15.9 ± 1.6                | -20.5 ± 3.5               | -36.45 ± 1.9              | 0.4 ± 0.1                | 33.1 ± 2.4                | 33.5 ± 2.5                | <b>-2.9 ± 4.4</b>  |
| <b>BAK1 (4MN8.B)</b>                                                                                    | -26.45 ± 1.8               | -16.2 ± 4.1               | -42.75 ± 5.9              | 0.5 ± 0.3                | 45.2 ± 10                 | 45.7 ± 9.8                | <b>2.9 ± 4.0</b>   |
| <b>SOBIR1 (6R1H)</b>                                                                                    | -25.5 ± 3.8                | -20.8 ± 3.8               | -46.35 ± 7.7              | 0.2 ± 0.4                | 43.35 ± 13.2              | 43.5 ± 12.7               | <b>-2.85 ± 4.9</b> |

<sup>1</sup>  $\Delta E_{\text{elec}}$  and  $\Delta E_{\text{vdW}}$  energies (kcal mol<sup>-1</sup>) calculated at the corresponding optimized geometries with the “NAMD energy” tool implemented in VMD 1.9.3.

<sup>2</sup>  $\Delta E_{\text{int}} = \Delta E_{\text{elec}} + \Delta E_{\text{vdW}}$

<sup>3</sup>  $\Delta G_{\text{np}}$  free energies (kcal mol<sup>-1</sup>) estimated from the empirical linear relation to the solvent-accessible surface area (SASA)  $G_{\text{np}} = \gamma(\text{SASA}) + b$ , where the parameter values depend on how the polar contribution to solvation is obtained. Values were  $\gamma = 0.00526 \text{ kcal mol}^{-1} \text{ \AA}^{-2}$  and  $b = 0.918 \text{ kcal mol}^{-1}$ . SASA values were calculated with the SPDBV tool.

<sup>4</sup>  $\Delta G_{\text{pol}}$  free energies (kcal mol<sup>-1</sup>) obtained by solving the Poisson-Boltzmann equation with the PBEQ Solver tool implemented in CHARMM-GUI.

<sup>5</sup>  $\Delta G_{\text{sol}} = \Delta G_{\text{np}} + \Delta G_{\text{pol}}$

<sup>6</sup>  $\Sigma = \Delta E_{\text{int}} + \Delta G_{\text{sol}}$

Energy values under 1kT (k: Boltzmann constant, T: absolute temperature) are considered irrelevant. At normal thermodynamically temperature of 298 K, noisy kT values start below 0.6 kcal/mol.
