# Supplementary material for: Cell wall‐derived mixed‐linked β‐1,3/1,4‐glucans trigger immune responses and disease resistance in plants
Source: PubMed Central journal article supplement — Plant J. 2021 Mar 22;106(3):601–15. doi: 10.1111/tpj.15185 (PMC8252745; doi:10.1111/tpj.15185), 2021-03-22
Supplement: TPJ-106-601-s013.pdf [file TPJ-106-601-s013.pdf]

**Table S6:** Oligonucleotides used in this work.*Arabidopsis thaliana*

| <b>Gene</b>   | <b>AGI locus</b> | <b>Forward oligonucleotide</b> | <b>Reverse oligonucleotide</b> |
|---------------|------------------|--------------------------------|--------------------------------|
| <i>UBQ21</i>  | <i>AT5G25760</i> | GCTCTTATCAAAGGACCTTCGG         | CGAACTTGAGGAGGTTGCAAAG         |
| <i>WRKY53</i> | <i>AT4G23810</i> | CACCAGAGTCAAACCAGCCATTA        | CTTTACCATCATCAAGCCCATCGG       |
| <i>FRK1</i>   | <i>AT2G19190</i> | ATCTTCGCTTGGAGCTTCTC           | TGCAGCGCAAGGACTAGAG            |
| <i>NHL10</i>  | <i>AT2G35980</i> | TTCCTGTCCGTAACCCAAAC           | CCCTCGTAGTAGGCATGAGC           |
| <i>NUDT7</i>  | <i>AT4G12720</i> | TGCTGGTGCTTTGGTCATCA           | CAGTAGGCAGCTTCCACACA           |
| <i>FH4</i>    | <i>AT1G24150</i> | GGCGGAGGAGAAACAGAGTC           | ACCCTTCACGAGCTAAAGCC           |

*Solanum lycopersicum*

| <b>Gene</b>     | <b>AGI locus</b>    | <b>Forward oligonucleotide</b> | <b>Reverse oligonucleotide</b> |
|-----------------|---------------------|--------------------------------|--------------------------------|
| <i>SIUBQ</i>    | <i>LOC543683</i>    | TGCTTCAGCTTTGATGACTGGA         | AATAACAGGAACCAGCAGCGG          |
| <i>SIPT15</i>   | <i>LOC544042</i>    | ATTCGCGATTTCGGCTAGACATGGT      | AGTAGTGCCTTAGCACCTCGCATT       |
| <i>SIWRKY53</i> | <i>LOC101258576</i> | CAACATCGCCAGAGAAACAAG          | GGGTCATTCTCGTCCAAGTC           |
