# Supplementary material for: Cell wall‐derived mixed‐linked β‐1,3/1,4‐glucans trigger immune responses and disease resistance in plants
Source: PubMed Central journal article supplement — Plant J. 2021 Mar 22;106(3):601–15. doi: 10.1111/tpj.15185 (PMC8252745; doi:10.1111/tpj.15185), 2021-03-22
Supplement: TPJ-106-601-s015.pdf [file TPJ-106-601-s015.pdf]

**Table S2:** Genes differentially expressed under treatment with chitohexaose in Col-0 plants

Expression level of the 1988 differentially expressed genes when treating Col-0 plants with chitohexaose and comparing with genes in Col-0 mock treated plants

Up-regulated genes in the treatment. Consideration of n-fold above or equal 2 is taken. Expression in the treatment against 0 expression in Mock is also considered

Down-regulated genes in the treatment. Consideration of n-fold below or equal to 0.5 is taken

| Gene ID   | p-value<br>chitohexaose vs<br>mock | n-fold   | Annotation                                                           |
|-----------|------------------------------------|----------|----------------------------------------------------------------------|
| AT1G55152 | 0.020946998                        | #jDIV/0! | hypothetical protein                                                 |
| AT2G25297 | 0.005389355                        | #jDIV/0! | transmembrane protein                                                |
| AT1G51913 | 0.004167189                        | #jDIV/0! | transmembrane protein                                                |
| AT2G03925 | 0.016757673                        | #jDIV/0! | NA                                                                   |
| AT1G47130 | 0.015914719                        | #jDIV/0! | hypothetical protein                                                 |
| AT1G36640 | 0.044589794                        | #jDIV/0! | transmembrane protein                                                |
| AT3G00970 | 0.015023616                        | #jDIV/0! | NA                                                                   |
| AT2G23270 | 0.012798018                        | #jDIV/0! | transmembrane protein                                                |
| AT3G14225 | 0.036266996                        | #jDIV/0! | GDSL-motif lipase 4                                                  |
| AT5G09876 | 0.008146648                        | #jDIV/0! | hypothetical protein                                                 |
| AT3G48790 | 0.010933684                        | #jDIV/0! | Pyridoxal phosphate (PLP)-dependent transferases superfamily protein |
| AT3G29970 | 0.000233373                        | #jDIV/0! | B12D protein                                                         |
| AT4G28460 | 0.010528806                        | #jDIV/0! | transmembrane protein                                                |
| AT5G27765 | 0.000482836                        | #jDIV/0! | transmembrane protein                                                |
| AT2G25409 | 0.043264950                        | #jDIV/0! | hypothetical protein                                                 |
| AT4G11480 | 0.048054821                        | #jDIV/0! | cysteine-rich RLK (RECEPTOR-like protein kinase) 32                  |
| AT4G30090 | 0.001310668                        | #jDIV/0! | golgin family A protein                                              |
| AT1G42980 | 0.004099803                        | #jDIV/0! | Actin-binding FH2 (formin homology 2) family protein                 |
| AT1G51915 | 0.013450850                        | #jDIV/0! | cryptdin protein-like protein                                        |
| AT4G28420 | 0.044207650                        | #jDIV/0! | Tyrosine transaminase family protein                                 |
| AT4G22030 | 0.000074119                        | #jDIV/0! | F-box protein with a domain protein                                  |
| AT4G11070 | 0.023163678                        | #jDIV/0! | WRKY family transcription factor                                     |
| AT5G45090 | 0.008971470                        | #jDIV/0! | phloem protein 2-A7                                                  |

|           |             |          |                                                                  |
|-----------|-------------|----------|------------------------------------------------------------------|
| AT4G14368 | 0.018710659 | #jDIV/0! | Regulator of chromosome condensation (RCC1) family protein       |
| AT4G23230 | 0.015719544 | #jDIV/0! | cysteine-rich RECEPTOR-like kinase                               |
| AT1G65790 | 0.010162414 | #jDIV/0! | receptor kinase 1                                                |
| AT2G04480 | 0.042431843 | #jDIV/0! | hypothetical protein                                             |
| AT5G52740 | 0.014186634 | #jDIV/0! | Copper transport protein family                                  |
| AT5G16770 | 0.038191590 | #jDIV/0! | myb domain protein 9                                             |
| AT1G09930 | 0.004015611 | #jDIV/0! | oligopeptide transporter 2                                       |
| AT1G11490 | 0.013871418 | #jDIV/0! | zinc finger (C2H2 type) family protein                           |
| AT1G06135 | 0.004451649 | #jDIV/0! | transmembrane protein                                            |
| AT3G60120 | 0.049225915 | #jDIV/0! | beta glucosidase 27                                              |
| AT1G44740 | 0.036006069 | #jDIV/0! | hypothetical protein                                             |
| AT2G25410 | 0.012094147 | #jDIV/0! | RING/U-box superfamily protein                                   |
| AT4G18540 | 0.005764927 | #jDIV/0! | transmembrane protein                                            |
| AT1G20320 | 0.006937933 | #jDIV/0! | Haloacid dehalogenase-like hydrolase (HAD) superfamily protein   |
| AT5G39100 | 0.025545259 | #jDIV/0! | germin-like protein 6                                            |
| AT2G09025 | 0.035803252 | #jDIV/0! | NA                                                               |
| AT2G07648 | 0.043109417 | #jDIV/0! | hypothetical protein                                             |
| AT4G31960 | 0.041396945 | #jDIV/0! | hypothetical protein                                             |
| AT4G17660 | 0.042653553 | #jDIV/0! | Protein kinase superfamily protein                               |
| AT5G22545 | 0.001922228 | #jDIV/0! | hypothetical protein                                             |
| AT3G61390 | 0.018770683 | #jDIV/0! | RING/U-box superfamily protein                                   |
| AT2G20160 | 0.043350800 | #jDIV/0! | E3 ubiquitin ligase SCF complex subunit SKP1/ASK1 family protein |
| AT1G07683 | 0.001181307 | #jDIV/0! | NA                                                               |
| AT5G06490 | 0.022045602 | #jDIV/0! | RING/U-box superfamily protein                                   |
| AT1G32049 | 0.002671134 | #jDIV/0! | NA                                                               |
| AT5G00965 | 0.045168092 | #jDIV/0! | NA                                                               |
| AT2G28270 | 0.000772647 | #jDIV/0! | Cysteine/Histidine-rich C1 domain family protein                 |
| AT1G64820 | 0.007487060 | #jDIV/0! | MATE efflux family protein                                       |
| AT1G76965 | 0.029105540 | #jDIV/0! | hypothetical protein                                             |
| AT2G29100 | 0.021130061 | #jDIV/0! | glutamate receptor 2.9                                           |
| AT3G42792 | 0.022747020 | #jDIV/0! | NA                                                               |
| AT1G22810 | 0.042893841 | #jDIV/0! | Integrase-type DNA-binding superfamily protein                   |
| AT1G22240 | 0.017881351 | #jDIV/0! | pumilio 8                                                        |

|           |             |          |                                                                            |
|-----------|-------------|----------|----------------------------------------------------------------------------|
| AT3G02430 | 0.043108163 | #jDIV/0! | transmembrane protein%2C putative (DUF679)                                 |
| AT2G01379 | 0.013871356 | #jDIV/0! | transmembrane protein                                                      |
| AT3G23123 | 0.038724481 | #jDIV/0! | transmembrane protein                                                      |
| AT5G22380 | 0.005658343 | #jDIV/0! | NAC domain containing protein 90                                           |
| AT1G77860 | 0.034446313 | #jDIV/0! | Rhomboid-related intramembrane serine protease family protein              |
| AT3G17400 | 0.034081277 | #jDIV/0! | F-box family protein                                                       |
| AT4G36280 | 0.014268575 | #jDIV/0! | Histidine kinase-%2C DNA gyrase B-%2C and HSP90-like ATPase family protein |
| AT4G10530 | 0.049524552 | #jDIV/0! | Subtilase family protein                                                   |
| AT1G57650 | 0.037097739 | #jDIV/0! | ATP binding protein                                                        |
| AT2G31920 | 0.035695739 | #jDIV/0! | elongation factor 1-delta%2C putative (DUF936)                             |
| AT4G28340 | 0.000971040 | #jDIV/0! | pyrroline-5-carboxylate reductase                                          |
| AT5G36937 | 0.035692246 | #jDIV/0! | NA                                                                         |
| AT2G05640 | 0.000970783 | #jDIV/0! | NA                                                                         |
| AT5G54206 | 0.000842872 | #jDIV/0! | NA                                                                         |
| AT3G02270 | 0.007606182 | #jDIV/0! | Trimeric LpxA-like enzyme                                                  |
| AT3G28315 | 0.026179123 | #jDIV/0! | NA                                                                         |
| AT2G01040 | 0.035698518 | #jDIV/0! | NA                                                                         |
| AT1G08860 | 0.017007681 | #jDIV/0! | Calcium-dependent phospholipid-binding Copine family protein               |
| AT1G51900 | 0.001485510 | #jDIV/0! | Regulator of Vps4 activity in the MVB pathway protein                      |
| AT1G73510 | 0.033890301 | #jDIV/0! | hypothetical protein                                                       |
| AT2G28920 | 0.000970914 | #jDIV/0! | RING/U-box superfamily protein                                             |
| AT2G32820 | 0.037526967 | #jDIV/0! | Transcription elongation factor (TFIIS) family protein                     |
| AT3G04915 | 0.048500596 | #jDIV/0! | NA                                                                         |
| AT3G26190 | 0.040821553 | #jDIV/0! | cytochrome P450%2C family 71%2C subfamily B%2C polypeptide 21              |
| AT4G04710 | 0.033216146 | #jDIV/0! | calcium-dependent kinase-like protein                                      |
| AT4G08615 | 0.023356837 | #jDIV/0! | NA                                                                         |
| AT4G23882 | 0.024609757 | #jDIV/0! | Heavy metal transport/detoxification superfamily protein                   |
| AT5G05490 | 0.044569681 | #jDIV/0! | Rad21/Rec8-like family protein                                             |
| AT5G26950 | 0.000971023 | #jDIV/0! | AGAMOUS-like 93                                                            |
| AT5G37420 | 0.000724198 | #jDIV/0! | hypothetical protein (DUF577)                                              |
| AT5G37840 | 0.045224352 | #jDIV/0! | plastid movement impaired protein                                          |
| AT5G38250 | 0.012766115 | #jDIV/0! | Protein kinase family protein                                              |
| AT5G50580 | 0.004689880 | #jDIV/0! | SUMO-activating enzyme 1B                                                  |

|           |             |           |                                                                               |
|-----------|-------------|-----------|-------------------------------------------------------------------------------|
| AT5G50680 | 0.004591717 | #jDIV/0!  | SUMO activating enzyme 1B                                                     |
| AT5G56510 | 0.000828440 | #jDIV/0!  | pumilio 12                                                                    |
| AT5G60350 | 0.045291547 | #jDIV/0!  | hypothetical protein                                                          |
| AT1G14540 | 0.001802060 | 885.26453 | Peroxidase superfamily protein                                                |
| AT4G04480 | 0.012252607 | 735.49674 | F-box protein with a domain protein                                           |
| AT3G12910 | 0.003102979 | 733.47002 | NAC (No Apical Meristem) domain transcriptional regulator superfamily protein |
| AT2G37430 | 0.002745650 | 502.63191 | C2H2 and C2HC zinc fingers superfamily protein                                |
| AT5G11140 | 0.006266564 | 484.50718 | phospholipase-like protein (PEARLI 4) family protein                          |
| AT4G11470 | 0.011723607 | 443.851   | cysteine-rich RLK (RECEPTOR-like protein kinase) 31                           |
| AT5G24110 | 0.004562613 | 431.97601 | WRKY DNA-binding protein 30                                                   |
| AT4G11170 | 0.009446723 | 403.91292 | Disease resistance protein (TIR-NBS-LRR class) family                         |
| AT5G47850 | 0.001819234 | 361.29343 | CRINKLY4 related 4                                                            |
| AT1G07160 | 0.002094579 | 312.49388 | Protein phosphatase 2C family protein                                         |
| AT5G05300 | 0.001257866 | 295.29574 | hypothetical protein                                                          |
| AT2G29110 | 0.028757946 | 287.82759 | glutamate receptor 2.8                                                        |
| AT5G56960 | 0.002903190 | 263.45085 | basic helix-loop-helix (bHLH) DNA-binding family protein                      |
| AT2G37810 | 0.030839369 | 245.79547 | Cysteine/Histidine-rich C1 domain family protein                              |
| AT3G29000 | 0.005120540 | 234.57653 | Calcium-binding EF-hand family protein                                        |
| AT5G51465 | 0.002075872 | 230.82311 | hypothetical protein                                                          |
| AT1G26380 | 0.000156871 | 226.60506 | FAD-binding Berberine family protein                                          |
| AT4G35180 | 0.002297646 | 184.27024 | LYS/HIS transporter 7                                                         |
| AT4G31950 | 0.000015853 | 175.85385 | cytochrome P450%2C family 82%2C subfamily C%2C polypeptide 3                  |
| AT1G61560 | 0.034525651 | 166.11484 | Seven transmembrane MLO family protein                                        |
| AT1G43000 | 0.011609024 | 161.07775 | PLATZ transcription factor family protein                                     |
| AT3G02840 | 0.009449225 | 157.21099 | ARM repeat superfamily protein                                                |
| AT5G64905 | 0.017311267 | 154.63427 | elicitor peptide 3 precursor                                                  |
| AT1G53625 | 0.001812148 | 137.66157 | hypothetical protein                                                          |
| AT4G23280 | 0.021596370 | 132.22588 | cysteine-rich RLK (RECEPTOR-like protein kinase) 20                           |
| AT1G66090 | 0.011302748 | 126.7212  | Disease resistance protein (TIR-NBS class)                                    |
| AT4G16820 | 0.023415873 | 118.77314 | alpha/beta-Hydrolases superfamily protein                                     |
| AT2G26560 | 0.030002798 | 117.24908 | phospholipase A 2A                                                            |
| AT1G35210 | 0.001470689 | 116.7959  | hypothetical protein                                                          |
| AT5G11210 | 0.019777052 | 116.39078 | glutamate receptor 2.5                                                        |

|           |             |           |                                                                          |
|-----------|-------------|-----------|--------------------------------------------------------------------------|
| AT1G56060 | 0.011978251 | 115.96912 | cysteine-rich/transmembrane domain protein B                             |
| AT1G05675 | 0.001819420 | 115.72654 | UDP-Glycosyltransferase superfamily protein                              |
| AT1G71520 | 0.012067968 | 108.59976 | Integrase-type DNA-binding superfamily protein                           |
| AT5G45240 | 0.027888036 | 108.34547 | Disease resistance protein (TIR-NBS-LRR class)                           |
| AT1G56250 | 0.004946203 | 104.2091  | phloem protein 2-B14                                                     |
| AT1G01560 | 0.002928214 | 101.16379 | MAP kinase 11                                                            |
| AT1G06983 | 0.002239470 | 97.939597 | NA                                                                       |
| AT5G57220 | 0.002077479 | 96.162009 | cytochrome P450%2C family 81%2C subfamily F%2C polypeptide 2             |
| AT2G04495 | 0.004545872 | 95.051231 | transmembrane protein                                                    |
| AT1G72520 | 0.021779646 | 90.656116 | PLAT/LH2 domain-containing lipoxygenase family protein                   |
| AT1G24140 | 0.002874474 | 89.522317 | Matrixin family protein                                                  |
| AT3G07195 | 0.000676145 | 89.212155 | RPM1-interacting protein 4 (RIN4) family protein                         |
| AT3G48650 | 0.026726786 | 84.572233 | NA                                                                       |
| AT5G22520 | 0.004453300 | 82.573334 | hypothetical protein                                                     |
| AT1G65385 | 0.011619462 | 81.643181 | NA                                                                       |
| AT4G25350 | 0.004409792 | 80.19551  | EXS (ERD1/XPR1/SYG1) family protein                                      |
| AT3G13950 | 0.004969486 | 79.842639 | ankyrin                                                                  |
| AT3G21520 | 0.002536422 | 79.469201 | transmembrane protein%2C putative (DUF679 domain membrane protein 1)     |
| AT4G37290 | 0.023373704 | 77.093438 | transmembrane protein                                                    |
| AT5G37490 | 0.020592610 | 75.515975 | ARM repeat superfamily protein                                           |
| AT5G52760 | 0.001520401 | 74.250025 | Copper transport protein family                                          |
| AT1G56240 | 0.000486860 | 73.55136  | phloem protein 2-B13                                                     |
| AT4G15417 | 0.005111312 | 72.439391 | RNAse II-like 1                                                          |
| AT4G14630 | 0.043610872 | 72.286317 | germin-like protein 9                                                    |
| AT5G42380 | 0.010523980 | 72.169022 | calmodulin like 37                                                       |
| AT2G17040 | 0.002570683 | 71.344318 | NAC domain containing protein 36                                         |
| AT5G66640 | 0.002399616 | 71.19074  | DA1-related protein 3                                                    |
| AT1G69920 | 0.019834292 | 70.824985 | glutathione S-transferase TAU 12                                         |
| AT2G45760 | 0.005446750 | 70.25675  | BON association protein 2                                                |
| AT3G54150 | 0.010903570 | 69.316679 | S-adenosyl-L-methionine-dependent methyltransferases superfamily protein |
| AT1G21120 | 0.017085305 | 67.58775  | O-methyltransferase family protein                                       |
| AT1G13520 | 0.038857425 | 65.814298 | hypothetical protein (DUF1262)                                           |
| AT2G32130 | 0.009091974 | 65.597671 | intracellular protein transporter%2C putative (DUF641)                   |

|           |             |           |                                                                      |
|-----------|-------------|-----------|----------------------------------------------------------------------|
| AT4G03460 | 0.004107508 | 65.434784 | Ankyrin repeat family protein                                        |
| AT1G16150 | 0.030553601 | 62.671336 | wall associated kinase-like 4                                        |
| AT1G53080 | 0.001002326 | 61.747592 | Legume lectin family protein                                         |
| AT5G41750 | 0.001647941 | 61.120032 | Disease resistance protein (TIR-NBS-LRR class) family                |
| AT4G23220 | 0.001421654 | 60.484432 | cysteine-rich RECEPTOR-like kinase                                   |
| AT3G15518 | 0.013574831 | 60.40237  | hypothetical protein                                                 |
| AT1G24145 | 0.003971514 | 60.383369 | transmembrane protein                                                |
| AT5G27420 | 0.006010199 | 60.222507 | carbon/nitrogen insensitive 1                                        |
| AT2G27389 | 0.025211888 | 59.11109  | hypothetical protein                                                 |
| AT1G65484 | 0.019018011 | 58.997655 | transmembrane protein                                                |
| AT4G18195 | 0.004240705 | 57.261626 | purine permease 8                                                    |
| AT5G39670 | 0.000364018 | 57.114119 | Calcium-binding EF-hand family protein                               |
| AT4G14365 | 0.001579922 | 56.789884 | hypothetical protein                                                 |
| AT1G30370 | 0.000390798 | 55.758281 | alpha/beta-Hydrolases superfamily protein                            |
| AT1G50745 | 0.029947374 | 54.873804 | plant mobile domain protein                                          |
| AT1G06137 | 0.016156578 | 54.798684 | transmembrane protein                                                |
| AT1G58420 | 0.005232621 | 53.503491 | Uncharacterized conserved protein UCP031279                          |
| AT4G18250 | 0.004255295 | 53.146098 | receptor Serine/Threonine kinase-like protein                        |
| AT4G20000 | 0.003672569 | 52.961093 | VQ motif-containing protein                                          |
| AT1G50750 | 0.014699884 | 52.050716 | aminotransferase-like%2C mobile domain protein                       |
| AT5G36925 | 0.001484301 | 51.781167 | hypothetical protein                                                 |
| AT4G11890 | 0.009485622 | 51.167661 | Protein kinase superfamily protein                                   |
| AT4G23215 | 0.008649265 | 50.232132 | NA                                                                   |
| AT1G78410 | 0.005090197 | 49.318339 | VQ motif-containing protein                                          |
| AT1G68765 | 0.019835811 | 48.263041 | Putative membrane lipoprotein                                        |
| AT5G25250 | 0.000508491 | 47.381154 | SPFH/Band 7/PHB domain-containing membrane-associated protein family |
| AT1G17147 | 0.001629990 | 47.123586 | VQ motif-containing protein                                          |
| AT3G23230 | 0.000865195 | 46.18654  | Integrase-type DNA-binding superfamily protein                       |
| AT3G50930 | 0.007520031 | 45.515464 | cytochrome BC1 syntheti                                              |
| AT4G14450 | 0.007329465 | 44.721585 | hypothetical protein                                                 |
| AT2G35658 | 0.006353902 | 44.615248 | transmembrane protein                                                |
| AT5G28610 | 0.008232785 | 43.611297 | LOW protein: ATP-dependent RNA helicase DRS1-like protein            |
| AT5G46295 | 0.022931053 | 43.320273 | transmembrane protein                                                |

|           |             |           |                                                                                   |
|-----------|-------------|-----------|-----------------------------------------------------------------------------------|
| AT5G25260 | 0.000895880 | 43.264058 | SPFH/Band 7/PHB domain-containing membrane-associated protein family              |
| AT4G15975 | 0.003770558 | 42.413013 | RING/U-box superfamily protein                                                    |
| AT5G64890 | 0.000010850 | 42.33127  | elicitor peptide 2 precursor                                                      |
| AT2G18680 | 0.000213844 | 41.530687 | transmembrane protein                                                             |
| AT2G44370 | 0.010117196 | 41.204938 | Cysteine/Histidine-rich C1 domain family protein                                  |
| AT3G55840 | 0.003338919 | 40.925939 | Hs1pro-1 protein                                                                  |
| AT5G52800 | 0.038637708 | 40.450239 | DNA primase                                                                       |
| AT5G01550 | 0.000306023 | 40.330048 | lectin receptor kinase a4.1                                                       |
| AT1G05575 | 0.028735534 | 39.456481 | transmembrane protein                                                             |
| AT5G52750 | 0.003676689 | 39.415831 | Heavy metal transport/detoxification superfamily protein                          |
| AT1G30700 | 0.003625923 | 39.193422 | FAD-binding Berberine family protein                                              |
| AT4G37780 | 0.019102200 | 39.187163 | myb domain protein 87                                                             |
| AT5G26920 | 0.001478427 | 38.508317 | Cam-binding protein 60-like G                                                     |
| AT1G26420 | 0.001621877 | 38.175414 | FAD-binding Berberine family protein                                              |
| AT3G28580 | 0.043493308 | 37.563465 | P-loop containing nucleoside triphosphate hydrolases superfamily protein          |
| AT4G24570 | 0.000720843 | 37.247202 | dicarboxylate carrier 2                                                           |
| AT2G32030 | 0.004079854 | 36.876408 | Acyl-CoA N-acyltransferases (NAT) superfamily protein                             |
| AT2G27660 | 0.019168923 | 36.624168 | Cysteine/Histidine-rich C1 domain family protein                                  |
| AT4G39670 | 0.002744035 | 35.541121 | Glycolipid transfer protein (GLTP) family protein                                 |
| AT1G36622 | 0.000790311 | 35.400904 | transmembrane protein                                                             |
| AT4G39580 | 0.003327700 | 35.311952 | Galactose oxidase/kelch repeat superfamily protein                                |
| AT1G07135 | 0.000482425 | 35.29817  | glycine-rich protein                                                              |
| AT1G26410 | 0.033853907 | 34.944904 | FAD-binding Berberine family protein                                              |
| AT1G51890 | 0.023313416 | 34.670109 | Leucine-rich repeat protein kinase family protein                                 |
| AT3G25250 | 0.000888323 | 34.167876 | AGC (cAMP-dependent%2C cGMP-dependent and protein kinase C) kinase family protein |
| AT1G05933 | 0.000336931 | 34.094902 | NA                                                                                |
| AT5G62150 | 0.014237380 | 34.081031 | peptidoglycan-binding LysM domain-containing protein                              |
| AT1G61550 | 0.010052508 | 34.011464 | S-locus lectin protein kinase family protein                                      |
| AT5G57510 | 0.001604565 | 33.446128 | cotton fiber protein                                                              |
| AT2G24600 | 0.013742405 | 33.298038 | Ankyrin repeat family protein                                                     |
| AT5G22530 | 0.000783162 | 33.236298 | hypothetical protein                                                              |
| AT1G02400 | 0.008421094 | 32.879827 | gibberellin 2-oxidase 6                                                           |
| AT2G33780 | 0.048919526 | 32.762644 | VQ motif-containing protein                                                       |

|           |             |           |                                                                          |
|-----------|-------------|-----------|--------------------------------------------------------------------------|
| AT1G19020 | 0.000464019 | 32.74105  | CDP-diacylglycerol-glycerol-3-phosphate 3-phosphatidyltransferase        |
| AT5G65600 | 0.025898970 | 32.655092 | Concanavalin A-like lectin protein kinase family protein                 |
| AT5G57190 | 0.030143138 | 31.836551 | phosphatidylserine decarboxylase 2                                       |
| AT5G19240 | 0.002978511 | 31.141334 | Glycoprotein membrane precursor GPI-anchored                             |
| AT1G02360 | 0.014586849 | 30.294298 | Chitinase family protein                                                 |
| AT2G20150 | 0.000031146 | 30.065629 | hypothetical protein                                                     |
| AT1G21110 | 0.020672800 | 29.995332 | O-methyltransferase family protein                                       |
| AT1G65390 | 0.002768522 | 29.837481 | phloem protein 2 A5                                                      |
| AT1G16420 | 0.005319989 | 29.813369 | metacaspase 8                                                            |
| AT2G39200 | 0.007359704 | 29.606705 | Seven transmembrane MLO family protein                                   |
| AT4G23810 | 0.012448821 | 29.551041 | WRKY family transcription factor                                         |
| AT2G22500 | 0.001845236 | 29.447155 | uncoupling protein 5                                                     |
| AT4G14370 | 0.006485322 | 29.14922  | Disease resistance protein (TIR-NBS-LRR class) family                    |
| AT4G30430 | 0.005705089 | 28.98068  | tetraspanin9                                                             |
| AT3G13210 | 0.008326249 | 28.904171 | crooked neck protein%2C putative / cell cycle protein                    |
| AT1G27730 | 0.002016975 | 28.466096 | salt tolerance zinc finger                                               |
| AT2G20562 | 0.000825311 | 27.422266 | taximin                                                                  |
| AT5G14700 | 0.025880202 | 27.420539 | NAD(P)-binding Rossmann-fold superfamily protein                         |
| AT4G39830 | 0.006329321 | 27.327428 | Cupredoxin superfamily protein                                           |
| AT5G35735 | 0.004164240 | 27.13899  | Auxin-responsive family protein                                          |
| AT5G47230 | 0.001625934 | 27.117117 | ethylene responsive element binding factor 5                             |
| AT2G38470 | 0.002937360 | 27.104521 | WRKY DNA-binding protein 33                                              |
| AT3G56790 | 0.028747983 | 26.722445 | RNA splicing factor-like protein                                         |
| AT2G17740 | 0.021229481 | 26.722283 | Cysteine/Histidine-rich C1 domain family protein                         |
| AT4G23320 | 0.025642045 | 26.630759 | cysteine-rich RLK (RECEPTOR-like protein kinase) 24                      |
| AT1G66700 | 0.033101309 | 26.607108 | S-adenosyl-L-methionine-dependent methyltransferases superfamily protein |
| AT4G21390 | 0.009195528 | 26.57728  | S-locus lectin protein kinase family protein                             |
| AT2G44578 | 0.010827937 | 26.186178 | RING/U-box superfamily protein                                           |
| AT3G02585 | 0.040185200 | 25.777541 | NA                                                                       |
| AT1G55450 | 0.016844948 | 25.205596 | S-adenosyl-L-methionine-dependent methyltransferases superfamily protein |
| AT2G25735 | 0.002260286 | 25.191738 | hypothetical protein                                                     |
| AT2G19190 | 0.010826615 | 24.723771 | FLG22-induced receptor-like kinase 1                                     |
| AT3G11840 | 0.007569519 | 24.575529 | E3 ubiquitin-protein ligase PUB24-like protein                           |



|           |             |           |                                                              |
|-----------|-------------|-----------|--------------------------------------------------------------|
| AT2G46430 | 0.005087355 | 24.428758 | cyclic nucleotide gated channel 3                            |
| AT1G09932 | 0.005563094 | 24.282828 | Phosphoglycerate mutase family protein                       |
| AT1G20310 | 0.001196043 | 24.189652 | syringolide-induced protein                                  |
| AT5G44070 | 0.006201499 | 24.122054 | phytochelatin synthase 1 (PCS1)                              |
| AT1G09353 | 0.007311416 | 24.0682   | NA                                                           |
| AT1G47890 | 0.022041989 | 23.974631 | receptor like protein 7                                      |
| AT2G32140 | 0.001742278 | 23.890659 | transmembrane receptor                                       |
| AT1G49000 | 0.002651410 | 23.764584 | transmembrane protein                                        |
| AT3G52400 | 0.008163096 | 23.670143 | syntaxin of plants 122                                       |
| AT4G37370 | 0.003486883 | 23.557497 | cytochrome P450%2C family 81%2C subfamily D%2C polypeptide 8 |
| AT1G18570 | 0.001830428 | 23.552313 | myb domain protein 51                                        |
| AT1G67810 | 0.002877825 | 23.205762 | sulfur E2                                                    |
| AT3G17690 | 0.005979892 | 22.944931 | cyclic nucleotide gated channel 19                           |
| AT1G61360 | 0.025591205 | 22.902694 | S-locus lectin protein kinase family protein                 |
| AT4G40020 | 0.014405584 | 22.90084  | Myosin heavy chain-related protein                           |
| AT4G26200 | 0.002541982 | 22.871745 | 1-amino-cyclopropane-1-carboxylate synthase 7                |
| AT3G21150 | 0.008320584 | 22.703111 | B-box 32                                                     |
| AT4G38560 | 0.001878861 | 22.639571 | phospholipase-like protein (PEARLI 4) family protein         |
| AT3G61190 | 0.010192635 | 22.447971 | BON association protein 1                                    |
| AT2G41105 | 0.017155210 | 22.262172 | hypothetical protein                                         |
| AT3G09520 | 0.001549411 | 22.235855 | exocyst subunit exo70 family protein H4                      |
| AT4G35590 | 0.011777643 | 22.129372 | RWP-RK domain-containing protein                             |
| AT2G35710 | 0.003160027 | 22.020203 | Nucleotide-diphospho-sugar transferases superfamily protein  |
| AT3G43250 | 0.006313835 | 21.958563 | coiled-coil protein (DUF572)                                 |
| AT5G67450 | 0.004540506 | 21.784496 | zinc-finger protein 1                                        |
| AT4G11000 | 0.002336773 | 21.755612 | Ankyrin repeat family protein                                |
| AT4G20780 | 0.004678547 | 21.678455 | calmodulin like 42                                           |
| AT3G13432 | 0.023401419 | 21.63741  | transmembrane protein                                        |
| AT5G41550 | 0.020559410 | 21.616549 | Disease resistance protein (TIR-NBS-LRR class) family        |
| AT5G43420 | 0.004469183 | 21.506177 | RING/U-box superfamily protein                               |
| AT1G57630 | 0.000283763 | 21.495216 | Toll-Interleukin-Resistance (TIR) domain family protein      |
| AT5G57010 | 0.000773148 | 21.45004  | calmodulin-binding family protein                            |
| AT2G08740 | 0.005116927 | 21.200897 | NA                                                           |

|           |             |           |                                                       |
|-----------|-------------|-----------|-------------------------------------------------------|
| AT5G48540 | 0.009389749 | 21.045725 | receptor-like protein kinase-related family protein   |
| AT5G41740 | 0.000778802 | 20.872547 | Disease resistance protein (TIR-NBS-LRR class) family |
| AT1G35230 | 0.010251666 | 20.529235 | arabinogalactan protein 5                             |
| AT2G39380 | 0.035452390 | 20.525373 | exocyst subunit exo70 family protein H2               |
| AT4G04075 | 0.007058090 | 20.456233 | NA                                                    |
| AT1G51920 | 0.001649421 | 20.41985  | transmembrane protein                                 |
| AT5G13485 | 0.009862023 | 20.404201 | NA                                                    |
| AT2G17050 | 0.010861697 | 20.344123 | disease resistance protein (TIR-NBS-LRR class)        |
| AT5G01100 | 0.001492367 | 20.024065 | O-fucosyltransferase family protein                   |
| AT2G44840 | 0.013518592 | 19.946473 | ethylene-responsive element binding factor 13         |
| AT4G08555 | 0.029162473 | 19.661741 | hypothetical protein                                  |
| AT5G60900 | 0.003385693 | 19.623001 | receptor-like protein kinase 1                        |
| AT5G38310 | 0.008535659 | 19.590907 | hypothetical protein                                  |
| AT4G17490 | 0.003884700 | 19.562392 | ethylene responsive element binding factor 6          |
| AT3G55980 | 0.004771019 | 19.560894 | salt-inducible zinc finger 1                          |
| AT5G17350 | 0.000468740 | 19.536983 | hypothetical protein                                  |
| AT3G16530 | 0.000473490 | 19.521821 | Legume lectin family protein                          |
| AT3G17700 | 0.008308782 | 19.502999 | cyclic nucleotide-binding transporter 1               |
| AT1G17420 | 0.033387361 | 19.401114 | lipxygenase 3                                         |
| AT4G36500 | 0.003862932 | 19.376827 | hypothetical protein                                  |
| AT1G13210 | 0.020031244 | 19.212537 | autoinhibited Ca <sup>2+</sup> /ATPase II             |
| AT1G80820 | 0.038099170 | 19.156008 | cinnamoyl coa reductase                               |
| AT5G06775 | 0.000020915 | 19.125014 | NA                                                    |
| AT5G54710 | 0.000090442 | 19.111315 | Ankyrin repeat family protein                         |
| AT2G31865 | 0.002921772 | 19.095835 | poly(ADP-ribose) glycohydrolase 2                     |
| AT1G65481 | 0.000196099 | 18.989122 | transmembrane protein                                 |
| AT3G09830 | 0.000072454 | 18.946228 | Protein kinase superfamily protein                    |
| AT2G02010 | 0.003654485 | 18.945975 | glutamate decarboxylase 4                             |
| AT1G14260 | 0.010723674 | 18.875043 | RING/FYVE/PHD zinc finger superfamily protein         |
| AT5G28630 | 0.007969956 | 18.736763 | glycine-rich protein                                  |
| AT1G07000 | 0.002346079 | 18.537266 | exocyst subunit exo70 family protein B2               |
| AT4G18197 | 0.036615108 | 18.230009 | purine permease 7                                     |
| AT1G21326 | 0.004347912 | 18.153694 | VQ motif-containing protein                           |

|           |             |           |                                                                                        |
|-----------|-------------|-----------|----------------------------------------------------------------------------------------|
| AT4G23170 | 0.005635868 | 18.105115 | receptor-like protein kinase-related family protein                                    |
| AT4G24310 | 0.040372364 | 18.030699 | transmembrane protein%2C putative (DUF679)                                             |
| AT5G36970 | 0.034621501 | 18.020937 | NDR1/HIN1-like 25                                                                      |
| AT4G23180 | 0.011326607 | 17.9211   | cysteine-rich RLK (RECEPTOR-like protein kinase) 10                                    |
| AT2G40140 | 0.000061301 | 17.873071 | zinc finger (CCCH-type) family protein                                                 |
| AT5G09800 | 0.004045136 | 17.857579 | ARM repeat superfamily protein                                                         |
| AT3G25610 | 0.005126873 | 17.707484 | ATPase E1-E2 type family protein / haloacid dehalogenase-like hydrolase family protein |
| AT3G21070 | 0.000772940 | 17.652663 | NAD kinase 1                                                                           |
| AT4G29780 | 0.000644101 | 17.647015 | nuclease                                                                               |
| AT3G19615 | 0.018759437 | 17.554703 | beta-1%2C4-xylosidase                                                                  |
| AT4G23190 | 0.002769017 | 17.550675 | cysteine-rich RLK (RECEPTOR-like protein kinase) 11                                    |
| AT3G02800 | 0.010810745 | 17.306491 | Tyrosine phosphatase family protein                                                    |
| AT5G44585 | 0.022044417 | 17.300954 | hypothetical protein                                                                   |
| AT2G24165 | 0.033916335 | 16.963206 | NA                                                                                     |
| AT1G64065 | 0.002748318 | 16.866632 | Late embryogenesis abundant (LEA) hydroxyproline-rich glycoprotein family              |
| AT2G31880 | 0.005021072 | 16.808311 | Leucine-rich repeat protein kinase family protein                                      |
| AT2G04515 | 0.031812837 | 16.744994 | transmembrane protein                                                                  |
| AT1G30757 | 0.039213223 | 16.741346 | transmembrane protein                                                                  |
| AT4G18205 | 0.022437662 | 16.709431 | Nucleotide-sugar transporter family protein                                            |
| AT1G56470 | 0.047242657 | 16.613468 | NA                                                                                     |
| AT5G54720 | 0.037257503 | 16.589672 | Ankyrin repeat family protein                                                          |
| AT2G15390 | 0.014031094 | 16.544911 | fucosyltransferase 4                                                                   |
| AT2G20142 | 0.000000311 | 16.464912 | Toll-Interleukin-Resistance (TIR) domain family protein                                |
| AT5G08990 | 0.002186984 | 16.462774 | NA                                                                                     |
| AT1G74360 | 0.020697484 | 16.444548 | Leucine-rich repeat protein kinase family protein                                      |
| AT1G80840 | 0.002964154 | 16.431701 | WRKY DNA-binding protein 40                                                            |
| AT2G40180 | 0.000005561 | 16.416547 | phosphatase 2C5                                                                        |
| AT2G35930 | 0.007252766 | 16.411696 | plant U-box 23                                                                         |
| AT5G44910 | 0.000005164 | 16.393345 | Toll-Interleukin-Resistance (TIR) domain family protein                                |
| AT2G15220 | 0.046444994 | 16.344963 | Plant basic secretory protein (BSP) family protein                                     |
| AT4G18253 | 0.002602098 | 16.276771 | receptor Serine/Threonine kinase-like protein                                          |
| AT5G64870 | 0.041948572 | 16.239817 | SPFH/Band 7/PHB domain-containing membrane-associated protein family                   |
| AT1G63870 | 0.023446678 | 16.238853 | Disease resistance protein (TIR-NBS-LRR class) family                                  |

|           |             |           |                                                                           |
|-----------|-------------|-----------|---------------------------------------------------------------------------|
| AT2G46400 | 0.023310506 | 16.228229 | WRKY DNA-binding protein 46                                               |
| AT2G39650 | 0.000526611 | 16.129192 | cruciferin (DUF506)                                                       |
| AT3G04220 | 0.009025668 | 15.757647 | Disease resistance protein (TIR-NBS-LRR class) family                     |
| AT4G27280 | 0.004592753 | 15.755647 | Calcium-binding EF-hand family protein                                    |
| AT1G01340 | 0.002544976 | 15.604602 | cyclic nucleotide gated channel 10                                        |
| AT5G22250 | 0.012639028 | 15.571589 | Polynucleotidyl transferase%2C ribonuclease H-like superfamily protein    |
| AT1G57990 | 0.033494652 | 15.454472 | purine permease 18                                                        |
| AT4G01700 | 0.007361921 | 15.451668 | Chitinase family protein                                                  |
| AT3G10930 | 0.006900432 | 15.195888 | hypothetical protein                                                      |
| AT5G59680 | 0.000126736 | 15.138874 | Leucine-rich repeat protein kinase family protein                         |
| AT3G48450 | 0.026876677 | 14.878224 | RPM1-interacting protein 4 (RIN4) family protein                          |
| AT1G61340 | 0.001288782 | 14.868402 | F-box family protein                                                      |
| AT1G65850 | 0.000015760 | 14.859113 | Disease resistance protein (TIR-NBS-LRR class) family                     |
| AT2G23680 | 0.001957387 | 14.788895 | Cold acclimation protein WCOR413 family                                   |
| AT1G30755 | 0.001216088 | 14.762936 | elongation factor G%2C putative (DUF668)                                  |
| AT4G04540 | 0.001255617 | 14.740871 | cysteine-rich RLK (RECEPTOR-like protein kinase) 39                       |
| AT1G51820 | 0.000790190 | 14.689773 | Leucine-rich repeat protein kinase family protein                         |
| AT1G13340 | 0.001549024 | 14.582138 | Regulator of Vps4 activity in the MVB pathway protein                     |
| AT1G74440 | 0.012961249 | 14.497252 | ER membrane protein%2C putative (DUF962)                                  |
| AT4G39890 | 0.000954118 | 14.492258 | RAB GTPase homolog H1C                                                    |
| AT2G40095 | 0.001387208 | 14.468776 | Alpha/beta hydrolase related protein                                      |
| AT1G11925 | 0.023835664 | 14.449649 | Stigma-specific Stig1 family protein                                      |
| AT2G20960 | 0.005695281 | 14.4208   | phospholipase-like protein (PEARL1 4) family protein                      |
| AT5G39020 | 0.002868657 | 14.320292 | Malectin/receptor-like protein kinase family protein                      |
| AT5G67340 | 0.018315721 | 14.236463 | ARM repeat superfamily protein                                            |
| AT2G35980 | 0.001912234 | 14.231333 | Late embryogenesis abundant (LEA) hydroxyproline-rich glycoprotein family |
| AT3G18710 | 0.019928049 | 14.230636 | plant U-box 29                                                            |
| AT1G69900 | 0.006687259 | 14.155014 | Actin cross-linking protein                                               |
| AT2G28815 | 0.007659526 | 14.07926  | 50S ribosomal protein L16                                                 |
| AT2G32210 | 0.006043021 | 14.072658 | cysteine-rich/transmembrane domain A-like protein                         |
| AT4G22710 | 0.016786556 | 14.028187 | cytochrome P450%2C family 706%2C subfamily A%2C polypeptide 2             |
| AT2G37940 | 0.007961298 | 13.977685 | Inositol phosphorylceramide synthase 2                                    |
| AT2G47140 | 0.024255545 | 13.915324 | NAD(P)-binding Rossmann-fold superfamily protein                          |

|           |             |           |                                                                              |
|-----------|-------------|-----------|------------------------------------------------------------------------------|
| AT3G15356 | 0.000873951 | 13.800052 | Legume lectin family protein                                                 |
| AT4G35480 | 0.000229877 | 13.776059 | RING-H2 finger A3B                                                           |
| AT5G45340 | 0.006743089 | 13.743101 | cytochrome P450%2C family 707%2C subfamily A%2C polypeptide 3                |
| AT1G17240 | 0.005498598 | 13.694627 | receptor like protein 2                                                      |
| AT5G48657 | 0.011675846 | 13.651038 | defense protein-like protein                                                 |
| AT2G22870 | 0.002043055 | 13.628088 | P-loop containing nucleoside triphosphate hydrolases superfamily protein     |
| AT3G21781 | 0.001119572 | 13.612137 | NA                                                                           |
| AT5G66210 | 0.004174906 | 13.563226 | calcium-dependent protein kinase 28                                          |
| AT5G15870 | 0.016496737 | 13.560875 | glycosyl hydrolase family 81 protein                                         |
| AT3G46930 | 0.006972066 | 13.473443 | Protein kinase superfamily protein                                           |
| AT1G69930 | 0.015441269 | 13.459712 | glutathione S-transferase TAU 11                                             |
| AT3G03030 | 0.010265107 | 13.446027 | F-box/RNI-like superfamily protein                                           |
| AT2G25460 | 0.009814825 | 13.38474  | EEIG1/EHBP1 protein amino-terminal domain protein                            |
| AT5G38210 | 0.020590347 | 13.307038 | Protein kinase family protein                                                |
| AT2G39518 | 0.017553369 | 13.282622 | Uncharacterized protein family (UPF0497)                                     |
| AT1G14870 | 0.004130521 | 13.243603 | PLANT CADMIUM RESISTANCE 2                                                   |
| AT3G52450 | 0.012556790 | 13.216812 | plant U-box 22                                                               |
| AT1G59870 | 0.017608561 | 13.193826 | ABC-2 and Plant PDR ABC-type transporter family protein                      |
| AT5G22680 | 0.000661350 | 13.171134 | F-box protein                                                                |
| AT5G25930 | 0.011936459 | 13.06602  | kinase family with leucine-rich repeat domain-containing protein             |
| AT4G38550 | 0.003138286 | 13.033152 | phospholipase-like protein (PEARLI 4) family protein                         |
| AT1G17260 | 0.045777682 | 12.900728 | autoinhibited H[+]-ATPase isoform 10                                         |
| AT1G73810 | 0.009996228 | 12.795669 | Core-2/I-branching beta-1%2C6-N-acetylglucosaminyltransferase family protein |
| AT2G42060 | 0.024557639 | 12.777309 | Cysteine/Histidine-rich C1 domain family protein                             |
| AT1G76970 | 0.005648737 | 12.722604 | Target of Myb protein 1                                                      |
| AT1G30740 | 0.006329677 | 12.629908 | FAD-binding Berberine family protein                                         |
| AT1G59590 | 0.000000179 | 12.595295 | ZCF37                                                                        |
| AT1G51620 | 0.005586744 | 12.548207 | Protein kinase superfamily protein                                           |
| AT3G52520 | 0.002297674 | 12.521549 | hypothetical protein                                                         |
| AT1G24150 | 0.003355371 | 12.447251 | formin homologue 4                                                           |
| AT3G26500 | 0.006408869 | 12.42581  | plant intracellular ras group-related LRR 2                                  |
| AT5G59820 | 0.000005095 | 12.376884 | C2H2-type zinc finger family protein                                         |
| AT3G54420 | 0.018298965 | 12.185301 | homolog of carrot EP3-3 chitinase                                            |

|           |             |           |                                                                         |
|-----------|-------------|-----------|-------------------------------------------------------------------------|
| AT4G11280 | 0.005454683 | 12.181843 | 1-aminocyclopropane-1-carboxylic acid (acc) synthase 6                  |
| AT3G45640 | 0.004494765 | 12.072819 | mitogen-activated protein kinase 3                                      |
| AT1G24147 | 0.000705770 | 12.062847 | transmembrane protein                                                   |
| AT5G41680 | 0.018509774 | 12.055641 | Protein kinase superfamily protein                                      |
| AT3G16720 | 0.002463365 | 12.054748 | TOXICOS EN LEVADURA 2                                                   |
| AT2G36690 | 0.011703403 | 12.042378 | 2-oxoglutarate (2OG) and Fe(II)-dependent oxygenase superfamily protein |
| AT3G55150 | 0.007652878 | 11.935427 | exocyst subunit exo70 family protein H1                                 |
| AT4G31550 | 0.002719392 | 11.886346 | WRKY DNA-binding protein 11                                             |
| AT2G32020 | 0.010734370 | 11.871808 | Acyl-CoA N-acyltransferases (NAT) superfamily protein                   |
| AT5G04340 | 0.014949423 | 11.849233 | 6                                                                       |
| AT3G08720 | 0.003191695 | 11.821705 | serine/threonine protein kinase 2                                       |
| AT4G21920 | 0.026797136 | 11.819229 | hypothetical protein                                                    |
| AT1G10340 | 0.000630592 | 11.76849  | Ankyrin repeat family protein                                           |
| AT5G42010 | 0.010136922 | 11.713647 | Transducin/WD40 repeat-like superfamily protein                         |
| AT2G24160 | 0.002154698 | 11.665722 | NA                                                                      |
| AT1G72920 | 0.029708718 | 11.566879 | Toll-Interleukin-Resistance (TIR) domain family protein                 |
| AT3G02695 | 0.001671988 | 11.565394 | NA                                                                      |
| AT1G74650 | 0.003932352 | 11.563294 | myb domain protein 31                                                   |
| AT1G62300 | 0.016269369 | 11.434819 | WRKY family transcription factor                                        |
| AT5G66790 | 0.000183275 | 11.432794 | Protein kinase superfamily protein                                      |
| AT5G24040 | 0.003643844 | 11.411199 | F-box SKIP23-like protein (DUF295)                                      |
| AT1G53620 | 0.043571358 | 11.37007  | transmembrane protein                                                   |
| AT3G05370 | 0.000009724 | 11.356863 | receptor like protein 31                                                |
| AT2G32200 | 0.009665573 | 11.356322 | cysteine-rich/transmembrane domain A-like protein                       |
| AT5G66620 | 0.000000255 | 11.3356   | DA1-related protein 6                                                   |
| AT5G64310 | 0.000510319 | 11.281347 | arabinogalactan protein 1                                               |
| AT5G42830 | 0.005786832 | 11.274962 | HXXXD-type acyl-transferase family protein                              |
| AT1G61460 | 0.001953270 | 11.272404 | G-type lectin S-receptor-like Serine/Threonine-kinase                   |
| AT2G19130 | 0.013594768 | 11.248204 | S-locus lectin protein kinase family protein                            |
| AT5G48530 | 0.013661169 | 11.242124 | hypothetical protein                                                    |
| AT1G02920 | 0.024486042 | 11.103656 | glutathione S-transferase 7                                             |
| AT5G46080 | 0.002065485 | 11.051607 | Protein kinase superfamily protein                                      |
| AT4G19520 | 0.038804768 | 11.04463  | disease resistance protein (TIR-NBS-LRR class) family                   |

|           |             |           |                                                                        |
|-----------|-------------|-----------|------------------------------------------------------------------------|
| AT1G73805 | 0.007821003 | 10.859912 | Calmodulin binding protein-like protein                                |
| AT4G00970 | 0.028109418 | 10.856981 | cysteine-rich RLK (RECEPTOR-like protein kinase) 41                    |
| AT5G48430 | 0.027673396 | 10.822765 | Eukaryotic aspartyl protease family protein                            |
| AT4G34380 | 0.000014950 | 10.817031 | Transducin/WD40 repeat-like superfamily protein                        |
| AT4G39640 | 0.010826608 | 10.769134 | gamma-glutamyl transpeptidase 1                                        |
| AT3G46090 | 0.000692907 | 10.663594 | C2H2 and C2HC zinc fingers superfamily protein                         |
| AT1G50740 | 0.010524163 | 10.60659  | Transmembrane proteins 14C                                             |
| AT2G33710 | 0.000894563 | 10.588548 | Integrase-type DNA-binding superfamily protein                         |
| AT4G30280 | 0.002517986 | 10.560866 | xyloglucan endotransglucosylase/hydrolase 18                           |
| AT1G51700 | 0.004455448 | 10.483713 | DOF zinc finger protein 1                                              |
| AT4G20830 | 0.003588229 | 10.445312 | FAD-binding Berberine family protein                                   |
| AT1G16130 | 0.005868558 | 10.440499 | wall associated kinase-like 2                                          |
| AT3G16030 | 0.001434695 | 10.413526 | lectin protein kinase family protein                                   |
| AT4G01750 | 0.000014496 | 10.408643 | rhamnogalacturonan xylosyltransferase 2                                |
| AT1G70170 | 0.005686977 | 10.359709 | matrix metalloproteinase                                               |
| AT2G44490 | 0.007379783 | 10.337467 | Glycosyl hydrolase superfamily protein                                 |
| AT3G46680 | 0.031814904 | 10.317414 | UDP-Glycosyltransferase superfamily protein                            |
| AT1G61470 | 0.001610296 | 10.301322 | Polynucleotidyl transferase%2C ribonuclease H-like superfamily protein |
| AT4G01010 | 0.002089424 | 10.201127 | cyclic nucleotide-gated channel 13                                     |
| AT3G23010 | 0.000027154 | 10.195001 | receptor like protein 36                                               |
| AT1G04567 | 0.044752867 | 10.184794 | NA                                                                     |
| AT1G18390 | 0.003778437 | 10.12505  | Serine/Threonine kinase family catalytic domain protein                |
| AT4G11300 | 0.001276099 | 10.12209  | ROH1%2C putative (DUF793)                                              |
| AT5G58120 | 0.010654038 | 10.051634 | Disease resistance protein (TIR-NBS-LRR class) family                  |
| AT1G23710 | 0.003243205 | 10.034149 | hypothetical protein (DUF1645)                                         |
| AT1G51800 | 0.002600093 | 10.028536 | Leucine-rich repeat protein kinase family protein                      |
| AT5G54490 | 0.031524044 | 10.00639  | pinoid-binding protein 1                                               |
| AT4G12720 | 0.001238849 | 9.9615139 | MutT/nudix family protein                                              |
| AT5G48380 | 0.002243140 | 9.9563807 | BAK1-interacting receptor-like kinase 1                                |
| AT4G34390 | 0.003040187 | 9.9307158 | extra-large GTP-binding protein 2                                      |
| AT4G23030 | 0.001581864 | 9.8734361 | MATE efflux family protein                                             |
| AT3G57640 | 0.007255155 | 9.8683605 | Protein kinase superfamily protein                                     |
| AT3G11080 | 0.011751186 | 9.8596693 | receptor like protein 35                                               |

|           |             |           |                                                                           |
|-----------|-------------|-----------|---------------------------------------------------------------------------|
| AT4G01950 | 0.022951143 | 9.7603809 | glycerol-3-phosphate acyltransferase 3                                    |
| AT1G66465 | 0.046821049 | 9.700335  | transmembrane protein                                                     |
| AT4G11521 | 0.020211576 | 9.666461  | Receptor-like protein kinase-related family protein                       |
| AT1G68690 | 0.001511583 | 9.6569718 | Protein kinase superfamily protein                                        |
| AT1G72950 | 0.003219368 | 9.6417145 | Disease resistance protein (TIR-NBS class)                                |
| AT2G26190 | 0.003268562 | 9.6344391 | calmodulin-binding family protein                                         |
| AT5G25910 | 0.002663416 | 9.5561161 | receptor like protein 52                                                  |
| AT5G64660 | 0.000099579 | 9.5323409 | CYS%2C MET%2C PRO%2C and GLY protein 2                                    |
| AT4G22690 | 0.003957962 | 9.5133879 | cytochrome P450%2C family 706%2C subfamily A%2C polypeptide 1             |
| AT1G65690 | 0.045361315 | 9.4856989 | Late embryogenesis abundant (LEA) hydroxyproline-rich glycoprotein family |
| AT5G41100 | 0.002819959 | 9.4769126 | hydroxyproline-rich glycoprotein family protein                           |
| AT1G71400 | 0.000057826 | 9.4642874 | receptor like protein 12                                                  |
| AT4G34150 | 0.004898655 | 9.4003    | Calcium-dependent lipid-binding (CaLB domain) family protein              |
| AT1G04625 | 0.008576808 | 9.3735973 | Polynucleotidyl transferase%2C ribonuclease H-like superfamily protein    |
| AT2G36220 | 0.006971758 | 9.3731254 | hypothetical protein                                                      |
| AT2G33580 | 0.006536319 | 9.3545221 | Protein kinase superfamily protein                                        |
| AT3G28340 | 0.007045106 | 9.3066744 | galacturonosyltransferase-like 10                                         |
| AT3G44260 | 0.003418008 | 9.2983968 | Polynucleotidyl transferase%2C ribonuclease H-like superfamily protein    |
| AT5G58940 | 0.016413793 | 9.239581  | calmodulin-binding receptor-like cytoplasmic kinase 1                     |
| AT5G05190 | 0.000438813 | 9.2184662 | hypothetical protein (DUF3133)                                            |
| AT4G23550 | 0.005111348 | 9.2095116 | WRKY family transcription factor                                          |
| AT4G04700 | 0.014617110 | 9.1939235 | calcium-dependent protein kinase 27                                       |
| AT4G39570 | 0.024867070 | 9.183773  | Galactose oxidase/kelch repeat superfamily protein                        |
| AT1G21130 | 0.016484719 | 9.1095199 | O-methyltransferase family protein                                        |
| AT5G22690 | 0.006257059 | 9.0819627 | Disease resistance protein (TIR-NBS-LRR class) family                     |
| AT3G10720 | 0.008154744 | 9.0636679 | Plant invertase/pectin methylesterase inhibitor superfamily               |
| AT2G46940 | 0.006746153 | 8.9786754 | fold protein                                                              |
| AT4G02410 | 0.011751109 | 8.9741497 | Concanavalin A-like lectin protein kinase family protein                  |
| AT2G13800 | 0.016084306 | 8.9621644 | somatic embryogenesis receptor-like kinase 5                              |
| AT3G51300 | 0.030957554 | 8.957704  | RHO-related protein from plants 1                                         |
| AT3G20520 | 0.008253932 | 8.9576997 | SHV3-like 3                                                               |
| AT1G02930 | 0.009759027 | 8.9297631 | glutathione S-transferase 6                                               |
| AT5G47960 | 0.005849072 | 8.9056597 | RAB GTPase homolog A4C                                                    |



|           |             |           |                                                                                        |
|-----------|-------------|-----------|----------------------------------------------------------------------------------------|
| AT4G30210 | 0.007226079 | 8.9045251 | P450 reductase 2                                                                       |
| AT1G69890 | 0.005754911 | 8.7763049 | actin cross-linking protein (DUF569)                                                   |
| AT3G45960 | 0.024572272 | 8.7487412 | expansin-like A3                                                                       |
| AT1G09940 | 0.001640424 | 8.7175643 | Glutamyl-tRNA reductase family protein                                                 |
| AT4G23200 | 0.012170045 | 8.7149298 | cysteine-rich RLK (RECEPTOR-like protein kinase) 12                                    |
| AT2G13790 | 0.003252109 | 8.7078418 | somatic embryogenesis receptor-like kinase 4                                           |
| AT1G72900 | 0.017802207 | 8.6774965 | Toll-Interleukin-Resistance (TIR) domain-containing protein                            |
| AT3G23250 | 0.029698269 | 8.6493142 | myb domain protein 15                                                                  |
| AT2G37830 | 0.034586829 | 8.6335989 | NA                                                                                     |
| AT1G32920 | 0.007403554 | 8.6286617 | hypothetical protein                                                                   |
| AT5G47910 | 0.022274664 | 8.6286204 | respiratory burst oxidase homologue D                                                  |
| AT4G11850 | 0.009514755 | 8.6231511 | phospholipase D gamma 1                                                                |
| AT1G20823 | 0.003454414 | 8.6124822 | RING/U-box superfamily protein                                                         |
| AT5G46520 | 0.010238863 | 8.5559158 | Disease resistance protein (TIR-NBS-LRR class) family                                  |
| AT4G23210 | 0.000060083 | 8.5427746 | cysteine-rich RLK (RECEPTOR-like protein kinase) 13                                    |
| AT1G27770 | 0.015085642 | 8.5251982 | autoinhibited Ca <sup>2+</sup> -ATPase 1                                               |
| AT5G12880 | 0.010658746 | 8.5186255 | proline-rich family protein                                                            |
| AT1G55365 | 0.001718690 | 8.5181517 | hypothetical protein                                                                   |
| AT1G18300 | 0.007977950 | 8.4912591 | nudix hydrolase homolog 4                                                              |
| AT5G49520 | 0.000917022 | 8.4173219 | WRKY DNA-binding protein 48                                                            |
| AT1G19780 | 0.018204789 | 8.3934959 | cyclic nucleotide gated channel 8                                                      |
| AT3G11820 | 0.033555528 | 8.3924787 | syntaxin of plants 121                                                                 |
| AT3G28850 | 0.000302256 | 8.3815068 | Glutaredoxin family protein                                                            |
| AT3G59700 | 0.017580755 | 8.3738691 | lectin-receptor kinase                                                                 |
| AT1G01480 | 0.010481221 | 8.3414465 | 1-amino-cyclopropane-1-carboxylate synthase 2                                          |
| AT3G13900 | 0.042697273 | 8.3291491 | ATPase E1-E2 type family protein / haloacid dehalogenase-like hydrolase family protein |
| AT4G08850 | 0.022166677 | 8.3211391 | Leucine-rich repeat receptor-like protein kinase family protein                        |
| AT4G37640 | 0.005389571 | 8.3108336 | calcium ATPase 2                                                                       |
| AT4G25719 | 0.013712654 | 8.2865209 | NA                                                                                     |
| AT3G16860 | 0.013211132 | 8.2464044 | COBRA-like protein 8 precursor                                                         |
| AT3G09870 | 0.022628176 | 8.2415863 | SAUR-like auxin-responsive protein family                                              |
| AT4G37770 | 0.012343368 | 8.1218199 | 1-amino-cyclopropane-1-carboxylate synthase 8                                          |
| AT5G23510 | 0.004186905 | 8.1039488 | hypothetical protein                                                                   |

|           |             |           |                                                                                             |
|-----------|-------------|-----------|---------------------------------------------------------------------------------------------|
| AT1G33600 | 0.000060708 | 8.0891774 | Leucine-rich repeat (LRR) family protein                                                    |
| AT1G67520 | 0.048420477 | 8.0608785 | lectin protein kinase family protein                                                        |
| AT4G01250 | 0.004040131 | 8.0491338 | WRKY family transcription factor                                                            |
| AT1G11310 | 0.013398115 | 8.0399102 | Seven transmembrane MLO family protein                                                      |
| AT4G12120 | 0.002145903 | 7.9719257 | Sec1/munc18-like (SM) proteins superfamily                                                  |
| AT1G42990 | 0.003969844 | 7.9716574 | basic region/leucine zipper motif 60                                                        |
| AT2G35000 | 0.000935360 | 7.966739  | RING/U-box superfamily protein                                                              |
| AT3G50950 | 0.003504144 | 7.9485249 | HOPZ-ACTIVATED RESISTANCE 1                                                                 |
| AT5G66675 | 0.012435271 | 7.9381288 | transmembrane protein%2C putative (DUF677)                                                  |
| AT1G59910 | 0.003897911 | 7.9103642 | Actin-binding FH2 (formin homology 2) family protein                                        |
| AT3G01835 | 0.031251677 | 7.9013265 | NA                                                                                          |
| AT2G32190 | 0.004522730 | 7.8998025 | cysteine-rich/transmembrane domain A-like protein                                           |
| AT3G56710 | 0.001642171 | 7.8290324 | sigma factor binding protein 1                                                              |
| AT1G51660 | 0.001144629 | 7.822222  | mitogen-activated protein kinase kinase 4                                                   |
| AT2G46620 | 0.003080793 | 7.8172628 | P-loop containing nucleoside triphosphate hydrolases superfamily protein                    |
| AT5G61560 | 0.006520658 | 7.816017  | U-box domain-containing protein kinase family protein                                       |
| AT1G19770 | 0.015278187 | 7.8090125 | purine permease 14                                                                          |
| AT5G59730 | 0.010870134 | 7.8004649 | exocyst subunit exo70 family protein H7                                                     |
| AT1G56540 | 0.006346640 | 7.7852636 | Disease resistance protein (TIR-NBS-LRR class) family                                       |
| AT1G70420 | 0.010983685 | 7.7596138 | DNA ligase-like protein%2C putative (DUF1645)                                               |
| AT5G46910 | 0.001711838 | 7.7584163 | Transcription factor jumonji (jmj) family protein / zinc finger (C5HC2 type) family protein |
| AT3G26910 | 0.001688312 | 7.7489433 | hydroxyproline-rich glycoprotein family protein                                             |
| AT3G50760 | 0.006901001 | 7.7453136 | galacturonosyltransferase-like 2                                                            |
| AT1G66880 | 0.008653544 | 7.7325691 | Protein kinase superfamily protein                                                          |
| AT2G33110 | 0.002688593 | 7.7236562 | vesicle-associated membrane protein 723                                                     |
| AT1G07647 | 0.049681545 | 7.702491  | NA                                                                                          |
| AT1G76070 | 0.001399847 | 7.6812951 | hypothetical protein                                                                        |
| AT5G25920 | 0.030956654 | 7.6589954 | hypothetical protein                                                                        |
| AT1G08050 | 0.000000838 | 7.6579616 | Zinc finger (C3HC4-type RING finger) family protein                                         |
| AT5G66650 | 0.011055767 | 7.654662  | calcium uniporter (DUF607)                                                                  |
| AT1G03370 | 0.000450826 | 7.6292286 | C2 calcium/lipid-binding and GRAM domain containing protein                                 |
| AT5G26030 | 0.006446332 | 7.6042505 | ferrochelatase 1                                                                            |
| AT3G57450 | 0.024789666 | 7.5721768 | hypothetical protein                                                                        |

|           |             |           |                                                                |
|-----------|-------------|-----------|----------------------------------------------------------------|
| AT3G50260 | 0.023386986 | 7.5560749 | cooperatively regulated by ethylene and jasmonate 1            |
| AT1G70581 | 0.028540209 | 7.5238878 | NA                                                             |
| AT5G54860 | 0.002116328 | 7.5186989 | Major facilitator superfamily protein                          |
| AT5G06320 | 0.005296439 | 7.4814526 | NDR1/HIN1-like 3                                               |
| AT1G70140 | 0.002360089 | 7.4708525 | formin 8                                                       |
| AT3G46080 | 0.004076752 | 7.4355648 | C2H2-type zinc finger family protein                           |
| AT4G28350 | 0.017840480 | 7.4219109 | Concanavalin A-like lectin protein kinase family protein       |
| AT5G63390 | 0.023758447 | 7.3733119 | O-fucosyltransferase family protein                            |
| AT3G57740 | 0.012246690 | 7.2458697 | Protein kinase superfamily protein                             |
| AT4G18170 | 0.017655747 | 7.235082  | WRKY DNA-binding protein 28                                    |
| AT1G56140 | 0.003341671 | 7.2157807 | Leucine-rich repeat transmembrane protein kinase               |
| AT1G29690 | 0.003986424 | 7.198256  | MAC/Perforin domain-containing protein                         |
| AT1G51790 | 0.001104074 | 7.1391271 | Leucine-rich repeat protein kinase family protein              |
| AT5G39580 | 0.006074519 | 7.1347045 | Peroxidase superfamily protein                                 |
| AT1G59865 | 0.014364605 | 7.109708  | transmembrane protein                                          |
| AT2G47550 | 0.030490657 | 7.1032142 | Plant invertase/pectin methylesterase inhibitor superfamily    |
| AT3G54410 | 0.002528457 | 7.0985436 | hypothetical protein (DUF1163)                                 |
| AT3G46620 | 0.004010946 | 7.0973027 | zinc finger (C3HC4-type RING finger) family protein            |
| AT1G18970 | 0.005374015 | 7.0735378 | germin-like protein 4                                          |
| AT1G04370 | 0.017494863 | 7.0681161 | Ethylene-responsive element binding factor 14                  |
| AT2G09925 | 0.027769885 | 7.0412986 | NA                                                             |
| AT2G28830 | 0.000322084 | 7.0239895 | armadillo/beta-catenin repeat protein                          |
| AT5G61210 | 0.006610569 | 7.0142671 | soluble N-ethylmaleimide-sensitive factor adaptor protein 33   |
| AT5G52790 | 0.009043626 | 6.9725206 | CBS domain protein with a domain protein (DUF21)               |
| AT5G37450 | 0.008834413 | 6.9530941 | Leucine-rich repeat protein kinase family protein              |
| AT3G46110 | 0.000171638 | 6.9430152 | UPSTREAM OF FLC-like protein (DUF966)                          |
| AT1G67800 | 0.003715093 | 6.9359945 | Copine (Calcium-dependent phospholipid-binding protein) family |
| AT4G19370 | 0.009797892 | 6.90274   | chitin synthase%2C putative (DUF1218)                          |
| AT3G52430 | 0.018099500 | 6.8657611 | alpha/beta-Hydrolases superfamily protein                      |
| AT1G70130 | 0.005483931 | 6.8480448 | Concanavalin A-like lectin protein kinase family protein       |
| AT5G66070 | 0.010358889 | 6.8474737 | RING/U-box superfamily protein                                 |
| AT1G33610 | 0.005515593 | 6.8290015 | Leucine-rich repeat (LRR) family protein                       |
| AT1G63245 | 0.012368552 | 6.8099192 | CLAVATA3/ESR-RELATED 14                                        |

|           |             |           |                                                                                                 |
|-----------|-------------|-----------|-------------------------------------------------------------------------------------------------|
| AT3G63060 | 0.041168036 | 6.8026876 | EID1-like 3                                                                                     |
| AT2G05875 | 0.007238622 | 6.7977432 | NA                                                                                              |
| AT5G64120 | 0.005719932 | 6.7364666 | Peroxidase superfamily protein                                                                  |
| AT1G64010 | 0.039506411 | 6.7332761 | Serine protease inhibitor (SERPIN) family protein                                               |
| AT1G77390 | 0.001160162 | 6.7316815 | CYCLIN A1%3B2                                                                                   |
| AT5G02690 | 0.005516718 | 6.7314028 | hypothetical protein                                                                            |
| AT5G01005 | 0.000078803 | 6.7284689 | NA                                                                                              |
| AT4G16957 | 0.028281290 | 6.7254276 | SUPPRESSOR OF%2C CONSTITUTIVE protein                                                           |
| AT4G40080 | 0.004384683 | 6.7152457 | ENTH/ANTH/VHS superfamily protein                                                               |
| AT1G28380 | 0.001115902 | 6.713088  | MAC/Perforin domain-containing protein                                                          |
| AT5G67430 | 0.003763266 | 6.7030484 | Acyl-CoA N-acyltransferases (NAT) superfamily protein                                           |
| AT1G34420 | 0.024133887 | 6.6905959 | leucine-rich repeat transmembrane protein kinase family protein                                 |
| AT2G20880 | 0.014617962 | 6.6789257 | Integrase-type DNA-binding superfamily protein                                                  |
| AT5G48410 | 0.045052350 | 6.6759154 | glutamate receptor 1.3                                                                          |
| AT1G78860 | 0.004394771 | 6.6716294 | D-mannose binding lectin protein with Apple-like carbohydrate-binding domain-containing protein |
| AT3G09010 | 0.019919339 | 6.6434528 | Protein kinase superfamily protein                                                              |
| AT2G35637 | 0.015181503 | 6.6342479 | NA                                                                                              |
| AT4G28550 | 0.001161440 | 6.6263393 | Ypt/Rab-GAP domain of gyp1p superfamily protein                                                 |
| AT3G26980 | 0.000001657 | 6.6235643 | membrane-anchored ubiquitin-fold protein 4 precursor                                            |
| AT2G23810 | 0.004097902 | 6.6171171 | tetraspanin8                                                                                    |
| AT1G76600 | 0.000001436 | 6.6031928 | poly polymerase                                                                                 |
| AT1G14370 | 0.005545595 | 6.5914141 | protein kinase 2A                                                                               |
| AT2G15040 | 0.027976877 | 6.5862778 | NA                                                                                              |
| AT2G04500 | 0.000422091 | 6.5809074 | Cysteine/Histidine-rich C1 domain family protein                                                |
| AT1G65486 | 0.004391635 | 6.5633111 | transmembrane protein                                                                           |
| AT4G29050 | 0.018497798 | 6.5611305 | Concanavalin A-like lectin protein kinase family protein                                        |
| AT3G47875 | 0.044867428 | 6.5449172 | NA                                                                                              |
| AT4G18880 | 0.000045633 | 6.5435259 | heat shock transcription factor A4A                                                             |
| AT2G23770 | 0.000005870 | 6.525094  | protein kinase family protein / peptidoglycan-binding LysM domain-containing protein            |
| AT3G19002 | 0.002231871 | 6.48478   | NA                                                                                              |
| AT1G11050 | 0.005137452 | 6.484401  | Protein kinase superfamily protein                                                              |
| AT4G11330 | 0.021250597 | 6.466088  | MAP kinase 5                                                                                    |
| AT2G15480 | 0.003647190 | 6.4602722 | UDP-glucosyl transferase 73B5                                                                   |

|           |             |           |                                                                                           |
|-----------|-------------|-----------|-------------------------------------------------------------------------------------------|
| AT4G15233 | 0.026029355 | 6.4446112 | ABC-2 and Plant PDR ABC-type transporter family protein                                   |
| AT1G33760 | 0.000032735 | 6.4321679 | Integrase-type DNA-binding superfamily protein                                            |
| AT3G28210 | 0.005112127 | 6.4293028 | zinc finger (AN1-like) family protein                                                     |
| AT1G16110 | 0.002871462 | 6.3900985 | wall associated kinase-like 6                                                             |
| AT3G03125 | 0.030696153 | 6.3838085 | NA                                                                                        |
| AT1G64610 | 0.005110452 | 6.3827269 | Transducin/WD40 repeat-like superfamily protein                                           |
| AT3G19010 | 0.012141975 | 6.3720726 | 2-oxoglutarate (2OG) and Fe(II)-dependent oxygenase superfamily protein                   |
| AT1G09950 | 0.016460705 | 6.3354348 | RESPONSE TO ABA AND SALT 1                                                                |
| AT2G31870 | 0.000004874 | 6.3244945 | Poly (ADP-ribose) glycohydrolase (PARG)                                                   |
| AT1G67470 | 0.000322557 | 6.3098175 | Protein kinase superfamily protein                                                        |
| AT1G14040 | 0.029909825 | 6.3001546 | EXS (ERD1/XPR1/SYG1) family protein                                                       |
| AT3G13100 | 0.007595491 | 6.2769469 | multidrug resistance-associated protein 7                                                 |
| AT5G44568 | 0.012036083 | 6.2675771 | transmembrane protein                                                                     |
| AT1G65240 | 0.003085279 | 6.2665639 | Eukaryotic aspartyl protease family protein                                               |
| AT4G31800 | 0.015163618 | 6.2641608 | WRKY DNA-binding protein 18                                                               |
| AT3G25600 | 0.000007995 | 6.2495573 | Calcium-binding EF-hand family protein                                                    |
| AT5G45000 | 0.026774624 | 6.2409606 | Disease resistance protein (TIR-NBS-LRR class) family                                     |
| AT3G20600 | 0.000369368 | 6.2307497 | Late embryogenesis abundant (LEA) hydroxyproline-rich glycoprotein family                 |
| AT5G63130 | 0.001760733 | 6.1928952 | Octicosapeptide/Phox/Bem1p family protein                                                 |
| AT4G34460 | 0.007451597 | 6.1373658 | GTP binding protein beta 1                                                                |
| AT3G47820 | 0.000775947 | 6.1297782 | PLANT U-BOX 39                                                                            |
| AT4G24160 | 0.000588650 | 6.1254882 | alpha/beta-Hydrolases superfamily protein                                                 |
| AT3G59080 | 0.001750048 | 6.1248579 | Eukaryotic aspartyl protease family protein                                               |
| AT3G05580 | 0.000182341 | 6.0645162 | Calcineurin-like metallo-phosphoesterase superfamily protein                              |
| AT3G57530 | 0.016266157 | 6.0522212 | calcium-dependent protein kinase 32                                                       |
| AT3G13600 | 0.014067810 | 6.0469089 | calmodulin-binding family protein                                                         |
| AT1G71697 | 0.005216372 | 6.0364855 | choline kinase 1                                                                          |
| AT4G22640 | 0.043101939 | 6.017872  | Bifunctional inhibitor/lipid-transfer protein/seed storage 2S albumin superfamily protein |
| AT3G48090 | 0.000012945 | 6.0078913 | alpha/beta-Hydrolases superfamily protein                                                 |
| AT4G02200 | 0.002154253 | 5.9746082 | Drought-responsive family protein                                                         |
| AT1G51850 | 0.006678945 | 5.9662691 | Leucine-rich repeat protein kinase family protein                                         |
| AT1G72280 | 0.014538701 | 5.9617549 | endoplasmic reticulum oxidoreductins 1                                                    |
| AT5G18470 | 0.022165828 | 5.9518819 | Curculin-like (mannose-binding) lectin family protein                                     |

|           |             |           |                                                             |
|-----------|-------------|-----------|-------------------------------------------------------------|
| AT1G75000 | 0.000197900 | 5.9165453 | GNS1/SUR4 membrane protein family                           |
| AT1G52200 | 0.001611863 | 5.8583871 | PLAC8 family protein                                        |
| AT3G49530 | 0.006911939 | 5.8557062 | NAC domain containing protein 62                            |
| AT3G23120 | 0.015285369 | 5.8498735 | receptor like protein 38                                    |
| AT1G34260 | 0.000004267 | 5.8437342 | FORMS APLOID AND BINUCLEATE CELLS 1A                        |
| AT3G47090 | 0.048118976 | 5.8391374 | Leucine-rich repeat protein kinase family protein           |
| AT3G21630 | 0.001116299 | 5.8341174 | chitin elicitor receptor kinase 1                           |
| AT1G56510 | 0.007280340 | 5.8313477 | Disease resistance protein (TIR-NBS-LRR class)              |
| AT3G55950 | 0.000029827 | 5.8075978 | CRINKLY4 related 3                                          |
| AT5G46510 | 0.002787324 | 5.7810636 | Disease resistance protein (TIR-NBS-LRR class) family       |
| AT3G09405 | 0.000039902 | 5.7481061 | Pectinacylesterase family protein                           |
| AT5G06090 | 0.029607269 | 5.7412414 | glycerol-3-phosphate acyltransferase 7                      |
| AT2G24130 | 0.005769477 | 5.718752  | Leucine-rich receptor-like protein kinase family protein    |
| AT1G66500 | 0.000194016 | 5.716265  | Pre-mRNA cleavage complex II                                |
| AT1G08930 | 0.014236739 | 5.711243  | Major facilitator superfamily protein                       |
| AT4G29740 | 0.004149485 | 5.6992487 | cytokinin oxidase 4                                         |
| AT1G30730 | 0.016740867 | 5.6957677 | FAD-binding Berberine family protein                        |
| AT5G10695 | 0.004454535 | 5.6829743 | methionyl-tRNA synthetase                                   |
| AT3G13437 | 0.005670330 | 5.6267582 | transmembrane protein                                       |
| AT1G16120 | 0.000277360 | 5.6248844 | wall associated kinase-like 1                               |
| AT2G41100 | 0.000896238 | 5.6194039 | Calcium-binding EF hand family protein                      |
| AT1G72910 | 0.024426907 | 5.6115395 | Toll-Interleukin-Resistance (TIR) domain-containing protein |
| AT5G44060 | 0.014792471 | 5.5942377 | embryo sac development arrest protein                       |
| AT1G25390 | 0.001493594 | 5.5890658 | Protein kinase superfamily protein                          |
| AT5G15130 | 0.048808795 | 5.5800797 | WRKY DNA-binding protein 72                                 |
| AT1G23840 | 0.009528391 | 5.570189  | transmembrane protein                                       |
| AT1G21010 | 0.000010962 | 5.5594104 | poly polymerase                                             |
| AT3G08710 | 0.001582933 | 5.5523519 | thioredoxin H-type 9                                        |
| AT1G30720 | 0.006858978 | 5.5472842 | FAD-binding Berberine family protein                        |
| AT3G10815 | 0.013422555 | 5.5468205 | RING/U-box superfamily protein                              |
| AT3G13850 | 0.012657660 | 5.5079874 | LOB domain-containing protein 22                            |
| AT5G40170 | 0.003156876 | 5.506163  | receptor like protein 54                                    |
| AT1G67920 | 0.034930065 | 5.4958869 | hypothetical protein                                        |

|           |             |           |                                                                                        |
|-----------|-------------|-----------|----------------------------------------------------------------------------------------|
| AT2G24570 | 0.000012150 | 5.4936094 | WRKY DNA-binding protein 17                                                            |
| AT5G13190 | 0.002167752 | 5.4915294 | GSH-induced LITAF domain protein                                                       |
| AT2G28400 | 0.004252587 | 5.4885955 | senescence regulator (Protein of unknown function%2C DUF584)                           |
| AT3G52748 | 0.041462615 | 5.4816002 | NA                                                                                     |
| AT3G53280 | 0.022692903 | 5.4691054 | cytochrome p450 71b5                                                                   |
| AT3G06890 | 0.003518192 | 5.4646676 | transmembrane protein                                                                  |
| AT3G07600 | 0.007964902 | 5.4587678 | Heavy metal transport/detoxification superfamily protein                               |
| AT5G02290 | 0.000571764 | 5.4574766 | Protein kinase superfamily protein                                                     |
| AT1G63720 | 0.000004174 | 5.4535962 | hydroxyproline-rich glycoprotein family protein                                        |
| AT5G12930 | 0.001218702 | 5.4529069 | inactive rhomboid protein                                                              |
| AT1G63750 | 0.005331147 | 5.447134  | Disease resistance protein (TIR-NBS-LRR class) family                                  |
| AT4G02330 | 0.031363213 | 5.4470889 | Plant invertase/pectin methylesterase inhibitor superfamily                            |
| AT5G48400 | 0.006251275 | 5.4461208 | Glutamate receptor family protein                                                      |
| AT4G36550 | 0.003787486 | 5.4363896 | ARM repeat superfamily protein                                                         |
| AT2G30020 | 0.004201895 | 5.4355788 | Protein phosphatase 2C family protein                                                  |
| AT2G31945 | 0.008511188 | 5.4212702 | transmembrane protein                                                                  |
| AT1G33420 | 0.014469094 | 5.4038485 | RING/FYVE/PHD zinc finger superfamily protein                                          |
| AT2G31990 | 0.008136351 | 5.3919756 | Exostosin family protein                                                               |
| AT5G11670 | 0.005443069 | 5.3664841 | NADP-malic enzyme 2                                                                    |
| AT2G47060 | 0.005580474 | 5.3576818 | Protein kinase superfamily protein                                                     |
| AT5G06230 | 0.001303403 | 5.3360454 | TRICHOME BIREFRINGENCE-LIKE 9                                                          |
| AT1G68330 | 0.007011341 | 5.291647  | membrane-associated kinase regulator                                                   |
| AT3G22910 | 0.012340736 | 5.2852627 | ATPase E1-E2 type family protein / haloacid dehalogenase-like hydrolase family protein |
| AT2G37370 | 0.038747273 | 5.2656218 | centrosomal protein of 135 kDa-like protein                                            |
| AT1G16670 | 0.004155738 | 5.2584097 | Protein kinase superfamily protein                                                     |
| AT1G76680 | 0.000714085 | 5.2481895 | 12-oxophytodienoate reductase 1                                                        |
| AT1G03740 | 0.006617784 | 5.2473801 | Protein kinase superfamily protein                                                     |
| AT2G17220 | 0.002996940 | 5.2454271 | Protein kinase superfamily protein                                                     |
| AT1G07897 | 0.033864150 | 5.244744  | NA                                                                                     |
| AT5G25050 | 0.002307961 | 5.230547  | Major facilitator superfamily protein                                                  |
| AT2G22890 | 0.021352699 | 5.2267171 | Kua-ubiquitin conjugating enzyme hybrid localization domain-containing protein         |
| AT2G36770 | 0.009887770 | 5.2266594 | UDP-Glycosyltransferase superfamily protein                                            |
| AT5G03390 | 0.009754509 | 5.2181041 | hypothetical protein (DUF295)                                                          |

|           |             |           |                                                                             |
|-----------|-------------|-----------|-----------------------------------------------------------------------------|
| AT1G09363 | 0.013394623 | 5.210316  | NA                                                                          |
| AT4G01090 | 0.002272501 | 5.1974133 | hypothetical protein (DUF3133)                                              |
| AT3G45650 | 0.000088093 | 5.1735121 | nitrate excretion transporter1                                              |
| AT1G16640 | 0.033399659 | 5.1603615 | AP2/B3-like transcriptional factor family protein                           |
| AT3G16510 | 0.000490127 | 5.1548586 | Calcium-dependent lipid-binding (CaLB domain) family protein                |
| AT1G30620 | 0.000183443 | 5.1299753 | NAD(P)-binding Rossmann-fold superfamily protein                            |
| AT3G08870 | 0.000492939 | 5.1219754 | Concanavalin A-like lectin protein kinase family protein                    |
| AT1G72960 | 0.012276876 | 5.1128867 | Root hair defective 3 GTP-binding protein (RHD3)                            |
| AT2G29720 | 0.003393975 | 5.1127594 | FAD/NAD(P)-binding oxidoreductase family protein                            |
| AT1G80450 | 0.000631022 | 5.1075172 | VQ motif-containing protein                                                 |
| AT3G44400 | 0.006826026 | 5.1016227 | Disease resistance protein (TIR-NBS-LRR class) family                       |
| AT5G01830 | 0.000893578 | 5.1004853 | ARM repeat superfamily protein                                              |
| AT4G27980 | 0.000580970 | 5.0954054 | trichohyalin-like protein (DUF3444)                                         |
| AT5G65300 | 0.021475917 | 5.0594187 | hypothetical protein                                                        |
| AT1G61800 | 0.045490330 | 5.0569349 | glucose-6-phosphate/phosphate translocator 2                                |
| AT5G46500 | 0.014761599 | 5.0443698 | protein VARIATION IN COMPOUND TRIGGERED ROOT growth protein                 |
| AT5G53230 | 0.042712793 | 5.0441068 | hypothetical protein (DUF295)                                               |
| AT5G03380 | 0.002975627 | 5.0430807 | Heavy metal transport/detoxification superfamily protein                    |
| AT1G61370 | 0.007781284 | 5.0411352 | S-locus lectin protein kinase family protein                                |
| AT4G38940 | 0.009536302 | 5.0391796 | Galactose oxidase/kelch repeat superfamily protein                          |
| AT1G65510 | 0.005160090 | 5.0300653 | transmembrane protein                                                       |
| AT5G62470 | 0.001946766 | 5.012644  | myb domain protein 96                                                       |
| AT4G22470 | 0.017583021 | 5.008733  | protease inhibitor/seed storage/lipid transfer protein (LTP) family protein |
| AT3G50470 | 0.005938881 | 4.9982671 | homolog of RPW8 3                                                           |
| AT3G50190 | 0.021716114 | 4.9871327 | transmembrane protein%2C putative (DUF247)                                  |
| AT1G19380 | 0.004879264 | 4.9833193 | sugar%2C putative (DUF1195)                                                 |
| AT5G40180 | 0.028606957 | 4.9817795 | Pmr5/Cas1p GDSL/SGNH-like acyl-esterase family protein                      |
| AT4G25707 | 0.038684191 | 4.9675321 | splicing factor 3A subunit                                                  |
| AT1G66160 | 0.004991840 | 4.9660177 | CYS%2C MET%2C PRO%2C and GLY protein 1                                      |
| AT5G46470 | 0.007659913 | 4.9648348 | disease resistance protein (TIR-NBS-LRR class) family                       |
| AT2G08585 | 0.018390682 | 4.9488524 | NA                                                                          |
| AT2G38870 | 0.009289108 | 4.9430533 | Serine protease inhibitor%2C potato inhibitor I-type family protein         |
| AT1G32928 | 0.000333034 | 4.942716  | Avr9/Cf-9 rapidly elicited protein                                          |



|           |             |           |                                                                                                 |
|-----------|-------------|-----------|-------------------------------------------------------------------------------------------------|
| AT5G61600 | 0.002062871 | 4.9401017 | ethylene response factor 104                                                                    |
| AT1G22280 | 0.000655606 | 4.9154028 | phytochrome-associated protein phosphatase type 2C                                              |
| AT2G15042 | 0.009386956 | 4.9080074 | Leucine-rich repeat (LRR) family protein                                                        |
| AT1G66170 | 0.005246626 | 4.8741683 | RING/FYVE/PHD zinc finger superfamily protein                                                   |
| AT2G23320 | 0.002166848 | 4.8690287 | WRKY DNA-binding protein 15                                                                     |
| AT1G73540 | 0.000453533 | 4.8636345 | nudix hydrolase homolog 21                                                                      |
| AT2G40000 | 0.006790765 | 4.863451  | ortholog of sugar beet HS1 PRO-1 2                                                              |
| AT1G72940 | 0.012272155 | 4.8626264 | Toll-Interleukin-Resistance (TIR) domain-containing protein                                     |
| AT2G46440 | 0.003106621 | 4.8550184 | cyclic nucleotide-gated channels                                                                |
| AT5G24600 | 0.006129162 | 4.8463944 | TRP-like ion channel protein (Protein of unknown function%2C DUF599)                            |
| AT3G19970 | 0.003368834 | 4.844663  | alpha/beta-Hydrolases superfamily protein                                                       |
| AT4G38830 | 0.001408162 | 4.8436482 | cysteine-rich RLK (RECEPTOR-like protein kinase) 26                                             |
| AT2G42350 | 0.001978711 | 4.8436243 | RING/U-box superfamily protein                                                                  |
| AT4G26120 | 0.000147228 | 4.8404096 | Ankyrin repeat family protein / BTB/POZ domain-containing protein                               |
| AT5G49850 | 0.040063258 | 4.8339447 | Mannose-binding lectin superfamily protein                                                      |
| AT5G58430 | 0.002808175 | 4.8336448 | exocyst subunit exo70 family protein B1                                                         |
| AT1G63830 | 0.002373766 | 4.8330352 | PLAC8 family protein                                                                            |
| AT1G15890 | 0.000075298 | 4.820951  | Disease resistance protein (CC-NBS-LRR class) family                                            |
| AT3G51660 | 0.017853775 | 4.80466   | Tautomerase/MIF superfamily protein                                                             |
| AT5G14930 | 0.009402820 | 4.7990109 | senescence-associated gene 101                                                                  |
| AT5G16170 | 0.015417394 | 4.7822118 | Core-2/I-branching beta-1%2C6-N-acetylglucosaminyltransferase family protein                    |
| AT1G67060 | 0.003062836 | 4.7731764 | peptidase M50B-like protein                                                                     |
| AT4G13820 | 0.002337354 | 4.7704731 | Leucine-rich repeat (LRR) family protein                                                        |
| AT1G28190 | 0.012062323 | 4.7668905 | hypothetical protein                                                                            |
| AT1G03220 | 0.000083578 | 4.764413  | Eukaryotic aspartyl protease family protein                                                     |
| AT3G22370 | 0.012287434 | 4.7635663 | alternative oxidase 1A                                                                          |
| AT1G15190 | 0.047178148 | 4.7432112 | Fasciclin-like arabinogalactan family protein                                                   |
| AT5G01050 | 0.000441787 | 4.7151321 | Laccase/Diphenol oxidase family protein                                                         |
| AT3G63350 | 0.044281915 | 4.7108851 | winged-helix DNA-binding transcription factor family protein                                    |
| AT3G01840 | 0.029239983 | 4.6926554 | Protein kinase superfamily protein                                                              |
| AT1G78850 | 0.018214411 | 4.6851696 | D-mannose binding lectin protein with Apple-like carbohydrate-binding domain-containing protein |
| AT4G16960 | 0.043945151 | 4.6759998 | disease resistance protein (TIR-NBS-LRR class)                                                  |
| AT4G19920 | 0.015931119 | 4.6677015 | Toll-Interleukin-Resistance (TIR) domain family protein                                         |

|           |             |           |                                                          |
|-----------|-------------|-----------|----------------------------------------------------------|
| AT1G14420 | 0.018139594 | 4.6671332 | Pectate lyase family protein                             |
| AT3G03855 | 0.000815653 | 4.658968  | NA                                                       |
| AT1G65845 | 0.005612713 | 4.6579497 | transmembrane protein                                    |
| AT1G25370 | 0.018521486 | 4.6574073 | hypothetical protein (DUF1639)                           |
| AT1G18740 | 0.019218207 | 4.6479661 | ROH1%2C putative (DUF793)                                |
| AT3G22060 | 0.000183083 | 4.6387627 | Receptor-like protein kinase-related family protein      |
| AT5G66850 | 0.003879402 | 4.6339274 | mitogen-activated protein kinase kinase kinase 5         |
| AT3G46280 | 0.006984298 | 4.6290075 | kinase-like protein                                      |
| AT1G23830 | 0.017983772 | 4.6185631 | transmembrane protein                                    |
| AT4G27970 | 0.011676153 | 4.6067678 | SLAC1 homologue 2                                        |
| AT3G18690 | 0.005467130 | 4.5955897 | MAP kinase substrate 1                                   |
| AT5G42050 | 0.016255246 | 4.5893526 | DCD (Development and Cell Death) domain protein          |
| AT1G10040 | 0.019041949 | 4.573506  | alpha/beta-Hydrolases superfamily protein                |
| AT3G19580 | 0.015329915 | 4.5728585 | zinc-finger protein 2                                    |
| AT2G41835 | 0.000883710 | 4.5713289 | zinc finger (C2H2 type%2C AN1-like) family protein       |
| AT2G09225 | 0.004527960 | 4.5645136 | NA                                                       |
| AT4G23270 | 0.001799436 | 4.5591463 | cysteine-rich RLK (RECEPTOR-like protein kinase) 19      |
| AT1G70740 | 0.004258111 | 4.5571029 | Protein kinase superfamily protein                       |
| AT2G36210 | 0.003894309 | 4.5360955 | SAUR-like auxin-responsive protein family                |
| AT3G04210 | 0.003108386 | 4.5245536 | Disease resistance protein (TIR-NBS class)               |
| AT2G41640 | 0.015349333 | 4.5225047 | Glycosyltransferase family 61 protein                    |
| AT3G47570 | 0.000694320 | 4.5220234 | Leucine-rich repeat protein kinase family protein        |
| AT5G66630 | 0.000010143 | 4.5191689 | DA1-related protein 5                                    |
| AT3G45440 | 0.033321613 | 4.5103053 | Concanavalin A-like lectin protein kinase family protein |
| AT5G57035 | 0.008391546 | 4.5076832 | U-box domain-containing protein kinase family protein    |
| AT4G17615 | 0.004345752 | 4.4941678 | calcineurin B-like protein 1                             |
| AT1G11200 | 0.009176675 | 4.4924237 | organic solute transporter ostalpha protein (DUF300)     |
| AT5G46710 | 0.007474605 | 4.4910415 | PLATZ transcription factor family protein                |
| AT5G17680 | 0.000481537 | 4.48918   | disease resistance protein (TIR-NBS-LRR class)           |
| AT4G35380 | 0.013785807 | 4.4884038 | SEC7-like guanine nucleotide exchange family protein     |
| AT2G39210 | 0.007732626 | 4.4844384 | Major facilitator superfamily protein                    |
| AT4G14610 | 0.009169619 | 4.4683465 | NA                                                       |
| AT1G29290 | 0.000108796 | 4.464911  | B-cell lymphoma 6 protein                                |

|           |             |           |                                                                |
|-----------|-------------|-----------|----------------------------------------------------------------|
| AT5G40540 | 0.001275177 | 4.4609174 | Protein kinase superfamily protein                             |
| AT5G44820 | 0.041106969 | 4.4583977 | Nucleotide-diphospho-sugar transferase family protein          |
| AT1G16160 | 0.017464472 | 4.4572267 | wall associated kinase-like 5                                  |
| AT5G52830 | 0.008013841 | 4.4488239 | WRKY DNA-binding protein 27                                    |
| AT1G06140 | 0.000021737 | 4.426078  | Pentatricopeptide repeat (PPR) superfamily protein             |
| AT2G43620 | 0.003622592 | 4.4226808 | Chitinase family protein                                       |
| AT2G19710 | 0.007103343 | 4.4198753 | Regulator of Vps4 activity in the MVB pathway protein          |
| AT5G11650 | 0.000869859 | 4.4195146 | alpha/beta-Hydrolases superfamily protein                      |
| AT5G35580 | 0.038622229 | 4.4193787 | Protein kinase superfamily protein                             |
| AT5G55090 | 0.000879128 | 4.3876598 | mitogen-activated protein kinase kinase kinase 15              |
| AT1G68340 | 0.001357866 | 4.3822139 | hypothetical protein (DUF1639)                                 |
| AT1G13530 | 0.029336050 | 4.3615222 | hypothetical protein (DUF1262)                                 |
| AT2G31230 | 0.001022972 | 4.3583959 | ethylene-responsive element binding factor 15                  |
| AT3G51920 | 0.012515764 | 4.3567499 | calmodulin 9                                                   |
| AT5G18400 | 0.000541113 | 4.344134  | Cytokine-induced anti-apoptosis inhibitor 1%2C Fe-S biogenesis |
| AT1G67880 | 0.011484570 | 4.3387858 | beta-1%2C4-N-acetylglucosaminyltransferase family protein      |
| AT2G17120 | 0.000035691 | 4.3291905 | lysm domain GPI-anchored protein 2 precursor                   |
| AT3G13435 | 0.018002811 | 4.3281406 | transmembrane protein                                          |
| AT3G20510 | 0.004182923 | 4.3141445 | Transmembrane proteins 14C                                     |
| AT3G22260 | 0.014258517 | 4.2733306 | Cysteine proteinases superfamily protein                       |
| AT4G24110 | 0.007409099 | 4.2716153 | NADP-specific glutamate dehydrogenase                          |
| AT5G42440 | 0.000261324 | 4.2679877 | Protein kinase superfamily protein                             |
| AT2G35730 | 0.033650333 | 4.2446668 | Heavy metal transport/detoxification superfamily protein       |
| AT4G25390 | 0.000364091 | 4.2434815 | Protein kinase superfamily protein                             |
| AT4G33985 | 0.008285484 | 4.2412174 | membrane insertase%2C putative (DUF1685)                       |
| AT2G17705 | 0.003964955 | 4.2315444 | methionine-S-oxide reductase                                   |
| AT2G03530 | 0.000534411 | 4.2310821 | ureide permease 2                                              |
| AT4G22780 | 0.006914004 | 4.2202326 | ACT domain repeat 7                                            |
| AT5G25440 | 0.000065397 | 4.2173587 | Protein kinase superfamily protein                             |
| AT1G31130 | 0.027521856 | 4.2101234 | polyadenylate-binding protein 1-B-binding protein              |
| AT4G09570 | 0.000381936 | 4.1941874 | calcium-dependent protein kinase 4                             |
| AT2G26410 | 0.013001387 | 4.1908906 | IQ-domain 4                                                    |
| AT3G50480 | 0.001762313 | 4.182831  | homolog of RPW8 4                                              |

|           |             |           |                                                                               |
|-----------|-------------|-----------|-------------------------------------------------------------------------------|
| AT2G30690 | 0.020774797 | 4.1815342 | lateral signaling target-like protein (Protein of unknown function%2C DUF593) |
| AT1G33030 | 0.002902675 | 4.1793551 | O-methyltransferase family protein                                            |
| AT2G41010 | 0.001986311 | 4.1780459 | calmodulin (CAM)-binding protein of 25 kDa                                    |
| AT3G44630 | 0.008002107 | 4.1778127 | Disease resistance protein (TIR-NBS-LRR class) family                         |
| AT2G07715 | 0.033375723 | 4.1657456 | Nucleic acid-binding%2C OB-fold-like protein                                  |
| AT5G39000 | 0.010279473 | 4.1535298 | Malectin/receptor-like protein kinase family protein                          |
| AT5G61090 | 0.039704629 | 4.150706  | Polynucleotidyl transferase%2C ribonuclease H-like superfamily protein        |
| AT3G09032 | 0.001082616 | 4.1496018 | josephin-like protein                                                         |
| AT5G20230 | 0.001888303 | 4.1449384 | blue-copper-binding protein                                                   |
| AT2G40270 | 0.016479470 | 4.144318  | Protein kinase family protein                                                 |
| AT5G19230 | 0.001777685 | 4.1396312 | Glycoprotein membrane precursor GPI-anchored                                  |
| AT3G08760 | 0.008279079 | 4.1133268 | Protein kinase superfamily protein                                            |
| AT2G47130 | 0.002093928 | 4.1071707 | NAD(P)-binding Rossmann-fold superfamily protein                              |
| AT5G01640 | 0.010699966 | 4.1038353 | prenylated RAB acceptor 1.B5                                                  |
| AT2G16870 | 0.000924908 | 4.102913  | Disease resistance protein (TIR-NBS-LRR class) family                         |
| AT4G35600 | 0.000149362 | 4.093629  | Protein kinase superfamily protein                                            |
| AT2G24610 | 0.000127748 | 4.0927284 | cyclic nucleotide-gated channel 14                                            |
| AT1G69840 | 0.001882680 | 4.0919246 | SPFH/Band 7/PHB domain-containing membrane-associated protein family          |
| AT3G55450 | 0.000197086 | 4.0865189 | PBS1-like 1                                                                   |
| AT1G63740 | 0.005543285 | 4.0841945 | Disease resistance protein (TIR-NBS-LRR class) family                         |
| AT3G60415 | 0.030008684 | 4.0794057 | phosphoglycerate mutase family protein                                        |
| AT1G35610 | 0.046234736 | 4.0694031 | Cysteine/Histidine-rich C1 domain family protein                              |
| AT5G66900 | 0.000054509 | 4.0683986 | Disease resistance protein (CC-NBS-LRR class) family                          |
| AT1G03730 | 0.001037466 | 4.0602208 | pyrroline-5-carboxylate reductase                                             |
| AT5G20480 | 0.005758506 | 4.0575147 | EF-TU receptor                                                                |
| AT3G13090 | 0.015917811 | 4.0416595 | multidrug resistance-associated protein 8                                     |
| AT2G32240 | 0.000113462 | 4.0415994 | early endosome antigen                                                        |
| AT2G14290 | 0.007844560 | 4.025478  | LL-diaminopimelate protein (DUF295)                                           |
| AT5G61010 | 0.000357017 | 4.0140854 | exocyst subunit exo70 family protein E2                                       |
| AT5G01950 | 0.014816014 | 4.0126725 | Leucine-rich repeat protein kinase family protein                             |
| AT5G24590 | 0.004115287 | 4.0081564 | TCV-interacting protein                                                       |
| AT3G26680 | 0.000272975 | 4.0041009 | DNA repair metallo-beta-lactamase family protein                              |
| AT5G11290 | 0.022423539 | 3.982263  | transmembrane protein%2C putative (DUF247)                                    |

|           |             |           |                                                                                           |
|-----------|-------------|-----------|-------------------------------------------------------------------------------------------|
| AT1G76700 | 0.002943087 | 3.9809821 | DNAJ heat shock N-terminal domain-containing protein                                      |
| AT4G25810 | 0.017411218 | 3.979502  | xyloglucan endotransglycosylase 6                                                         |
| AT3G44720 | 0.013740595 | 3.9777558 | arogenate dehydratase 4                                                                   |
| AT2G22470 | 0.004377205 | 3.9543969 | arabinogalactan protein 2                                                                 |
| AT3G21080 | 0.009736793 | 3.9510895 | ABC transporter-like protein                                                              |
| AT4G17900 | 0.001702888 | 3.9486151 | PLATZ transcription factor family protein                                                 |
| AT5G64750 | 0.014892512 | 3.9422446 | Integrase-type DNA-binding superfamily protein                                            |
| AT5G11920 | 0.035230705 | 3.9408085 | 6-%261-fructan exohydrolase                                                               |
| AT1G31540 | 0.007828346 | 3.9250847 | Disease resistance protein (TIR-NBS-LRR class) family                                     |
| AT1G74330 | 0.004422620 | 3.911379  | Protein kinase superfamily protein                                                        |
| AT1G30420 | 0.010069607 | 3.9049632 | multidrug resistance-associated protein 12                                                |
| AT5G62570 | 0.000001267 | 3.8960729 | Calmodulin binding protein-like protein                                                   |
| AT1G78955 | 0.006908184 | 3.8896035 | camelliol C synthase 1                                                                    |
| AT3G62780 | 0.021236292 | 3.8891065 | Calcium-dependent lipid-binding (CaLB domain) family protein                              |
| AT1G25220 | 0.034131636 | 3.8875963 | anthranilate synthase beta subunit 1                                                      |
| AT2G34930 | 0.024837904 | 3.8830877 | disease resistance family protein / LRR family protein                                    |
| AT4G04695 | 0.002835061 | 3.8789378 | calcium-dependent protein kinase 31                                                       |
| AT1G25400 | 0.001678615 | 3.87631   | transmembrane protein                                                                     |
| AT1G80610 | 0.001706914 | 3.8747726 | hypothetical protein                                                                      |
| AT3G10640 | 0.000002946 | 3.8729973 | SNF7 family protein                                                                       |
| AT1G51880 | 0.001860307 | 3.8721591 | root hair specific 6                                                                      |
| AT2G44290 | 0.003649859 | 3.8678676 | Bifunctional inhibitor/lipid-transfer protein/seed storage 2S albumin superfamily protein |
| AT1G34750 | 0.000163046 | 3.8674336 | Protein phosphatase 2C family protein                                                     |
| AT4G11900 | 0.002500239 | 3.8611055 | S-locus lectin protein kinase family protein                                              |
| AT1G14455 | 0.023914563 | 3.8484222 | hypothetical protein                                                                      |
| AT1G73080 | 0.017214325 | 3.846635  | PEP1 receptor 1                                                                           |
| AT4G28400 | 0.002428931 | 3.8415174 | Protein phosphatase 2C family protein                                                     |
| AT5G38990 | 0.001954096 | 3.8399549 | Malectin/receptor-like protein kinase family protein                                      |
| AT3G45638 | 0.002082550 | 3.832028  | NA                                                                                        |
| AT4G38545 | 0.007010052 | 3.8219824 | NA                                                                                        |
| AT3G53150 | 0.024964100 | 3.8211008 | UDP-glucosyl transferase 73D1                                                             |
| AT5G11000 | 0.002176018 | 3.8136208 | hypothetical protein (DUF868)                                                             |
| AT5G02630 | 0.004411384 | 3.8118464 | Lung seven transmembrane receptor family protein                                          |

|           |             |           |                                                                                 |
|-----------|-------------|-----------|---------------------------------------------------------------------------------|
| AT1G77500 | 0.000793457 | 3.8059624 | DUF630 family protein%2C putative (DUF630 and DUF632)                           |
| AT3G49350 | 0.000681103 | 3.8056569 | Ypt/Rab-GAP domain of gyp1p superfamily protein                                 |
| AT3G16565 | 0.017113713 | 3.8041738 | threonyl and alanyl tRNA synthetase second additional domain-containing protein |
| AT3G15210 | 0.002858694 | 3.7796071 | ethylene responsive element binding factor 4                                    |
| AT4G39230 | 0.000003488 | 3.7618492 | NmrA-like negative transcriptional regulator family protein                     |
| AT4G09405 | 0.015962609 | 3.7565945 | NA                                                                              |
| AT3G28450 | 0.009548223 | 3.7283872 | Leucine-rich repeat protein kinase family protein                               |
| AT5G04870 | 0.000973716 | 3.7277065 | calcium dependent protein kinase 1                                              |
| AT4G23130 | 0.016828222 | 3.7238907 | cysteine-rich RLK (RECEPTOR-like protein kinase) 5                              |
| AT4G16350 | 0.018387020 | 3.7025482 | calcineurin B-like protein 6                                                    |
| AT4G16600 | 0.015338446 | 3.7005751 | Nucleotide-diphospho-sugar transferases superfamily protein                     |
| AT4G34180 | 0.000286771 | 3.7004924 | Cyclase family protein                                                          |
| AT3G25221 | 0.018094240 | 3.6981396 | hypothetical protein                                                            |
| AT4G23015 | 0.016723356 | 3.69168   | transmembrane protein                                                           |
| AT5G52050 | 0.002459022 | 3.6912561 | MATE efflux family protein                                                      |
| AT4G24380 | 0.000997177 | 3.6855046 | dihydrofolate reductase                                                         |
| AT4G33040 | 0.004559147 | 3.6838103 | Thioredoxin superfamily protein                                                 |
| AT1G20515 | 0.007145872 | 3.6774519 | NA                                                                              |
| AT4G32020 | 0.000726613 | 3.6739309 | serine/arginine repetitive matrix-like protein                                  |
| AT2G02860 | 0.013330956 | 3.6714301 | sucrose transporter 2                                                           |
| AT1G02405 | 0.043733610 | 3.6665532 | proline-rich family protein                                                     |
| AT4G14220 | 0.003248122 | 3.6625532 | RING-H2 group F1A                                                               |
| AT5G05850 | 0.002901044 | 3.6625185 | plant intracellular ras group-related LRR 1                                     |
| AT5G43520 | 0.043516288 | 3.6615158 | Cysteine/Histidine-rich C1 domain family protein                                |
| AT5G08790 | 0.000150892 | 3.6551196 | NAC (No Apical Meristem) domain transcriptional regulator superfamily protein   |
| AT5G08240 | 0.004891739 | 3.6420375 | transmembrane protein                                                           |
| AT3G57550 | 0.002306012 | 3.6382126 | guanylate kinase                                                                |
| AT3G50140 | 0.018475440 | 3.6314876 | transmembrane protein%2C putative (DUF247)                                      |
| AT1G61420 | 0.001027109 | 3.6262921 | S-locus lectin protein kinase family protein                                    |
| AT3G05320 | 0.008705731 | 3.6102104 | O-fucosyltransferase family protein                                             |
| AT1G65500 | 0.010970928 | 3.6010442 | transmembrane protein                                                           |
| AT1G59620 | 0.007888818 | 3.594538  | Disease resistance protein (CC-NBS-LRR class) family                            |
| AT2G04040 | 0.012691475 | 3.5940061 | MATE efflux family protein                                                      |

|           |             |           |                                                          |
|-----------|-------------|-----------|----------------------------------------------------------|
| AT4G33430 | 0.001827487 | 3.5911065 | BRI1-associated receptor kinase                          |
| AT1G76980 | 0.000057508 | 3.5856403 | patatin-like phospholipase domain protein                |
| AT4G28703 | 0.024164388 | 3.5841858 | RmlC-like cupins superfamily protein                     |
| AT5G40460 | 0.020799036 | 3.5830792 | cyclin-dependent kinase inhibitor SMR3-like protein      |
| AT5G09865 | 0.040668793 | 3.5796289 | NA                                                       |
| AT5G66480 | 0.037737729 | 3.5783345 | bacteriophage N4 adsorption B protein                    |
| AT1G58410 | 0.016190647 | 3.5780091 | Disease resistance protein (CC-NBS-LRR class) family     |
| AT1G53430 | 0.000480079 | 3.5760091 | Leucine-rich repeat transmembrane protein kinase         |
| AT1G07963 | 0.030325666 | 3.5694822 | NA                                                       |
| AT1G27110 | 0.007844362 | 3.565918  | Tetratricopeptide repeat (TPR)-like superfamily protein  |
| AT1G10990 | 0.033932376 | 3.5621803 | transmembrane protein                                    |
| AT1G15530 | 0.002124991 | 3.5550234 | Concanavalin A-like lectin protein kinase family protein |
| AT4G20860 | 0.007188560 | 3.5524437 | FAD-binding Berberine family protein                     |
| AT3G57760 | 0.000030963 | 3.5519901 | Protein kinase superfamily protein                       |
| AT1G19415 | 0.025762596 | 3.5491361 | NA                                                       |
| AT1G66480 | 0.027181023 | 3.5435369 | plastid movement impaired 2                              |
| AT5G19221 | 0.003824220 | 3.5433842 | NA                                                       |
| AT2G04555 | 0.041368070 | 3.543362  | NA                                                       |
| AT5G57560 | 0.005903609 | 3.5390744 | Xyloglucan endotransglucosylase/hydrolase family protein |
| AT1G75020 | 0.002679702 | 3.5304063 | lysophosphatidyl acyltransferase 4                       |
| AT1G64400 | 0.000413355 | 3.5300083 | AMP-dependent synthetase and ligase family protein       |
| AT5G43620 | 0.000182356 | 3.5260353 | Pre-mRNA cleavage complex II                             |
| AT5G35205 | 0.018354903 | 3.5183333 | NA                                                       |
| AT1G20300 | 0.009081418 | 3.5129748 | Pentatricopeptide repeat (PPR) superfamily protein       |
| AT4G33920 | 0.014658404 | 3.5124544 | Protein phosphatase 2C family protein                    |
| AT3G02880 | 0.001112570 | 3.5121411 | Leucine-rich repeat protein kinase family protein        |
| AT1G07128 | 0.011433386 | 3.5075797 | NA                                                       |
| AT4G30290 | 0.025763167 | 3.5071537 | xyloglucan endotransglucosylase/hydrolase 19             |
| AT4G37030 | 0.002378671 | 3.4898334 | membrane protein                                         |
| AT3G25900 | 0.002078614 | 3.4823668 | Homocysteine S-methyltransferase family protein          |
| AT4G30850 | 0.010287822 | 3.4780355 | heptahelical transmembrane protein2                      |
| AT3G07960 | 0.001531587 | 3.4763407 | Phosphatidylinositol-4-phosphate 5-kinase family protein |
| AT1G67856 | 0.001138452 | 3.4724735 | RING/U-box superfamily protein                           |

|           |             |           |                                                                                           |
|-----------|-------------|-----------|-------------------------------------------------------------------------------------------|
| AT3G59310 | 0.005835043 | 3.4712219 | solute carrier family 35 protein (DUF914)                                                 |
| AT1G77890 | 0.000045731 | 3.4705967 | DNA-directed RNA polymerase II protein                                                    |
| AT2G27080 | 0.018609489 | 3.4662976 | Late embryogenesis abundant (LEA) hydroxyproline-rich glycoprotein family                 |
| AT3G10300 | 0.006303302 | 3.4631378 | Calcium-binding EF-hand family protein                                                    |
| AT4G05910 | 0.032040256 | 3.4612411 | NA                                                                                        |
| AT5G11250 | 0.033778529 | 3.4549941 | Disease resistance protein (TIR-NBS-LRR class)                                            |
| AT1G02880 | 0.019486591 | 3.4513209 | thiamin pyrophosphokinase1                                                                |
| AT2G39530 | 0.010417938 | 3.4488247 | Uncharacterized protein family (UPF0497)                                                  |
| AT2G22300 | 0.005224642 | 3.4476523 | signal responsive 1                                                                       |
| AT1G73550 | 0.004779353 | 3.447044  | Bifunctional inhibitor/lipid-transfer protein/seed storage 2S albumin superfamily protein |
| AT1G03230 | 0.004269381 | 3.4403549 | Eukaryotic aspartyl protease family protein                                               |
| AT5G15730 | 0.002522139 | 3.4334202 | Protein kinase superfamily protein                                                        |
| AT1G21320 | 0.001029592 | 3.4219942 | nucleic acid/nucleotide binding protein                                                   |
| AT4G35110 | 0.000095589 | 3.4187438 | phospholipase-like protein (PEARLI 4) family protein                                      |
| AT1G14780 | 0.007784590 | 3.4089201 | MAC/Perforin domain-containing protein                                                    |
| AT4G18950 | 0.000178956 | 3.4079442 | Integrin-linked protein kinase family                                                     |
| AT3G04110 | 0.010556765 | 3.3998574 | glutamate receptor 1.1                                                                    |
| AT4G30370 | 0.022780689 | 3.3912303 | RING/U-box superfamily protein                                                            |
| AT2G46160 | 0.035070072 | 3.3891988 | RING/U-box superfamily protein                                                            |
| AT3G45660 | 0.005448726 | 3.3850509 | Major facilitator superfamily protein                                                     |
| AT3G22930 | 0.013031450 | 3.3843823 | calmodulin-like 11                                                                        |
| AT3G57540 | 0.008434179 | 3.3831333 | Remorin family protein                                                                    |
| AT3G57630 | 0.002241060 | 3.3814999 | exostosin family protein                                                                  |
| AT1G70530 | 0.001275096 | 3.3806537 | cysteine-rich RLK (RECEPTOR-like protein kinase) 3                                        |
| AT4G11230 | 0.005211633 | 3.375938  | Riboflavin synthase-like superfamily protein                                              |
| AT4G11500 | 0.037684739 | 3.3730445 | NA                                                                                        |
| AT3G61760 | 0.040831795 | 3.3703176 | DYNAMIN-like 1B                                                                           |
| AT1G76650 | 0.017134086 | 3.3699888 | calmodulin-like 38                                                                        |
| AT3G25780 | 0.023450070 | 3.369542  | allene oxide cyclase 3                                                                    |
| AT2G32930 | 0.000165097 | 3.3691566 | zinc finger nuclease 2                                                                    |
| AT5G44870 | 0.000662954 | 3.3684491 | Disease resistance protein (TIR-NBS-LRR class) family                                     |
| AT1G76360 | 0.000116480 | 3.3677504 | Protein kinase superfamily protein                                                        |
| AT5G45280 | 0.008865940 | 3.3615274 | Pectinacetylesterase family protein                                                       |



|           |             |           |                                                                         |
|-----------|-------------|-----------|-------------------------------------------------------------------------|
| AT5G45080 | 0.003803893 | 3.3578665 | phloem protein 2-A6                                                     |
| AT2G13650 | 0.001092165 | 3.3569398 | golgi nucleotide sugar transporter 1                                    |
| AT5G54810 | 0.012842725 | 3.3553854 | tryptophan synthase beta-subunit 1                                      |
| AT1G74450 | 0.012490845 | 3.3482775 | BPS1-like protein (DUF793)                                              |
| AT5G20400 | 0.010465108 | 3.3481061 | 2-oxoglutarate (2OG) and Fe(II)-dependent oxygenase superfamily protein |
| AT1G64710 | 0.010279608 | 3.3402587 | GroES-like zinc-binding alcohol dehydrogenase family protein            |
| AT3G12740 | 0.003545438 | 3.3373601 | ALA-interacting subunit 1                                               |
| AT5G39785 | 0.000837890 | 3.3359027 | hypothetical protein (DUF1666)                                          |
| AT5G49770 | 0.029599019 | 3.334694  | Leucine-rich repeat protein kinase family protein                       |
| AT2G32800 | 0.000029515 | 3.3332121 | protein kinase family protein                                           |
| AT1G63860 | 0.004126746 | 3.3308984 | Disease resistance protein (TIR-NBS-LRR class) family                   |
| AT1G64280 | 0.001956927 | 3.3248799 | regulatory protein (NPR1)                                               |
| AT5G66310 | 0.006335439 | 3.3235045 | ATP binding microtubule motor family protein                            |
| AT3G25882 | 0.040405456 | 3.3231599 | NIM1-interacting 2                                                      |
| AT5G60800 | 0.009676975 | 3.3200101 | Heavy metal transport/detoxification superfamily protein                |
| AT1G53440 | 0.001672388 | 3.3184432 | Leucine-rich repeat transmembrane protein kinase                        |
| AT2G39400 | 0.008429122 | 3.3167753 | alpha/beta-Hydrolases superfamily protein                               |
| AT3G13650 | 0.043730731 | 3.3119042 | Disease resistance-responsive (dirigent-like protein) family protein    |
| AT1G69430 | 0.006298562 | 3.3104996 | Son of sevenless protein                                                |
| AT3G50800 | 0.011361750 | 3.3084926 | hypothetical protein                                                    |
| AT4G23250 | 0.037571034 | 3.3066912 | cysteine-rich receptor-like protein kinase 17                           |
| AT3G57280 | 0.000057969 | 3.3039151 | Transmembrane proteins 14C                                              |
| AT5G01120 | 0.026554147 | 3.3013265 | hypothetical protein (DUF674)                                           |
| AT3G57330 | 0.008397549 | 3.3011472 | autoinhibited Ca <sup>2+</sup> -ATPase 11                               |
| AT5G41180 | 0.005493120 | 3.2985414 | leucine-rich repeat transmembrane protein kinase family protein         |
| AT5G62020 | 0.001139984 | 3.2935086 | heat shock transcription factor B2A                                     |
| AT5G11970 | 0.004078255 | 3.2928225 | ABC family ABC transporter%2C putative (DUF3511)                        |
| AT3G07580 | 0.029751069 | 3.2847001 | hypothetical protein                                                    |
| AT3G05200 | 0.000350735 | 3.2843541 | RING/U-box superfamily protein                                          |
| AT3G51450 | 0.026575803 | 3.2842505 | Calcium-dependent phosphotriesterase superfamily protein                |
| AT4G25900 | 0.018758660 | 3.2756656 | Galactose mutarotase-like superfamily protein                           |
| AT3G15358 | 0.021193991 | 3.2752438 | transmembrane protein                                                   |
| AT4G07960 | 0.016010428 | 3.2752263 | Cellulose-synthase-like C12                                             |

|           |             |           |                                                                                             |
|-----------|-------------|-----------|---------------------------------------------------------------------------------------------|
| AT2G44070 | 0.021492088 | 3.2745602 | NagB/RpiA/CoA transferase-like superfamily protein                                          |
| AT1G51270 | 0.002802772 | 3.2701778 | vesicle-associated protein 1-4                                                              |
| AT1G56520 | 0.000005410 | 3.2699877 | Disease resistance protein (TIR-NBS-LRR class) family                                       |
| ATMG01275 | 0.046685509 | 3.2664063 | NADH dehydrogenase 1A                                                                       |
| AT5G54850 | 0.000023464 | 3.2573973 | hexon                                                                                       |
| AT4G23570 | 0.002583825 | 3.2535215 | phosphatase-like protein                                                                    |
| AT2G02220 | 0.002854745 | 3.2460027 | phytosulfokin receptor 1                                                                    |
| AT4G26095 | 0.001089593 | 3.2410925 | NA                                                                                          |
| AT3G59880 | 0.006791750 | 3.2317854 | hypothetical protein                                                                        |
| AT2G41880 | 0.001184997 | 3.2250666 | guanylate kinase 1                                                                          |
| AT5G40920 | 0.000055975 | 3.2128466 | NA                                                                                          |
| AT3G13050 | 0.001042964 | 3.2116916 | Major facilitator superfamily protein                                                       |
| AT1G75860 | 0.017708091 | 3.2077895 | DNA ligase                                                                                  |
| AT2G39660 | 0.002866190 | 3.2044944 | botrytis-induced kinase1                                                                    |
| AT1G58807 | 0.040307415 | 3.2039109 | Disease resistance protein (CC-NBS-LRR class) family                                        |
| AT1G59124 | 0.040388644 | 3.2021549 | Disease resistance protein (CC-NBS-LRR class) family                                        |
| AT3G01290 | 0.016847298 | 3.1967937 | SPFH/Band 7/PHB domain-containing membrane-associated protein family                        |
| AT1G06840 | 0.000129301 | 3.1902097 | Leucine-rich repeat protein kinase family protein                                           |
| AT4G05010 | 0.001147994 | 3.1895094 | F-box family protein                                                                        |
| AT3G50460 | 0.018355936 | 3.1871221 | homolog of RPW8 2                                                                           |
| AT3G47540 | 0.015522352 | 3.1683583 | Chitinase family protein                                                                    |
| AT1G18980 | 0.001329950 | 3.1576323 | RmlC-like cupins superfamily protein                                                        |
| AT5G45110 | 0.002678349 | 3.1559271 | NPR1-like protein 3                                                                         |
| AT3G47480 | 0.006317448 | 3.1544629 | Calcium-binding EF-hand family protein                                                      |
| AT2G28570 | 0.009646608 | 3.1520655 | hypothetical protein                                                                        |
| AT3G15200 | 0.000488772 | 3.1489301 | Tetratricopeptide repeat (TPR)-like superfamily protein                                     |
| AT3G13430 | 0.000096857 | 3.1480733 | RING/U-box superfamily protein                                                              |
| AT2G44380 | 0.000186551 | 3.1479722 | Cysteine/Histidine-rich C1 domain family protein                                            |
| AT5G16910 | 0.010627157 | 3.1453853 | cellulose-synthase like D2                                                                  |
| AT4G30350 | 0.004243223 | 3.1422807 | Double Clp-N motif-containing P-loop nucleoside triphosphate hydrolases superfamily protein |
| AT3G25510 | 0.001103134 | 3.1289377 | disease resistance protein (TIR-NBS-LRR class) family protein                               |
| AT3G05360 | 0.022718271 | 3.1272708 | receptor like protein 30                                                                    |
| AT1G05753 | 0.010889339 | 3.1225458 | NA                                                                                          |

|           |             |           |                                                                                                 |
|-----------|-------------|-----------|-------------------------------------------------------------------------------------------------|
| AT4G00240 | 0.001312915 | 3.1199737 | phospholipase D beta 2                                                                          |
| AT4G33300 | 0.007510526 | 3.1187704 | ADR1-like 1                                                                                     |
| AT4G22980 | 0.013729969 | 3.1159802 | molybdenum cofactor sulfurase-like protein                                                      |
| AT1G09537 | 0.034668903 | 3.1127849 | NA                                                                                              |
| AT5G58160 | 0.000151695 | 3.1034037 | actin binding protein                                                                           |
| AT4G14680 | 0.022655776 | 3.1013014 | Pseudouridine synthase/archaeosine transglycosylase-like family protein                         |
| AT4G06746 | 0.020489962 | 3.098308  | related to AP2 9                                                                                |
| AT1G79245 | 0.000227271 | 3.0873422 | NA                                                                                              |
| AT1G51860 | 0.004847410 | 3.0833216 | Leucine-rich repeat protein kinase family protein                                               |
| AT4G02380 | 0.000486246 | 3.0761257 | senescence-associated gene 21                                                                   |
| AT4G25030 | 0.000893479 | 3.0738512 | Serine/Threonine-kinase                                                                         |
| AT3G53810 | 0.003824084 | 3.0619403 | Concanavalin A-like lectin protein kinase family protein                                        |
| AT4G30060 | 0.006192782 | 3.0583663 | Core-2/I-branching beta-1%2C6-N-acetylglucosaminyltransferase family protein                    |
| AT2G28940 | 0.014093212 | 3.0565848 | Protein kinase superfamily protein                                                              |
| AT5G18360 | 0.005176748 | 3.0532582 | Disease resistance protein (TIR-NBS-LRR class) family                                           |
| AT1G09867 | 0.037252205 | 3.0521659 | NA                                                                                              |
| AT1G76210 | 0.034151382 | 3.0511249 | DUF241 domain protein%2C putative (DUF241)                                                      |
| AT5G07390 | 0.011174567 | 3.0505445 | respiratory burst oxidase homolog A                                                             |
| AT1G10050 | 0.000217468 | 3.0498223 | glycosyl hydrolase family 10 protein / carbohydrate-binding domain-containing protein           |
| AT1G78830 | 0.047835283 | 3.0483944 | Curculin-like (mannose-binding) lectin family protein                                           |
| AT1G17600 | 0.029630046 | 3.0447146 | Disease resistance protein (TIR-NBS-LRR class) family                                           |
| AT3G29400 | 0.014935306 | 3.0401168 | exocyst subunit exo70 family protein E1                                                         |
| AT1G53060 | 0.000502588 | 3.0400064 | Legume lectin family protein                                                                    |
| AT1G63350 | 0.006066720 | 3.0371389 | Disease resistance protein (CC-NBS-LRR class) family                                            |
| AT5G24430 | 0.004394203 | 3.0365504 | Calcium-dependent protein kinase (CDPK) family protein                                          |
| AT2G02620 | 0.014153996 | 3.0289255 | Cysteine/Histidine-rich C1 domain family protein                                                |
| AT3G52710 | 0.000064189 | 3.0228146 | hypothetical protein                                                                            |
| AT5G03700 | 0.000216828 | 3.0094455 | D-mannose binding lectin protein with Apple-like carbohydrate-binding domain-containing protein |
| AT1G59850 | 0.037560626 | 3.0089415 | ARM repeat superfamily protein                                                                  |
| AT4G06135 | 0.037099198 | 3.0032144 | NA                                                                                              |
| AT5G25170 | 0.032425924 | 3.0009564 | PPPDE putative thiol peptidase family protein                                                   |
| AT5G60270 | 0.000366033 | 2.9991507 | Concanavalin A-like lectin protein kinase family protein                                        |
| AT5G59510 | 0.002064650 | 2.9987237 | ROTUNDIFOLIA like 5                                                                             |

|           |             |           |                                                                |
|-----------|-------------|-----------|----------------------------------------------------------------|
| AT5G47070 | 0.002487260 | 2.9971718 | Protein kinase superfamily protein                             |
| AT4G39320 | 0.026846118 | 2.9957287 | microtubule-associated protein-like protein                    |
| AT1G69270 | 0.004590696 | 2.9897039 | receptor-like protein kinase 1                                 |
| AT2G27310 | 0.030167816 | 2.9885291 | F-box family protein                                           |
| AT3G46330 | 0.041572904 | 2.9884616 | Leucine-rich repeat protein kinase family protein              |
| AT2G46330 | 0.000011020 | 2.9846521 | arabinogalactan protein 16                                     |
| AT1G05630 | 0.001367691 | 2.9784384 | Endonuclease/exonuclease/phosphatase family protein            |
| AT5G37770 | 0.002014309 | 2.9782605 | EF hand calcium-binding protein family                         |
| AT1G04047 | 0.047400761 | 2.9776409 | NA                                                             |
| AT3G28930 | 0.042365462 | 2.9682621 | AIG2-like (avirulence induced gene) family protein             |
| AT3G27560 | 0.005061545 | 2.9663577 | Protein kinase superfamily protein                             |
| AT1G61820 | 0.038647042 | 2.9620919 | beta glucosidase 46                                            |
| AT5G18490 | 0.007433732 | 2.9595741 | vacuolar sorting-associated protein (DUF946)                   |
| AT1G13590 | 0.008249444 | 2.9475192 | phytosulfokine 1 precursor                                     |
| AT3G14870 | 0.006632254 | 2.9454193 | hypothetical protein (DUF641)                                  |
| AT5G41170 | 0.001749236 | 2.9431793 | Pentatricopeptide repeat (PPR-like) superfamily protein        |
| AT2G23420 | 0.004796202 | 2.9414251 | nicotinate phosphoribosyltransferase 2                         |
| AT4G13510 | 0.000450551 | 2.9353416 | ammonium transporter 1%3B1                                     |
| AT5G27760 | 0.000078728 | 2.934386  | Hypoxia-responsive family protein                              |
| AT2G11520 | 0.000223628 | 2.9216781 | calmodulin-binding receptor-like cytoplasmic kinase 3          |
| AT2G43120 | 0.032226300 | 2.9193761 | RmlC-like cupins superfamily protein                           |
| AT4G08500 | 0.000216642 | 2.9132664 | MAPK/ERK kinase kinase 1                                       |
| AT3G56400 | 0.015858649 | 2.9105652 | WRKY DNA-binding protein 70                                    |
| AT2G05940 | 0.031714594 | 2.9099171 | Protein kinase superfamily protein                             |
| AT5G06560 | 0.000001542 | 2.9008206 | myosin-binding protein (Protein of unknown function%2C DUF593) |
| AT2G34650 | 0.008567420 | 2.8948301 | Protein kinase superfamily protein                             |
| AT2G23200 | 0.000046342 | 2.8878349 | Protein kinase superfamily protein                             |
| AT1G31350 | 0.023134790 | 2.8866509 | KAR-UP F-box 1                                                 |
| AT3G62150 | 0.010519166 | 2.8865277 | P-glycoprotein 21                                              |
| AT1G15430 | 0.003327129 | 2.878503  | hypothetical protein (DUF1644)                                 |
| AT1G70520 | 0.008702438 | 2.8776586 | cysteine-rich RLK (RECEPTOR-like protein kinase) 2             |
| AT1G59740 | 0.008394481 | 2.874554  | Major facilitator superfamily protein                          |
| AT4G18890 | 0.014795273 | 2.8563876 | BES1/BZR1 homolog 3                                            |

|           |             |           |                                                                          |
|-----------|-------------|-----------|--------------------------------------------------------------------------|
| AT4G33440 | 0.017327718 | 2.8408998 | Pectin lyase-like superfamily protein                                    |
| AT4G20460 | 0.001166487 | 2.8388886 | NAD(P)-binding Rossmann-fold superfamily protein                         |
| AT2G17480 | 0.024611770 | 2.8354781 | Seven transmembrane MLO family protein                                   |
| AT5G56580 | 0.000597205 | 2.8313346 | MAP kinase kinase 6                                                      |
| AT5G20050 | 0.007016317 | 2.8292035 | Protein kinase superfamily protein                                       |
| AT2G30870 | 0.008555404 | 2.8222925 | glutathione S-transferase PHI 10                                         |
| AT5G54060 | 0.021453584 | 2.8183947 | UDP-glucose:flavonoid 3-o-glucosyltransferase                            |
| AT1G20350 | 0.006001888 | 2.8182004 | translocase inner membrane subunit 17-1                                  |
| AT5G13200 | 0.000046503 | 2.8091927 | GRAM domain family protein                                               |
| AT4G04960 | 0.024986381 | 2.8074789 | Concanavalin A-like lectin protein kinase family protein                 |
| AT1G12360 | 0.000035041 | 2.8069476 | Sec1/munc18-like (SM) proteins superfamily                               |
| AT5G64450 | 0.004129737 | 2.8048879 | NYN domain protein                                                       |
| AT1G31355 | 0.007247216 | 2.8046706 | NA                                                                       |
| AT3G17410 | 0.001884427 | 2.8041277 | Protein kinase superfamily protein                                       |
| AT4G23010 | 0.004661997 | 2.8021477 | UDP-galactose transporter 2                                              |
| AT4G25380 | 0.046796042 | 2.7996163 | stress-associated protein 10                                             |
| AT1G23200 | 0.005906146 | 2.7956863 | Plant invertase/pectin methylesterase inhibitor superfamily              |
| AT3G58490 | 0.002267060 | 2.7952369 | Phosphatidic acid phosphatase (PAP2) family protein                      |
| AT1G76440 | 0.003233150 | 2.7923885 | HSP20-like chaperones superfamily protein                                |
| AT5G01380 | 0.013646636 | 2.790319  | Homeodomain-like superfamily protein                                     |
| AT3G50900 | 0.007816118 | 2.7893688 | hypothetical protein                                                     |
| AT1G61890 | 0.024305105 | 2.7853452 | MATE efflux family protein                                               |
| AT3G51890 | 0.001452242 | 2.7817188 | Clathrin light chain protein                                             |
| AT3G47380 | 0.016832709 | 2.7815972 | Plant invertase/pectin methylesterase inhibitor superfamily protein      |
| AT3G56880 | 0.007159786 | 2.7762909 | VQ motif-containing protein                                              |
| AT4G36150 | 0.001920354 | 2.7630633 | Disease resistance protein (TIR-NBS-LRR class) family                    |
| AT1G18890 | 0.000165036 | 2.7618999 | calcium-dependent protein kinase 1                                       |
| AT4G32300 | 0.002708650 | 2.7594508 | S-domain-2 5                                                             |
| AT3G55470 | 0.000582361 | 2.7581233 | Calcium-dependent lipid-binding (CaLB domain) family protein             |
| AT1G03905 | 0.016033057 | 2.7573647 | P-loop containing nucleoside triphosphate hydrolases superfamily protein |
| AT4G10970 | 0.011130161 | 2.7526368 | ribosome maturation factor                                               |
| AT1G27100 | 0.001130517 | 2.7517533 | Actin cross-linking protein                                              |
| AT4G00300 | 0.016154286 | 2.7484936 | receptor-like kinase                                                     |

|           |             |           |                                                                            |
|-----------|-------------|-----------|----------------------------------------------------------------------------|
| AT1G13500 | 0.004573232 | 2.7467603 | hypothetical protein (DUF1262)                                             |
| AT2G47190 | 0.019164700 | 2.7445559 | myb domain protein 2                                                       |
| AT3G29034 | 0.010942170 | 2.739868  | transmembrane protein                                                      |
| AT1G74430 | 0.016272523 | 2.7394749 | myb domain protein 95                                                      |
| AT2G14510 | 0.017977128 | 2.7358378 | Leucine-rich repeat protein kinase family protein                          |
| AT4G35730 | 0.000537322 | 2.7350706 | Regulator of Vps4 activity in the MVB pathway protein                      |
| AT5G58720 | 0.004417089 | 2.7321387 | smr (Small MutS Related) domain-containing protein                         |
| AT4G01740 | 0.000101469 | 2.7272106 | Cysteine/Histidine-rich C1 domain family protein                           |
| AT4G13395 | 0.007492714 | 2.7265814 | ROTUNDIFOLIA like 12                                                       |
| AT4G36945 | 0.003813481 | 2.7228706 | PLC-like phosphodiesterases superfamily protein                            |
| AT1G61260 | 0.001625116 | 2.7187397 | cotton fiber (DUF761)                                                      |
| AT1G05000 | 0.028972926 | 2.7155272 | Phosphotyrosine protein phosphatases superfamily protein                   |
| AT1G05670 | 0.000097314 | 2.7107347 | Pentatricopeptide repeat (PPR-like) superfamily protein                    |
| AT1G18210 | 0.036772329 | 2.7084519 | Calcium-binding EF-hand family protein                                     |
| AT4G24970 | 0.008039427 | 2.7016825 | Histidine kinase-%2C DNA gyrase B-%2C and HSP90-like ATPase family protein |
| AT5G55560 | 0.000075810 | 2.6998115 | Protein kinase superfamily protein                                         |
| AT1G64760 | 0.009731857 | 2.6931765 | O-Glycosyl hydrolases family 17 protein                                    |
| AT4G33060 | 0.028963387 | 2.6916098 | Cyclophilin-like peptidyl-prolyl cis-trans isomerase family protein        |
| AT4G25070 | 0.004772996 | 2.6915934 | caldesmon-like protein                                                     |
| AT2G21120 | 0.000805219 | 2.6845512 | magnesium transporter%2C putative (DUF803)                                 |
| AT5G56610 | 0.017937733 | 2.6823418 | Phosphotyrosine protein phosphatases superfamily protein                   |
| AT1G19270 | 0.004961615 | 2.6718738 | DA1                                                                        |
| AT1G22510 | 0.002764298 | 2.6679711 | E3 ubiquitin-protein ligase RNF170-like protein (DUF 1232)                 |
| AT2G47730 | 0.004536313 | 2.6652535 | glutathione S-transferase phi 8                                            |
| AT5G04310 | 0.001565564 | 2.6647575 | Pectin lyase-like superfamily protein                                      |
| AT2G30720 | 0.009489459 | 2.6614824 | Thioesterase/thiol ester dehydrase-isomerase superfamily protein           |
| AT5G19250 | 0.000939227 | 2.6609857 | Glycoprotein membrane precursor GPI-anchored                               |
| AT1G59265 | 0.017568200 | 2.6591419 | NA                                                                         |
| AT4G25670 | 0.005706010 | 2.6587286 | stress response NST1-like protein                                          |
| AT5G65920 | 0.001160035 | 2.6575572 | ARM repeat superfamily protein                                             |
| AT2G43320 | 0.010441218 | 2.6559352 | S-adenosyl-L-methionine-dependent methyltransferases superfamily protein   |
| AT5G09790 | 0.002842776 | 2.651051  | TRITHORAX-RELATED PROTEIN 5                                                |
| AT3G54100 | 0.000746902 | 2.6488516 | O-fucosyltransferase family protein                                        |

|           |             |           |                                                                          |
|-----------|-------------|-----------|--------------------------------------------------------------------------|
| AT4G01540 | 0.034043454 | 2.6483291 | NAC with transmembrane motif1                                            |
| AT1G35140 | 0.001157320 | 2.648163  | Phosphate-responsive 1 family protein                                    |
| AT2G01340 | 0.042851759 | 2.6473555 | plastid movement impaired protein                                        |
| AT5G59450 | 0.016066403 | 2.6472284 | GRAS family transcription factor                                         |
| AT1G59860 | 0.005694995 | 2.6447904 | HSP20-like chaperones superfamily protein                                |
| AT4G21410 | 0.002824354 | 2.6385074 | cysteine-rich RLK (RECEPTOR-like protein kinase) 29                      |
| AT3G14050 | 0.001238961 | 2.6383065 | RELA/SPOT homolog 2                                                      |
| AT1G18900 | 0.000475408 | 2.6357875 | Pentatricopeptide repeat (PPR) superfamily protein                       |
| AT2G36780 | 0.020958470 | 2.6341827 | UDP-Glycosyltransferase superfamily protein                              |
| AT5G61380 | 0.009168596 | 2.6312874 | CCT motif -containing response regulator protein                         |
| AT2G47680 | 0.005906604 | 2.630443  | zinc finger (CCCH type) helicase family protein                          |
| AT2G30250 | 0.000266618 | 2.629003  | WRKY DNA-binding protein 25                                              |
| AT3G21650 | 0.000165476 | 2.628886  | Protein phosphatase 2A regulatory B subunit family protein               |
| AT1G08450 | 0.002970957 | 2.6278226 | calreticulin 3                                                           |
| AT4G01770 | 0.011414551 | 2.6261491 | rhamnogalacturonan xylosyltransferase 1                                  |
| AT5G10380 | 0.000420031 | 2.6257804 | RING/U-box superfamily protein                                           |
| AT1G18200 | 0.003635821 | 2.6244794 | Rab GTPase-like A11 protein                                              |
| AT4G35500 | 0.000686902 | 2.6235203 | Protein kinase superfamily protein                                       |
| AT2G36430 | 0.004048838 | 2.6228533 | transmembrane protein%2C putative (DUF247)                               |
| AT4G23470 | 0.000676244 | 2.6211798 | PLAC8 family protein                                                     |
| AT1G61380 | 0.003884027 | 2.618939  | S-domain-1 29                                                            |
| AT5G07070 | 0.000028108 | 2.6171533 | CBL-interacting protein kinase 2                                         |
| AT3G13380 | 0.014752903 | 2.6163764 | BRI1-like 3                                                              |
| AT3G01175 | 0.033244597 | 2.609236  | transmembrane protein                                                    |
| AT1G09070 | 0.005160216 | 2.6067213 | soybean gene regulated by cold-2                                         |
| AT2G28970 | 0.046556027 | 2.6057887 | Leucine-rich repeat protein kinase family protein                        |
| AT1G01260 | 0.000120276 | 2.60502   | basic helix-loop-helix (bHLH) DNA-binding superfamily protein            |
| AT5G43890 | 0.001740700 | 2.603896  | Flavin-binding monooxygenase family protein                              |
| AT1G11300 | 0.015294335 | 2.6035498 | G-type lectin S-receptor-like Serine/Threonine-kinase                    |
| AT4G22530 | 0.027632714 | 2.5993313 | S-adenosyl-L-methionine-dependent methyltransferases superfamily protein |
| AT5G67350 | 0.022983979 | 2.5986694 | hypothetical protein                                                     |
| AT1G17255 | 0.004194562 | 2.596433  | NA                                                                       |
| AT2G38290 | 0.009964932 | 2.5917827 | ammonium transporter 2                                                   |

|           |             |           |                                                                          |
|-----------|-------------|-----------|--------------------------------------------------------------------------|
| AT3G01820 | 0.032195134 | 2.5909909 | P-loop containing nucleoside triphosphate hydrolases superfamily protein |
| AT5G67420 | 0.003843656 | 2.5892181 | LOB domain-containing protein 37                                         |
| AT1G58889 | 0.024478953 | 2.586131  | NA                                                                       |
| AT1G06753 | 0.007107305 | 2.5817505 | NA                                                                       |
| AT5G48660 | 0.000173799 | 2.5816691 | B-cell receptor-associated protein 31-like protein                       |
| AT4G22305 | 0.018570250 | 2.581436  | alpha/beta-Hydrolases superfamily protein                                |
| AT1G16480 | 0.000702124 | 2.5780057 | Tetratricopeptide repeat (TPR)-like superfamily protein                  |
| AT3G61640 | 0.000482051 | 2.5763725 | arabinogalactan protein 20                                               |
| AT3G46600 | 0.007203005 | 2.576081  | GRAS family transcription factor                                         |
| AT5G58730 | 0.005224401 | 2.5739803 | pfkB-like carbohydrate kinase family protein                             |
| AT2G41380 | 0.002266348 | 2.5685864 | S-adenosyl-L-methionine-dependent methyltransferases superfamily protein |
| AT3G15340 | 0.018382784 | 2.5683766 | proton pump interactor 2                                                 |
| AT1G66400 | 0.022679873 | 2.5676992 | calmodulin like 23                                                       |
| AT5G13210 | 0.000177393 | 2.5673174 | Uncharacterized conserved protein UCP015417%2C vWA                       |
| AT5G38350 | 0.000074388 | 2.5655578 | Disease resistance protein (NBS-LRR class) family                        |
| AT3G26210 | 0.004694016 | 2.5631038 | cytochrome P450%2C family 71%2C subfamily B%2C polypeptide 23            |
| AT4G36110 | 0.027903245 | 2.5609592 | SAUR-like auxin-responsive protein family                                |
| AT1G67970 | 0.006700777 | 2.560328  | heat shock transcription factor A8                                       |
| AT1G35350 | 0.009885969 | 2.5602323 | EXS (ERD1/XPR1/SYG1) family protein                                      |
| AT1G30550 | 0.008465327 | 2.5577607 | S-adenosyl-L-methionine-dependent methyltransferase superfamily protein  |
| AT1G69520 | 0.007547853 | 2.5518247 | S-adenosyl-L-methionine-dependent methyltransferases superfamily protein |
| AT1G07650 | 0.004702577 | 2.5490461 | Leucine-rich repeat transmembrane protein kinase                         |
| AT4G16892 | 0.035535173 | 2.5461015 | NA                                                                       |
| AT3G51160 | 0.005296363 | 2.5448554 | NAD(P)-binding Rossmann-fold superfamily protein                         |
| AT2G44500 | 0.000175142 | 2.5349133 | O-fucosyltransferase family protein                                      |
| AT5G44290 | 0.000862838 | 2.5343751 | Protein kinase superfamily protein                                       |
| AT5G55350 | 0.018672489 | 2.5315226 | MBOAT (membrane bound O-acyl transferase) family protein                 |
| AT3G49370 | 0.020886944 | 2.527507  | Calcium-dependent protein kinase (CDPK) family protein                   |
| AT3G50060 | 0.000953427 | 2.5218366 | myb domain protein 77                                                    |
| AT1G04053 | 0.020264539 | 2.5207973 | NA                                                                       |
| AT1G26730 | 0.017264026 | 2.5191586 | EXS (ERD1/XPR1/SYG1) family protein                                      |
| AT4G35310 | 0.002593327 | 2.5179304 | calmodulin-domain protein kinase 5                                       |
| AT1G28390 | 0.028058322 | 2.5164787 | Protein kinase superfamily protein                                       |



|           |             |           |                                                                                                        |
|-----------|-------------|-----------|--------------------------------------------------------------------------------------------------------|
| AT4G10390 | 0.006783195 | 2.5155581 | Protein kinase superfamily protein                                                                     |
| AT5G24230 | 0.006639544 | 2.5133332 | Lipase class 3-related protein                                                                         |
| AT5G62070 | 0.024657269 | 2.5123063 | IQ-domain 23                                                                                           |
| AT5G62770 | 0.024107806 | 2.5096272 | membrane-associated kinase regulator%2C putative (DUF1645)                                             |
| AT4G12040 | 0.000171682 | 2.5065108 | A20/AN1-like zinc finger family protein                                                                |
| AT1G61490 | 0.030523571 | 2.5003753 | S-locus lectin protein kinase family protein                                                           |
| AT3G57380 | 0.043126406 | 2.4985017 | Glycosyltransferase family 61 protein                                                                  |
| AT3G18370 | 0.000066206 | 2.4976585 | C2 domain-containing protein                                                                           |
| AT3G07190 | 0.019079838 | 2.4962969 | B-cell receptor-associated protein 31-like protein                                                     |
| AT2G46500 | 0.002613116 | 2.4942733 | phosphoinositide 4-kinase gamma 4                                                                      |
| AT1G20060 | 0.024263956 | 2.4914041 | ATP binding microtubule motor family protein                                                           |
| AT1G63530 | 0.000836131 | 2.4902064 | hypothetical protein                                                                                   |
| AT5G46490 | 0.012159305 | 2.4837436 | Disease resistance protein (TIR-NBS-LRR class) family                                                  |
| AT5G45250 | 0.000494916 | 2.4832763 | Disease resistance protein (TIR-NBS-LRR class) family                                                  |
| AT1G21390 | 0.020924555 | 2.4804385 | embryo defective 2170                                                                                  |
| AT5G04930 | 0.000278216 | 2.4762753 | aminophospholipid ATPase 1                                                                             |
| AT2G38360 | 0.000309275 | 2.4759282 | prenylated RAB acceptor 1.B4                                                                           |
| AT4G28800 | 0.010180846 | 2.4705058 | basic helix-loop-helix (bHLH) DNA-binding superfamily protein                                          |
| AT5G26340 | 0.047216617 | 2.4703507 | Major facilitator superfamily protein                                                                  |
| AT3G23170 | 0.019614772 | 2.4692263 | hypothetical protein                                                                                   |
| AT2G28080 | 0.000703757 | 2.4685832 | UDP-Glycosyltransferase superfamily protein                                                            |
| AT1G66920 | 0.012544653 | 2.4666659 | Protein kinase superfamily protein                                                                     |
| AT1G30810 | 0.024836437 | 2.4579809 | Transcription factor jumonji (jmj) family protein / zinc finger (C5HC2 type) family protein            |
| AT4G23070 | 0.004949296 | 2.4567647 | RHOMBROID-like protein 7                                                                               |
| AT5G39970 | 0.003121459 | 2.4559293 | catalytics                                                                                             |
| AT3G26020 | 0.001782221 | 2.4525476 | Protein phosphatase 2A regulatory B subunit family protein                                             |
| AT1G74740 | 0.000683306 | 2.4514012 | calcium-dependent protein kinase 30                                                                    |
| AT1G61140 | 0.000093804 | 2.4493628 | SNF2 domain-containing protein / helicase domain-containing protein / zinc finger protein-like protein |
| AT4G38540 | 0.003575896 | 2.4480918 | FAD/NAD(P)-binding oxidoreductase family protein                                                       |
| AT1G09970 | 0.000829152 | 2.4458957 | Leucine-rich receptor-like protein kinase family protein                                               |
| AT1G53390 | 0.001769804 | 2.4449639 | P-loop containing nucleoside triphosphate hydrolases superfamily protein                               |
| AT1G61480 | 0.024374364 | 2.4441913 | S-locus lectin protein kinase family protein                                                           |
| AT3G55050 | 0.000202454 | 2.4429393 | Protein phosphatase 2C family protein                                                                  |

|           |             |           |                                                              |
|-----------|-------------|-----------|--------------------------------------------------------------|
| AT1G74490 | 0.031905551 | 2.4420471 | Protein kinase superfamily protein                           |
| AT1G49050 | 0.000099992 | 2.441654  | Eukaryotic aspartyl protease family protein                  |
| AT1G23550 | 0.002160414 | 2.4382479 | similar to RCD one 2                                         |
| AT1G14750 | 0.004434003 | 2.435389  | Cyclin family protein                                        |
| AT2G44480 | 0.048343874 | 2.4353407 | beta glucosidase 17                                          |
| AT3G47130 | 0.030376238 | 2.4345528 | F-box associated ubiquitination effector family protein      |
| AT5G10410 | 0.031121656 | 2.4341679 | ENTH/ANTH/VHS superfamily protein                            |
| AT3G19553 | 0.000784238 | 2.4330479 | Amino acid permease family protein                           |
| AT5G01935 | 0.009017372 | 2.4293927 | NA                                                           |
| AT2G21500 | 0.000000929 | 2.4276942 | RING/U-box superfamily protein                               |
| AT2G20900 | 0.001668238 | 2.4275453 | diacylglycerol kinase 5                                      |
| AT4G36010 | 0.003177679 | 2.4248675 | Pathogenesis-related thaumatin superfamily protein           |
| AT2G02370 | 0.003177320 | 2.4248284 | SNARE associated Golgi protein family                        |
| AT5G52870 | 0.002005481 | 2.4228669 | membrane-associated kinase regulator                         |
| AT5G47710 | 0.015695827 | 2.4226058 | Calcium-dependent lipid-binding (CaLB domain) family protein |
| AT3G45840 | 0.021284102 | 2.4225729 | Cysteine/Histidine-rich C1 domain family protein             |
| AT3G20410 | 0.014296572 | 2.4199836 | calmodulin-domain protein kinase 9                           |
| AT1G17330 | 0.021117916 | 2.4155298 | Metal-dependent phosphohydrolase                             |
| AT5G49900 | 0.025976743 | 2.4154334 | Beta-glucosidase%2C GBA2 type family protein                 |
| AT4G04490 | 0.011444000 | 2.412087  | cysteine-rich RLK (RECEPTOR-like protein kinase) 36          |
| AT3G19020 | 0.002223911 | 2.4114802 | Leucine-rich repeat (LRR) family protein                     |
| AT1G79670 | 0.002241977 | 2.4081697 | Wall-associated kinase family protein                        |
| AT5G47220 | 0.017923927 | 2.4063012 | ethylene responsive element binding factor 2                 |
| AT5G04720 | 0.006731760 | 2.4053004 | ADR1-like 2                                                  |
| AT5G44050 | 0.040839177 | 2.4042964 | MATE efflux family protein                                   |
| AT1G73130 | 0.006278659 | 2.4023146 | mucin                                                        |
| AT1G69810 | 0.037708640 | 2.401802  | WRKY DNA-binding protein 36                                  |
| AT5G13490 | 0.000143477 | 2.3973864 | ADP/ATP carrier 2                                            |
| AT4G30530 | 0.034092221 | 2.392397  | Class I glutamine amidotransferase-like superfamily protein  |
| AT1G29340 | 0.001589341 | 2.3922121 | plant U-box 17                                               |
| AT4G21220 | 0.006298671 | 2.3867445 | Trimeric LpxA-like enzymes superfamily protein               |
| AT5G62460 | 0.035393807 | 2.3847664 | RING/FYVE/PHD zinc finger superfamily protein                |
| AT3G52870 | 0.000344998 | 2.3797684 | IQ calmodulin-binding motif family protein                   |

|           |             |           |                                                                           |
|-----------|-------------|-----------|---------------------------------------------------------------------------|
| AT4G36990 | 0.014774600 | 2.3780567 | heat shock factor 4                                                       |
| AT1G62420 | 0.002009987 | 2.3772374 | DUF506 family protein (DUF506)                                            |
| AT4G09030 | 0.000297141 | 2.3748531 | arabinogalactan protein 10                                                |
| AT5G53830 | 0.004562488 | 2.3747009 | VQ motif-containing protein                                               |
| AT5G33382 | 0.002136345 | 2.3744714 | NA                                                                        |
| AT3G51440 | 0.000091725 | 2.3727636 | Calcium-dependent phosphotriesterase superfamily protein                  |
| AT3G46690 | 0.022236449 | 2.3724516 | UDP-Glycosyltransferase superfamily protein                               |
| AT1G55475 | 0.015898465 | 2.3706243 | hypothetical protein                                                      |
| AT1G07220 | 0.023835179 | 2.3697137 | O-glucosyltransferase rumi-like protein (DUF821)                          |
| AT3G15760 | 0.010790609 | 2.3670097 | cytochrome P450 family protein                                            |
| AT5G48655 | 0.009878210 | 2.3658623 | RING/U-box superfamily protein                                            |
| AT5G67140 | 0.000588259 | 2.3622079 | F-box/RNI-like superfamily protein                                        |
| AT4G37022 | 0.009696618 | 2.3571076 | hypothetical protein                                                      |
| AT5G24510 | 0.003889325 | 2.3546759 | 60S acidic ribosomal protein family                                       |
| AT1G01130 | 0.000252161 | 2.3544851 | CBL-interacting Serine/Threonine-kinase                                   |
| AT3G45290 | 0.016166769 | 2.3539785 | Seven transmembrane MLO family protein                                    |
| AT3G02070 | 0.000098564 | 2.3518977 | Cysteine proteinases superfamily protein                                  |
| AT3G20590 | 0.027440367 | 2.349485  | Late embryogenesis abundant (LEA) hydroxyproline-rich glycoprotein family |
| AT2G30440 | 0.000793375 | 2.3469291 | thylakoid processing peptide                                              |
| AT2G37980 | 0.003496947 | 2.3440946 | O-fucosyltransferase family protein                                       |
| AT1G62422 | 0.006774244 | 2.3420641 | hypothetical protein                                                      |
| AT4G38530 | 0.046819876 | 2.3409523 | phospholipase C1                                                          |
| AT1G08940 | 0.006314940 | 2.3407083 | Phosphoglycerate mutase family protein                                    |
| AT5G28830 | 0.000191252 | 2.3373328 | calcium-binding EF hand family protein                                    |
| AT1G59820 | 0.011220945 | 2.3360918 | aminophospholipid ATPase 3                                                |
| AT4G30600 | 0.000590968 | 2.3303062 | signal recognition particle receptor alpha subunit family protein         |
| AT4G25020 | 0.002293720 | 2.3293872 | D111/G-patch domain-containing protein                                    |
| AT2G06530 | 0.000691314 | 2.327603  | SNF7 family protein                                                       |
| AT1G66910 | 0.000317546 | 2.3257173 | Protein kinase superfamily protein                                        |
| AT4G23240 | 0.049011988 | 2.3252582 | cysteine-rich RLK (RECEPTOR-like protein kinase) 16                       |
| AT1G04330 | 0.010960620 | 2.3243689 | hypothetical protein                                                      |
| AT4G11530 | 0.001334048 | 2.323803  | cysteine-rich RLK (RECEPTOR-like protein kinase) 34                       |
| AT3G15530 | 0.011752743 | 2.3186685 | S-adenosyl-L-methionine-dependent methyltransferases superfamily protein  |

|           |             |           |                                                                          |
|-----------|-------------|-----------|--------------------------------------------------------------------------|
| AT5G10830 | 0.001572437 | 2.3160222 | S-adenosyl-L-methionine-dependent methyltransferases superfamily protein |
| AT5G53130 | 0.000256470 | 2.3101507 | cyclic nucleotide gated channel 1                                        |
| AT1G19330 | 0.024653220 | 2.3094524 | histone deacetylase complex subunit                                      |
| AT3G28940 | 0.007390884 | 2.3045622 | AIG2-like (avirulence induced gene) family protein                       |
| AT2G28890 | 0.000189453 | 2.2995288 | poltergeist like 4                                                       |
| AT1G76040 | 0.020530761 | 2.2974478 | calcium-dependent protein kinase 29                                      |
| AT1G64385 | 0.000961706 | 2.295174  | transmembrane protein                                                    |
| AT5G12940 | 0.002549366 | 2.2941756 | Leucine-rich repeat (LRR) family protein                                 |
| AT4G00850 | 0.015701449 | 2.2939922 | GRF1-interacting factor 3                                                |
| AT1G65310 | 0.010596073 | 2.293941  | xyloglucan endotransglucosylase/hydrolase 17                             |
| AT5G50200 | 0.007516967 | 2.2887284 | nitrate transmembrane transporter                                        |
| AT5G62865 | 0.018298206 | 2.2832468 | hypothetical protein                                                     |
| AT3G26470 | 0.012232330 | 2.2824258 | Powdery mildew resistance protein%2C RPW8 domain-containing protein      |
| AT4G12070 | 0.002789125 | 2.2775179 | hypothetical protein                                                     |
| AT4G31000 | 0.001878135 | 2.2767439 | Calmodulin-binding protein                                               |
| AT1G67530 | 0.011833519 | 2.2750194 | ARM repeat superfamily protein                                           |
| AT2G33640 | 0.032800870 | 2.2748263 | DHHC-type zinc finger family protein                                     |
| AT2G13665 | 0.044325711 | 2.2735436 | NA                                                                       |
| AT1G05340 | 0.000009124 | 2.2730056 | cysteine-rich TM module stress tolerance protein                         |
| AT1G27020 | 0.021143537 | 2.2674407 | plant/protein                                                            |
| AT1G55460 | 0.000020314 | 2.2667227 | DNA/RNA-binding protein Kin17%2C conserved region                        |
| AT4G00330 | 0.000154657 | 2.2663672 | calmodulin-binding receptor-like cytoplasmic kinase 2                    |
| AT3G45040 | 0.008441106 | 2.2648569 | phosphatidate cytidyltransferase family protein                          |
| AT2G39110 | 0.001547795 | 2.2643804 | Protein kinase superfamily protein                                       |
| AT3G27490 | 0.014529753 | 2.2628399 | Cysteine/Histidine-rich C1 domain family protein                         |
| AT5G45630 | 0.023040070 | 2.2578681 | senescence regulator (Protein of unknown function%2C DUF584)             |
| AT2G02800 | 0.000037286 | 2.2538722 | protein kinase 2B                                                        |
| AT4G26400 | 0.005119762 | 2.2520714 | RING/U-box superfamily protein                                           |
| AT1G67460 | 0.038566246 | 2.2505786 | Minichromosome maintenance (MCM2/3/5) family protein                     |
| AT2G44180 | 0.008036535 | 2.2477974 | methionine aminopeptidase 2A                                             |
| AT1G14740 | 0.000274380 | 2.2433984 | class I heat shock protein%2C putative (DUF1423)                         |
| AT2G44010 | 0.016805319 | 2.2424301 | hypothetical protein                                                     |
| AT5G40910 | 0.004174904 | 2.2416594 | Disease resistance protein (TIR-NBS-LRR class) family                    |

|           |             |           |                                                                                         |
|-----------|-------------|-----------|-----------------------------------------------------------------------------------------|
| AT1G63500 | 0.000301631 | 2.2415048 | kinase with tetratricopeptide repeat domain-containing protein                          |
| AT3G47210 | 0.019000985 | 2.2399266 | hypothetical protein (DUF247)                                                           |
| AT2G20950 | 0.007953012 | 2.2364026 | phospholipase-like protein (PEARLI 4) family protein                                    |
| AT3G06370 | 0.026596925 | 2.2363552 | sodium hydrogen exchanger 4                                                             |
| AT1G55920 | 0.002609463 | 2.2342556 | serine acetyltransferase 2%3B1                                                          |
| AT1G11000 | 0.002219942 | 2.2339031 | Seven transmembrane MLO family protein                                                  |
| AT1G33720 | 0.027147514 | 2.2334441 | cytochrome P450%2C family 76%2C subfamily C%2C polypeptide 6                            |
| AT5G51480 | 0.003880655 | 2.2326674 | SKU5 similar 2                                                                          |
| AT1G19300 | 0.000038484 | 2.2309922 | Nucleotide-diphospho-sugar transferases superfamily protein                             |
| AT4G11360 | 0.009927464 | 2.2306737 | RING-H2 finger A1B                                                                      |
| AT1G28600 | 0.026074257 | 2.2276729 | GDSL-like Lipase/Acylhydrolase superfamily protein                                      |
| AT1G32127 | 0.003768677 | 2.2246566 | plant viral-response family protein                                                     |
| AT4G34420 | 0.010857779 | 2.2207633 | P-loop containing nucleoside triphosphate hydrolases superfamily protein                |
| AT1G58400 | 0.024035341 | 2.2194856 | Disease resistance protein (CC-NBS-LRR class) family                                    |
| AT1G58561 | 0.003917452 | 2.2191541 | NA                                                                                      |
| AT2G41730 | 0.002169736 | 2.2185459 | calcium-binding site protein                                                            |
| AT1G67850 | 0.031151130 | 2.2148584 | lysine ketoglutarate reductase trans-splicing protein (DUF707)                          |
| AT5G50570 | 0.008608502 | 2.2120311 | Squamosa promoter-binding protein-like (SBP domain) transcription factor family protein |
| AT2G41110 | 0.001534271 | 2.2105385 | calmodulin 2                                                                            |
| AT4G31980 | 0.003241900 | 2.2052491 | PPPDE thiol peptidase family protein                                                    |
| AT3G60966 | 0.021824942 | 2.2050083 | RING/U-box superfamily protein                                                          |
| AT5G54730 | 0.012433990 | 2.2001052 | yeast autophagy 18 F-like protein                                                       |
| AT1G61415 | 0.046264894 | 2.1998414 | CAP-gly domain linker                                                                   |
| AT5G45750 | 0.001743945 | 2.1995627 | RAB GTPase homolog A1C                                                                  |
| AT5G04020 | 0.024139766 | 2.1969464 | calmodulin binding protein                                                              |
| AT2G04490 | 0.000365106 | 2.1942942 | NA                                                                                      |
| AT2G25850 | 0.000596156 | 2.1939252 | poly(A) polymerase 2                                                                    |
| AT1G04200 | 0.001627470 | 2.1918339 | dyggve-melchior-clausen syndrome protein                                                |
| AT1G75450 | 0.007311286 | 2.1917447 | cytokinin oxidase 5                                                                     |
| AT1G72760 | 0.024768289 | 2.1915254 | Protein kinase superfamily protein                                                      |
| AT1G65490 | 0.001199948 | 2.1913754 | transmembrane protein                                                                   |
| AT1G01440 | 0.004711639 | 2.1879768 | hypothetical protein (DUF3133)                                                          |
| AT5G23520 | 0.004620833 | 2.1866096 | smr (Small MutS Related) domain-containing protein                                      |

|           |             |           |                                                                          |
|-----------|-------------|-----------|--------------------------------------------------------------------------|
| AT2G37110 | 0.001644341 | 2.1851616 | PLAC8 family protein                                                     |
| AT1G30640 | 0.012035826 | 2.1840882 | Protein kinase family protein                                            |
| AT1G04100 | 0.001836324 | 2.1835687 | indoleacetic acid-induced protein 10                                     |
| AT3G63010 | 0.000740818 | 2.1809711 | alpha/beta-Hydrolases superfamily protein                                |
| AT4G37100 | 0.002843806 | 2.1788528 | Pyridoxal phosphate (PLP)-dependent transferases superfamily protein     |
| AT5G35370 | 0.003127673 | 2.174495  | S-locus lectin protein kinase family protein                             |
| AT1G61430 | 0.010430284 | 2.1741342 | S-locus lectin protein kinase family protein                             |
| AT3G23030 | 0.000304625 | 2.1732608 | indole-3-acetic acid inducible 2                                         |
| AT2G18670 | 0.009033414 | 2.1720034 | RING/U-box superfamily protein                                           |
| AT5G39890 | 0.040918966 | 2.1717544 | 2-aminoethanethiol dioxygenase%2C putative (DUF1637)                     |
| AT3G53840 | 0.006497323 | 2.1713226 | Protein kinase superfamily protein                                       |
| AT5G02400 | 0.025093546 | 2.1708589 | pol-like 2                                                               |
| AT3G57750 | 0.001487507 | 2.1693533 | Protein kinase superfamily protein                                       |
| AT3G22160 | 0.014866523 | 2.1688902 | VQ motif-containing protein                                              |
| AT1G71100 | 0.026147511 | 2.1648205 | Ribose 5-phosphate isomerase%2C type A protein                           |
| AT1G34370 | 0.029824467 | 2.1628838 | C2H2 and C2HC zinc fingers superfamily protein                           |
| AT5G62560 | 0.000102521 | 2.1620896 | RING/U-box superfamily protein with ARM repeat domain-containing protein |
| AT4G30910 | 0.033042254 | 2.161599  | Cytosol aminopeptidase family protein                                    |
| AT4G15120 | 0.046934869 | 2.1592121 | VQ motif-containing protein                                              |
| AT5G03630 | 0.010739402 | 2.1570958 | Pyridine nucleotide-disulfide oxidoreductase family protein              |
| AT3G21220 | 0.018805311 | 2.1564365 | MAP kinase kinase 5                                                      |
| AT2G20370 | 0.000118145 | 2.1562251 | Exostosin family protein                                                 |
| AT2G23450 | 0.000164715 | 2.154158  | Protein kinase superfamily protein                                       |
| AT3G21700 | 0.004589923 | 2.1521036 | Ras-related small GTP-binding family protein                             |
| AT5G40780 | 0.042992492 | 2.1501759 | lysine histidine transporter 1                                           |
| AT3G28180 | 0.041821440 | 2.1465399 | Cellulose-synthase-like C4                                               |
| AT1G34200 | 0.001726546 | 2.1463159 | Glyceraldehyde-3-phosphate dehydrogenase-like family protein             |
| AT2G32250 | 0.029251220 | 2.1462084 | FAR1-related sequence 2                                                  |
| AT4G15070 | 0.039411215 | 2.1446554 | Cysteine/Histidine-rich C1 domain family protein                         |
| AT1G74380 | 0.001109230 | 2.1433519 | xyloglucan xylosyltransferase 5                                          |
| AT1G12580 | 0.000180547 | 2.1423483 | phosphoenolpyruvate carboxylase-related kinase 1                         |
| AT1G10650 | 0.002034785 | 2.1415912 | SBP (S-ribonuclease binding protein) family protein                      |
| AT3G27010 | 0.001129667 | 2.1409708 | TEOSINTE BRANCHED 1%2C cycloidea%2C PCF (TCP)-domain family protein 20   |

|           |             |           |                                                                   |
|-----------|-------------|-----------|-------------------------------------------------------------------|
| AT3G19260 | 0.009755651 | 2.1368458 | LAG1 homologue 2                                                  |
| AT2G17290 | 0.020581969 | 2.1358415 | Calcium-dependent protein kinase family protein                   |
| AT4G12000 | 0.048040066 | 2.1353689 | SNARE associated Golgi protein family                             |
| AT3G06435 | 0.017162368 | 2.1331397 | Expressed protein                                                 |
| AT1G19310 | 0.016157877 | 2.1325968 | RING/U-box superfamily protein                                    |
| AT1G27180 | 0.002726605 | 2.1324536 | disease resistance protein (TIR-NBS-LRR class)                    |
| AT3G55430 | 0.011237220 | 2.1308363 | O-Glycosyl hydrolases family 17 protein                           |
| AT5G01730 | 0.001288211 | 2.1277893 | SCAR family protein 4                                             |
| AT4G02195 | 0.014511963 | 2.1272543 | syntaxin of plants 42                                             |
| AT3G14070 | 0.021432929 | 2.1268843 | cation exchanger 9                                                |
| AT4G21730 | 0.034892818 | 2.126616  | NA                                                                |
| AT2G20110 | 0.001957151 | 2.1240967 | Tesmin/TSO1-like CXC domain-containing protein                    |
| AT1G64080 | 0.014455145 | 2.1226038 | membrane-associated kinase regulator                              |
| AT1G79330 | 0.012421179 | 2.1195788 | metacaspase 5                                                     |
| AT2G35510 | 0.003817644 | 2.1191752 | similar to RCD one 1                                              |
| AT3G04480 | 0.000120354 | 2.1171895 | endoribonuclease                                                  |
| AT4G27300 | 0.008861465 | 2.1137919 | S-locus lectin protein kinase family protein                      |
| AT1G66080 | 0.022447752 | 2.1133347 | hikeshi-like protein                                              |
| AT4G16890 | 0.001253509 | 2.1127568 | TIR-NBS-LRR class disease resistance protein                      |
| AT5G27060 | 0.020519401 | 2.1124658 | receptor like protein 53                                          |
| AT2G29120 | 0.037407217 | 2.1119497 | glutamate receptor 2.7                                            |
| AT3G56050 | 0.001082192 | 2.1106401 | Protein kinase family protein                                     |
| AT5G63490 | 0.000368945 | 2.1096448 | CBS / octicosapeptide/Phox/Bemp1 (PB1) domains-containing protein |
| AT4G01870 | 0.030965396 | 2.1094329 | tolB protein-like protein                                         |
| AT5G37540 | 0.005566219 | 2.1025727 | Eukaryotic aspartyl protease family protein                       |
| AT4G11660 | 0.009537555 | 2.1002745 | winged-helix DNA-binding transcription factor family protein      |
| AT1G03770 | 0.041847031 | 2.1000546 | RING 1B                                                           |
| AT1G48320 | 0.009749142 | 2.0994769 | Thioesterase superfamily protein                                  |
| AT2G20320 | 0.029092974 | 2.0987379 | DENN (AEX-3) domain-containing protein                            |
| AT3G18560 | 0.000740262 | 2.095814  | hypothetical protein                                              |
| AT5G36920 | 0.031980125 | 2.095808  | transmembrane protein                                             |
| AT2G41630 | 0.000537769 | 2.091406  | transcription factor IIB                                          |
| AT3G57120 | 0.007329620 | 2.0911217 | Protein kinase superfamily protein                                |

|           |             |           |                                                                                                    |
|-----------|-------------|-----------|----------------------------------------------------------------------------------------------------|
| AT4G24400 | 0.002366026 | 2.0869291 | CBL-interacting protein kinase 8                                                                   |
| AT4G21700 | 0.000478302 | 2.0857432 | DUF2921 family protein%2C putative (DUF2921)                                                       |
| AT5G48385 | 0.001468092 | 2.0849565 | FRIGIDA-like protein                                                                               |
| AT4G24920 | 0.019361800 | 2.0848147 | secE/sec61-gamma protein transport protein                                                         |
| AT1G65800 | 0.048820162 | 2.084543  | receptor kinase 2                                                                                  |
| AT5G64300 | 0.009510290 | 2.08355   | GTP cyclohydrolase II                                                                              |
| AT4G12710 | 0.006442694 | 2.082561  | ARM repeat superfamily protein                                                                     |
| AT2G18630 | 0.001681211 | 2.0822972 | transmembrane protein%2C putative (DUF677)                                                         |
| AT4G19003 | 0.027299783 | 2.0821649 | E2F/DP family winged-helix DNA-binding domain-containing protein                                   |
| AT2G27260 | 0.000062618 | 2.0818804 | Late embryogenesis abundant (LEA) hydroxyproline-rich glycoprotein family                          |
| AT3G11650 | 0.005300283 | 2.0790729 | NDR1/HIN1-like 2                                                                                   |
| AT5G39090 | 0.008888657 | 2.0789316 | HXXXD-type acyl-transferase family protein                                                         |
| AT5G42140 | 0.000730452 | 2.0765598 | Regulator of chromosome condensation (RCC1) family with FYVE zinc finger domain-containing protein |
| AT5G06860 | 0.037486492 | 2.0739661 | polygalacturonase inhibiting protein 1                                                             |
| AT2G44383 | 0.007093160 | 2.071187  | NA                                                                                                 |
| AT2G04305 | 0.002677939 | 2.0701008 | Magnesium transporter CorA-like family protein                                                     |
| AT4G15140 | 0.026687581 | 2.0684064 | hypothetical protein                                                                               |
| AT5G14480 | 0.003198913 | 2.0667339 | beta-1%2C4-N-acetylglucosaminyltransferase family protein                                          |
| AT5G65205 | 0.006402239 | 2.062504  | NAD(P)-binding Rossmann-fold superfamily protein                                                   |
| AT1G74870 | 0.013985353 | 2.0605101 | RING/U-box superfamily protein                                                                     |
| AT1G44100 | 0.002994883 | 2.060058  | amino acid permease 5                                                                              |
| AT1G48060 | 0.013116610 | 2.0595704 | F-box/associated interaction domain protein                                                        |
| AT1G77250 | 0.000145020 | 2.0564757 | RING/FYVE/PHD-type zinc finger family protein                                                      |
| AT4G25470 | 0.022121281 | 2.0550412 | C-repeat/DRE binding factor 2                                                                      |
| AT3G07780 | 0.003144391 | 2.0495574 | potyvirus VPg interacting protein (DUF1423)                                                        |
| AT4G35985 | 0.029560711 | 2.0479432 | Senescence/dehydration-associated protein-like protein                                             |
| AT2G44600 | 0.023485310 | 2.0462465 | hypothetical protein                                                                               |
| AT3G23240 | 0.019189347 | 2.0462298 | ethylene response factor 1                                                                         |
| AT5G08660 | 0.000082653 | 2.0453963 | D-lactate dehydrogenase (DUF668)                                                                   |
| AT1G13390 | 0.015364252 | 2.0434147 | translocase subunit seca                                                                           |
| AT4G04570 | 0.017389030 | 2.0417502 | cysteine-rich RLK (RECEPTOR-like protein kinase) 40                                                |
| AT1G67310 | 0.001520235 | 2.0415041 | Calmodulin-binding transcription activator protein with CG-1 and Ankyrin domain                    |
| AT3G14840 | 0.004421664 | 2.0413766 | Leucine-rich repeat transmembrane protein kinase                                                   |



|           |             |           |                                                                                                      |
|-----------|-------------|-----------|------------------------------------------------------------------------------------------------------|
| AT2G01450 | 0.007160659 | 2.0411423 | MAP kinase 17                                                                                        |
| AT5G03720 | 0.027817753 | 2.0381744 | heat shock transcription factor A3                                                                   |
| AT4G17500 | 0.015920525 | 2.0378669 | ethylene responsive element binding factor 1                                                         |
| AT1G27720 | 0.035462744 | 2.0366376 | TBP-associated factor 4B                                                                             |
| AT1G45207 | 0.002464683 | 2.036201  | Remorin family protein                                                                               |
| AT1G64700 | 0.040482548 | 2.0328285 | DUF4228 domain protein                                                                               |
| AT5G57015 | 0.000257635 | 2.0317884 | casein kinase I-like 12                                                                              |
| AT5G02490 | 0.020483368 | 2.0317295 | Heat shock protein 70 (Hsp 70) family protein                                                        |
| AT2G30990 | 0.003105808 | 2.0285823 | arginine N-methyltransferase%2C putative (DUF688)                                                    |
| AT5G66320 | 0.038324423 | 2.0262469 | GATA transcription factor 5                                                                          |
| AT4G21740 | 0.018011580 | 2.0246572 | transmembrane protein                                                                                |
| AT3G03050 | 0.016172696 | 2.0245974 | cellulose synthase-like D3                                                                           |
| AT3G05660 | 0.011218528 | 2.021618  | receptor like protein 33                                                                             |
| AT2G01300 | 0.007711318 | 2.0183245 | mediator of RNA polymerase II transcription subunit                                                  |
| AT1G64380 | 0.001793920 | 2.0182189 | Integrase-type DNA-binding superfamily protein                                                       |
| AT2G39360 | 0.020192466 | 2.0180813 | Protein kinase superfamily protein                                                                   |
| AT5G67630 | 0.020176106 | 2.0132605 | P-loop containing nucleoside triphosphate hydrolases superfamily protein                             |
| AT2G38250 | 0.002344440 | 2.0110279 | Homeodomain-like superfamily protein                                                                 |
| AT4G19510 | 0.001857571 | 2.010682  | Disease resistance protein (TIR-NBS-LRR class)                                                       |
| AT3G48780 | 0.002072430 | 2.0064306 | serine palmitoyltransferase 1                                                                        |
| AT2G18090 | 0.000270108 | 2.0035257 | PHD finger family protein / SWIB complex BAF60b domain-containing protein / GYF domain-containing pr |
| AT1G24148 | 0.003583519 | 2.0032046 | hypothetical protein                                                                                 |
| AT2G31955 | 0.000663702 | 2.0031931 | cofactor of nitrate reductase and xanthine dehydrogenase 2                                           |
| AT2G04430 | 0.035728440 | 2.0030517 | nudix hydrolase homolog 5                                                                            |
| AT3G45730 | 0.005924566 | 2.0020249 | hypothetical protein                                                                                 |
| AT3G25070 | 0.000047454 | 2.0000551 | RPM1 interacting protein 4                                                                           |
| AT1G19640 | 0.020024823 | 0         | jasmonic acid carboxyl methyltransferase                                                             |
| AT5G09976 | 0.003501912 | 0         | hypothetical protein                                                                                 |
| AT5G04325 | 0.021087054 | 0         | NA                                                                                                   |
| AT4G28485 | 0.023628719 | 0         | transmembrane protein%2C putative (DUF679 domain membrane protein 7)                                 |
| AT5G45120 | 0.038245525 | 0         | Eukaryotic aspartyl protease family protein                                                          |
| AT3G28360 | 0.019681439 | 0         | P-glycoprotein 16                                                                                    |
| AT4G06517 | 0.045509088 | 0         | NA                                                                                                   |

|           |             |           |                                                                   |
|-----------|-------------|-----------|-------------------------------------------------------------------|
| AT5G60320 | 0.037520190 | 0         | Concanavalin A-like lectin protein kinase family protein          |
| AT3G11970 | 0.046963644 | 0         | NA                                                                |
| AT1G36590 | 0.046969281 | 0         | NA                                                                |
| AT1G49005 | 0.013517385 | 0         | CLAVATA3/ESR-RELATED 11                                           |
| AT1G49370 | 0.019249393 | 0         | NA                                                                |
| AT1G80340 | 0.036282031 | 0         | gibberellin 3-oxidase 2                                           |
| AT3G16160 | 0.000050154 | 0         | Tesmin/TSO1-like CXC domain-containing protein                    |
| AT4G06875 | 0.010728739 | 0         | NA                                                                |
| AT4G34940 | 0.034078252 | 0         | armadillo repeat only 1                                           |
| AT1G30250 | 0.018822531 | 0.058012  | hypothetical protein                                              |
| AT2G11780 | 0.000659779 | 0.0660598 | NA                                                                |
| AT4G38860 | 0.013427986 | 0.0742743 | SAUR-like auxin-responsive protein family                         |
| AT5G06520 | 0.004613974 | 0.1042715 | SWAP (Suppressor-of-White-APricot)/surp domain-containing protein |
| AT2G30424 | 0.047049349 | 0.108875  | Homeodomain-like superfamily protein                              |
| AT2G43390 | 0.048211633 | 0.1171431 | hypothetical protein                                              |
| AT5G32107 | 0.007151442 | 0.1241731 | NA                                                                |
| AT4G34770 | 0.001121039 | 0.136045  | SAUR-like auxin-responsive protein family                         |
| AT5G25470 | 0.016870095 | 0.1432494 | AP2/B3-like transcriptional factor family protein                 |
| AT1G31485 | 0.018682241 | 0.1458878 | NA                                                                |
| AT1G26762 | 0.044773724 | 0.1473946 | transmembrane protein                                             |
| AT2G36540 | 0.009144942 | 0.1475569 | Haloacid dehalogenase-like hydrolase (HAD) superfamily protein    |
| AT2G31930 | 0.015534725 | 0.1484764 | hypothetical protein                                              |
| AT3G11810 | 0.018527873 | 0.1617795 | transmembrane protein                                             |
| AT4G34530 | 0.034071236 | 0.162452  | cryptochrome-interacting basic-helix-loop-helix 1                 |
| AT1G18810 | 0.000548342 | 0.1703698 | phytochrome kinase substrate-like protein                         |
| AT4G34760 | 0.000154677 | 0.1718363 | SAUR-like auxin-responsive protein family                         |
| AT1G50280 | 0.009731491 | 0.1746    | Phototropic-responsive NPH3 family protein                        |
| AT2G05914 | 0.009542524 | 0.1837817 | NA                                                                |
| AT1G22380 | 0.021579393 | 0.1837938 | UDP-glucosyl transferase 85A3                                     |
| AT5G28280 | 0.017663674 | 0.1843865 | NA                                                                |
| AT2G34010 | 0.003520066 | 0.1860563 | verprolin                                                         |
| AT2G37030 | 0.038339097 | 0.188887  | SAUR-like auxin-responsive protein family                         |
| AT4G22495 | 0.007287442 | 0.1966578 | hypothetical protein                                              |

|           |             |           |                                                                                             |
|-----------|-------------|-----------|---------------------------------------------------------------------------------------------|
| AT3G10150 | 0.004069066 | 0.1970409 | purple acid phosphatase 16                                                                  |
| AT2G39920 | 0.005247717 | 0.1978087 | HAD superfamily%2C subfamily IIIB acid phosphatase                                          |
| AT4G36808 | 0.037283782 | 0.1989096 | NA                                                                                          |
| AT4G28700 | 0.005254983 | 0.1992266 | ammonium transporter 1%3B4                                                                  |
| AT5G45770 | 0.005955693 | 0.2003665 | receptor like protein 55                                                                    |
| AT2G30615 | 0.000208288 | 0.2021181 | F-box/LRR protein                                                                           |
| AT2G22460 | 0.049863443 | 0.2070245 | MIZU-KUSSEI-like protein (Protein of unknown function%2C DUF617)                            |
| AT1G03987 | 0.018839179 | 0.2082708 | NA                                                                                          |
| AT2G35075 | 0.027936480 | 0.2103099 | hypothetical protein                                                                        |
| AT2G18300 | 0.000154682 | 0.2145362 | basic helix-loop-helix (bHLH) DNA-binding superfamily protein                               |
| AT1G05420 | 0.033413975 | 0.2171473 | ovate family protein 12                                                                     |
| AT5G44680 | 0.010080032 | 0.2177366 | DNA glycosylase superfamily protein                                                         |
| AT4G38850 | 0.047883320 | 0.2193534 | SAUR-like auxin-responsive protein family                                                   |
| AT2G45420 | 0.036047628 | 0.2202562 | LOB domain-containing protein 18                                                            |
| AT3G24065 | 0.033974249 | 0.2277093 | Plant self-incompatibility protein S1 family                                                |
| AT3G09450 | 0.000943891 | 0.2284779 | fusaric acid resistance family protein                                                      |
| AT5G09805 | 0.005556938 | 0.2288696 | inflorescence deficient in abscission (IDA)-like 3                                          |
| AT5G62730 | 0.005513725 | 0.2310266 | Major facilitator superfamily protein                                                       |
| AT1G49470 | 0.035034111 | 0.2374508 | transmembrane epididymal protein (DUF716)                                                   |
| AT2G40130 | 0.047826144 | 0.2386656 | Double Clp-N motif-containing P-loop nucleoside triphosphate hydrolases superfamily protein |
| AT5G18020 | 0.022299062 | 0.2532155 | SAUR-like auxin-responsive protein family                                                   |
| AT3G63088 | 0.024985290 | 0.2570546 | ROTUNDIFOLIA like 14                                                                        |
| AT4G34950 | 0.028636381 | 0.2578128 | Major facilitator superfamily protein                                                       |
| AT1G61230 | 0.021844597 | 0.2588178 | Mannose-binding lectin superfamily protein                                                  |
| AT1G51440 | 0.011519296 | 0.2617809 | alpha/beta-Hydrolases superfamily protein                                                   |
| AT3G11110 | 0.013638062 | 0.2637581 | RING/U-box superfamily protein                                                              |
| AT2G43445 | 0.001245472 | 0.2650574 | F-box and associated interaction domains-containing protein                                 |
| AT4G34790 | 0.018569801 | 0.2681727 | SAUR-like auxin-responsive protein family                                                   |
| AT1G15550 | 0.016867643 | 0.2715519 | gibberellin 3-oxidase 1                                                                     |
| AT1G09180 | 0.025538448 | 0.2720421 | secretion-associated RAS super family 1                                                     |
| AT3G30180 | 0.011923834 | 0.2721842 | brassinosteroid-6-oxidase 2                                                                 |
| AT3G61880 | 0.000791218 | 0.2725805 | cytochrome p450 78a9                                                                        |
| AT3G09160 | 0.005834056 | 0.2734525 | RNA-binding (RRM/RBD/RNP motifs) family protein                                             |

|           |             |           |                                                                          |
|-----------|-------------|-----------|--------------------------------------------------------------------------|
| AT2G40200 | 0.005027780 | 0.2737223 | basic helix-loop-helix (bHLH) DNA-binding superfamily protein            |
| AT1G68238 | 0.012858188 | 0.2741048 | transmembrane protein                                                    |
| AT4G17920 | 0.029600456 | 0.2752463 | RING/U-box superfamily protein                                           |
| AT1G14280 | 0.000956664 | 0.2762202 | phytochrome kinase substrate 2                                           |
| AT2G07724 | 0.044539246 | 0.2777875 | hypothetical protein                                                     |
| AT4G38840 | 0.007545898 | 0.2782558 | SAUR-like auxin-responsive protein family                                |
| AT2G20875 | 0.004032997 | 0.2840744 | epidermal patterning factor 1                                            |
| AT2G35700 | 0.041863488 | 0.2846309 | ERF family protein 38                                                    |
| AT1G01520 | 0.009112415 | 0.2858592 | Homeodomain-like superfamily protein                                     |
| AT3G61840 | 0.033175920 | 0.2862944 | auxin response factor%2C putative (DUF688)                               |
| AT2G38180 | 0.004487182 | 0.2911547 | SGNH hydrolase-type esterase superfamily protein                         |
| AT5G01740 | 0.000740514 | 0.2935794 | Nuclear transport factor 2 (NTF2) family protein                         |
| AT5G41761 | 0.000029667 | 0.2949797 | hypothetical protein                                                     |
| AT5G45820 | 0.001133542 | 0.2951721 | CBL-interacting protein kinase 20                                        |
| AT2G02950 | 0.000795313 | 0.2984186 | phytochrome kinase substrate 1                                           |
| AT5G61570 | 0.016454636 | 0.2987693 | Protein kinase superfamily protein                                       |
| AT1G08747 | 0.026724195 | 0.299607  | NA                                                                       |
| AT4G19060 | 0.048298050 | 0.3035229 | P-loop containing nucleoside triphosphate hydrolases superfamily protein |
| AT5G53710 | 0.018615832 | 0.3048945 | hypothetical protein                                                     |
| AT4G30230 | 0.033801411 | 0.306612  | hypothetical protein                                                     |
| AT5G20670 | 0.008934133 | 0.3071946 | DUF1677 family protein (DUF1677)                                         |
| AT4G35720 | 0.004144908 | 0.3094491 | DUF241 domain protein%2C putative (DUF241)                               |
| AT3G51400 | 0.019920320 | 0.3122184 | hypothetical protein (DUF241)                                            |
| AT5G01880 | 0.010207102 | 0.3130379 | RING/U-box superfamily protein                                           |
| AT2G46310 | 0.008348409 | 0.3133843 | cytokinin response factor 5                                              |
| AT3G50825 | 0.019874557 | 0.3142224 | NA                                                                       |
| AT4G05690 | 0.038677385 | 0.3161192 | NA                                                                       |
| AT1G68520 | 0.008738169 | 0.3201182 | B-box type zinc finger protein with CCT domain-containing protein        |
| AT5G11070 | 0.000138741 | 0.3208965 | hypothetical protein                                                     |
| AT3G15570 | 0.009264119 | 0.3218151 | Phototropic-responsive NPH3 family protein                               |
| AT5G25240 | 0.022094520 | 0.3224867 | stress induced protein                                                   |
| AT1G68460 | 0.032912399 | 0.3226398 | isopentenyltransferase 1                                                 |
| AT4G15550 | 0.005306507 | 0.3236602 | indole-3-acetate beta-D-glucosyltransferase                              |

|           |             |           |                                                                                                       |
|-----------|-------------|-----------|-------------------------------------------------------------------------------------------------------|
| AT5G49330 | 0.041969656 | 0.3240453 | myb domain protein 111                                                                                |
| AT3G05936 | 0.045921516 | 0.3246154 | hypothetical protein                                                                                  |
| AT1G76190 | 0.045073843 | 0.3255608 | SAUR-like auxin-responsive protein family                                                             |
| AT2G47670 | 0.047744694 | 0.3273666 | Plant invertase/pectin methylesterase inhibitor superfamily protein                                   |
| AT1G05990 | 0.017053335 | 0.3278034 | EF hand calcium-binding protein family                                                                |
| AT2G36050 | 0.000331245 | 0.3289401 | ovate family protein 15                                                                               |
| AT4G34750 | 0.009512479 | 0.3290711 | SAUR-like auxin-responsive protein family                                                             |
| AT3G57040 | 0.003688428 | 0.3295861 | response regulator 9                                                                                  |
| AT1G52530 | 0.046763037 | 0.3305784 | Hus1-like protein                                                                                     |
| AT4G25780 | 0.000005534 | 0.3310228 | CAP (Cysteine-rich secretory proteins%2C Antigen 5%2C and Pathogenesis-related 1 protein) superfamily |
| AT5G23280 | 0.019962921 | 0.3314378 | TCP family transcription factor                                                                       |
| AT5G62920 | 0.011228509 | 0.3314977 | response regulator 6                                                                                  |
| AT3G59940 | 0.010319831 | 0.3333454 | Galactose oxidase/kelch repeat superfamily protein                                                    |
| AT2G25220 | 0.007500608 | 0.3340865 | Protein kinase superfamily protein                                                                    |
| AT2G29090 | 0.000638502 | 0.339132  | cytochrome P450%2C family 707%2C subfamily A%2C polypeptide 2                                         |
| AT1G17960 | 0.003685198 | 0.3400084 | Threonyl-tRNA synthetase                                                                              |
| AT1G06083 | 0.046914201 | 0.3403254 | NA                                                                                                    |
| AT5G57180 | 0.000507135 | 0.3413631 | chloroplast import apparatus 2                                                                        |
| AT3G19850 | 0.006632180 | 0.3413787 | Phototropic-responsive NPH3 family protein                                                            |
| AT5G39680 | 0.002333114 | 0.3427271 | Pentatricopeptide repeat (PPR) superfamily protein                                                    |
| AT4G19170 | 0.008215879 | 0.3427857 | nine-cis-epoxycarotenoid dioxygenase 4                                                                |
| AT5G02760 | 0.000856476 | 0.3434398 | Protein phosphatase 2C family protein                                                                 |
| AT1G18735 | 0.009267934 | 0.3436761 | NA                                                                                                    |
| AT2G14060 | 0.046592128 | 0.3438157 | S-adenosyl-L-methionine-dependent methyltransferases superfamily protein                              |
| AT1G28000 | 0.009152553 | 0.3449664 | Pentatricopeptide repeat (PPR) superfamily protein                                                    |
| AT3G46760 | 0.045970314 | 0.349128  | Protein kinase superfamily protein                                                                    |
| AT1G75960 | 0.000648482 | 0.3492334 | AMP-dependent synthetase and ligase family protein                                                    |
| AT1G26790 | 0.002772141 | 0.3509082 | Dof-type zinc finger DNA-binding family protein                                                       |
| AT4G18980 | 0.047735412 | 0.3521988 | AtS40-3                                                                                               |
| AT2G41940 | 0.000713943 | 0.3533288 | zinc finger protein 8                                                                                 |
| AT4G37540 | 0.001214524 | 0.3537806 | LOB domain-containing protein 39                                                                      |
| AT5G04190 | 0.000224507 | 0.3565546 | phytochrome kinase substrate 4                                                                        |
| AT1G49200 | 0.029837623 | 0.3566977 | RING/U-box superfamily protein                                                                        |

|           |             |           |                                                                                       |
|-----------|-------------|-----------|---------------------------------------------------------------------------------------|
| AT1G64405 | 0.031893088 | 0.3599697 | hypothetical protein                                                                  |
| AT5G13180 | 0.005182047 | 0.362318  | NAC domain containing protein 83                                                      |
| AT1G49660 | 0.010845606 | 0.3635341 | carboxyesterase 5                                                                     |
| AT1G18400 | 0.037368950 | 0.3657864 | BR enhanced expression 1                                                              |
| AT5G62430 | 0.000826279 | 0.3659258 | cycling DOF factor 1                                                                  |
| AT3G50570 | 0.006448042 | 0.3661763 | hydroxyproline-rich glycoprotein family protein                                       |
| AT2G40610 | 0.019678613 | 0.3676188 | expansin A8                                                                           |
| AT3G07675 | 0.040483624 | 0.367941  | NA                                                                                    |
| AT3G02020 | 0.034272612 | 0.3680482 | aspartate kinase 3                                                                    |
| AT3G48720 | 0.007322094 | 0.369436  | HXXXD-type acyl-transferase family protein                                            |
| AT3G08660 | 0.042701711 | 0.3702768 | Phototropic-responsive NPH3 family protein                                            |
| AT1G68570 | 0.003436206 | 0.3702848 | Major facilitator superfamily protein                                                 |
| AT1G60060 | 0.004173628 | 0.3705756 | Serine/threonine-protein kinase WNK (With No Lysine)-like protein                     |
| AT1G71970 | 0.001931326 | 0.3710446 | hypothetical protein                                                                  |
| AT3G19680 | 0.001765405 | 0.3730232 | hypothetical protein (DUF1005)                                                        |
| AT1G06977 | 0.019793750 | 0.3771236 | NA                                                                                    |
| AT5G11060 | 0.006207214 | 0.3774471 | homeobox protein knotted-1-like 4                                                     |
| AT1G50040 | 0.009452148 | 0.3776752 | formin-like protein%2C putative (DUF1005)                                             |
| AT2G23130 | 0.002944456 | 0.3816669 | arabinogalactan protein 17                                                            |
| AT4G22560 | 0.038307576 | 0.3840616 | sulfated surface-like glycoprotein                                                    |
| AT5G15850 | 0.009096946 | 0.3853356 | CONSTANS-like 1                                                                       |
| AT1G64590 | 0.035717060 | 0.3865472 | NAD(P)-binding Rossmann-fold superfamily protein                                      |
| AT5G09930 | 0.040578224 | 0.3867555 | ABC transporter family protein                                                        |
| AT4G25990 | 0.045815366 | 0.3877164 | CCT motif family protein                                                              |
| AT4G13540 | 0.029353351 | 0.3878004 | golgin family A protein                                                               |
| AT5G61590 | 0.002373546 | 0.3893014 | Integrase-type DNA-binding superfamily protein                                        |
| AT5G62100 | 0.033796036 | 0.389809  | BCL-2-associated athanogene 2                                                         |
| AT5G15310 | 0.043766360 | 0.3899151 | myb domain protein 16                                                                 |
| AT5G02650 | 0.011405510 | 0.3915605 | hypothetical protein                                                                  |
| AT2G34610 | 0.001266370 | 0.3916508 | cotton fiber protein                                                                  |
| AT3G04140 | 0.000096729 | 0.3926539 | Ankyrin repeat family protein                                                         |
| AT2G25625 | 0.024104306 | 0.3929318 | histone deacetylase-like protein                                                      |
| AT3G45210 | 0.005476274 | 0.3936556 | transcription initiation factor TFIID subunit (Protein of unknown function%2C DUF584) |

|           |             |           |                                                                                                    |
|-----------|-------------|-----------|----------------------------------------------------------------------------------------------------|
| AT3G49970 | 0.013720725 | 0.3959317 | Phototropic-responsive NPH3 family protein                                                         |
| AT2G05765 | 0.037481230 | 0.4006643 | NA                                                                                                 |
| AT2G20180 | 0.019726454 | 0.4018912 | phytochrome interacting factor 3-like 5                                                            |
| AT3G18845 | 0.031246166 | 0.4020415 | NA                                                                                                 |
| AT1G49130 | 0.022555746 | 0.4022934 | B-box type zinc finger protein with CCT domain-containing protein                                  |
| AT5G07240 | 0.006803781 | 0.4024607 | IQ-domain 24                                                                                       |
| AT1G67626 | 0.022252682 | 0.4025386 | NA                                                                                                 |
| AT2G47440 | 0.000767618 | 0.4034865 | Tetratricopeptide repeat (TPR)-like superfamily protein                                            |
| AT2G28200 | 0.041862960 | 0.4042079 | C2H2-type zinc finger family protein                                                               |
| AT3G08795 | 0.002992520 | 0.4046771 | NA                                                                                                 |
| AT5G55570 | 0.015162989 | 0.4047334 | transmembrane protein                                                                              |
| AT1G10550 | 0.001477987 | 0.4048179 | xyloglucan:xyloglucosyl transferase 33                                                             |
| AT1G65920 | 0.004363294 | 0.4058915 | Regulator of chromosome condensation (RCC1) family with FYVE zinc finger domain-containing protein |
| AT1G26761 | 0.006149722 | 0.4061758 | Arabinanase/levansucrase/invertase                                                                 |
| AT5G54145 | 0.012865439 | 0.4075333 | hypothetical protein                                                                               |
| AT5G60850 | 0.032031930 | 0.4078572 | OBF binding protein 4                                                                              |
| AT2G27770 | 0.041147128 | 0.40939   | DUF868 family protein (DUF868)                                                                     |
| AT5G43270 | 0.005474609 | 0.4103985 | squamosa promoter binding protein-like 2                                                           |
| AT4G25750 | 0.002223676 | 0.4120323 | ABC-2 type transporter family protein                                                              |
| AT1G27940 | 0.004286577 | 0.4122795 | P-glycoprotein 13                                                                                  |
| AT2G41510 | 0.018416949 | 0.4130922 | cytokinin oxidase/dehydrogenase 1                                                                  |
| AT1G26920 | 0.000096508 | 0.4132913 | zinc finger CCHC domain protein                                                                    |
| AT4G35783 | 0.029346799 | 0.4136296 | ROTUNDIFOLIA like 6                                                                                |
| AT1G14920 | 0.000075287 | 0.4139102 | GRAS family transcription factor family protein                                                    |
| AT1G11440 | 0.047626076 | 0.4139806 | hypothetical protein                                                                               |
| AT5G54190 | 0.010418984 | 0.4141012 | protochlorophyllide oxidoreductase A                                                               |
| AT3G06120 | 0.037277771 | 0.4141487 | basic helix-loop-helix (bHLH) DNA-binding superfamily protein                                      |
| AT3G61900 | 0.012390102 | 0.4159455 | SAUR-like auxin-responsive protein family                                                          |
| AT5G59920 | 0.021071534 | 0.4160808 | Cysteine/Histidine-rich C1 domain family protein                                                   |
| AT4G06255 | 0.023702421 | 0.4162358 | NA                                                                                                 |
| AT5G43870 | 0.026119694 | 0.4169539 | auxin canalization protein (DUF828)                                                                |
| AT4G16563 | 0.011982485 | 0.4171656 | Eukaryotic aspartyl protease family protein                                                        |
| AT4G03400 | 0.010647491 | 0.417496  | Auxin-responsive GH3 family protein                                                                |

|           |             |           |                                                                                                       |
|-----------|-------------|-----------|-------------------------------------------------------------------------------------------------------|
| AT5G63195 | 0.022365417 | 0.4180125 | NA                                                                                                    |
| AT4G29905 | 0.011595987 | 0.4184069 | hypothetical protein                                                                                  |
| AT1G77760 | 0.043729491 | 0.4208488 | nitrate reductase 1                                                                                   |
| AT4G16515 | 0.007209612 | 0.4209458 | root meristem growth factor                                                                           |
| AT3G14810 | 0.002686850 | 0.421299  | mechanosensitive channel of small conductance-like 5                                                  |
| AT2G15020 | 0.000841613 | 0.4216038 | hypothetical protein                                                                                  |
| AT1G68130 | 0.002266461 | 0.4229499 | indeterminate(ID)-domain 14                                                                           |
| AT3G50630 | 0.025067413 | 0.4230922 | KIP-related protein 2                                                                                 |
| AT1G10020 | 0.004052656 | 0.4253004 | formin-like protein (DUF1005)                                                                         |
| AT5G25840 | 0.001723454 | 0.425499  | DUF1677 family protein (DUF1677)                                                                      |
| AT5G10310 | 0.030917899 | 0.4255284 | EPIDERMAL PATTERNING FACTOR-like protein                                                              |
| AT1G52990 | 0.015413285 | 0.4258375 | thioredoxin family protein                                                                            |
| AT1G45545 | 0.022556178 | 0.4258674 | WEAK CHLOROPLAST MOVEMENT UNDER BLUE LIGHT-like protein (DUF827)                                      |
| AT5G19200 | 0.003520226 | 0.4259523 | NAD(P)-binding Rossmann-fold superfamily protein                                                      |
| AT5G44190 | 0.000636660 | 0.4266088 | GOLDEN2-like 2                                                                                        |
| AT3G61890 | 0.017520478 | 0.4267764 | homeobox 12                                                                                           |
| AT5G61455 | 0.025484341 | 0.4269182 | NA                                                                                                    |
| AT3G28040 | 0.000586289 | 0.4270616 | Leucine-rich receptor-like protein kinase family protein                                              |
| AT3G18550 | 0.029281861 | 0.4272037 | TCP family transcription factor                                                                       |
| AT1G73830 | 0.010057701 | 0.4275491 | BR enhanced expression 3                                                                              |
| AT1G18350 | 0.017254770 | 0.4282073 | MAP kinase kinase 7                                                                                   |
| AT5G65660 | 0.000939755 | 0.4287255 | hydroxyproline-rich glycoprotein family protein                                                       |
| AT1G75770 | 0.038096964 | 0.4302778 | hypothetical protein                                                                                  |
| AT5G51030 | 0.012624685 | 0.4303456 | NAD(P)-binding Rossmann-fold superfamily protein                                                      |
| AT2G38995 | 0.024187400 | 0.4305625 | O-acyltransferase (WSD1-like) family protein                                                          |
| AT3G06070 | 0.001369365 | 0.4306574 | hypothetical protein                                                                                  |
| AT5G20790 | 0.036865951 | 0.4307367 | transmembrane protein                                                                                 |
| AT2G42380 | 0.004787921 | 0.4307736 | Basic-leucine zipper (bZIP) transcription factor family protein                                       |
| AT1G54820 | 0.037799385 | 0.4314132 | Protein kinase superfamily protein                                                                    |
| AT4G19380 | 0.000008851 | 0.4321602 | Long-chain fatty alcohol dehydrogenase family protein                                                 |
| AT4G22730 | 0.004085092 | 0.4321726 | Leucine-rich repeat protein kinase family protein                                                     |
| AT2G19980 | 0.013639180 | 0.4333114 | CAP (Cysteine-rich secretory proteins%2C Antigen 5%2C and Pathogenesis-related 1 protein) superfamily |
| AT1G79900 | 0.048741257 | 0.4347922 | Mitochondrial substrate carrier family protein                                                        |



|           |             |           |                                                                           |
|-----------|-------------|-----------|---------------------------------------------------------------------------|
| AT4G35270 | 0.003033125 | 0.4360493 | Plant regulator RWP-RK family protein                                     |
| AT5G03615 | 0.043528242 | 0.4362827 | NA                                                                        |
| AT2G43200 | 0.002825971 | 0.4366593 | S-adenosyl-L-methionine-dependent methyltransferases superfamily protein  |
| AT3G58120 | 0.004077370 | 0.4370869 | Basic-leucine zipper (bZIP) transcription factor family protein           |
| AT5G07640 | 0.015677300 | 0.4381959 | RING/U-box superfamily protein                                            |
| AT5G25190 | 0.004015060 | 0.4383812 | Integrase-type DNA-binding superfamily protein                            |
| AT2G29170 | 0.049649906 | 0.4387345 | NAD(P)-binding Rossmann-fold superfamily protein                          |
| AT1G15260 | 0.025934626 | 0.4402859 | LOW protein: ATP-dependent RNA helicase-like protein                      |
| AT1G21260 | 0.001394926 | 0.440475  | NA                                                                        |
| AT3G53690 | 0.035861249 | 0.4406735 | RING/U-box superfamily protein                                            |
| AT4G33666 | 0.003226887 | 0.4415459 | hypothetical protein                                                      |
| AT2G04560 | 0.025221561 | 0.4428723 | transferases%2C transferring glycosyl groups                              |
| AT1G66950 | 0.036626728 | 0.4445613 | pleiotropic drug resistance 11                                            |
| AT3G07350 | 0.001614127 | 0.4445774 | sulfate/thiosulfate import ATP-binding protein%2C putative (DUF506)       |
| AT2G42870 | 0.025494500 | 0.4449085 | phy rapidly regulated 1                                                   |
| AT3G50750 | 0.031071379 | 0.4452705 | BES1/BZR1 homolog 1                                                       |
| AT1G34245 | 0.021072036 | 0.4452921 | Putative membrane lipoprotein                                             |
| AT1G70230 | 0.022442505 | 0.4456858 | TRICHOME BIREFRINGENCE-LIKE 27                                            |
| AT1G23205 | 0.002265802 | 0.4458189 | Plant invertase/pectin methylesterase inhibitor superfamily protein       |
| AT1G74090 | 0.015611325 | 0.4462414 | desulfo-glucosinolate sulfotransferase 18                                 |
| AT1G75580 | 0.019376265 | 0.4470168 | SAUR-like auxin-responsive protein family                                 |
| AT3G25590 | 0.022250671 | 0.4470763 | micronuclear linker histone polyprotein-like protein                      |
| AT4G18830 | 0.000685111 | 0.447449  | ovate family protein 5                                                    |
| AT1G72180 | 0.002934087 | 0.4475723 | Leucine-rich receptor-like protein kinase family protein                  |
| AT1G79770 | 0.025998025 | 0.4478949 | CASP-like protein (DUF1677)                                               |
| AT2G43340 | 0.005582183 | 0.4498449 | hypothetical protein (DUF1685)                                            |
| AT4G21510 | 0.032596669 | 0.4499435 | F-box family protein                                                      |
| AT5G35777 | 0.005173242 | 0.4500927 | NA                                                                        |
| AT4G01410 | 0.000567671 | 0.4503821 | Late embryogenesis abundant (LEA) hydroxyproline-rich glycoprotein family |
| AT2G40330 | 0.002094065 | 0.4522653 | PYR1-like 6                                                               |
| AT1G73210 | 0.016772612 | 0.4524174 | hypothetical protein (DUF789)                                             |
| AT3G11090 | 0.000454738 | 0.4548711 | LOB domain-containing protein 21                                          |
| AT2G45560 | 0.007990652 | 0.4550563 | cytochrome P450%2C family 76%2C subfamily C%2C polypeptide 1              |

|           |             |           |                                                                                             |
|-----------|-------------|-----------|---------------------------------------------------------------------------------------------|
| AT5G19190 | 0.004121625 | 0.4551799 | hypothetical protein                                                                        |
| AT2G23430 | 0.009314590 | 0.4555909 | Cyclin-dependent kinase inhibitor family protein                                            |
| AT3G25640 | 0.008137069 | 0.4562693 | MIZU-KUSSEI-like protein (Protein of unknown function%2C DUF617)                            |
| AT2G42280 | 0.011352717 | 0.4580308 | basic helix-loop-helix (bHLH) DNA-binding superfamily protein                               |
| AT3G61590 | 0.007738512 | 0.4583618 | Galactose oxidase/kelch repeat superfamily protein                                          |
| AT1G05690 | 0.027671817 | 0.4584406 | BTB and TAZ domain protein 3                                                                |
| AT2G09510 | 0.018466165 | 0.4590036 | NA                                                                                          |
| AT3G46550 | 0.022710677 | 0.459451  | Fasciclin-like arabinogalactan family protein                                               |
| AT5G19970 | 0.030455108 | 0.4594561 | GRAS family transcription factor family protein                                             |
| AT3G22104 | 0.000759292 | 0.4595389 | Phototropic-responsive NPH3 family protein                                                  |
| AT1G07720 | 0.018538824 | 0.4601605 | 3-ketoacyl-CoA synthase 3                                                                   |
| AT5G63450 | 0.014509477 | 0.4602869 | cytochrome P450%2C family 94%2C subfamily B%2C polypeptide 1                                |
| AT1G62520 | 0.008392761 | 0.460319  | sulfated surface-like glycoprotein                                                          |
| AT4G28690 | 0.024802988 | 0.4605835 | hypothetical protein                                                                        |
| AT1G50270 | 0.045888394 | 0.4608352 | Pentatricopeptide repeat (PPR) superfamily protein                                          |
| AT3G10525 | 0.005892812 | 0.4621273 | LOSS OF GIANT CELLS FROM ORGANS                                                             |
| AT1G25440 | 0.021512232 | 0.4621334 | B-box type zinc finger protein with CCT domain-containing protein                           |
| AT1G62975 | 0.002290378 | 0.4623563 | basic helix-loop-helix (bHLH) DNA-binding superfamily protein                               |
| AT3G06145 | 0.022446804 | 0.46248   | RING zinc finger protein                                                                    |
| AT4G27410 | 0.007903711 | 0.4633857 | NAC (No Apical Meristem) domain transcriptional regulator superfamily protein               |
| AT3G14760 | 0.037163443 | 0.4645891 | transmembrane protein                                                                       |
| AT5G16560 | 0.001050967 | 0.4650353 | Homeodomain-like superfamily protein                                                        |
| AT1G29195 | 0.029454918 | 0.4651106 | phosphatidylinositol 4-phosphate 5-kinase MSS4-like protein                                 |
| AT1G05562 | 0.000435687 | 0.4652148 | NA                                                                                          |
| AT3G61750 | 0.024766417 | 0.4654458 | Cytochrome b561/ferric reductase transmembrane with DOMON related domain-containing protein |
| AT3G59400 | 0.003050427 | 0.4655359 | protein GENOMES UNCOUPLED 4                                                                 |
| AT3G50700 | 0.001404562 | 0.4660682 | indeterminate(ID)-domain 2                                                                  |
| AT1G05560 | 0.000572158 | 0.466207  | UDP-glucosyltransferase 75B1                                                                |
| AT2G29970 | 0.000232737 | 0.4663917 | Double Clp-N motif-containing P-loop nucleoside triphosphate hydrolases superfamily protein |
| AT3G10570 | 0.021776928 | 0.4675773 | cytochrome P450%2C family 77%2C subfamily A%2C polypeptide 6                                |
| AT1G13250 | 0.037766311 | 0.4675775 | galacturonosyltransferase-like 3                                                            |
| AT4G29140 | 0.005032651 | 0.467821  | MATE efflux family protein                                                                  |
| AT2G03310 | 0.000831559 | 0.4691062 | transmembrane protein                                                                       |

|           |             |           |                                                                          |
|-----------|-------------|-----------|--------------------------------------------------------------------------|
| AT3G49650 | 0.000737719 | 0.4691213 | P-loop containing nucleoside triphosphate hydrolases superfamily protein |
| AT3G11410 | 0.001585291 | 0.4702704 | protein phosphatase 2CA                                                  |
| AT2G28410 | 0.033827617 | 0.471144  | transmembrane protein                                                    |
| AT4G13770 | 0.041744645 | 0.4716162 | cytochrome P450%2C family 83%2C subfamily A%2C polypeptide 1             |
| AT5G64620 | 0.018226662 | 0.4718286 | cell wall / vacuolar inhibitor of fructosidase 2                         |
| AT3G45260 | 0.003246872 | 0.4719826 | C2H2-like zinc finger protein                                            |
| AT2G17230 | 0.000329677 | 0.4725908 | EXORDIUM like 5                                                          |
| AT5G39080 | 0.000149168 | 0.4735582 | HXXXD-type acyl-transferase family protein                               |
| AT5G03120 | 0.016458544 | 0.4738953 | transmembrane protein                                                    |
| AT3G61950 | 0.047818527 | 0.473963  | basic helix-loop-helix (bHLH) DNA-binding superfamily protein            |
| AT5G06790 | 0.008059163 | 0.4740282 | cotton fiber protein                                                     |
| AT3G09275 | 0.029836726 | 0.4751712 | NA                                                                       |
| AT1G18100 | 0.012082212 | 0.4758688 | PEBP (phosphatidylethanolamine-binding protein) family protein           |
| AT2G18560 | 0.007377346 | 0.4759062 | UDP-Glycosyltransferase superfamily protein                              |
| AT1G68530 | 0.000142564 | 0.4759226 | 3-ketoacyl-CoA synthase 6                                                |
| AT3G49670 | 0.002576042 | 0.4764384 | Leucine-rich receptor-like protein kinase family protein                 |
| AT5G14350 | 0.005317495 | 0.4764412 | Pentatricopeptide repeat (PPR) superfamily protein                       |
| AT3G14330 | 0.016736131 | 0.4767878 | Tetratricopeptide repeat (TPR)-like superfamily protein                  |
| AT5G06250 | 0.041695239 | 0.4775978 | AP2/B3-like transcriptional factor family protein                        |
| AT1G11150 | 0.011476357 | 0.477667  | NA                                                                       |
| AT2G44230 | 0.002986536 | 0.4777104 | hypothetical protein (DUF946)                                            |
| AT3G47500 | 0.000583271 | 0.4782584 | cycling DOF factor 3                                                     |
| AT4G28780 | 0.018727477 | 0.4785642 | GDSL-like Lipase/Acylhydrolase superfamily protein                       |
| AT1G26600 | 0.038672246 | 0.4786406 | CLAVATA3/ESR-RELATED 9                                                   |
| AT1G01030 | 0.006441873 | 0.4786669 | AP2/B3-like transcriptional factor family protein                        |
| AT3G48360 | 0.008608505 | 0.4788255 | BTB and TAZ domain protein 2                                             |
| AT5G24570 | 0.001605324 | 0.4788378 | hypothetical protein                                                     |
| AT5G26200 | 0.009712404 | 0.4790697 | Mitochondrial substrate carrier family protein                           |
| AT5G50160 | 0.024009096 | 0.479559  | ferric reduction oxidase 8                                               |
| AT3G06770 | 0.015445890 | 0.479673  | Pectin lyase-like superfamily protein                                    |
| AT5G48730 | 0.004683690 | 0.480376  | Pentatricopeptide repeat (PPR) superfamily protein                       |
| AT5G51550 | 0.010168242 | 0.4805629 | EXORDIUM like 3                                                          |
| AT5G06530 | 0.014913420 | 0.4814177 | ABC-2 type transporter family protein                                    |

|           |             |           |                                                                               |
|-----------|-------------|-----------|-------------------------------------------------------------------------------|
| AT1G78995 | 0.013681409 | 0.4817452 | hypothetical protein                                                          |
| AT1G75460 | 0.006601262 | 0.4819414 | ATP-dependent protease La (LON) domain protein                                |
| AT3G53380 | 0.007732790 | 0.4820106 | Concanavalin A-like lectin protein kinase family protein                      |
| AT5G22930 | 0.009997139 | 0.4832131 | enabled-like protein (DUF1635)                                                |
| AT3G42800 | 0.029857510 | 0.483667  | AF-like protein                                                               |
| AT3G02380 | 0.005706203 | 0.4837627 | CONSTANS-like 2                                                               |
| AT5G54630 | 0.007287262 | 0.4838086 | zinc finger protein-like protein                                              |
| AT1G52880 | 0.001461425 | 0.483989  | NAC (No Apical Meristem) domain transcriptional regulator superfamily protein |
| AT2G34490 | 0.026521365 | 0.4840044 | cytochrome P450%2C family 710%2C subfamily A%2C polypeptide 2                 |
| AT1G53870 | 0.039715280 | 0.484036  | LURP-one-like protein (DUF567)                                                |
| AT1G53890 | 0.039645233 | 0.4840365 | LURP-one-like protein (DUF567)                                                |
| AT3G01350 | 0.039282381 | 0.4841128 | Major facilitator superfamily protein                                         |
| AT1G65620 | 0.019726587 | 0.4845234 | Lateral organ boundaries (LOB) domain family protein                          |
| AT1G16500 | 0.028209957 | 0.4848973 | filamentous hemagglutinin transporter                                         |
| AT2G41990 | 0.040381877 | 0.485017  | late embryogenesis abundant protein                                           |
| AT1G21460 | 0.029133956 | 0.4852453 | Nodulin MtN3 family protein                                                   |
| AT5G28030 | 0.039802192 | 0.4852515 | L-cysteine desulfhydrase 1                                                    |
| AT5G55620 | 0.036917094 | 0.4856293 | hypothetical protein                                                          |
| AT1G21920 | 0.022458169 | 0.4857407 | Histone H3 K4-specific methyltransferase SET7/9 family protein                |
| AT1G02380 | 0.001213255 | 0.4859358 | transmembrane protein                                                         |
| AT2G40900 | 0.047579506 | 0.4860954 | nodulin MtN21 /EamA-like transporter family protein                           |
| AT5G53210 | 0.016627032 | 0.486486  | basic helix-loop-helix (bHLH) DNA-binding superfamily protein                 |
| AT5G46690 | 0.027426672 | 0.48671   | beta HLH protein 71                                                           |
| AT2G15050 | 0.021480244 | 0.486764  | lipid transfer protein                                                        |
| AT5G28300 | 0.005212914 | 0.4868206 | Duplicated homeodomain-like superfamily protein                               |
| AT4G31730 | 0.032708304 | 0.4871225 | glutamine dumper 1                                                            |
| AT3G25717 | 0.012990682 | 0.4871553 | ROTUNDIFOLIA like 16                                                          |
| AT1G77850 | 0.012542220 | 0.4876119 | auxin response factor 17                                                      |
| AT5G47610 | 0.035847863 | 0.4890092 | RING/U-box superfamily protein                                                |
| AT5G07670 | 0.002335382 | 0.489223  | RNI-like superfamily protein                                                  |
| AT3G16560 | 0.008561219 | 0.4906271 | Protein phosphatase 2C family protein                                         |
| AT3G55110 | 0.039519532 | 0.4908041 | ABC-2 type transporter family protein                                         |
| AT1G24330 | 0.010916303 | 0.4910497 | ARM repeat superfamily protein                                                |

|           |             |           |                                                                          |
|-----------|-------------|-----------|--------------------------------------------------------------------------|
| AT5G64190 | 0.045857798 | 0.4913678 | neuronal PAS domain protein                                              |
| AT3G16330 | 0.016388880 | 0.4913695 | Avr9/Cf-9 rapidly elicited protein                                       |
| AT1G06180 | 0.007366828 | 0.491711  | myb domain protein 13                                                    |
| AT1G60010 | 0.022507203 | 0.4921197 | D-ribose-binding periplasmic protein                                     |
| AT5G51670 | 0.006442415 | 0.4922367 | hypothetical protein (DUF668)                                            |
| AT4G36240 | 0.033943854 | 0.4936687 | GATA transcription factor 7                                              |
| AT4G09350 | 0.034447439 | 0.4939032 | Chaperone DnaJ-domain superfamily protein                                |
| AT1G68550 | 0.004448296 | 0.493981  | Integrase-type DNA-binding superfamily protein                           |
| AT2G39250 | 0.037455950 | 0.4941807 | Integrase-type DNA-binding superfamily protein                           |
| AT5G48880 | 0.044573734 | 0.4952246 | peroxisomal 3-keto-acyl-CoA thiolase 2                                   |
| AT4G06536 | 0.040131723 | 0.4958741 | SPla/Ryanodine receptor (SPRY) domain-containing protein                 |
| AT2G01940 | 0.010830595 | 0.4960385 | C2H2-like zinc finger protein                                            |
| AT5G56860 | 0.006054983 | 0.4963312 | GATA type zinc finger transcription factor family protein                |
| AT2G36026 | 0.026407148 | 0.4964355 | Ovate family protein                                                     |
| AT2G03750 | 0.006705614 | 0.4971813 | P-loop containing nucleoside triphosphate hydrolases superfamily protein |
| AT5G08150 | 0.000969843 | 0.4987148 | suppressor of phytochrome b 5                                            |
| AT1G70940 | 0.023728145 | 0.4991056 | Auxin efflux carrier family protein                                      |
| AT1G80760 | 0.040562269 | 0.4994533 | NOD26-like intrinsic protein 6%3B1                                       |
